# Supplementary material
Source: publisher figshare collection journal article supplement (https://acs.figshare.com/ndownloader/files/3724618)
Supplement: Supplementary file 1 [file 3724618]

 
data_mar134-260-abs
_publ_requested_journal          'Crystal Growth & Design'
_publ_section_title              
'Crystal Growth, dynamic and charge transfer properties of New Coronene Charge Transfer Complexes'
_publ_section_abstract  
;
Single Crystals of the Charge-Transfer salts coronene/F4-TCNQ have been grown. 
The crystal structure was determined using single crystal X-ray diffraction. 
Dynamic and charge transfer properties have been investigated.
;
_publ_contact_author_name        "'Dr. Olga Kataeva ' "
_publ_contact_author_address     
;Institute of Organic &
 Physical Chemistry
 Arbuzov Str.8
 420088 Kazan
 Russia 
;
_publ_contact_author_email       olga-kataeva@yandex.ru
_publ_contact_author_fax         '+7 843 2319168'
loop_
_publ_author_name
_publ_author_address
'Kataeva, Olga N.'
; Institute of Organic &
 Physical Chemistry
 Arbuzov Str.8
 420088 Kazan
 Russia,
;
'Kriznforov, Mikhail'
; Institute of Organic &
 Physical Chemistry
 Arbuzov Str.8
 420088 Kazan
 Russia,
;
'Budnikova, Yulia'
; Institute of Organic &
 Physical Chemistry
 Arbuzov Str.8
 420088 Kazan
 Russia,
;
'Islamov, Daut'
;Department of Chemistry, Kazan State University, 
Kremlevskaya St. 18, 
420008, Kazan, 
Russian Federation
;
'Burganov, Timur'
; Institute of Organic &
 Physical Chemistry
 Arbuzov Str.8
 420088 Kazan
 Russia,
;
'Vandyukov, Alexander'
; Institute of Organic &
 Physical Chemistry
 Arbuzov Str.8
 420088 Kazan
 Russia,
;
'Lyssenko, Konstantin'
; Institute of Organoelement Compounds 
of Russian Academy of Sciences, 
Vavilova str. 28, 
119334 Moscow, 
Russian Federation
;
'Mahns, Benjamin'
; IFW Dresden
 P.O. Box 270116
 D-01171 Dresden
 Germany 
;
'Nohr, Markus'
; IFW Dresden
 P.O. Box 270116
 D-01171 Dresden
 Germany 
;
'Hampel, Silke'
; IFW Dresden
 P.O. Box 270116
 D-01171 Dresden
 Germany 
;
'Knupfer, Martin'
; IFW Dresden
 P.O. Box 270116
 D-01171 Dresden
 Germany 
;
_audit_creation_method           SHELXL-2014/7
_shelx_SHELXL_version_number     2014/7
_chemical_name_systematic        ?
_chemical_name_common            'Coronene F4TCNQ'
_chemical_formula_moiety         '2(C24 H12), C12 F4 N4'
_chemical_formula_sum            'C60 H24 F4 N4'
_chemical_melting_point          ?

_exptl_crystal_description       needle
_exptl_crystal_colour            black
_diffrn_ambient_temperature      260(2)
_chemical_formula_weight         876.83

loop_
_atom_type_symbol
_atom_type_description
_atom_type_scat_dispersion_real
_atom_type_scat_dispersion_imag
_atom_type_scat_source
C C 0.0181 0.0091 'International Tables Vol C Tables 4.2.6.8 and 6.1.1.4'
H H 0.0000 0.0000 'International Tables Vol C Tables 4.2.6.8 and 6.1.1.4'
N N 0.0311 0.0180 'International Tables Vol C Tables 4.2.6.8 and 6.1.1.4'
F F 0.0727 0.0534 'International Tables Vol C Tables 4.2.6.8 and 6.1.1.4'

_space_group_crystal_system      monoclinic
_space_group_IT_number           14
_space_group_name_H-M_alt        'P 21/n'
_space_group_name_Hall           '-P 2yn'

_shelx_space_group_comment       
;
The symmetry employed for this shelxl refinement is uniquely defined
by the following loop, which should always be used as a source of
symmetry information in preference to the above space-group names.
They are only intended as comments.
;

loop_
_space_group_symop_operation_xyz
'x, y, z'
'-x+1/2, y+1/2, -z+1/2'
'-x, -y, -z'
'x-1/2, -y-1/2, z-1/2'

_cell_length_a                   10.6777(3)
_cell_length_b                   9.6459(3)
_cell_length_c                   19.3207(6)
_cell_angle_alpha                90
_cell_angle_beta                 92.9970(10)
_cell_angle_gamma                90
_cell_volume                     1987.23(10)
_cell_formula_units_Z            2
_cell_measurement_temperature    260(2)
_cell_measurement_reflns_used    9936
_cell_measurement_theta_min      6.19
_cell_measurement_theta_max      68.68
_exptl_crystal_density_meas      ?
_exptl_crystal_density_method    ?
_exptl_crystal_density_diffrn    1.465
_exptl_crystal_F_000             896
_exptl_transmission_factor_min   ?
_exptl_transmission_factor_max   ?
_exptl_crystal_size_max          0.480
_exptl_crystal_size_mid          0.120
_exptl_crystal_size_min          0.080
_exptl_absorpt_coefficient_mu    0.815
_shelx_estimated_absorpt_T_min   0.696
_shelx_estimated_absorpt_T_max   0.938
_exptl_absorpt_correction_type   multi-scan
_exptl_absorpt_correction_T_min  0.7806
_exptl_absorpt_correction_T_max  0.9839
_exptl_absorpt_process_details   
'SADABS version 2.10 (Sheldrick,Bruker AXS Inc.)'
_exptl_absorpt_special_details   ?
_diffrn_radiation_probe          x-ray
_diffrn_radiation_type           CuK\a
_diffrn_radiation_wavelength     1.54178
_diffrn_source                   'microfocus tube'
_diffrn_measurement_device_type  'Bruker Kappa APEX DUO CCD'
_diffrn_measurement_method       '\f and \w scans'
_diffrn_detector_area_resol_mean ?
_diffrn_reflns_number            22280
_diffrn_reflns_av_unetI/netI     0.0106
_diffrn_reflns_av_R_equivalents  0.0191
_diffrn_reflns_limit_h_min       -12
_diffrn_reflns_limit_h_max       12
_diffrn_reflns_limit_k_min       -11
_diffrn_reflns_limit_k_max       11
_diffrn_reflns_limit_l_min       -22
_diffrn_reflns_limit_l_max       22
_diffrn_reflns_theta_min         6.187
_diffrn_reflns_theta_max         66.978
_diffrn_reflns_theta_full        66.978
_diffrn_measured_fraction_theta_max 0.995
_diffrn_measured_fraction_theta_full 0.995
_diffrn_reflns_Laue_measured_fraction_max 0.995
_diffrn_reflns_Laue_measured_fraction_full 0.995
_diffrn_reflns_point_group_measured_fraction_max 0.995
_diffrn_reflns_point_group_measured_fraction_full 0.995
_reflns_number_total             3524
_reflns_number_gt                3108
_reflns_threshold_expression     'I > 2\s(I)'
_reflns_Friedel_coverage         0.000
_reflns_Friedel_fraction_max     .
_reflns_Friedel_fraction_full    .

_reflns_special_details          
;
 Reflections were merged by SHELXL according to the crystal
 class for the calculation of statistics and refinement.
 
 _reflns_Friedel_fraction is defined as the number of unique
 Friedel pairs measured divided by the number that would be
 possible theoretically, ignoring centric projections and
 systematic absences.
;

_computing_data_collection       
'APEX2  v2, 1-4  (Bruker AXS, 2005-2007)'
_computing_cell_refinement       
'APEX2  v2, 1-4  (Bruker AXS, 2005-2007)'
_computing_data_reduction        
'SAINT NT v6.0 (Bruker AXS, 2003)'
_computing_structure_solution    
'SHELXS-97 (Sheldrick, 2008)'
_computing_structure_refinement  
'SHELXL-2013 (Sheldrick, 2013)'
_computing_molecular_graphics    
'ORTEP-3 for Windows (Farrugia, 1997)'
_computing_publication_material  
'WinGX (Farrugia 1999), enCIFer (Allen et al. 2004)'
_refine_special_details          ?
_refine_ls_structure_factor_coef Fsqd
_refine_ls_matrix_type           full
_refine_ls_weighting_scheme      calc
_refine_ls_weighting_details     
'w=1/[\s^2^(Fo^2^)+(0.1164P)^2^+1.4775P] where P=(Fo^2^+2Fc^2^)/3'
_atom_sites_solution_primary     ?
_atom_sites_solution_secondary   ?
_atom_sites_solution_hydrogens   geom
_refine_ls_hydrogen_treatment    constr
_refine_ls_extinction_method     none
_refine_ls_extinction_coef       .
_refine_ls_number_reflns         3524
_refine_ls_number_parameters     307
_refine_ls_number_restraints     0
_refine_ls_R_factor_all          0.0861
_refine_ls_R_factor_gt           0.0800
_refine_ls_wR_factor_ref         0.2307
_refine_ls_wR_factor_gt          0.2258
_refine_ls_goodness_of_fit_ref   1.108
_refine_ls_restrained_S_all      1.108
_refine_ls_shift/su_max          0.000
_refine_ls_shift/su_mean         0.000

loop_
_atom_site_label
_atom_site_type_symbol
_atom_site_fract_x
_atom_site_fract_y
_atom_site_fract_z
_atom_site_U_iso_or_equiv
_atom_site_adp_type
_atom_site_occupancy
_atom_site_site_symmetry_order
_atom_site_calc_flag
_atom_site_refinement_flags_posn
_atom_site_refinement_flags_adp
_atom_site_refinement_flags_occupancy
_atom_site_disorder_assembly
_atom_site_disorder_group
C1 C 0.0867(4) 0.2960(7) 0.1508(4) 0.121(2) Uani 1 1 d . . . . .
H1A H 0.0666 0.2617 0.1938 0.146 Uiso 1 1 calc R U . . .
C2 C 0.0786(4) 0.2107(5) 0.0974(4) 0.121(2) Uani 1 1 d . . . . .
H2A H 0.0567 0.1185 0.1040 0.145 Uiso 1 1 calc R U . . .
C3 C 0.0919(4) 0.1758(5) -0.0300(5) 0.131(3) Uani 1 1 d . . . . .
H3A H 0.0682 0.0836 -0.0257 0.157 Uiso 1 1 calc R U . . .
C4 C 0.1143(4) 0.2248(7) -0.0940(4) 0.135(3) Uani 1 1 d . . . . .
H4A H 0.1045 0.1664 -0.1321 0.162 Uiso 1 1 calc R U . . .
C5 C 0.1787(4) 0.4255(8) -0.1708(2) 0.120(2) Uani 1 1 d . . . . .
H5A H 0.1685 0.3744 -0.2115 0.144 Uiso 1 1 calc R U . . .
C6 C 0.2190(4) 0.5615(9) -0.1726(2) 0.122(2) Uani 1 1 d . . . . .
H6A H 0.2362 0.5983 -0.2155 0.147 Uiso 1 1 calc R U . . .
C7 C 0.2779(4) 0.7881(6) -0.1201(3) 0.1005(17) Uani 1 1 d . . . . .
H7A H 0.2968 0.8275 -0.1623 0.121 Uiso 1 1 calc R U . . .
C8 C 0.2900(4) 0.8648(6) -0.0593(4) 0.115(2) Uani 1 1 d . . . . .
H8A H 0.3193 0.9553 -0.0618 0.138 Uiso 1 1 calc R U . . .
C9 C 0.2710(3) 0.8955(4) 0.0652(3) 0.0954(15) Uani 1 1 d . . . . .
H9A H 0.3000 0.9862 0.0629 0.114 Uiso 1 1 calc R U . . .
C10 C 0.2394(4) 0.8448(6) 0.1270(3) 0.1110(19) Uani 1 1 d . . . . .
H10A H 0.2444 0.9022 0.1657 0.133 Uiso 1 1 calc R U . . .
C11 C 0.1682(4) 0.6533(8) 0.1965(2) 0.1035(18) Uani 1 1 d . . . . .
H11A H 0.1735 0.7093 0.2357 0.124 Uiso 1 1 calc R U . . .
C12 C 0.1303(4) 0.5223(8) 0.2038(2) 0.112(2) Uani 1 1 d . . . . .
H12A H 0.1085 0.4904 0.2470 0.135 Uiso 1 1 calc R U . . .
C13 C 0.1030(3) 0.2587(4) 0.0304(3) 0.0877(14) Uani 1 1 d . . . . .
C14 C 0.1520(3) 0.3620(5) -0.1033(2) 0.0930(15) Uani 1 1 d . . . . .
C15 C 0.2351(3) 0.6448(5) -0.11683(19) 0.0894(14) Uani 1 1 d . . . . .
C16 C 0.2615(3) 0.8151(4) 0.0034(3) 0.0826(11) Uani 1 1 d . . . . .
C17 C 0.2002(3) 0.7108(5) 0.1340(2) 0.0839(12) Uani 1 1 d . . . . .
C18 C 0.1233(3) 0.4332(5) 0.14687(19) 0.0852(12) Uani 1 1 d . . . . .
C19 C 0.1407(2) 0.3986(3) 0.02183(16) 0.0519(7) Uani 1 1 d . . . . .
C20 C 0.1657(2) 0.4483(3) -0.04478(14) 0.0507(7) Uani 1 1 d . . . . .
C21 C 0.2062(2) 0.5896(3) -0.05184(15) 0.0562(8) Uani 1 1 d . . . . .
C22 C 0.2192(2) 0.6752(3) 0.00848(18) 0.0564(8) Uani 1 1 d . . . . .
C23 C 0.1900(2) 0.6223(3) 0.07330(15) 0.0551(7) Uani 1 1 d . . . . .
C24 C 0.1517(2) 0.4865(3) 0.07963(14) 0.0548(7) Uani 1 1 d . . . . .
C25 C 0.4672(2) 0.4211(3) 0.05593(12) 0.0446(6) Uani 1 1 d . . . . .
F25 F 0.43315(15) 0.34530(17) 0.10932(7) 0.0561(5) Uani 1 1 d . . . . .
C26 C 0.5079(2) 0.5616(3) 0.06885(12) 0.0432(6) Uani 1 1 d . . . . .
C27 C 0.5396(2) 0.6358(3) 0.00770(13) 0.0445(6) Uani 1 1 d . . . . .
F27 F 0.57976(15) 0.76572(17) 0.01438(8) 0.0560(5) Uani 1 1 d . . . . .
C28 C 0.5172(2) 0.6191(3) 0.13418(13) 0.0485(6) Uani 1 1 d . . . . .
C29 C 0.5549(3) 0.7590(3) 0.14798(14) 0.0542(7) Uani 1 1 d . . . . .
N29 N 0.5836(3) 0.8695(3) 0.16394(14) 0.0719(8) Uani 1 1 d . . . . .
C30 C 0.4916(3) 0.5448(3) 0.19617(14) 0.0561(7) Uani 1 1 d . . . . .
N30 N 0.4760(3) 0.4937(3) 0.24819(14) 0.0778(9) Uani 1 1 d . . . . .

loop_
_atom_site_aniso_label
_atom_site_aniso_U_11
_atom_site_aniso_U_22
_atom_site_aniso_U_33
_atom_site_aniso_U_23
_atom_site_aniso_U_13
_atom_site_aniso_U_12
C1 0.073(3) 0.140(5) 0.155(5) 0.101(4) 0.045(3) 0.044(3)
C2 0.059(2) 0.083(3) 0.226(7) 0.080(4) 0.051(3) 0.015(2)
C3 0.045(2) 0.059(2) 0.288(9) -0.051(4) 0.004(4) -0.0023(17)
C4 0.047(2) 0.136(5) 0.217(7) -0.122(5) -0.026(3) 0.020(3)
C5 0.059(2) 0.233(7) 0.067(3) -0.077(4) -0.0188(19) 0.058(3)
C6 0.068(3) 0.249(8) 0.050(2) 0.007(4) 0.0015(18) 0.065(4)
C7 0.072(2) 0.121(4) 0.112(3) 0.080(3) 0.034(2) 0.025(2)
C8 0.068(2) 0.102(3) 0.178(6) 0.071(4) 0.032(3) 0.022(2)
C9 0.056(2) 0.058(2) 0.171(5) -0.045(3) -0.003(2) 0.0050(16)
C10 0.060(2) 0.124(4) 0.148(5) -0.074(4) -0.014(3) 0.012(2)
C11 0.063(2) 0.198(6) 0.049(2) -0.023(3) -0.0086(17) 0.034(3)
C12 0.071(3) 0.213(7) 0.054(2) 0.027(3) 0.0101(18) 0.050(3)
C13 0.0367(15) 0.059(2) 0.169(4) 0.019(2) 0.016(2) 0.0062(14)
C14 0.0425(16) 0.141(4) 0.093(3) -0.068(3) -0.0164(16) 0.031(2)
C15 0.0564(18) 0.151(4) 0.063(2) 0.043(2) 0.0175(15) 0.041(2)
C16 0.0498(17) 0.068(2) 0.131(3) 0.014(2) 0.0129(19) 0.0100(15)
C17 0.0449(16) 0.110(3) 0.095(3) -0.027(2) -0.0096(16) 0.0224(18)
C18 0.0518(18) 0.132(4) 0.073(2) 0.031(2) 0.0142(16) 0.036(2)
C19 0.0300(12) 0.0511(15) 0.0749(19) 0.0111(13) 0.0063(11) 0.0070(10)
C20 0.0310(12) 0.0653(17) 0.0554(15) -0.0113(13) -0.0022(10) 0.0125(11)
C21 0.0347(12) 0.079(2) 0.0557(16) 0.0266(14) 0.0083(11) 0.0188(13)
C22 0.0342(13) 0.0408(14) 0.094(2) 0.0004(14) 0.0003(13) 0.0083(10)
C23 0.0380(13) 0.0729(19) 0.0540(16) -0.0094(14) -0.0019(11) 0.0133(12)
C24 0.0373(13) 0.077(2) 0.0508(15) 0.0109(13) 0.0045(11) 0.0173(13)
C25 0.0358(12) 0.0603(15) 0.0378(12) 0.0021(11) 0.0045(9) 0.0013(11)
F25 0.0600(9) 0.0670(10) 0.0421(8) 0.0043(7) 0.0087(7) -0.0049(7)
C26 0.0311(11) 0.0594(15) 0.0389(12) -0.0032(11) 0.0017(9) 0.0032(10)
C27 0.0333(12) 0.0549(15) 0.0453(13) -0.0034(11) 0.0012(10) 0.0002(10)
F27 0.0601(9) 0.0555(9) 0.0526(9) -0.0048(7) 0.0043(7) -0.0080(7)
C28 0.0390(12) 0.0649(17) 0.0417(13) -0.0050(12) 0.0034(10) 0.0030(11)
C29 0.0499(14) 0.072(2) 0.0404(14) -0.0095(13) 0.0031(11) 0.0001(13)
N29 0.0830(19) 0.0781(19) 0.0548(15) -0.0141(13) 0.0053(13) -0.0093(15)
C30 0.0552(16) 0.0716(18) 0.0422(15) -0.0080(13) 0.0084(12) 0.0017(13)
N30 0.096(2) 0.091(2) 0.0478(15) -0.0026(14) 0.0186(14) -0.0024(17)

_geom_special_details            
;
 All esds (except the esd in the dihedral angle between two l.s. planes)
 are estimated using the full covariance matrix.  The cell esds are taken
 into account individually in the estimation of esds in distances, angles
 and torsion angles; correlations between esds in cell parameters are only
 used when they are defined by crystal symmetry.  An approximate (isotropic)
 treatment of cell esds is used for estimating esds involving l.s. planes.
;

loop_
_geom_bond_atom_site_label_1
_geom_bond_atom_site_label_2
_geom_bond_distance
_geom_bond_site_symmetry_2
_geom_bond_publ_flag
C1 C2 1.318(9) . ?
C1 C18 1.384(8) . ?
C1 H1A 0.9300 . ?
C2 C13 1.413(8) . ?
C2 H2A 0.9300 . ?
C3 C4 1.356(9) . ?
C3 C13 1.414(9) . ?
C3 H3A 0.9300 . ?
C4 C14 1.397(9) . ?
C4 H4A 0.9300 . ?
C5 C6 1.381(8) . ?
C5 C14 1.481(8) . ?
C5 H5A 0.9300 . ?
C6 C15 1.348(8) . ?
C6 H6A 0.9300 . ?
C7 C8 1.389(8) . ?
C7 C15 1.458(7) . ?
C7 H7A 0.9300 . ?
C8 C16 1.352(7) . ?
C8 H8A 0.9300 . ?
C9 C10 1.350(7) . ?
C9 C16 1.422(6) . ?
C9 H9A 0.9300 . ?
C10 C17 1.367(7) . ?
C10 H10A 0.9300 . ?
C11 C12 1.336(8) . ?
C11 C17 1.388(7) . ?
C11 H11A 0.9300 . ?
C12 C18 1.394(7) . ?
C12 H12A 0.9300 . ?
C13 C19 1.420(4) . ?
C14 C20 1.406(4) . ?
C15 C21 1.413(4) . ?
C16 C22 1.429(5) . ?
C17 C23 1.450(5) . ?
C18 C24 1.444(4) . ?
C19 C24 1.402(4) . ?
C19 C20 1.412(4) . ?
C20 C21 1.439(4) . ?
C21 C22 1.429(5) . ?
C22 C23 1.402(4) . ?
C23 C24 1.380(4) . ?
C25 F25 1.330(3) . ?
C25 C27 1.345(4) 3_665 ?
C25 C26 1.441(4) . ?
C26 C28 1.378(3) . ?
C26 C27 1.437(4) . ?
C27 F27 1.329(3) . ?
C27 C25 1.345(4) 3_665 ?
C28 C29 1.429(4) . ?
C28 C30 1.434(4) . ?
C29 N29 1.147(4) . ?
C30 N30 1.139(4) . ?

loop_
_geom_angle_atom_site_label_1
_geom_angle_atom_site_label_2
_geom_angle_atom_site_label_3
_geom_angle
_geom_angle_site_symmetry_1
_geom_angle_site_symmetry_3
_geom_angle_publ_flag
C2 C1 C18 124.2(5) . . ?
C2 C1 H1A 117.9 . . ?
C18 C1 H1A 117.9 . . ?
C1 C2 C13 120.3(4) . . ?
C1 C2 H2A 119.8 . . ?
C13 C2 H2A 119.8 . . ?
C4 C3 C13 122.9(5) . . ?
C4 C3 H3A 118.5 . . ?
C13 C3 H3A 118.5 . . ?
C3 C4 C14 120.9(5) . . ?
C3 C4 H4A 119.5 . . ?
C14 C4 H4A 119.5 . . ?
C6 C5 C14 119.3(4) . . ?
C6 C5 H5A 120.4 . . ?
C14 C5 H5A 120.4 . . ?
C15 C6 C5 125.0(5) . . ?
C15 C6 H6A 117.5 . . ?
C5 C6 H6A 117.5 . . ?
C8 C7 C15 118.9(4) . . ?
C8 C7 H7A 120.6 . . ?
C15 C7 H7A 120.6 . . ?
C16 C8 C7 123.7(5) . . ?
C16 C8 H8A 118.2 . . ?
C7 C8 H8A 118.2 . . ?
C10 C9 C16 122.3(4) . . ?
C10 C9 H9A 118.8 . . ?
C16 C9 H9A 118.8 . . ?
C9 C10 C17 121.5(4) . . ?
C9 C10 H10A 119.3 . . ?
C17 C10 H10A 119.3 . . ?
C12 C11 C17 124.0(5) . . ?
C12 C11 H11A 118.0 . . ?
C17 C11 H11A 118.0 . . ?
C11 C12 C18 120.2(4) . . ?
C11 C12 H12A 119.9 . . ?
C18 C12 H12A 119.9 . . ?
C2 C13 C3 124.1(5) . . ?
C2 C13 C19 119.0(5) . . ?
C3 C13 C19 117.0(5) . . ?
C4 C14 C20 118.3(5) . . ?
C4 C14 C5 125.1(5) . . ?
C20 C14 C5 116.5(5) . . ?
C6 C15 C21 117.4(5) . . ?
C6 C15 C7 123.9(5) . . ?
C21 C15 C7 118.7(4) . . ?
C8 C16 C9 123.3(5) . . ?
C8 C16 C22 118.9(5) . . ?
C9 C16 C22 117.8(4) . . ?
C10 C17 C11 123.7(5) . . ?
C10 C17 C23 119.1(4) . . ?
C11 C17 C23 117.2(5) . . ?
C1 C18 C12 123.4(5) . . ?
C1 C18 C24 117.6(5) . . ?
C12 C18 C24 119.0(5) . . ?
C24 C19 C20 120.6(3) . . ?
C24 C19 C13 119.7(3) . . ?
C20 C19 C13 119.8(3) . . ?
C14 C20 C19 121.1(3) . . ?
C14 C20 C21 120.2(3) . . ?
C19 C20 C21 118.7(3) . . ?
C15 C21 C22 119.4(3) . . ?
C15 C21 C20 121.5(3) . . ?
C22 C21 C20 119.1(2) . . ?
C23 C22 C16 119.4(3) . . ?
C23 C22 C21 120.1(3) . . ?
C16 C22 C21 120.5(3) . . ?
C24 C23 C22 120.3(3) . . ?
C24 C23 C17 119.8(3) . . ?
C22 C23 C17 119.8(3) . . ?
C23 C24 C19 121.1(3) . . ?
C23 C24 C18 119.7(3) . . ?
C19 C24 C18 119.2(3) . . ?
F25 C25 C27 118.7(2) . 3_665 ?
F25 C25 C26 118.3(2) . . ?
C27 C25 C26 122.9(2) 3_665 . ?
C28 C26 C27 122.9(3) . . ?
C28 C26 C25 123.0(2) . . ?
C27 C26 C25 114.1(2) . . ?
F27 C27 C25 118.4(2) . 3_665 ?
F27 C27 C26 118.6(2) . . ?
C25 C27 C26 123.0(3) 3_665 . ?
C26 C28 C29 123.9(2) . . ?
C26 C28 C30 123.8(3) . . ?
C29 C28 C30 112.3(2) . . ?
N29 C29 C28 175.1(3) . . ?
N30 C30 C28 174.7(3) . . ?

loop_
_geom_torsion_atom_site_label_1
_geom_torsion_atom_site_label_2
_geom_torsion_atom_site_label_3
_geom_torsion_atom_site_label_4
_geom_torsion
_geom_torsion_site_symmetry_1
_geom_torsion_site_symmetry_2
_geom_torsion_site_symmetry_3
_geom_torsion_site_symmetry_4
_geom_torsion_publ_flag
C18 C1 C2 C13 -2.6(7) . . . . ?
C13 C3 C4 C14 1.0(7) . . . . ?
C14 C5 C6 C15 -0.9(6) . . . . ?
C15 C7 C8 C16 -1.5(6) . . . . ?
C16 C9 C10 C17 2.2(6) . . . . ?
C17 C11 C12 C18 1.3(7) . . . . ?
C1 C2 C13 C3 -177.6(4) . . . . ?
C1 C2 C13 C19 2.2(6) . . . . ?
C4 C3 C13 C2 179.1(4) . . . . ?
C4 C3 C13 C19 -0.7(6) . . . . ?
C3 C4 C14 C20 -0.3(6) . . . . ?
C3 C4 C14 C5 -180.0(4) . . . . ?
C6 C5 C14 C4 -178.1(4) . . . . ?
C6 C5 C14 C20 2.2(5) . . . . ?
C5 C6 C15 C21 -1.4(6) . . . . ?
C5 C6 C15 C7 179.9(4) . . . . ?
C8 C7 C15 C6 179.4(4) . . . . ?
C8 C7 C15 C21 0.6(5) . . . . ?
C7 C8 C16 C9 -178.3(4) . . . . ?
C7 C8 C16 C22 1.5(6) . . . . ?
C10 C9 C16 C8 178.5(4) . . . . ?
C10 C9 C16 C22 -1.3(5) . . . . ?
C9 C10 C17 C11 179.1(4) . . . . ?
C9 C10 C17 C23 -1.2(6) . . . . ?
C12 C11 C17 C10 -179.7(4) . . . . ?
C12 C11 C17 C23 0.7(6) . . . . ?
C2 C1 C18 C12 179.4(4) . . . . ?
C2 C1 C18 C24 1.3(6) . . . . ?
C11 C12 C18 C1 179.0(4) . . . . ?
C11 C12 C18 C24 -3.0(6) . . . . ?
C2 C13 C19 C24 -0.6(4) . . . . ?
C3 C13 C19 C24 179.2(3) . . . . ?
C2 C13 C19 C20 179.9(3) . . . . ?
C3 C13 C19 C20 -0.3(4) . . . . ?
C4 C14 C20 C19 -0.7(4) . . . . ?
C5 C14 C20 C19 179.0(2) . . . . ?
C4 C14 C20 C21 179.0(3) . . . . ?
C5 C14 C20 C21 -1.3(4) . . . . ?
C24 C19 C20 C14 -178.5(2) . . . . ?
C13 C19 C20 C14 1.0(4) . . . . ?
C24 C19 C20 C21 1.8(4) . . . . ?
C13 C19 C20 C21 -178.8(2) . . . . ?
C6 C15 C21 C22 -178.6(3) . . . . ?
C7 C15 C21 C22 0.2(4) . . . . ?
C6 C15 C21 C20 2.3(4) . . . . ?
C7 C15 C21 C20 -178.8(3) . . . . ?
C14 C20 C21 C15 -1.0(4) . . . . ?
C19 C20 C21 C15 178.7(2) . . . . ?
C14 C20 C21 C22 180.0(2) . . . . ?
C19 C20 C21 C22 -0.3(3) . . . . ?
C8 C16 C22 C23 179.7(3) . . . . ?
C9 C16 C22 C23 -0.5(4) . . . . ?
C8 C16 C22 C21 -0.6(5) . . . . ?
C9 C16 C22 C21 179.2(3) . . . . ?
C15 C21 C22 C23 179.5(2) . . . . ?
C20 C21 C22 C23 -1.5(4) . . . . ?
C15 C21 C22 C16 -0.2(4) . . . . ?
C20 C21 C22 C16 178.8(2) . . . . ?
C16 C22 C23 C24 -178.5(2) . . . . ?
C21 C22 C23 C24 1.8(4) . . . . ?
C16 C22 C23 C17 1.4(4) . . . . ?
C21 C22 C23 C17 -178.3(2) . . . . ?
C10 C17 C23 C24 179.4(3) . . . . ?
C11 C17 C23 C24 -1.0(4) . . . . ?
C10 C17 C23 C22 -0.6(4) . . . . ?
C11 C17 C23 C22 179.1(3) . . . . ?
C22 C23 C24 C19 -0.3(4) . . . . ?
C17 C23 C24 C19 179.8(2) . . . . ?
C22 C23 C24 C18 179.3(2) . . . . ?
C17 C23 C24 C18 -0.6(4) . . . . ?
C20 C19 C24 C23 -1.5(4) . . . . ?
C13 C19 C24 C23 179.0(2) . . . . ?
C20 C19 C24 C18 178.9(2) . . . . ?
C13 C19 C24 C18 -0.6(4) . . . . ?
C1 C18 C24 C23 -179.3(3) . . . . ?
C12 C18 C24 C23 2.6(4) . . . . ?
C1 C18 C24 C19 0.3(4) . . . . ?
C12 C18 C24 C19 -177.8(3) . . . . ?
F25 C25 C26 C28 2.4(4) . . . . ?
C27 C25 C26 C28 -178.7(2) 3_665 . . . ?
F25 C25 C26 C27 -178.51(19) . . . . ?
C27 C25 C26 C27 0.4(4) 3_665 . . . ?
C28 C26 C27 F27 0.0(4) . . . . ?
C25 C26 C27 F27 -179.1(2) . . . . ?
C28 C26 C27 C25 178.7(2) . . . 3_665 ?
C25 C26 C27 C25 -0.4(4) . . . 3_665 ?
C27 C26 C28 C29 2.3(4) . . . . ?
C25 C26 C28 C29 -178.7(2) . . . . ?
C27 C26 C28 C30 -177.0(2) . . . . ?
C25 C26 C28 C30 2.0(4) . . . . ?

_refine_diff_density_max         0.717
_refine_diff_density_min         -0.366
_refine_diff_density_rms         0.057

_shelx_res_file                  
;

    mar134-260-abs.res created by SHELXL-2014/7

TITL mar134-abs in P2(1)/n
CELL 1.54178  10.6777   9.6459  19.3207  90.000  92.997  90.000
ZERR  2.00   0.0003   0.0003   0.0006   0.000   0.001   0.000
LATT 1
SYMM 0.5-X, 0.5+Y, 0.5-Z
SFAC C  H  N  F
UNIT 120  48  8  8
OMIT -3 134
L.S. 8
ACTA
BOND $H
FMAP 2
PLAN 20
SIZE 0.48 0.12 0.08
CONF
TEMP -13.000
WGHT    0.116400    1.477500
FVAR       0.11127
MOLE 1
C1    1    0.086745    0.295972    0.150759    11.00000    0.07318    0.14015 =
         0.15502    0.10067    0.04457    0.04368
AFIX  43
H1A   2    0.066626    0.261678    0.193773    11.00000   -1.20000
AFIX   0
C2    1    0.078595    0.210715    0.097424    11.00000    0.05884    0.08277 =
         0.22582    0.07972    0.05072    0.01518
AFIX  43
H2A   2    0.056676    0.118506    0.103959    11.00000   -1.20000
AFIX   0
C3    1    0.091925    0.175808   -0.030019    11.00000    0.04497    0.05887 =
         0.28779   -0.05117    0.00373   -0.00228
AFIX  43
H3A   2    0.068217    0.083573   -0.025672    11.00000   -1.20000
AFIX   0
C4    1    0.114344    0.224833   -0.093974    11.00000    0.04719    0.13634 =
         0.21711   -0.12244   -0.02616    0.01972
AFIX  43
H4A   2    0.104494    0.166354   -0.132140    11.00000   -1.20000
AFIX   0
C5    1    0.178726    0.425513   -0.170793    11.00000    0.05857    0.23251 =
         0.06653   -0.07707   -0.01878    0.05789
AFIX  43
H5A   2    0.168499    0.374387   -0.211506    11.00000   -1.20000
AFIX   0
C6    1    0.218953    0.561456   -0.172583    11.00000    0.06830    0.24851 =
         0.04999    0.00730    0.00148    0.06509
AFIX  43
H6A   2    0.236227    0.598316   -0.215529    11.00000   -1.20000
AFIX   0
C7    1    0.277930    0.788113   -0.120125    11.00000    0.07183    0.12093 =
         0.11170    0.07964    0.03382    0.02505
AFIX  43
H7A   2    0.296839    0.827500   -0.162257    11.00000   -1.20000
AFIX   0
C8    1    0.290014    0.864780   -0.059293    11.00000    0.06803    0.10243 =
         0.17818    0.07119    0.03210    0.02198
AFIX  43
H8A   2    0.319319    0.955335   -0.061834    11.00000   -1.20000
AFIX   0
C9    1    0.271030    0.895525    0.065183    11.00000    0.05622    0.05768 =
         0.17123   -0.04503   -0.00290    0.00500
AFIX  43
H9A   2    0.300032    0.986237    0.062897    11.00000   -1.20000
AFIX   0
C10   1    0.239394    0.844764    0.127015    11.00000    0.05952    0.12367 =
         0.14793   -0.07437   -0.01357    0.01246
AFIX  43
H10A  2    0.244407    0.902210    0.165719    11.00000   -1.20000
AFIX   0
C11   1    0.168198    0.653271    0.196509    11.00000    0.06304    0.19752 =
         0.04860   -0.02279   -0.00856    0.03400
AFIX  43
H11A  2    0.173482    0.709292    0.235728    11.00000   -1.20000
AFIX   0
C12   1    0.130302    0.522308    0.203778    11.00000    0.07122    0.21291 =
         0.05381    0.02653    0.01010    0.05018
AFIX  43
H12A  2    0.108504    0.490446    0.246957    11.00000   -1.20000
AFIX   0
C13   1    0.102989    0.258684    0.030356    11.00000    0.03674    0.05884 =
         0.16861    0.01931    0.01581    0.00620
C14   1    0.152035    0.361975   -0.103338    11.00000    0.04249    0.14132 =
         0.09304   -0.06834   -0.01640    0.03071
C15   1    0.235095    0.644818   -0.116828    11.00000    0.05635    0.15051 =
         0.06279    0.04270    0.01745    0.04072
C16   1    0.261550    0.815114    0.003425    11.00000    0.04976    0.06831 =
         0.13060    0.01404    0.01287    0.01000
C17   1    0.200155    0.710797    0.134002    11.00000    0.04489    0.11041 =
         0.09494   -0.02718   -0.00957    0.02235
C18   1    0.123312    0.433233    0.146873    11.00000    0.05176    0.13218 =
         0.07279    0.03137    0.01418    0.03601
C19   1    0.140683    0.398551    0.021831    11.00000    0.03003    0.05108 =
         0.07491    0.01110    0.00626    0.00702
C20   1    0.165662    0.448253   -0.044779    11.00000    0.03100    0.06526 =
         0.05540   -0.01126   -0.00218    0.01254
C21   1    0.206183    0.589621   -0.051838    11.00000    0.03468    0.07872 =
         0.05574    0.02659    0.00828    0.01878
C22   1    0.219237    0.675156    0.008483    11.00000    0.03421    0.04082 =
         0.09385    0.00039    0.00027    0.00828
C23   1    0.189991    0.622317    0.073296    11.00000    0.03804    0.07285 =
         0.05397   -0.00940   -0.00186    0.01328
C24   1    0.151742    0.486501    0.079628    11.00000    0.03732    0.07655 =
         0.05075    0.01087    0.00453    0.01729
C25   1    0.467233    0.421082    0.055934    11.00000    0.03584    0.06035 =
         0.03778    0.00206    0.00451    0.00127
F25   4    0.433150    0.345305    0.109321    11.00000    0.05996    0.06696 =
         0.04212    0.00427    0.00872   -0.00488
C26   1    0.507851    0.561570    0.068847    11.00000    0.03114    0.05942 =
         0.03892   -0.00321    0.00171    0.00323
C27   1    0.539617    0.635796    0.007695    11.00000    0.03335    0.05489 =
         0.04533   -0.00337    0.00125    0.00022
F27   4    0.579756    0.765715    0.014381    11.00000    0.06005    0.05549 =
         0.05257   -0.00478    0.00429   -0.00802
C28   1    0.517245    0.619134    0.134177    11.00000    0.03897    0.06487 =
         0.04167   -0.00497    0.00343    0.00304
C29   1    0.554852    0.758998    0.147981    11.00000    0.04987    0.07233 =
         0.04037   -0.00952    0.00310    0.00007
N29   3    0.583614    0.869494    0.163936    11.00000    0.08298    0.07811 =
         0.05481   -0.01406    0.00532   -0.00934
C30   1    0.491594    0.544838    0.196171    11.00000    0.05518    0.07162 =
         0.04224   -0.00796    0.00835    0.00170
N30   3    0.476036    0.493743    0.248191    11.00000    0.09645    0.09069 =
         0.04781   -0.00257    0.01856   -0.00238
HKLF 4

REM  mar134-abs in P2(1)/n
REM R1 =  0.0800 for    3108 Fo > 4sig(Fo)  and  0.0861 for all    3524 data
REM    307 parameters refined using      0 restraints

END

WGHT      0.1171      1.4827

REM Highest difference peak  0.717,  deepest hole -0.366,  1-sigma level  0.057
Q1    1   0.1310  0.6544  0.2784  11.00000  0.05    0.72
Q2    1   0.2475  0.7076 -0.1673  11.00000  0.05    0.49
Q3    1   0.2350  0.7785  0.0843  11.00000  0.05    0.45
Q4    1   0.1468  0.3210 -0.1715  11.00000  0.05    0.44
Q5    1   0.2826  0.9097  0.0047  11.00000  0.05    0.42
Q6    1   0.2554  0.7804 -0.0513  11.00000  0.05    0.41
Q7    1   0.1623  0.5239  0.1405  11.00000  0.05    0.32
Q8    1   0.1282  0.4180  0.1793  11.00000  0.05    0.32
Q9    1   0.1836  0.4589 -0.1923  11.00000  0.05    0.30
Q10   1   0.2043  0.5662 -0.1426  11.00000  0.05    0.29
Q11   1   0.1204  0.3717  0.1188  11.00000  0.05    0.27
Q12   1   0.2186  0.7506  0.1685  11.00000  0.05    0.27
Q13   1   0.0798  0.1928  0.0423  11.00000  0.05    0.22
Q14   1   0.1534  0.4364  0.0523  11.00000  0.05    0.21
Q15   1   0.1891  0.5481  0.0683  11.00000  0.05    0.20
Q16   1   0.2111  0.6437  0.0315  11.00000  0.05    0.20
Q17   1   0.2003  0.6341  0.1434  11.00000  0.05    0.19
Q18   1   0.1461  0.4230 -0.0133  11.00000  0.05    0.18
Q19   1   0.2204  0.6744 -0.0424  11.00000  0.05    0.17
Q20   1   0.1068  0.2489 -0.0147  11.00000  0.05    0.17
;
_shelx_res_checksum              61819

_shelx_hkl_file                  
;
   2   0   0   20.98    0.43
   2   0   0   21.62    0.45
   2   0   0   20.86    0.47
   2   0   0   21.69    0.48
  -2   0   0   21.09    0.49
   2   0   0   21.40    0.44
   3   0   0   -0.01    0.00
   3   0   0   -0.01    0.01
   3   0   0   -0.01    0.01
   3   0   0    0.00    0.01
   3   0   0    0.00    0.01
  -3   0   0   -0.01    0.01
   4   0   0    7.01    0.15
   4   0   0    6.98    0.16
   4   0   0    6.73    0.15
   4   0   0    7.26    0.16
   4   0   0    6.90    0.14
   5   0   0    0.01    0.01
   5   0   0    0.00    0.01
   5   0   0    0.00    0.00
   5   0   0    0.00    0.01
   5   0   0   -0.01    0.01
   6   0   0    7.54    0.18
   6   0   0    7.57    0.16
   6   0   0    7.15    0.16
   6   0   0    7.52    0.17
   7   0   0    0.00    0.01
   7   0   0    0.00    0.01
   8   0   0    0.02    0.01
   8   0   0    0.03    0.01
  -9   0   0   -0.01    0.01
  -9   0   0    0.00    0.01
   9   0   0    0.00    0.01
  10   0   0    0.22    0.02
 -10   0   0    0.22    0.02
 -10   0   0    0.21    0.01
 -11   0   0    0.00    0.01
 -11   0   0    0.00    0.01
 -11   0   0    0.00    0.00
  11   0   0   -0.01    0.01
  12   0   0    0.09    0.01
 -12   0   0    0.08    0.01
 -12   0   0    0.09    0.01
 -12   0   0    0.08    0.01
   1  -1   0    1.03    0.02
   1  -1   0    1.01    0.02
  -1  -1   0    1.01    0.02
  -1   1   0    1.05    0.03
   1   1   0    0.99    0.02
   2  -1   0    4.42    0.09
  -2  -1   0    4.46    0.10
   2  -1   0    4.52    0.09
   2  -1   0    4.45    0.10
  -2  -1   0    4.43    0.09
   2  -1   0    4.36    0.09
   2   1   0    4.45    0.10
   2   1   0    4.45    0.09
  -2   1   0    4.50    0.10
   2   1   0    4.45    0.10
   3  -1   0  661.58   13.76
   3  -1   0  614.51   13.44
  -3  -1   0  680.46   13.48
   3  -1   0  659.09   14.57
   3  -1   0  628.23   13.99
  -3  -1   0  655.05   14.02
   3   1   0  638.16   15.12
  -3   1   0  681.49   15.39
   3   1   0  681.97   13.74
   3   1   0  659.23   13.47
   3   1   0  683.98   14.54
   3   1   0  655.87   14.01
   4  -1   0    5.43    0.12
   4  -1   0    5.68    0.13
   4  -1   0    5.47    0.13
  -4  -1   0    5.42    0.11
   4  -1   0    5.56    0.11
   4  -1   0    5.36    0.12
   4   1   0    5.31    0.12
   4   1   0    5.54    0.13
   4   1   0    5.36    0.12
   4   1   0    5.55    0.11
   4   1   0    5.69    0.12
  -4   1   0    5.71    0.13
   5  -1   0    2.38    0.05
   5  -1   0    2.32    0.06
   5  -1   0    2.37    0.06
   5  -1   0    2.42    0.06
   5  -1   0    2.18    0.05
   5   1   0    2.34    0.06
   5   1   0    2.35    0.06
   5   1   0    2.36    0.05
   6  -1   0   66.59    1.43
   6  -1   0   65.10    1.33
   6  -1   0   67.02    1.56
   6  -1   0   64.53    1.49
   6   1   0   64.51    1.49
   6   1   0   63.40    1.43
   7  -1   0    1.82    0.05
   7  -1   0    1.81    0.05
   7  -1   0    1.81    0.04
   7   1   0    1.78    0.05
   7   1   0    1.81    0.05
   8  -1   0    0.71    0.02
   8  -1   0    0.74    0.03
   8  -1   0    0.75    0.03
   8   1   0    0.75    0.03
   8   1   0    0.75    0.02
  -8   1   0    0.71    0.02
  -8   1   0    0.75    0.02
 -10  -1   0    0.09    0.01
 -10  -1   0    0.08    0.01
  10  -1   0    0.09    0.01
 -10   1   0    0.06    0.01
 -10   1   0    0.09    0.01
 -10   1   0    0.08    0.01
  10   1   0    0.08    0.01
 -11  -1   0    0.93    0.02
  11  -1   0    0.95    0.03
 -11   1   0    0.97    0.02
 -11   1   0    1.01    0.03
  11   1   0    0.98    0.02
  12  -1   0    0.01    0.01
 -12  -1   0    0.01    0.00
 -12  -1   0    0.00    0.00
 -12   1   0    0.00    0.00
 -12   1   0    0.01    0.01
 -12   1   0    0.01    0.00
   0  -2   0   35.88    0.76
   0  -2   0   37.62    0.75
   0   2   0   35.21    0.83
   1  -2   0   12.17    0.24
  -1  -2   0   11.77    0.24
   1  -2   0   11.84    0.25
   1  -2   0   12.05    0.25
  -1  -2   0   11.44    0.25
   1   2   0   11.95    0.26
   1   2   0   11.61    0.27
  -1   2   0   11.82    0.27
  -2  -2   0    1.68    0.04
   2  -2   0    1.79    0.04
   2  -2   0    1.80    0.04
   2  -2   0    1.75    0.04
   2  -2   0    1.74    0.04
  -2  -2   0    1.72    0.04
   2   2   0    1.77    0.04
  -2   2   0    1.66    0.04
   2   2   0    1.81    0.04
  -3  -2   0    4.09    0.09
   3  -2   0    4.38    0.09
  -3  -2   0    4.31    0.09
   3  -2   0    4.40    0.10
   3  -2   0    4.33    0.09
   3  -2   0    4.23    0.09
  -3   2   0    4.29    0.10
   3   2   0    4.45    0.10
   3   2   0    4.12    0.10
   4  -2   0    4.70    0.10
   4  -2   0    4.69    0.11
   4  -2   0    4.75    0.10
  -4  -2   0    4.74    0.10
   4  -2   0    4.58    0.10
  -4  -2   0    4.66    0.10
   4   2   0    4.57    0.11
  -4   2   0    4.70    0.11
   4   2   0    4.74    0.11
   5  -2   0    0.54    0.02
   5  -2   0    0.53    0.02
   5  -2   0    0.56    0.02
   5  -2   0    0.53    0.02
   5  -2   0    0.53    0.02
   5   2   0    0.57    0.02
   5   2   0    0.56    0.02
   6  -2   0  104.43    2.21
   6  -2   0  106.59    2.29
   6  -2   0  103.92    2.38
   6  -2   0  104.08    2.12
   6   2   0  105.44    2.38
   6   2   0  102.20    2.27
   7  -2   0    1.90    0.05
   7  -2   0    1.87    0.05
   7  -2   0    1.92    0.05
   7  -2   0    1.86    0.05
   7   2   0    1.89    0.05
  -8  -2   0    2.52    0.05
   8  -2   0    2.56    0.07
   8  -2   0    2.49    0.07
   8   2   0    2.55    0.07
  -8   2   0    2.51    0.05
   8   2   0    2.56    0.05
  -8   2   0    2.58    0.06
   9  -2   0   14.81    0.27
  -9   2   0   14.35    0.26
   9   2   0   14.41    0.27
  -9   2   0   14.34    0.27
  -9   2   0   14.48    0.26
  10  -2   0    0.24    0.02
  10   2   0    0.25    0.01
 -10   2   0    0.25    0.01
 -10   2   0    0.26    0.01
 -11  -2   0    0.23    0.01
  11  -2   0    0.22    0.01
 -11   2   0    0.22    0.01
 -11   2   0    0.21    0.01
 -11   2   0    0.23    0.01
 -12  -2   0    0.01    0.01
  12  -2   0    0.02    0.01
 -12  -2   0    0.02    0.00
 -12   2   0    0.02    0.00
 -12   2   0    0.02    0.01
   0  -3   0    0.00    0.00
   0  -3   0    0.00    0.00
   0   3   0    0.00    0.01
   0   3   0    0.01    0.00
  -1  -3   0    0.05    0.01
   1  -3   0    0.06    0.01
   1  -3   0    0.05    0.00
   1  -3   0    0.05    0.01
  -1  -3   0    0.05    0.01
  -1   3   0    0.08    0.01
   1   3   0    0.05    0.01
   2  -3   0    0.08    0.01
  -2  -3   0    0.06    0.01
   2  -3   0    0.08    0.01
  -2  -3   0    0.06    0.01
   2  -3   0    0.08    0.01
  -2   3   0    0.07    0.01
   2   3   0    0.07    0.01
   2   3   0    0.07    0.01
   3  -3   0    4.10    0.09
  -3  -3   0    4.24    0.09
   3  -3   0    4.30    0.10
   3  -3   0    4.43    0.09
   3  -3   0    4.29    0.09
  -3  -3   0    4.26    0.09
  -3   3   0    4.18    0.10
   3   3   0    4.24    0.10
   3   3   0    4.41    0.10
   4  -3   0   10.87    0.23
  -4  -3   0   10.67    0.23
   4  -3   0   10.57    0.23
  -4  -3   0   10.74    0.22
   4  -3   0   10.89    0.24
   4  -3   0   11.00    0.22
   4   3   0   10.51    0.25
   4   3   0   10.89    0.24
  -4   3   0   10.80    0.25
   5  -3   0   22.56    0.49
   5  -3   0   22.68    0.47
   5  -3   0   22.57    0.47
   5  -3   0   21.58    0.46
   5   3   0   22.39    0.51
   5   3   0   22.88    0.49
   6  -3   0    3.25    0.08
   6  -3   0    3.25    0.08
   6  -3   0    3.26    0.09
   6  -3   0    3.24    0.07
   6   3   0    3.27    0.08
   6   3   0    3.25    0.08
   7  -3   0    0.63    0.02
  -7  -3   0    0.60    0.02
   7  -3   0    0.61    0.03
   7  -3   0    0.63    0.02
   7  -3   0    0.63    0.03
  -7   3   0    0.62    0.02
   7   3   0    0.59    0.02
   8  -3   0    1.14    0.04
   8  -3   0    1.16    0.03
   8  -3   0    1.13    0.04
  -8  -3   0    1.14    0.03
  -8   3   0    1.16    0.02
  -8   3   0    1.17    0.03
  -8   3   0    1.13    0.03
   8   3   0    1.20    0.04
   8   3   0    1.14    0.03
   9  -3   0    3.51    0.07
  -9   3   0    3.61    0.07
  -9   3   0    3.72    0.08
  -9   3   0    3.57    0.08
  10  -3   0    1.19    0.03
 -10   3   0    1.17    0.03
 -10   3   0    1.14    0.03
 -10   3   0    1.18    0.03
  11  -3   0    0.07    0.01
 -11  -3   0    0.06    0.01
 -11   3   0    0.06    0.01
 -11   3   0    0.05    0.01
 -12  -3   0    1.34    0.03
  12  -3   0    1.26    0.03
 -12   3   0    1.36    0.03
 -12   3   0    1.33    0.03
   0  -4   0   16.87    0.36
   0  -4   0   17.46    0.35
   0  -4   0   16.96    0.36
   0   4   0   17.05    0.39
  -1  -4   0    8.97    0.18
   1  -4   0    8.92    0.19
   1  -4   0    8.99    0.18
   1  -4   0    8.91    0.19
  -1  -4   0    8.74    0.19
   1   4   0    8.65    0.21
  -1   4   0    8.77    0.21
   2  -4   0   17.34    0.34
   2  -4   0   17.10    0.35
  -2  -4   0   16.68    0.36
   2  -4   0   16.85    0.36
  -2  -4   0   17.30    0.35
   2   4   0   16.74    0.39
  -2   4   0   16.70    0.39
   3  -4   0   10.61    0.23
   3  -4   0   10.93    0.22
   3  -4   0   10.90    0.24
  -3  -4   0   10.79    0.23
   3  -4   0   10.58    0.23
  -3  -4   0   10.71    0.22
   3   4   0   10.43    0.25
   3   4   0   11.14    0.24
  -3   4   0   10.42    0.25
   4  -4   0   10.01    0.21
  -4  -4   0   10.45    0.21
   4  -4   0   10.03    0.22
   4  -4   0   10.24    0.23
   4  -4   0   10.32    0.22
  -4  -4   0   10.30    0.22
   4   4   0   10.50    0.24
  -4   4   0   10.45    0.24
   4   4   0   10.38    0.23
   5  -4   0    3.06    0.08
   5  -4   0    3.07    0.07
   5  -4   0    3.13    0.07
   5  -4   0    3.15    0.07
   5   4   0    3.10    0.08
   5   4   0    3.03    0.08
   6  -4   0    0.59    0.02
   6  -4   0    0.59    0.02
   6  -4   0    0.57    0.03
   6  -4   0    0.60    0.03
   6   4   0    0.63    0.02
   7  -4   0    0.79    0.03
   7  -4   0    0.88    0.03
   7  -4   0    0.84    0.03
   7  -4   0    0.88    0.03
  -7   4   0    0.87    0.02
  -7   4   0    0.84    0.03
   7   4   0    0.88    0.03
  -7   4   0    0.90    0.03
  -7   4   0    0.81    0.03
  -7   4   0    0.84    0.02
  -8  -4   0    0.01    0.01
  -8   4   0    0.01    0.00
  -8   4   0    0.02    0.01
  -8   4   0    0.02    0.01
  -8   4   0    0.02    0.01
  -9  -4   0    0.00    0.00
  -9   4   0    0.00    0.01
  -9   4   0    0.00    0.00
  -9   4   0   -0.01    0.01
  10  -4   0    0.39    0.02
 -10   4   0    0.43    0.02
 -10   4   0    0.42    0.02
  11  -4   0    0.02    0.01
 -11  -4   0    0.03    0.01
 -11   4   0    0.03    0.01
  11   4   0    0.03    0.01
 -11   4   0    0.04    0.01
 -12   4   0    0.14    0.01
   0  -5   0   -0.01    0.01
   0  -5   0    0.00    0.01
   0  -5   0    0.00    0.01
  -1  -5   0    0.01    0.01
  -1  -5   0    0.00    0.01
   1  -5   0    0.01    0.01
   1  -5   0    0.00    0.01
  -1  -5   0    0.02    0.01
   1  -5   0    0.01    0.01
   1   5   0    0.00    0.01
  -2  -5   0    7.12    0.16
  -2  -5   0    7.08    0.15
   2  -5   0    7.23    0.16
   2  -5   0    7.21    0.15
   2  -5   0    7.23    0.15
   2   5   0    7.29    0.17
   3  -5   0    4.21    0.10
   3  -5   0    4.17    0.09
  -3  -5   0    4.29    0.09
   3  -5   0    4.15    0.09
  -3  -5   0    4.21    0.09
   3  -5   0    4.20    0.09
   3   5   0    4.16    0.10
  -4  -5   0    0.02    0.01
   4  -5   0    0.03    0.01
  -4  -5   0    0.02    0.01
   4  -5   0    0.03    0.01
   4  -5   0    0.01    0.01
   4  -5   0    0.02    0.01
   4   5   0    0.02    0.01
   5  -5   0    0.68    0.02
   5  -5   0    0.63    0.02
   5  -5   0    0.67    0.02
   5  -5   0    0.68    0.03
   5   5   0    0.69    0.02
   5   5   0    0.68    0.03
   6  -5   0    0.02    0.01
   6  -5   0    0.00    0.01
   6  -5   0    0.01    0.01
   6   5   0    0.01    0.01
   6   5   0    0.00    0.01
  -6   5   0    0.03    0.01
  -6   5   0    0.01    0.00
  -6   5   0    0.01    0.01
   6   5   0    0.01    0.01
   7   5   0    0.05    0.01
  -7   5   0    0.05    0.01
  -7   5   0    0.05    0.00
  -7   5   0    0.05    0.01
  -7   5   0    0.04    0.01
  -8  -5   0    0.05    0.01
  -8   5   0    0.04    0.01
  -8   5   0    0.05    0.01
  -8   5   0    0.07    0.01
   8   5   0    0.03    0.01
  -9  -5   0    0.01    0.01
  -9   5   0    0.01    0.01
  -9   5   0    0.01    0.01
  -9   5   0    0.00    0.01
   9   5   0    0.00    0.01
  10  -5   0    0.00    0.01
  10   5   0   -0.01    0.01
 -10   5   0    0.00    0.01
 -10   5   0    0.01    0.01
  11  -5   0    0.02    0.01
 -11   5   0    0.02    0.01
  11   5   0    0.03    0.01
 -11   5   0    0.03    0.01
   0  -6   0    0.59    0.02
   0  -6   0    0.54    0.02
   0  -6   0    0.61    0.02
   1  -6   0    0.24    0.01
  -1  -6   0    0.25    0.01
  -1  -6   0    0.23    0.02
  -1  -6   0    0.24    0.01
   1  -6   0    0.25    0.01
   1  -6   0    0.23    0.02
   1   6   0    0.26    0.02
  -2  -6   0    1.97    0.05
  -2  -6   0    1.88    0.05
   2  -6   0    1.91    0.04
   2  -6   0    1.92    0.05
   2  -6   0    1.93    0.05
  -2  -6   0    1.94    0.05
   2   6   0    2.01    0.05
   3  -6   0    2.83    0.07
   3  -6   0    2.80    0.07
   3  -6   0    2.76    0.06
   3  -6   0    2.79    0.07
  -3  -6   0    2.93    0.07
  -3  -6   0    2.84    0.07
  -3  -6   0    2.77    0.07
   3   6   0    2.85    0.07
  -4  -6   0    0.47    0.02
  -4  -6   0    0.47    0.02
   4  -6   0    0.46    0.02
   4  -6   0    0.47    0.02
   4  -6   0    0.47    0.02
  -4  -6   0    0.48    0.02
   4  -6   0    0.48    0.02
   4   6   0    0.49    0.02
   4   6   0    0.49    0.02
   5  -6   0    2.02    0.05
   5  -6   0    2.10    0.06
   5  -6   0    2.11    0.05
   5  -6   0    1.95    0.05
  -5   6   0    1.99    0.05
  -5   6   0    1.98    0.05
  -5   6   0    1.98    0.05
  -5   6   0    2.08    0.05
  -5   6   0    2.07    0.05
  -5   6   0    2.00    0.05
   5   6   0    2.02    0.05
  -5   6   0    2.01    0.05
   5   6   0    2.04    0.04
  -5   6   0    2.07    0.05
   5   6   0    1.96    0.05
  -6   6   0    0.44    0.02
   6   6   0    0.41    0.02
  -6   6   0    0.44    0.02
  -6   6   0    0.45    0.02
  -6   6   0    0.45    0.02
   6   6   0    0.43    0.02
  -6   6   0    0.44    0.02
  -6   6   0    0.42    0.02
  -6   6   0    0.44    0.02
  -6   6   0    0.43    0.02
  -7   6   0    0.09    0.01
  -7   6   0    0.09    0.01
  -7   6   0    0.08    0.01
  -7   6   0    0.10    0.01
  -7   6   0    0.10    0.01
   7   6   0    0.09    0.01
  -7   6   0    0.10    0.01
  -7   6   0    0.11    0.01
  -8  -6   0    0.01    0.01
   8   6   0    0.00    0.01
  -8   6   0    0.00    0.01
  -8   6   0    0.02    0.01
  -8   6   0    0.00    0.01
  -8   6   0    0.01    0.01
  -9  -6   0    0.02    0.01
  -9   6   0    0.03    0.01
  -9   6   0    0.03    0.01
  -9   6   0    0.02    0.01
   9   6   0    0.02    0.01
  10  -6   0    0.32    0.01
  10   6   0    0.33    0.01
 -10   6   0    0.34    0.01
 -10   6   0    0.31    0.01
 -10   6   0    0.30    0.01
 -11   6   0    0.02    0.00
   0  -7   0    0.00    0.01
   0  -7   0    0.00    0.01
   0  -7   0    0.00    0.01
   1  -7   0    1.08    0.03
   1  -7   0    1.07    0.03
   1  -7   0    1.10    0.03
  -1  -7   0    1.10    0.03
  -1  -7   0    1.09    0.03
  -1  -7   0    1.11    0.03
   2  -7   0    0.93    0.03
  -2  -7   0    0.89    0.03
  -2  -7   0    0.92    0.03
   2  -7   0    0.92    0.03
  -2  -7   0    0.96    0.03
   2  -7   0    0.92    0.03
  -2   7   0    0.88    0.03
   2   7   0    0.89    0.03
   3  -7   0    0.01    0.01
   3  -7   0    0.03    0.01
  -3  -7   0    0.03    0.01
  -3  -7   0    0.02    0.01
   3  -7   0    0.03    0.01
   3  -7   0    0.02    0.01
  -3  -7   0    0.02    0.01
  -3   7   0    0.03    0.01
   3   7   0    0.03    0.01
  -3   7   0    0.04    0.01
  -3   7   0    0.02    0.01
   3   7   0    0.03    0.00
   3   7   0    0.03    0.01
  -3   7   0    0.03    0.01
  -3   7   0    0.03    0.01
  -3   7   0    0.04    0.01
  -3   7   0    0.03    0.01
   3   7   0    0.02    0.01
   3   7   0    0.02    0.01
  -3   7   0    0.03    0.01
   3   7   0    0.03    0.01
   4  -7   0    1.32    0.04
   4   7   0    1.37    0.03
  -4   7   0    1.36    0.03
   4   7   0    1.36    0.04
   4   7   0    1.31    0.04
  -4   7   0    1.31    0.03
  -4   7   0    1.34    0.04
  -4   7   0    1.36    0.03
  -4   7   0    1.34    0.03
   4   7   0    1.33    0.03
  -4   7   0    1.34    0.03
  -4   7   0    1.41    0.04
  -4   7   0    1.32    0.04
   4   7   0    1.32    0.04
  -5   7   0    0.13    0.01
   5   7   0    0.11    0.01
  -5   7   0    0.12    0.01
   5   7   0    0.13    0.01
  -5   7   0    0.12    0.01
   5   7   0    0.12    0.01
  -5   7   0    0.13    0.01
   5   7   0    0.09    0.01
  -5   7   0    0.14    0.01
  -5   7   0    0.11    0.01
  -5   7   0    0.13    0.01
  -5   7   0    0.11    0.01
  -6   7   0    0.49    0.02
  -6   7   0    0.56    0.02
  -6   7   0    0.54    0.02
  -6   7   0    0.51    0.02
  -6   7   0    0.59    0.02
   6   7   0    0.57    0.02
  -6   7   0    0.54    0.02
  -6   7   0    0.56    0.02
   6   7   0    0.55    0.02
   6   7   0    0.49    0.02
  -6   7   0    0.57    0.02
  -7   7   0    1.30    0.03
  -7   7   0    1.28    0.03
   7   7   0    1.29    0.03
  -7   7   0    1.27    0.03
  -7   7   0    1.23    0.03
  -7   7   0    1.25    0.04
   7   7   0    1.26    0.03
  -7   7   0    1.25    0.03
  -7   7   0    1.29    0.03
  -7   7   0    1.22    0.03
  -8  -7   0    0.05    0.01
  -8   7   0    0.04    0.01
   8   7   0    0.05    0.01
  -8   7   0    0.06    0.01
  -8   7   0    0.06    0.01
  -8   7   0    0.05    0.01
  -8   7   0    0.05    0.01
   8   7   0    0.05    0.01
  -9   7   0    0.08    0.01
   9   7   0    0.10    0.01
  -9   7   0    0.10    0.01
  -9   7   0    0.09    0.01
 -10   7   0    0.23    0.01
  10   7   0    0.23    0.01
 -10   7   0    0.22    0.01
   0   8   0    0.89    0.03
   0   8   0    0.91    0.03
   0   8   0    0.89    0.03
   0   8   0    0.89    0.03
   0   8   0    0.90    0.03
   0   8   0    0.87    0.03
   1   8   0    0.03    0.01
   1   8   0    0.03    0.00
   1   8   0    0.05    0.01
   1   8   0    0.03    0.00
  -1   8   0    0.05    0.01
   1   8   0    0.04    0.01
  -1   8   0    0.03    0.01
   1   8   0    0.05    0.01
  -1   8   0    0.04    0.01
   1   8   0    0.02    0.01
  -1   8   0    0.06    0.01
  -1   8   0    0.03    0.01
  -1   8   0    0.04    0.01
  -1   8   0    0.03    0.01
   1   8   0    0.03    0.01
  -2   8   0    0.87    0.03
   2   8   0    0.82    0.03
   2   8   0    0.84    0.03
   2   8   0    0.86    0.03
  -2   8   0    0.85    0.03
   2   8   0    0.88    0.02
  -2   8   0    0.88    0.03
  -2   8   0    0.87    0.03
  -2   8   0    0.86    0.03
  -2   8   0    0.85    0.03
  -2   8   0    0.89    0.03
   2   8   0    0.86    0.02
   3   8   0    0.78    0.02
  -3   8   0    0.74    0.02
   3   8   0    0.76    0.03
  -3   8   0    0.72    0.03
  -3   8   0    0.75    0.03
  -3   8   0    0.78    0.03
  -3   8   0    0.72    0.03
  -3   8   0    0.78    0.03
  -3   8   0    0.79    0.02
  -3   8   0    0.78    0.02
   3   8   0    0.78    0.03
   4   8   0    0.62    0.02
  -4   8   0    0.60    0.02
  -4   8   0    0.61    0.03
   4   8   0    0.55    0.02
  -4   8   0    0.56    0.02
  -4   8   0    0.59    0.02
  -4   8   0    0.58    0.02
  -4   8   0    0.62    0.02
  -4   8   0    0.55    0.02
   4   8   0    0.58    0.02
  -4   8   0    0.60    0.02
  -5   8   0    0.17    0.01
   5   8   0    0.16    0.01
  -5   8   0    0.16    0.01
  -5   8   0    0.16    0.02
  -5   8   0    0.16    0.01
   5   8   0    0.15    0.01
  -5   8   0    0.16    0.02
  -5   8   0    0.17    0.01
  -5   8   0    0.17    0.01
  -5   8   0    0.17    0.01
  -6   8   0    0.10    0.01
   6   8   0    0.11    0.01
  -6   8   0    0.08    0.01
  -6   8   0    0.11    0.01
  -6   8   0    0.13    0.01
  -6   8   0    0.13    0.02
  -6   8   0    0.11    0.01
  -6   8   0    0.12    0.01
   6   8   0    0.11    0.01
  -6   8   0    0.12    0.01
  -7   8   0    0.31    0.02
  -7   8   0    0.28    0.02
  -7   8   0    0.29    0.02
  -7   8   0    0.29    0.01
  -7   8   0    0.30    0.01
  -7   8   0    0.29    0.01
  -7   8   0    0.28    0.01
   7   8   0    0.28    0.01
  -8  -8   0    0.18    0.01
  -8   8   0    0.17    0.01
  -8   8   0    0.15    0.01
   8   8   0    0.18    0.01
  -8   8   0    0.16    0.01
  -8   8   0    0.18    0.01
  -8   8   0    0.19    0.01
  -9   8   0    0.30    0.01
  -9   8   0    0.31    0.01
   0   9   0    0.01    0.01
   0   9   0    0.01    0.01
   0   9   0    0.00    0.01
   0   9   0    0.01    0.01
   0   9   0    0.00    0.01
   0   9   0    0.00    0.01
  -1   9   0    1.47    0.04
  -1   9   0    1.53    0.04
   1   9   0    1.52    0.04
  -1   9   0    1.48    0.04
  -1   9   0    1.48    0.04
  -1   9   0    1.56    0.04
  -1   9   0    1.52    0.04
   1   9   0    1.48    0.04
   1   9   0    1.48    0.04
   1   9   0    1.54    0.04
   1   9   0    1.53    0.04
  -1   9   0    1.52    0.04
   1   9   0    1.59    0.04
   2  -9   0    0.78    0.03
  -2   9   0    0.81    0.02
  -2   9   0    0.83    0.02
  -2   9   0    0.80    0.03
  -2   9   0    0.87    0.03
   2   9   0    0.80    0.03
  -2   9   0    0.78    0.03
  -2   9   0    0.84    0.03
   2   9   0    0.82    0.03
   2   9   0    0.82    0.02
  -2   9   0    0.83    0.03
   3   9   0    0.00    0.01
  -3   9   0    0.00    0.01
  -3   9   0    0.00    0.01
  -3   9   0    0.00    0.01
  -3   9   0    0.00    0.01
  -3   9   0    0.00    0.01
  -3   9   0    0.00    0.01
  -3   9   0    0.01    0.01
   3   9   0    0.00    0.01
  -3   9   0    0.00    0.01
   4   9   0    1.17    0.03
   4   9   0    1.16    0.03
  -4   9   0    1.20    0.03
  -4   9   0    1.21    0.03
  -4   9   0    1.17    0.03
  -4   9   0    1.22    0.03
  -4   9   0    1.18    0.03
  -4   9   0    1.21    0.03
  -4   9   0    1.19    0.03
  -4   9   0    1.26    0.04
  -5   9   0    0.21    0.01
  -5   9   0    0.18    0.01
  -5   9   0    0.18    0.01
   5   9   0    0.19    0.01
  -5   9   0    0.19    0.02
  -5   9   0    0.20    0.02
  -5   9   0    0.22    0.01
  -5   9   0    0.19    0.01
  -5   9   0    0.19    0.01
  -6   9   0    0.05    0.01
  -6   9   0    0.05    0.01
  -6   9   0    0.04    0.01
   6   9   0    0.06    0.01
  -6   9   0    0.06    0.01
  -6   9   0    0.04    0.01
  -6   9   0    0.06    0.01
  -6   9   0    0.05    0.01
  -6   9   0    0.05    0.01
  -7   9   0    0.19    0.01
  -7   9   0    0.19    0.01
  -7   9   0    0.20    0.01
  -7   9   0    0.18    0.01
  -7   9   0    0.21    0.01
  -7   9   0    0.20    0.01
  -7   9   0    0.20    0.01
  -8   9   0    0.09    0.01
  -8   9   0    0.12    0.01
   0  10   0    0.18    0.01
   0  10   0    0.16    0.01
   0  10   0    0.20    0.01
   0  10   0    0.17    0.01
   0  10   0    0.16    0.01
   0  10   0    0.21    0.02
   1  10   0    0.02    0.01
   1  10   0    0.05    0.01
  -1  10   0    0.04    0.01
   1  10   0    0.04    0.01
   1  10   0    0.04    0.01
   1  10   0    0.04    0.01
  -1  10   0    0.04    0.01
  -1  10   0    0.04    0.01
  -1  10   0    0.04    0.01
  -1  10   0    0.03    0.01
  -1  10   0    0.03    0.01
  -2  10   0    0.77    0.02
  -2  10   0    0.78    0.02
  -2  10   0    0.76    0.02
  -2  10   0    0.76    0.02
   2  10   0    0.81    0.02
  -2  10   0    0.77    0.02
   2  10   0    0.81    0.02
   2  10   0    0.69    0.02
  -2  10   0    0.74    0.02
  -2  10   0    0.79    0.02
   3 -10   0    0.25    0.01
  -3  10   0    0.23    0.01
  -3  10   0    0.24    0.01
  -3  10   0    0.26    0.01
  -3  10   0    0.27    0.01
   3  10   0    0.25    0.01
  -3  10   0    0.24    0.01
  -3  10   0    0.25    0.01
  -3  10   0    0.26    0.01
   3  10   0    0.26    0.01
   4 -10   0    0.06    0.01
  -4  10   0    0.07    0.01
  -4  10   0    0.07    0.01
  -4  10   0    0.07    0.01
  -4  10   0    0.07    0.01
  -4  10   0    0.05    0.01
  -4  10   0    0.05    0.01
   4  10   0    0.07    0.01
  -4  10   0    0.06    0.01
   5 -10   0    0.03    0.01
  -5  10   0    0.02    0.01
  -5  10   0    0.02    0.01
  -5  10   0    0.02    0.01
  -5  10   0    0.02    0.00
  -5  10   0    0.03    0.01
  -5  10   0    0.02    0.01
  -5  10   0    0.03    0.01
   5  10   0    0.03    0.01
  -6  10   0    0.01    0.00
  -6  10   0    0.00    0.00
  -6  10   0    0.00    0.01
  -6  10   0    0.01    0.01
  -6  10   0    0.01    0.00
   0  11   0    0.00    0.00
   0  11   0    0.00    0.00
   0  11   0    0.00    0.00
   0  11   0    0.00    0.00
   1  11   0    0.03    0.01
   1  11   0    0.03    0.01
  -1  11   0    0.05    0.01
  -1  11   0    0.04    0.01
  -1  11   0    0.04    0.01
  -1  11   0    0.05    0.01
   1  11   0    0.04    0.01
  -2  11   0    0.17    0.01
  -2  11   0    0.17    0.01
  -2  11   0    0.17    0.01
   2  11   0    0.15    0.01
  -2  11   0    0.15    0.01
   2  11   0    0.16    0.01
   2  11   0    0.16    0.01
  -2  11   0    0.17    0.01
  -3  11   0    0.00    0.00
  -3  11   0    0.00    0.00
   3  11   0    0.00    0.00
  -3  11   0    0.00    0.00
  -3  11   0    0.00    0.00
  -3  11   0    0.00    0.00
  -3  11   0    0.00    0.00
  -4  11   0    0.01    0.00
  -4  11   0    0.00    0.00
  12   0  -1    0.00    0.01
 -12   0   1    0.00    0.00
 -12   0   1    0.00    0.00
 -12   0   1    0.00    0.00
 -11   0   1    0.08    0.01
  11   0  -1    0.07    0.01
 -11   0   1    0.08    0.01
 -11   0   1    0.08    0.01
  10   0  -1    0.00    0.01
 -10   0   1    0.00    0.01
 -10   0   1    0.00    0.01
  -9   0   1    0.83    0.02
  -9   0   1    0.82    0.03
   9   0  -1    0.80    0.02
  -8   0   1    0.01    0.01
   8   0  -1    0.01    0.01
  -8   0   1    0.00    0.01
   8   0  -1    0.01    0.01
   8   0  -1    0.00    0.01
   7   0  -1    3.60    0.09
   7   0  -1    3.67    0.09
   6   0  -1    0.00    0.01
   6   0  -1   -0.01    0.01
   6   0  -1    0.00    0.01
   6   0  -1    0.00    0.01
   5   0  -1    9.61    0.21
   5   0  -1   10.20    0.22
   5   0  -1    9.70    0.23
   5   0  -1    9.62    0.20
   4   0  -1    0.00    0.00
   4   0  -1    0.00    0.01
   4   0  -1    0.00    0.01
   4   0  -1    0.00    0.00
   4   0  -1    0.00    0.01
   3   0  -1  241.11    5.80
   3   0  -1  254.16    5.60
   3   0  -1  245.95    5.19
   3   0  -1  246.30    5.14
   3   0  -1  239.88    5.30
   2   0  -1    0.00    0.00
   2   0  -1    0.01    0.00
   2   0  -1   -0.01    0.00
   2   0  -1   -0.01    0.00
   2   0   1    0.00    0.00
   2   0   1    0.00    0.00
  -2   0  -1    0.00    0.00
   2   0   1    0.00    0.00
   2   0   1    0.00    0.00
  -2   0  -1    0.00    0.00
  -3   0  -1  594.49   12.92
   3   0   1  639.41   14.54
  -3   0  -1  634.88   14.67
  -3   0  -1  628.94   13.55
   3   0   1  645.88   13.20
   3   0   1  632.19   12.95
   3   0   1  628.79   13.47
   3   0   1  650.01   13.99
   4   0   1    0.00    0.01
  -4   0  -1    0.00    0.01
   4   0   1    0.00    0.01
   4   0   1   -0.01    0.00
   4   0   1    0.00    0.01
   4   0   1    0.01    0.01
   5   0   1    1.23    0.04
   5   0   1    1.24    0.03
   5   0   1    1.34    0.04
   5   0   1    1.29    0.03
   5   0   1    1.27    0.03
   6   0   1    0.00    0.01
   6   0   1    0.00    0.01
   7   0   1    3.47    0.09
   8   0   1   -0.01    0.01
   8   0   1    0.00    0.01
  -9   0  -1    0.05    0.01
   9   0   1    0.08    0.01
  -9   0  -1    0.07    0.01
 -10   0  -1    0.00    0.01
  10   0   1   -0.01    0.01
 -11   0  -1    0.18    0.01
  11   0   1    0.17    0.01
 -11   0  -1    0.17    0.01
 -12   0  -1   -0.01    0.00
 -12   0  -1    0.00    0.01
 -12   0  -1    0.00    0.00
  12  -1  -1    0.00    0.01
 -12  -1   1    0.00    0.00
 -12  -1   1    0.00    0.00
 -12   1   1    0.01    0.00
 -12   1   1    0.00    0.00
 -12   1   1    0.01    0.01
 -12   1   1    0.01    0.00
 -11  -1   1    0.42    0.02
  11  -1  -1    0.42    0.02
 -11  -1   1    0.42    0.01
  11   1  -1    0.41    0.02
 -11   1   1    0.41    0.02
 -11   1   1    0.42    0.01
 -11   1   1    0.46    0.02
 -10  -1   1    0.01    0.01
 -10  -1   1    0.01    0.01
  10  -1  -1    0.01    0.01
 -10   1   1    0.00    0.00
 -10   1   1    0.01    0.01
  10   1  -1    0.02    0.01
 -10   1   1    0.01    0.01
  -9  -1   1    1.13    0.03
   9  -1  -1    1.18    0.03
  -9  -1   1    1.19    0.03
  -9   1   1    1.09    0.03
   9   1  -1    1.16    0.03
  -9   1   1    1.17    0.03
   8  -1  -1    0.30    0.02
   8  -1  -1    0.31    0.02
   8  -1  -1    0.32    0.02
  -8  -1   1    0.30    0.02
   8   1  -1    0.30    0.02
   8   1  -1    0.31    0.02
  -8   1   1    0.30    0.02
  -8   1   1    0.32    0.01
   8   1  -1    0.32    0.02
   7  -1  -1    0.27    0.02
   7  -1  -1    0.25    0.01
   7  -1  -1    0.26    0.02
   7  -1  -1    0.25    0.02
   7   1  -1    0.25    0.02
   7   1  -1    0.23    0.02
   6  -1  -1    4.32    0.09
   6  -1  -1    4.38    0.10
   6  -1  -1    4.32    0.10
   6  -1  -1    4.33    0.11
   6   1  -1    4.33    0.11
   6   1  -1    4.44    0.10
   5  -1  -1    5.67    0.13
   5  -1  -1    5.86    0.12
   5  -1  -1    5.81    0.14
   5  -1  -1    5.88    0.13
   5   1  -1    5.83    0.13
   5   1  -1    5.87    0.12
   5   1  -1    5.81    0.13
   5   1  -1    5.78    0.14
   4  -1  -1    2.84    0.07
   4  -1  -1    3.19    0.07
   4  -1  -1    3.05    0.07
   4  -1  -1    3.08    0.07
   4  -1  -1    3.08    0.08
   4   1  -1    3.04    0.08
   4   1  -1    3.10    0.07
   4   1  -1    3.09    0.07
   4   1  -1    3.03    0.07
   3  -1  -1  362.76    7.49
  -3  -1   1  361.05    7.47
   3  -1  -1  374.86    8.12
   3  -1  -1  353.23    7.82
  -3  -1   1  355.97    7.77
   3  -1  -1  368.37    7.67
   3   1  -1  364.93    8.15
   3   1  -1  366.61    7.87
   3   1  -1  365.26    7.54
   3   1  -1  361.36    8.53
   2  -1  -1    4.39    0.09
   2  -1  -1    4.56    0.09
   2  -1  -1    4.54    0.10
   2  -1  -1    4.33    0.09
  -2  -1   1    4.52    0.09
   2   1  -1    4.60    0.09
  -2   1   1    4.34    0.11
   2   1  -1    4.49    0.10
   2   1  -1    4.55    0.10
   2   1  -1    4.36    0.10
   1  -1  -1   25.43    0.53
   1   1  -1   25.55    0.59
   1  -1   1    0.06    0.01
   1  -1   1    0.04    0.00
   1  -1   1    0.05    0.00
   1  -1   1    0.06    0.00
   1   1   1    0.05    0.00
  -1   1  -1    0.05    0.01
   2  -1   1    5.90    0.12
  -2  -1  -1    5.96    0.12
   2  -1   1    5.70    0.12
  -2  -1  -1    5.85    0.12
   2  -1   1    5.65    0.12
   2  -1   1    5.71    0.13
   2   1   1    5.85    0.13
  -2   1  -1    5.98    0.14
   2   1   1    5.86    0.12
   2   1   1    5.85    0.13
   3  -1   1  948.98   21.04
   3  -1   1  916.41   19.49
  -3  -1  -1 1000.00   20.29
  -3  -1  -1  993.18   22.06
   3  -1   1  898.71   20.25
   3  -1   1  986.51   19.95
   3   1   1  948.07   19.48
  -3   1  -1  965.60   22.20
   3   1   1  924.13   20.23
   3   1   1  995.64   21.01
   4  -1   1   -0.01    0.01
  -4  -1  -1   -0.01    0.00
   4  -1   1   -0.01    0.01
   4  -1   1   -0.01    0.01
   4  -1   1   -0.01    0.01
   4  -1   1   -0.01    0.01
  -4  -1  -1   -0.01    0.01
  -4   1  -1    0.00    0.01
   4   1   1   -0.01    0.01
   4   1   1   -0.01    0.00
   4   1   1   -0.01    0.00
   4   1   1   -0.02    0.01
   4   1   1   -0.01    0.01
   5  -1   1   11.71    0.24
   5  -1   1   11.60    0.26
   5  -1   1   11.89    0.25
   5  -1   1   11.56    0.24
   5  -1   1   11.64    0.27
   5   1   1   11.31    0.24
   5   1   1   11.67    0.26
  -5   1  -1   11.74    0.27
   5   1   1   11.74    0.27
   6  -1   1  109.42    2.40
   6  -1   1  110.96    2.49
   6  -1   1  107.97    2.29
   6  -1   1  111.41    2.22
   6   1   1  107.41    2.40
   6   1   1  108.53    2.49
   7  -1   1    0.09    0.01
   7  -1   1    0.08    0.01
   7   1   1    0.09    0.01
   8  -1   1    0.41    0.02
   8  -1   1    0.41    0.02
   8   1   1    0.39    0.02
  -8   1  -1    0.39    0.02
   8   1   1    0.42    0.02
  -8   1  -1    0.37    0.02
   9  -1   1    0.12    0.01
   9   1   1    0.11    0.01
 -10  -1  -1    0.72    0.02
  10  -1   1    0.71    0.02
 -10   1  -1    0.71    0.02
 -10   1  -1    0.66    0.02
  10   1   1    0.72    0.02
 -11  -1  -1    0.24    0.01
  11  -1   1    0.22    0.01
 -11   1  -1    0.23    0.01
 -11   1  -1    0.23    0.01
 -11   1  -1    0.21    0.01
  11   1   1    0.23    0.01
 -12  -1  -1    0.21    0.01
  12  -1   1    0.21    0.01
 -12  -1  -1    0.21    0.01
 -12  -1  -1    0.23    0.01
 -12   1  -1    0.22    0.01
 -12   1  -1    0.23    0.01
 -12   1  -1    0.21    0.01
 -12  -2   1    0.03    0.00
  12  -2  -1    0.02    0.01
 -12  -2   1    0.03    0.00
 -12  -2   1    0.03    0.01
 -12   2   1    0.03    0.01
 -12   2   1    0.03    0.01
  11  -2  -1    0.30    0.02
 -11  -2   1    0.31    0.01
 -11   2   1    0.31    0.01
 -11   2   1    0.33    0.01
 -11   2   1    0.31    0.01
 -10  -2   1    0.96    0.03
  10  -2  -1    0.94    0.03
 -10  -2   1    0.90    0.03
 -10   2   1    0.94    0.03
 -10   2   1    0.92    0.02
 -10   2   1    0.95    0.03
  10   2  -1    0.95    0.02
   9  -2  -1    0.04    0.01
  -9  -2   1    0.05    0.01
  -9   2   1    0.03    0.01
  -9   2   1    0.03    0.01
  -8  -2   1    3.47    0.08
   8  -2  -1    3.36    0.08
   8  -2  -1    3.49    0.09
   8  -2  -1    3.35    0.09
  -8   2   1    3.53    0.08
   8   2  -1    3.50    0.09
   8   2  -1    3.44    0.07
  -8   2   1    3.46    0.07
  -8   2   1    3.49    0.07
  -8   2   1    3.46    0.07
   7  -2  -1    0.70    0.03
   7  -2  -1    0.70    0.03
   7  -2  -1    0.71    0.03
   7  -2  -1    0.72    0.02
   7   2  -1    0.75    0.03
   7   2  -1    0.72    0.03
   6  -2  -1    3.79    0.09
   6  -2  -1    3.81    0.09
   6  -2  -1    3.86    0.10
   6  -2  -1    3.72    0.10
   6   2  -1    3.98    0.10
   6   2  -1    4.29    0.09
   5  -2  -1    0.01    0.01
   5  -2  -1    0.02    0.01
   5  -2  -1    0.03    0.01
   5  -2  -1    0.03    0.01
   5   2  -1    0.01    0.01
   5   2  -1    0.02    0.01
   4  -2  -1    0.07    0.01
   4  -2  -1    0.06    0.01
   4  -2  -1    0.07    0.01
   4  -2  -1    0.06    0.01
  -4  -2   1    0.07    0.01
   4   2  -1    0.06    0.01
   4   2  -1    0.07    0.01
  -3  -2   1    0.01    0.01
  -3  -2   1    0.00    0.00
  -3   2   1    0.00    0.01
  -2  -2   1   15.97    0.33
   2  -2  -1   16.41    0.35
   2  -2  -1   16.29    0.33
  -2  -2   1   16.34    0.34
   2  -2  -1   16.51    0.33
   2  -2  -1   16.55    0.34
   2   2  -1   15.51    0.37
  -2   2   1   15.77    0.37
   2   2  -1   16.19    0.35
   1  -2  -1    0.29    0.01
  -1  -2   1    0.27    0.01
  -1  -2   1    0.27    0.01
   1  -2  -1    0.29    0.01
   1   2  -1    0.28    0.01
  -1   2   1    0.28    0.01
   0  -2   1    2.01    0.04
   0  -2   1    1.96    0.04
   0  -2  -1    2.07    0.04
   0  -2   1    1.98    0.04
   0   2   1    2.04    0.05
   0   2  -1    2.00    0.05
   0   2  -1    2.07    0.05
   1  -2   1    0.96    0.02
   1  -2   1    0.94    0.02
  -1  -2  -1    0.99    0.02
  -1  -2  -1    0.95    0.02
   1  -2   1    0.96    0.02
  -1   2  -1    0.97    0.03
   1   2   1    0.95    0.02
   1   2   1    0.97    0.03
  -2  -2  -1   11.97    0.26
   2  -2   1   11.80    0.26
   2  -2   1   12.42    0.25
   2  -2   1   11.88    0.27
  -2  -2  -1   12.08    0.25
   2  -2   1   12.44    0.25
  -2   2  -1   11.96    0.28
   2   2   1   12.27    0.28
   2   2   1   12.15    0.27
   3  -2   1   42.90    0.94
   3  -2   1   43.08    0.89
   3  -2   1   41.81    0.90
  -3  -2  -1   41.28    0.87
   3  -2   1   43.49    0.86
  -3  -2  -1   42.10    0.90
   3   2   1   43.53    0.93
  -3   2  -1   42.71    1.17
   3   2   1   41.92    0.97
  -4  -2  -1    0.01    0.01
   4  -2   1    0.01    0.01
  -4  -2  -1    0.00    0.01
   4  -2   1    0.00    0.01
   4  -2   1    0.00    0.01
  -4   2  -1    0.01    0.01
   4   2   1    0.01    0.01
   4   2   1    0.01    0.01
   5  -2   1    0.22    0.01
   5  -2   1    0.20    0.01
   5  -2   1    0.19    0.01
   5  -2   1    0.22    0.01
   5  -2   1    0.19    0.01
   5   2   1    0.21    0.01
  -5   2  -1    0.19    0.01
   5   2   1    0.21    0.01
   6  -2   1  211.61    4.80
   6  -2   1  210.35    4.44
   6  -2   1  215.16    4.28
   6  -2   1  210.96    4.60
   6   2   1  209.69    4.60
   6   2   1  207.24    4.79
   7  -2   1    0.13    0.01
   7  -2   1    0.14    0.01
   7  -2   1    0.13    0.01
   7  -2   1    0.14    0.01
   7   2   1    0.11    0.01
   8  -2   1    8.88    0.17
  -8  -2  -1    8.81    0.16
  -8   2  -1    8.83    0.17
   8   2   1    8.66    0.20
  -8   2  -1    8.85    0.16
   8   2   1    8.82    0.16
   9  -2   1   19.80    0.36
  -9   2  -1   19.78    0.37
  -9   2  -1   19.95    0.36
   9   2   1   19.68    0.36
  10  -2   1    2.74    0.06
 -10   2  -1    2.90    0.06
 -10   2  -1    2.73    0.05
 -10   2  -1    2.73    0.06
 -11  -2  -1    0.44    0.02
  11  -2   1    0.44    0.02
 -11   2  -1    0.42    0.01
 -11   2  -1    0.42    0.02
 -11   2  -1    0.41    0.02
 -12  -2  -1    0.95    0.02
  12  -2   1    0.89    0.02
 -12  -2  -1    0.91    0.02
 -12   2  -1    0.89    0.02
 -12   2  -1    0.95    0.02
 -12  -3   1    0.03    0.00
  12  -3  -1    0.03    0.01
 -12   3   1    0.05    0.01
 -12   3   1    0.04    0.01
 -11  -3   1    0.00    0.01
  11  -3  -1    0.00    0.01
 -11   3   1    0.00    0.01
 -11   3   1    0.00    0.01
  10  -3  -1    0.06    0.01
 -10   3   1    0.06    0.01
 -10   3   1    0.04    0.00
 -10   3   1    0.05    0.01
   9   3  -1    0.28    0.01
  -9   3   1    0.26    0.01
  -9   3   1    0.24    0.01
  -9   3   1    0.31    0.02
   8  -3  -1    0.20    0.02
  -8  -3   1    0.17    0.01
   8  -3  -1    0.19    0.01
   8  -3  -1    0.17    0.02
  -8  -3   1    0.18    0.01
   8  -3  -1    0.22    0.02
   8   3  -1    0.19    0.01
   8   3  -1    0.21    0.01
  -8   3   1    0.19    0.01
  -8   3   1    0.21    0.01
  -8   3   1    0.20    0.01
   7  -3  -1    4.69    0.10
   7  -3  -1    4.80    0.11
   7  -3  -1    4.88    0.12
  -7  -3   1    4.67    0.09
   7  -3  -1    4.72    0.12
  -7   3   1    4.71    0.09
   7   3  -1    4.71    0.12
   7   3  -1    4.76    0.11
   7   3  -1    4.69    0.09
   6  -3  -1    5.21    0.13
   6  -3  -1    5.27    0.11
   6  -3  -1    5.48    0.12
   6  -3  -1    5.39    0.13
   6   3  -1    5.23    0.13
   6   3  -1    5.29    0.12
   5  -3  -1   13.67    0.30
   5  -3  -1   14.25    0.29
   5  -3  -1   14.51    0.32
   5  -3  -1   14.01    0.30
   5   3  -1   14.45    0.33
   5   3  -1   14.26    0.31
  -4  -3   1    0.43    0.02
  -4  -3   1    0.42    0.02
   4  -3  -1    0.44    0.01
   4  -3  -1    0.44    0.02
   4  -3  -1    0.42    0.02
   4  -3  -1    0.44    0.02
   4   3  -1    0.44    0.02
   4   3  -1    0.43    0.02
   3  -3  -1    1.25    0.03
   3  -3  -1    1.31    0.03
   3  -3  -1    1.32    0.03
   3  -3  -1    1.25    0.03
  -3  -3   1    1.28    0.03
  -3  -3   1    1.28    0.03
   3   3  -1    1.26    0.03
  -3   3   1    1.26    0.04
   3   3  -1    1.22    0.04
  -2  -3   1    0.23    0.01
  -2  -3   1    0.26    0.01
   2  -3  -1    0.27    0.01
   2  -3  -1    0.27    0.01
   2  -3  -1    0.28    0.01
   2   3  -1    0.26    0.02
   2   3  -1    0.26    0.01
  -2   3   1    0.27    0.01
  -1  -3   1    7.73    0.16
   1  -3  -1    8.17    0.17
  -1  -3   1    7.63    0.17
   1  -3  -1    8.28    0.17
   1  -3  -1    7.90    0.16
   1   3  -1    7.70    0.18
  -1   3   1    7.90    0.18
   0  -3   1    6.17    0.13
   0  -3  -1    6.51    0.13
   0  -3   1    6.18    0.13
   0  -3   1    6.23    0.13
   0  -3  -1    6.29    0.13
   0   3  -1    6.18    0.14
   0   3   1    5.88    0.14
   0   3  -1    6.23    0.14
  -1  -3  -1    3.56    0.07
  -1  -3  -1    3.44    0.07
   1  -3   1    3.58    0.07
   1  -3   1    3.34    0.07
   1  -3   1    3.44    0.07
   1   3   1    3.25    0.08
  -1   3  -1    3.33    0.08
  -2  -3  -1    8.08    0.17
  -2  -3  -1    8.12    0.17
   2  -3   1    8.01    0.17
   2  -3   1    8.38    0.17
   2  -3   1    8.42    0.17
   2   3   1    7.82    0.19
   2   3   1    8.26    0.18
  -2   3  -1    7.83    0.19
   3  -3   1    0.09    0.01
   3  -3   1    0.09    0.01
   3  -3   1    0.08    0.01
  -3  -3  -1    0.08    0.01
  -3  -3  -1    0.08    0.01
   3  -3   1    0.09    0.01
   3   3   1    0.07    0.01
   3   3   1    0.09    0.01
  -3   3  -1    0.08    0.01
   4  -3   1    3.91    0.09
  -4  -3  -1    3.99    0.09
  -4  -3  -1    4.01    0.09
   4  -3   1    4.07    0.09
   4  -3   1    4.04    0.09
   4  -3   1    3.98    0.09
  -4   3  -1    4.04    0.10
   4   3   1    4.04    0.09
   4   3   1    4.08    0.10
   5  -3   1    0.15    0.01
  -5  -3  -1    0.18    0.01
   5  -3   1    0.16    0.01
   5  -3   1    0.13    0.01
   5   3   1    0.17    0.01
   5   3   1    0.16    0.01
   6  -3   1    0.05    0.01
   6  -3   1    0.05    0.01
   6  -3   1    0.05    0.01
   6  -3   1    0.04    0.01
   6  -3   1    0.04    0.01
   6   3   1    0.03    0.01
   7  -3   1    7.39    0.16
   7  -3   1    7.61    0.18
  -7  -3  -1    7.40    0.14
   7  -3   1    7.45    0.17
   7  -3   1    7.49    0.17
   7   3   1    7.40    0.17
  -7   3  -1    7.43    0.14
  -8  -3  -1    1.94    0.04
  -8   3  -1    1.91    0.04
  -8   3  -1    1.88    0.04
  -8   3  -1    1.88    0.04
   9  -3   1   31.29    0.56
  -9  -3  -1   30.19    0.56
  -9   3  -1   31.29    0.56
  -9   3  -1   31.04    0.55
  -9   3  -1   31.41    0.57
  -9   3  -1   30.72    0.57
  10  -3   1    0.04    0.01
 -10   3  -1    0.03    0.01
 -10   3  -1    0.02    0.00
 -10   3  -1    0.02    0.01
 -11  -3  -1    0.44    0.02
  11  -3   1    0.48    0.02
 -11   3  -1    0.45    0.01
 -11   3  -1    0.43    0.01
 -11   3  -1    0.46    0.02
 -11   3  -1    0.45    0.02
 -12  -3  -1    4.27    0.08
 -12   3  -1    4.35    0.08
 -12   3  -1    4.21    0.08
 -12   4   1    0.05    0.01
 -12   4   1    0.04    0.01
  11  -4  -1    0.05    0.01
 -11  -4   1    0.04    0.01
 -11   4   1    0.04    0.01
 -11   4   1    0.04    0.01
  10  -4  -1    0.10    0.01
 -10   4   1    0.09    0.01
 -10   4   1    0.09    0.01
  -9   4   1    0.32    0.02
  -9   4   1    0.31    0.01
  -8  -4   1    0.12    0.01
  -8   4   1    0.12    0.01
  -8   4   1    0.12    0.01
  -8   4   1    0.12    0.01
  -8   4   1    0.12    0.01
  -8   4   1    0.13    0.01
   7  -4  -1    0.08    0.01
   7  -4  -1    0.08    0.01
   7  -4  -1    0.08    0.01
   7  -4  -1    0.08    0.01
  -7   4   1    0.12    0.01
  -7   4   1    0.08    0.01
  -7   4   1    0.07    0.01
  -7   4   1    0.08    0.01
   7   4  -1    0.07    0.01
  -7   4   1    0.08    0.01
  -7   4   1    0.08    0.01
   6  -4  -1    0.38    0.02
   6  -4  -1    0.33    0.02
   6  -4  -1    0.36    0.02
   6  -4  -1    0.37    0.02
   6   4  -1    0.36    0.02
   6   4  -1    0.35    0.02
   5  -4  -1    0.36    0.01
   5  -4  -1    0.34    0.02
   5  -4  -1    0.35    0.02
   5  -4  -1    0.35    0.02
   5   4  -1    0.35    0.02
   4  -4  -1    1.03    0.03
  -4  -4   1    1.02    0.03
   4  -4  -1    1.05    0.03
   4  -4  -1    0.99    0.03
  -4  -4   1    1.07    0.03
   4  -4  -1    1.05    0.03
   4   4  -1    1.08    0.03
   4   4  -1    1.00    0.03
   3  -4  -1    9.76    0.21
   3  -4  -1   10.14    0.23
  -3  -4   1   10.03    0.22
   3  -4  -1   10.09    0.21
  -3  -4   1   10.05    0.21
   3  -4  -1   10.32    0.21
   3   4  -1   10.40    0.22
   3   4  -1   10.06    0.24
   2  -4  -1   47.53    0.97
  -2  -4   1   46.31    0.98
   2  -4  -1   45.90    0.94
   2  -4  -1   47.55    0.98
  -2  -4   1   46.35    0.95
   2   4  -1   45.42    1.07
   1  -4  -1    9.56    0.20
  -1  -4   1    9.61    0.21
  -1  -4   1    9.57    0.21
   1  -4  -1    9.95    0.21
   1  -4  -1   10.05    0.21
  -1  -4   1    9.77    0.20
   1   4  -1    9.85    0.23
   0  -4   1    1.28    0.03
   0  -4  -1    1.27    0.03
   0  -4   1    1.28    0.03
   0  -4   1    1.23    0.03
   0  -4  -1    1.28    0.03
   0   4  -1    1.27    0.04
   0   4   1    1.17    0.03
   1  -4   1    2.20    0.05
   1  -4   1    2.22    0.05
   1  -4   1    2.22    0.05
  -1  -4  -1    2.23    0.05
  -1  -4  -1    2.26    0.05
  -1   4  -1    2.09    0.05
   1   4   1    2.16    0.06
   2  -4   1    0.14    0.01
   2  -4   1    0.17    0.01
   2  -4   1    0.17    0.01
  -2   4  -1    0.20    0.01
   3  -4   1    1.18    0.03
   3  -4   1    1.17    0.03
  -3  -4  -1    1.21    0.03
   3  -4   1    1.20    0.03
   3  -4   1    1.14    0.03
  -3  -4  -1    1.18    0.03
  -3   4  -1    1.09    0.03
   3   4   1    1.12    0.03
   3   4   1    1.19    0.03
  -4  -4  -1    2.73    0.06
   4  -4   1    2.72    0.06
   4  -4   1    2.78    0.06
   4  -4   1    2.63    0.07
  -4  -4  -1    2.75    0.06
   4  -4   1    2.61    0.06
   4   4   1    2.77    0.07
   4   4   1    2.72    0.07
  -4   4  -1    2.66    0.07
   5  -4   1    0.00    0.01
  -5  -4  -1    0.00    0.01
   5  -4   1    0.01    0.01
   5  -4   1   -0.01    0.01
   5  -4   1    0.00    0.01
  -5   4  -1    0.01    0.01
   5   4   1    0.00    0.01
   5   4   1    0.02    0.01
   6  -4   1    0.09    0.01
   6  -4   1    0.10    0.01
   6  -4   1    0.10    0.01
   6  -4   1    0.09    0.01
   6  -4   1    0.10    0.01
   6   4   1    0.09    0.01
   7  -4   1    0.02    0.01
   7  -4   1    0.01    0.01
   7  -4   1    0.01    0.01
   7  -4   1    0.02    0.01
  -7   4  -1    0.00    0.00
  -7   4  -1    0.00    0.01
   7   4   1    0.00    0.01
  -7   4  -1    0.00    0.01
  -7   4  -1    0.00    0.00
  -7   4  -1    0.01    0.01
   7   4   1    0.01    0.01
  -8  -4  -1    0.77    0.02
  -8   4  -1    0.80    0.03
  -8   4  -1    0.80    0.02
  -8   4  -1    0.75    0.03
  -8   4  -1    0.76    0.02
   9  -4   1    0.08    0.01
  -9  -4  -1    0.07    0.01
  -9   4  -1    0.08    0.01
  -9   4  -1    0.07    0.01
  -9   4  -1    0.08    0.01
  10  -4   1    0.10    0.01
 -10   4  -1    0.12    0.01
 -10   4  -1    0.10    0.01
  10   4   1    0.11    0.01
  11  -4   1    0.06    0.01
  11   4   1    0.05    0.01
 -11   4  -1    0.06    0.01
 -11   4  -1    0.06    0.01
  11  -5  -1    0.00    0.01
 -11  -5   1    0.00    0.01
  11   5  -1    0.00    0.01
 -11   5   1    0.00    0.00
 -11   5   1    0.00    0.00
  10  -5  -1    0.08    0.01
  10   5  -1    0.09    0.01
 -10   5   1    0.08    0.01
 -10   5   1    0.08    0.01
   9   5  -1    0.00    0.01
  -9   5   1    0.02    0.01
  -9   5   1    0.01    0.01
  -9   5   1    0.01    0.01
  -8  -5   1    0.19    0.01
  -8   5   1    0.20    0.02
  -8   5   1    0.19    0.02
  -8   5   1    0.18    0.01
  -8   5   1    0.19    0.01
  -7   5   1    0.28    0.01
  -7   5   1    0.26    0.02
  -7   5   1    0.28    0.01
  -7   5   1    0.26    0.02
  -7   5   1    0.27    0.01
  -7   5   1    0.26    0.01
   6  -5  -1    0.58    0.02
   6  -5  -1    0.47    0.02
   6  -5  -1    0.47    0.02
   6   5  -1    0.46    0.02
   6   5  -1    0.45    0.02
  -6   5   1    0.43    0.02
   6   5  -1    0.45    0.02
  -6   5   1    0.45    0.01
  -6   5   1    0.47    0.02
  -6   5   1    0.46    0.02
   5  -5  -1    0.02    0.01
   5  -5  -1    0.02    0.01
   5  -5  -1    0.02    0.01
   5  -5  -1    0.02    0.01
   5   5  -1    0.02    0.01
   5   5  -1    0.02    0.01
  -4  -5   1    0.96    0.03
   4  -5  -1    0.98    0.03
   4  -5  -1    0.98    0.03
   4  -5  -1    0.91    0.03
   4  -5  -1    0.97    0.02
   4   5  -1    0.93    0.03
   3  -5  -1    1.37    0.03
  -3  -5   1    1.38    0.03
  -3  -5   1    1.40    0.04
   3  -5  -1    1.37    0.04
   3  -5  -1    1.38    0.04
   3  -5  -1    1.39    0.04
   3   5  -1    1.38    0.04
  -2  -5   1    0.69    0.02
  -2  -5   1    0.73    0.02
   2  -5  -1    0.73    0.02
   2  -5  -1    0.74    0.02
   2  -5  -1    0.74    0.02
  -2  -5   1    0.71    0.02
   2   5  -1    0.70    0.03
   1  -5  -1    2.10    0.05
   1  -5  -1    2.09    0.04
  -1  -5   1    2.00    0.05
  -1  -5   1    1.95    0.05
   1  -5  -1    2.10    0.05
  -1  -5   1    1.95    0.05
   1   5  -1    2.07    0.06
   0  -5   1   24.81    0.50
   0  -5   1   24.92    0.52
   0  -5  -1   24.66    0.51
   0  -5  -1   25.44    0.50
   0  -5  -1   24.92    0.52
   0  -5   1   24.68    0.51
   0   5  -1   23.63    0.56
  -1  -5  -1   41.10    0.81
   1  -5   1   39.25    0.81
   1  -5   1   39.47    0.85
   1  -5   1   40.70    0.83
  -1  -5  -1   39.69    0.85
   1   5   1   40.90    0.91
  -2  -5  -1    8.20    0.17
   2  -5   1    8.55    0.18
   2  -5   1    8.38    0.17
  -2  -5  -1    8.36    0.18
   2  -5   1    8.14    0.18
   2   5   1    8.62    0.20
  -2   5  -1    8.55    0.20
   3  -5   1    0.52    0.02
  -3  -5  -1    0.53    0.02
  -3  -5  -1    0.49    0.02
   3  -5   1    0.51    0.02
   3  -5   1    0.52    0.02
   3  -5   1    0.52    0.02
  -3   5  -1    0.51    0.02
   3   5   1    0.55    0.02
   4  -5   1    0.88    0.02
   4  -5   1    0.80    0.03
  -4  -5  -1    0.75    0.03
   4  -5   1    0.79    0.03
  -4  -5  -1    0.81    0.02
   4  -5   1    0.75    0.03
   4   5   1    0.80    0.03
  -4   5  -1    0.83    0.03
   4   5   1    0.80    0.03
   5  -5   1    0.03    0.01
   5  -5   1    0.06    0.01
  -5  -5  -1    0.02    0.01
   5  -5   1    0.02    0.01
   5  -5   1    0.03    0.01
   6  -5   1    0.53    0.03
   6  -5   1    0.49    0.02
   6  -5   1    0.49    0.02
   6  -5   1    0.53    0.02
   6   5   1    0.56    0.02
  -6   5  -1    0.47    0.02
   6   5   1    0.50    0.02
  -6   5  -1    0.49    0.02
  -6   5  -1    0.53    0.02
   6   5   1    0.52    0.02
  -7   5  -1    0.78    0.03
  -7   5  -1    0.81    0.02
   7   5   1    0.69    0.03
  -7   5  -1    0.79    0.02
  -7   5  -1    0.77    0.02
   7   5   1    0.81    0.02
  -7   5  -1    0.78    0.02
  -8  -5  -1    0.07    0.01
  -8   5  -1    0.08    0.01
  -8   5  -1    0.09    0.01
  -8   5  -1    0.08    0.01
  -8   5  -1    0.08    0.01
   8   5   1    0.09    0.01
  -9  -5  -1    0.06    0.01
   9  -5   1    0.06    0.01
  -9   5  -1    0.05    0.01
  -9   5  -1    0.06    0.01
  -9   5  -1    0.06    0.01
  -9   5  -1    0.07    0.01
   9   5   1    0.05    0.01
  10  -5   1    0.18    0.01
 -10   5  -1    0.19    0.01
  10   5   1    0.19    0.01
 -10   5  -1    0.19    0.01
 -11   5  -1    0.00    0.00
  11   5   1    0.00    0.00
 -11   5  -1    0.00    0.00
 -11   6   1    0.01    0.00
 -10   6   1    0.00    0.01
 -10   6   1    0.00    0.00
 -10   6   1    0.00    0.00
  10   6  -1    0.00    0.01
  -9   6   1    0.04    0.01
  -9   6   1    0.06    0.01
  -9   6   1    0.03    0.01
   9   6  -1    0.04    0.01
  -8  -6   1    0.10    0.01
  -8   6   1    0.10    0.01
  -8   6   1    0.09    0.01
  -8   6   1    0.10    0.01
   8   6  -1    0.10    0.01
  -8   6   1    0.08    0.01
  -8   6   1    0.09    0.01
  -7   6   1    0.26    0.02
  -7   6   1    0.21    0.02
  -7   6   1    0.26    0.02
  -7   6   1    0.24    0.02
   7   6  -1    0.24    0.01
  -7   6   1    0.25    0.01
  -7   6   1    0.23    0.01
  -7   6   1    0.24    0.01
  -6   6   1    0.50    0.02
  -6   6   1    0.47    0.02
  -6   6   1    0.51    0.02
   6   6  -1    0.49    0.02
   6   6  -1    0.52    0.02
  -6   6   1    0.50    0.02
  -6   6   1    0.48    0.02
  -6   6   1    0.51    0.02
  -6   6   1    0.51    0.02
  -6   6   1    0.51    0.02
   5  -6  -1    0.96    0.03
   5  -6  -1    0.96    0.03
   5  -6  -1    1.04    0.03
   5  -6  -1    1.01    0.04
  -5   6   1    0.99    0.03
  -5   6   1    1.04    0.03
   5   6  -1    0.99    0.03
   5   6  -1    1.00    0.03
  -5   6   1    0.97    0.03
  -5   6   1    0.98    0.03
  -5   6   1    0.97    0.03
   5   6  -1    0.97    0.03
  -5   6   1    1.02    0.03
   5   6  -1    0.98    0.03
  -5   6   1    1.01    0.03
  -5   6   1    0.98    0.03
   4  -6  -1    1.20    0.03
   4  -6  -1    1.26    0.04
   4  -6  -1    1.26    0.04
  -4  -6   1    1.23    0.03
   4  -6  -1    1.21    0.04
   4   6  -1    1.22    0.04
  -3  -6   1    4.07    0.09
   3  -6  -1    4.01    0.09
  -3  -6   1    4.05    0.09
   3  -6  -1    4.14    0.09
   3  -6  -1    4.08    0.10
  -3  -6   1    3.99    0.09
   3  -6  -1    3.99    0.09
   3   6  -1    4.08    0.10
   2  -6  -1    0.62    0.02
  -2  -6   1    0.64    0.02
   2  -6  -1    0.60    0.02
  -2  -6   1    0.63    0.02
   2  -6  -1    0.62    0.02
  -2  -6   1    0.62    0.02
   2   6  -1    0.64    0.02
  -1  -6   1    3.66    0.08
  -1  -6   1    3.59    0.08
   1  -6  -1    3.61    0.09
   1  -6  -1    3.63    0.08
   1  -6  -1    3.73    0.08
  -1  -6   1    3.76    0.09
   1   6  -1    3.99    0.09
   0  -6  -1    1.01    0.03
   0  -6  -1    1.00    0.03
   0  -6   1    0.99    0.03
   0  -6   1    0.98    0.03
   0  -6  -1    0.99    0.03
   0  -6   1    1.03    0.03
  -1  -6  -1    0.03    0.01
  -1  -6  -1    0.02    0.01
   1  -6   1    0.03    0.01
   1  -6   1    0.03    0.01
  -1  -6  -1    0.02    0.01
   1  -6   1    0.03    0.01
   2  -6   1    1.61    0.04
   2  -6   1    1.62    0.04
  -2  -6  -1    1.64    0.04
  -2  -6  -1    1.61    0.04
   2  -6   1    1.67    0.04
  -2  -6  -1    1.65    0.04
   2   6   1    1.66    0.05
   3  -6   1    0.30    0.02
  -3  -6  -1    0.34    0.02
   3  -6   1    0.30    0.01
   3  -6   1    0.30    0.01
   3  -6   1    0.28    0.02
  -3  -6  -1    0.32    0.01
   3   6   1    0.31    0.02
   4  -6   1    0.27    0.01
   4  -6   1    0.29    0.02
   4  -6   1    0.29    0.02
   4  -6   1    0.29    0.02
  -4  -6  -1    0.30    0.01
  -4  -6  -1    0.32    0.02
   4   6   1    0.28    0.01
   4   6   1    0.29    0.02
   5  -6   1    0.02    0.01
   5  -6   1    0.01    0.01
   5  -6   1    0.01    0.01
   5  -6   1    0.03    0.01
  -5   6  -1    0.02    0.01
   5   6   1    0.03    0.01
  -5   6  -1    0.02    0.01
  -5   6  -1    0.02    0.00
   5   6   1    0.02    0.01
  -5   6  -1    0.04    0.01
  -5   6  -1    0.01    0.01
   5   6   1    0.03    0.01
  -5   6  -1    0.01    0.01
  -5   6  -1    0.01    0.01
  -5   6  -1    0.02    0.01
   5   6   1    0.03    0.01
  -5   6  -1    0.02    0.01
  -6   6  -1    2.86    0.06
  -6   6  -1    2.91    0.07
  -6   6  -1    2.92    0.06
  -6   6  -1    2.85    0.06
  -6   6  -1    2.96    0.05
   6   6   1    2.74    0.07
   6   6   1    2.79    0.07
  -6   6  -1    2.91    0.06
  -6   6  -1    2.94    0.06
  -6   6  -1    2.91    0.05
  -6   6  -1    2.92    0.06
   6   6   1    2.86    0.06
  -7   6  -1    0.98    0.03
  -7   6  -1    0.96    0.03
  -7   6  -1    0.89    0.03
  -7   6  -1    0.99    0.03
  -7   6  -1    1.00    0.03
  -7   6  -1    0.95    0.03
  -7   6  -1    0.94    0.03
   7   6   1    0.95    0.03
   7   6   1    0.88    0.03
  -8  -6  -1    0.19    0.01
  -8   6  -1    0.19    0.01
   8   6   1    0.19    0.01
  -8   6  -1    0.16    0.02
  -8   6  -1    0.19    0.01
  -8   6  -1    0.20    0.01
  -9  -6  -1    0.04    0.01
  -9   6  -1    0.04    0.01
  -9   6  -1    0.05    0.01
  -9   6  -1    0.04    0.01
   9   6   1    0.05    0.01
  -9   6  -1    0.05    0.01
 -10   6  -1    0.16    0.01
  10   6   1    0.14    0.01
  10   6   1    0.16    0.01
 -10   6  -1    0.15    0.01
 -10   7   1    0.33    0.01
 -10   7   1    0.34    0.01
  10   7  -1    0.33    0.01
 -10   7   1    0.32    0.01
   9   7  -1    0.44    0.01
   9   7  -1    0.47    0.01
  -9   7   1    0.49    0.02
  -9   7   1    0.50    0.02
  -9   7   1    0.47    0.02
  -8  -7   1    0.04    0.01
  -8   7   1    0.05    0.01
   8   7  -1    0.04    0.01
  -8   7   1    0.03    0.01
  -8   7   1    0.03    0.01
  -8   7   1    0.04    0.01
  -8   7   1    0.03    0.01
   8   7  -1    0.05    0.01
  -7   7   1    0.03    0.01
   7   7  -1    0.04    0.01
  -7   7   1    0.04    0.01
  -7   7   1    0.05    0.01
  -7   7   1    0.05    0.01
  -7   7   1    0.05    0.01
  -7   7   1    0.05    0.01
  -7   7   1    0.04    0.01
  -7   7   1    0.04    0.01
  -6   7   1    0.79    0.03
  -6   7   1    0.80    0.02
  -6   7   1    0.86    0.03
   6   7  -1    0.82    0.03
  -6   7   1    0.83    0.03
  -6   7   1    0.83    0.03
  -6   7   1    0.82    0.03
  -6   7   1    0.80    0.02
   6   7  -1    0.85    0.02
  -6   7   1    0.80    0.02
   5   7  -1    0.86    0.03
  -5   7   1    0.86    0.03
   5   7  -1    0.87    0.02
  -5   7   1    0.84    0.03
   5   7  -1    0.81    0.02
   5   7  -1    0.84    0.03
  -5   7   1    0.87    0.03
  -5   7   1    0.84    0.03
  -5   7   1    0.84    0.03
  -5   7   1    0.85    0.03
  -5   7   1    0.87    0.03
  -5   7   1    0.89    0.03
   4  -7  -1    1.07    0.03
   4   7  -1    1.07    0.03
  -4   7   1    1.15    0.03
   4   7  -1    1.07    0.03
  -4   7   1    1.11    0.03
  -4   7   1    1.09    0.03
  -4   7   1    1.12    0.03
  -4   7   1    1.14    0.03
  -4   7   1    1.14    0.04
   4   7  -1    1.12    0.03
  -4   7   1    1.10    0.03
   4   7  -1    1.08    0.03
  -4   7   1    1.14    0.03
   4   7  -1    1.16    0.04
  -3  -7   1    0.76    0.03
   3  -7  -1    0.76    0.03
  -3  -7   1    0.77    0.03
   3  -7  -1    0.79    0.02
   3  -7  -1    0.78    0.02
  -3  -7   1    0.75    0.02
   3  -7  -1    0.79    0.03
  -3   7   1    0.77    0.02
  -3   7   1    0.75    0.02
   3   7  -1    0.75    0.02
  -3   7   1    0.74    0.03
   3   7  -1    0.74    0.03
  -3   7   1    0.77    0.03
  -3   7   1    0.76    0.02
   3   7  -1    0.74    0.02
  -3   7   1    0.78    0.02
  -3   7   1    0.75    0.02
   3   7  -1    0.78    0.03
  -3   7   1    0.73    0.02
   3   7  -1    0.74    0.03
   3   7  -1    0.76    0.02
  -2  -7   1    0.01    0.01
  -2  -7   1   -0.01    0.01
   2  -7  -1    0.00    0.01
   2  -7  -1    0.00    0.01
  -2  -7   1   -0.01    0.01
   2  -7  -1    0.01    0.01
   2   7  -1    0.01    0.01
  -2   7   1    0.00    0.01
   2   7  -1    0.01    0.01
   2   7  -1    0.00    0.00
  -1  -7   1    0.07    0.01
   1  -7  -1    0.09    0.01
   1  -7  -1    0.09    0.01
   1  -7  -1    0.10    0.01
  -1  -7   1    0.08    0.01
  -1  -7   1    0.09    0.01
   1   7  -1    0.08    0.00
   0  -7  -1    0.83    0.03
   0  -7   1    0.82    0.03
   0  -7   1    0.86    0.03
   0  -7  -1    0.80    0.02
   0  -7   1    0.79    0.02
   0  -7  -1    0.80    0.02
   1  -7   1    2.48    0.06
   1  -7   1    2.45    0.06
   1  -7   1    2.41    0.06
  -1  -7  -1    2.46    0.06
  -1  -7  -1    2.37    0.06
  -1  -7  -1    2.45    0.06
  -2  -7  -1    1.18    0.04
   2  -7   1    1.26    0.04
   2  -7   1    1.20    0.03
   2  -7   1    1.18    0.04
   2  -7   1    1.17    0.03
  -2  -7  -1    1.19    0.03
  -2  -7  -1    1.20    0.03
   2   7   1    1.17    0.03
  -2   7  -1    1.14    0.03
  -3  -7  -1    0.61    0.02
   3  -7   1    0.58    0.02
  -3  -7  -1    0.59    0.02
   3  -7   1    0.58    0.02
  -3  -7  -1    0.58    0.02
   3  -7   1    0.57    0.02
   3  -7   1    0.57    0.02
  -3   7  -1    0.57    0.02
  -3   7  -1    0.58    0.02
   3   7   1    0.62    0.02
   3   7   1    0.58    0.02
  -3   7  -1    0.57    0.01
  -3   7  -1    0.56    0.02
  -3   7  -1    0.57    0.02
  -3   7  -1    0.58    0.02
  -3   7  -1    0.55    0.02
   3   7   1    0.62    0.03
   3   7   1    0.59    0.02
  -3   7  -1    0.57    0.01
   3   7   1    0.60    0.02
  -3   7  -1    0.63    0.02
  -3   7  -1    0.63    0.03
   3   7   1    0.57    0.02
  -4  -7  -1    0.27    0.02
  -4  -7  -1    0.28    0.01
  -4  -7  -1    0.27    0.02
   4   7   1    0.24    0.02
  -4   7  -1    0.28    0.01
  -4   7  -1    0.24    0.02
  -4   7  -1    0.25    0.02
   4   7   1    0.27    0.01
  -4   7  -1    0.26    0.01
  -4   7  -1    0.27    0.02
   4   7   1    0.26    0.02
  -4   7  -1    0.30    0.02
   4   7   1    0.26    0.01
   4   7   1    0.23    0.02
  -4   7  -1    0.23    0.01
  -4   7  -1    0.27    0.02
   5   7   1    0.31    0.01
  -5   7  -1    0.31    0.01
   5   7   1    0.31    0.02
   5   7   1    0.31    0.02
  -5   7  -1    0.33    0.02
  -5   7  -1    0.32    0.02
  -5   7  -1    0.32    0.02
  -5   7  -1    0.30    0.02
   5   7   1    0.31    0.01
  -5   7  -1    0.33    0.02
  -5   7  -1    0.32    0.01
  -5   7  -1    0.33    0.02
   5   7   1    0.31    0.02
  -6   7  -1    1.65    0.04
  -6   7  -1    1.66    0.04
  -6   7  -1    1.64    0.04
   6   7   1    1.68    0.04
  -6   7  -1    1.65    0.04
  -6   7  -1    1.63    0.04
  -6   7  -1    1.59    0.04
   6   7   1    1.45    0.04
  -6   7  -1    1.58    0.04
   6   7   1    1.64    0.03
   6   7   1    1.56    0.04
   7   7   1    1.45    0.03
   7   7   1    1.39    0.03
  -7   7  -1    1.37    0.03
  -7   7  -1    1.38    0.03
  -7   7  -1    1.39    0.03
  -7   7  -1    1.34    0.04
  -7   7  -1    1.41    0.04
  -7   7  -1    1.39    0.03
  -7   7  -1    1.36    0.03
  -8  -7  -1    0.83    0.02
   8   7   1    0.82    0.02
  -8   7  -1    0.82    0.02
  -8   7  -1    0.79    0.02
  -8   7  -1    0.81    0.02
  -8   7  -1    0.79    0.02
  -8   7  -1    0.81    0.03
  -9  -7  -1    0.24    0.01
  -9   7  -1    0.25    0.01
  -9   7  -1    0.24    0.01
  -9   7  -1    0.25    0.01
  -9   7  -1    0.25    0.01
   9   7   1    0.24    0.01
 -10   7  -1    0.32    0.01
  10   7   1    0.33    0.01
  -9   8   1    0.03    0.01
   9   8  -1    0.04    0.00
  -9   8   1    0.04    0.00
  -9   8   1    0.05    0.00
   9   8  -1    0.03    0.00
  -8  -8   1    0.20    0.01
  -8   8   1    0.22    0.02
  -8   8   1    0.21    0.01
   8   8  -1    0.21    0.01
  -8   8   1    0.23    0.01
  -8   8   1    0.20    0.01
  -8   8   1    0.22    0.01
  -7   8   1    0.93    0.03
  -7   8   1    0.95    0.03
   7   8  -1    0.91    0.02
  -7   8   1    0.91    0.03
  -7   8   1    0.95    0.03
  -7   8   1    0.92    0.03
  -7   8   1    0.90    0.02
  -7   8   1    0.94    0.02
  -6   8   1    0.28    0.01
  -6   8   1    0.27    0.02
  -6   8   1    0.30    0.02
  -6   8   1    0.27    0.02
  -6   8   1    0.31    0.02
  -6   8   1    0.34    0.02
  -6   8   1    0.29    0.01
   6   8  -1    0.31    0.02
   6   8  -1    0.32    0.01
  -6   8   1    0.33    0.02
   5   8  -1    0.05    0.01
  -5   8   1    0.05    0.01
  -5   8   1    0.05    0.01
  -5   8   1    0.06    0.01
   5   8  -1    0.04    0.01
  -5   8   1    0.07    0.02
  -5   8   1    0.06    0.01
  -5   8   1    0.05    0.01
  -5   8   1    0.04    0.01
  -5   8   1    0.05    0.01
   4   8  -1    1.51    0.04
  -4   8   1    1.44    0.04
  -4   8   1    1.44    0.04
  -4   8   1    1.43    0.04
   4   8  -1    1.45    0.03
  -4   8   1    1.47    0.04
  -4   8   1    1.41    0.04
  -4   8   1    1.42    0.04
  -4   8   1    1.43    0.04
  -4   8   1    1.46    0.04
   4   8  -1    1.46    0.04
  -3   8   1    0.42    0.02
  -3   8   1    0.41    0.02
   3   8  -1    0.42    0.01
  -3   8   1    0.39    0.02
  -3   8   1    0.44    0.02
   3   8  -1    0.42    0.02
   3   8  -1    0.43    0.02
  -3   8   1    0.43    0.02
  -3   8   1    0.42    0.02
  -3   8   1    0.42    0.02
  -3   8   1    0.43    0.02
   2   8  -1    0.55    0.02
  -2   8   1    0.61    0.02
  -2   8   1    0.56    0.02
   2   8  -1    0.58    0.02
  -2   8   1    0.59    0.03
  -2   8   1    0.61    0.02
   2   8  -1    0.58    0.02
   2   8  -1    0.59    0.02
   2   8  -1    0.59    0.02
  -2   8   1    0.55    0.02
  -2   8   1    0.57    0.02
   2   8  -1    0.55    0.02
  -2   8   1    0.58    0.02
  -1  -8   1    0.50    0.02
  -1   8   1    0.54    0.02
  -1   8   1    0.53    0.02
   1   8  -1    0.55    0.02
  -1   8   1    0.53    0.02
   1   8  -1    0.55    0.01
  -1   8   1    0.54    0.02
  -1   8   1    0.54    0.02
   1   8  -1    0.49    0.02
  -1   8   1    0.52    0.02
  -1   8   1    0.56    0.02
   1   8  -1    0.56    0.02
   1   8  -1    0.55    0.02
   1   8  -1    0.52    0.02
   0  -8   1    0.01    0.01
   0   8  -1    0.00    0.00
   0   8  -1    0.01    0.01
   0   8   1    0.00    0.01
   0   8  -1   -0.01    0.01
   0   8   1   -0.01    0.01
   0   8  -1   -0.01    0.01
   0   8   1    0.00    0.01
   0   8  -1    0.01    0.01
   0   8   1    0.01    0.01
   0   8   1    0.00    0.01
   0   8  -1    0.00    0.01
   0   8   1    0.01    0.01
  -1   8  -1    1.09    0.03
   1   8   1    1.10    0.03
   1   8   1    1.05    0.03
  -1   8  -1    1.05    0.03
  -1   8  -1    1.06    0.03
  -1   8  -1    1.08    0.03
   1   8   1    1.06    0.03
   1   8   1    1.04    0.03
  -1   8  -1    0.99    0.03
  -1   8  -1    1.03    0.03
  -1   8  -1    1.07    0.03
   1   8   1    1.09    0.03
   1   8   1    1.05    0.03
   2   8   1    0.57    0.02
  -2   8  -1    0.57    0.02
  -2   8  -1    0.54    0.02
   2   8   1    0.53    0.02
  -2   8  -1    0.57    0.02
  -2   8  -1    0.51    0.02
  -2   8  -1    0.61    0.02
  -2   8  -1    0.57    0.02
   2   8   1    0.55    0.02
   2   8   1    0.55    0.02
   2   8   1    0.60    0.02
  -2   8  -1    0.57    0.02
  -3   8  -1    0.55    0.02
   3   8   1    0.55    0.02
   3   8   1    0.58    0.01
  -3   8  -1    0.57    0.02
   3   8   1    0.57    0.02
  -3   8  -1    0.54    0.02
  -3   8  -1    0.56    0.02
   3   8   1    0.55    0.02
  -3   8  -1    0.58    0.02
  -3   8  -1    0.54    0.02
  -3   8  -1    0.54    0.02
   3   8   1    0.55    0.02
  -3   8  -1    0.56    0.02
   4   8   1    1.16    0.03
  -4   8  -1    1.24    0.03
  -4   8  -1    1.20    0.03
  -4   8  -1    1.14    0.03
  -4   8  -1    1.16    0.03
  -4   8  -1    1.16    0.04
  -4   8  -1    1.17    0.03
   4   8   1    1.10    0.03
   4   8   1    1.13    0.03
  -4   8  -1    1.20    0.03
  -4   8  -1    1.17    0.03
   4   8   1    1.18    0.03
  -5   8  -1    0.56    0.02
  -5   8  -1    0.53    0.02
  -5   8  -1    0.52    0.02
  -5   8  -1    0.52    0.02
  -5   8  -1    0.54    0.02
   5   8   1    0.53    0.01
   5   8   1    0.54    0.02
  -5   8  -1    0.53    0.02
  -5   8  -1    0.53    0.02
  -5   8  -1    0.55    0.02
  -6   8  -1    0.02    0.01
  -6   8  -1    0.01    0.01
  -6   8  -1    0.00    0.01
  -6   8  -1    0.01    0.01
  -6   8  -1    0.00    0.01
  -6   8  -1    0.00    0.01
  -6   8  -1    0.00    0.01
   6   8   1    0.00    0.00
   6   8   1    0.00    0.01
  -7   8  -1    1.08    0.03
  -7   8  -1    1.06    0.03
   7   8   1    1.11    0.02
  -7   8  -1    1.12    0.03
  -7   8  -1    1.11    0.03
  -7   8  -1    1.11    0.03
  -7   8  -1    1.05    0.03
  -7   8  -1    1.09    0.03
  -8  -8  -1    0.01    0.01
  -8   8  -1    0.02    0.01
   8   8   1    0.02    0.00
  -8   8  -1    0.00    0.01
  -8   8  -1    0.01    0.01
  -8   8  -1    0.01    0.01
   8   8   1    0.01    0.00
  -8   8  -1    0.01    0.00
  -9   8  -1    0.10    0.01
  -9   8  -1    0.11    0.01
  -8   9   1    0.05    0.01
  -8   9   1    0.06    0.01
  -7   9   1    0.11    0.01
  -7   9   1    0.11    0.01
  -7   9   1    0.11    0.01
  -7   9   1    0.09    0.01
  -7   9   1    0.12    0.01
  -7   9   1    0.13    0.01
  -7   9   1    0.11    0.01
  -6   9   1    0.24    0.01
  -6   9   1    0.22    0.01
  -6   9   1    0.22    0.02
  -6   9   1    0.21    0.01
  -6   9   1    0.22    0.01
  -6   9   1    0.23    0.01
  -6   9   1    0.21    0.01
  -6   9   1    0.22    0.01
  -5   9   1    0.28    0.01
  -5   9   1    0.31    0.02
  -5   9   1    0.28    0.01
  -5   9   1    0.27    0.02
  -5   9   1    0.29    0.02
   5   9  -1    0.29    0.01
   5   9  -1    0.28    0.01
  -5   9   1    0.31    0.02
  -5   9   1    0.31    0.02
   5   9  -1    0.29    0.02
  -5   9   1    0.28    0.01
  -4   9   1    0.70    0.02
   4   9  -1    0.74    0.02
  -4   9   1    0.76    0.03
  -4   9   1    0.70    0.03
   4   9  -1    0.72    0.02
  -4   9   1    0.73    0.02
  -4   9   1    0.68    0.02
  -4   9   1    0.78    0.02
  -4   9   1    0.71    0.02
   4   9  -1    0.70    0.02
  -4   9   1    0.74    0.02
   4   9  -1    0.71    0.02
  -3   9   1    0.01    0.01
  -3   9   1    0.03    0.01
  -3   9   1    0.02    0.01
   3   9  -1    0.01    0.01
   3   9  -1   -0.01    0.01
  -3   9   1    0.02    0.01
  -3   9   1    0.03    0.01
  -3   9   1    0.01    0.01
  -3   9   1    0.01    0.01
  -2   9   1   -0.01    0.01
   2   9  -1   -0.01    0.01
  -2   9   1   -0.01    0.01
   2   9  -1    0.00    0.01
  -2   9   1    0.00    0.01
   2   9  -1    0.00    0.01
  -2   9   1    0.00    0.01
  -2   9   1   -0.01    0.01
  -2   9   1    0.00    0.01
  -2   9   1    0.01    0.01
   1   9  -1    0.37    0.02
   1   9  -1    0.36    0.02
   1   9  -1    0.39    0.02
  -1   9   1    0.38    0.02
  -1   9   1    0.36    0.02
  -1   9   1    0.35    0.02
   1   9  -1    0.38    0.02
  -1   9   1    0.39    0.02
  -1   9   1    0.39    0.02
   1   9  -1    0.40    0.02
   1   9  -1    0.41    0.02
  -1   9   1    0.39    0.02
  -1   9   1    0.40    0.02
   0  -9   1    0.87    0.03
   0   9  -1    0.98    0.03
   0   9  -1    0.93    0.03
   0   9  -1    1.01    0.03
   0   9   1    0.93    0.03
   0   9  -1    0.94    0.03
   0   9  -1    0.93    0.03
   0   9   1    0.91    0.03
   0   9   1    0.93    0.03
   0   9   1    0.90    0.03
   0   9   1    0.92    0.03
   0   9   1    1.00    0.03
   1  -9   1    1.17    0.03
  -1   9  -1    1.13    0.03
   1   9   1    1.22    0.03
  -1   9  -1    1.15    0.03
  -1   9  -1    1.14    0.03
  -1   9  -1    1.14    0.03
   1   9   1    1.19    0.03
   1   9   1    1.19    0.03
   1   9   1    1.20    0.03
   1   9   1    1.12    0.03
   1   9   1    1.13    0.03
  -1   9  -1    1.15    0.03
  -1   9  -1    1.19    0.03
   2  -9   1    0.11    0.01
  -2   9  -1    0.09    0.01
   2   9   1    0.08    0.01
  -2   9  -1    0.10    0.01
  -2   9  -1    0.09    0.01
  -2   9  -1    0.07    0.01
   2   9   1    0.08    0.01
  -2   9  -1    0.09    0.01
   2   9   1    0.10    0.01
   2   9   1    0.08    0.01
  -2   9  -1    0.11    0.01
  -2   9  -1    0.10    0.01
  -3   9  -1    0.24    0.02
   3   9   1    0.26    0.01
  -3   9  -1    0.28    0.02
  -3   9  -1    0.24    0.01
   3   9   1    0.25    0.01
  -3   9  -1    0.26    0.01
  -3   9  -1    0.29    0.02
  -3   9  -1    0.25    0.02
   3   9   1    0.25    0.02
  -3   9  -1    0.25    0.01
  -3   9  -1    0.26    0.01
   4   9   1    0.15    0.01
  -4   9  -1    0.11    0.01
  -4   9  -1    0.12    0.01
  -4   9  -1    0.12    0.01
  -4   9  -1    0.14    0.01
  -4   9  -1    0.12    0.01
  -4   9  -1    0.12    0.01
  -4   9  -1    0.14    0.01
   4   9   1    0.13    0.01
  -4   9  -1    0.13    0.01
  -5   9  -1    0.27    0.02
  -5   9  -1    0.23    0.01
  -5   9  -1    0.27    0.01
  -5   9  -1    0.26    0.02
  -5   9  -1    0.28    0.01
  -5   9  -1    0.30    0.02
   5   9   1    0.23    0.01
  -5   9  -1    0.27    0.01
  -5   9  -1    0.25    0.01
   6   9   1    0.03    0.01
  -6   9  -1    0.03    0.01
  -6   9  -1    0.04    0.01
  -6   9  -1    0.03    0.01
  -6   9  -1    0.02    0.01
  -6   9  -1    0.03    0.01
  -6   9  -1    0.02    0.01
  -7   9  -1    0.03    0.01
  -7   9  -1    0.03    0.01
  -7   9  -1    0.03    0.01
  -7   9  -1    0.03    0.01
  -7   9  -1    0.04    0.01
  -7   9  -1    0.03    0.01
  -8   9  -1    0.02    0.01
  -6  10   1    0.06    0.01
  -6  10   1    0.06    0.01
  -6  10   1    0.07    0.01
  -6  10   1    0.06    0.01
  -6  10   1    0.06    0.01
  -6  10   1    0.06    0.01
  -6  10   1    0.07    0.01
  -5  10   1    0.09    0.01
  -5  10   1    0.10    0.01
  -5  10   1    0.10    0.01
  -5  10   1    0.10    0.01
  -5  10   1    0.09    0.01
  -5  10   1    0.11    0.01
  -5  10   1    0.10    0.01
  -5  10   1    0.10    0.01
  -4  10   1    0.47    0.02
  -4  10   1    0.46    0.02
  -4  10   1    0.50    0.02
  -4  10   1    0.46    0.02
  -4  10   1    0.49    0.02
   4  10  -1    0.46    0.02
  -4  10   1    0.49    0.02
  -4  10   1    0.47    0.02
  -3  10   1    0.19    0.01
  -3  10   1    0.20    0.01
  -3  10   1    0.21    0.01
  -3  10   1    0.21    0.01
   3  10  -1    0.21    0.01
  -3  10   1    0.19    0.01
  -3  10   1    0.20    0.01
   3  10  -1    0.22    0.01
  -3  10   1    0.18    0.01
   2  10  -1    0.38    0.02
  -2  10   1    0.39    0.02
  -2  10   1    0.41    0.02
  -2  10   1    0.45    0.02
  -2  10   1    0.44    0.02
  -2  10   1    0.39    0.02
  -2  10   1    0.45    0.02
   2  10  -1    0.43    0.02
  -2  10   1    0.39    0.02
   1  10  -1    0.72    0.02
   1  10  -1    0.73    0.02
  -1  10   1    0.73    0.02
  -1  10   1    0.68    0.02
   1  10  -1    0.68    0.02
   1  10  -1    0.72    0.02
   1  10  -1    0.69    0.02
  -1  10   1    0.75    0.02
  -1  10   1    0.70    0.02
  -1  10   1    0.73    0.02
  -1  10   1    0.71    0.02
   0  10   1    0.02    0.01
   0  10  -1    0.03    0.01
   0  10   1    0.03    0.01
   0  10   1    0.03    0.01
   0  10  -1    0.03    0.01
   0  10   1    0.03    0.01
   0  10   1    0.02    0.01
   0  10  -1    0.03    0.01
   0  10   1    0.02    0.01
   0  10  -1    0.02    0.01
   0  10   1    0.03    0.01
   0  10  -1    0.03    0.01
   0  10  -1    0.03    0.01
   1  10   1    0.32    0.01
   1  10   1    0.34    0.01
  -1  10  -1    0.35    0.02
   1  10   1    0.34    0.02
   1  10   1    0.34    0.02
   1  10   1    0.34    0.02
  -1  10  -1    0.36    0.02
  -1  10  -1    0.31    0.01
  -1  10  -1    0.34    0.01
  -1  10  -1    0.33    0.02
   2 -10   1    0.54    0.02
   2  10   1    0.63    0.02
  -2  10  -1    0.62    0.02
  -2  10  -1    0.65    0.02
  -2  10  -1    0.63    0.02
  -2  10  -1    0.65    0.02
   2  10   1    0.67    0.02
   2  10   1    0.62    0.02
  -2  10  -1    0.64    0.02
   3 -10   1    0.07    0.01
   3  10   1    0.05    0.01
  -3  10  -1    0.06    0.01
  -3  10  -1    0.07    0.01
  -3  10  -1    0.07    0.01
   3  10   1    0.06    0.01
  -3  10  -1    0.06    0.01
  -3  10  -1    0.06    0.01
   3  10   1    0.07    0.01
   4 -10   1    0.05    0.01
  -4  10  -1    0.05    0.01
  -4  10  -1    0.04    0.01
  -4  10  -1    0.04    0.01
  -4  10  -1    0.03    0.01
  -4  10  -1    0.06    0.01
  -4  10  -1    0.05    0.01
  -4  10  -1    0.05    0.01
   4  10   1    0.04    0.01
   5 -10   1    0.07    0.01
  -5  10  -1    0.07    0.01
  -5  10  -1    0.07    0.01
  -5  10  -1    0.08    0.01
  -5  10  -1    0.06    0.01
  -5  10  -1    0.06    0.01
  -5  10  -1    0.06    0.01
   5  10   1    0.06    0.01
  -5  10  -1    0.07    0.01
   6 -10   1    0.00    0.00
  -6  10  -1    0.00    0.00
  -6  10  -1    0.00    0.00
  -6  10  -1    0.01    0.01
  -6  10  -1   -0.01    0.00
  -4  11   1    0.01    0.00
  -4  11   1    0.01    0.00
  -3  11   1    0.11    0.01
  -3  11   1    0.11    0.01
  -3  11   1    0.10    0.01
  -3  11   1    0.11    0.01
  -3  11   1    0.11    0.01
  -3  11   1    0.11    0.01
  -3  11   1    0.10    0.01
  -2  11   1    0.01    0.00
   2  11  -1    0.01    0.00
  -2  11   1    0.01    0.00
  -2  11   1   -0.01    0.01
  -2  11   1    0.01    0.00
  -2  11   1    0.00    0.00
  -2  11   1    0.00    0.01
  -2  11   1    0.01    0.01
  -1  11   1    0.21    0.01
   1  11  -1    0.20    0.01
  -1  11   1    0.20    0.01
  -1  11   1    0.18    0.01
  -1  11   1    0.20    0.01
  -1  11   1    0.20    0.01
   0  11   1    0.01    0.01
   0  11  -1    0.01    0.00
   0  11   1    0.00    0.00
   0  11   1    0.01    0.00
   0  11   1    0.00    0.01
   0  11  -1   -0.01    0.00
  -1  11  -1    0.01    0.01
  -1  11  -1    0.03    0.00
  -1  11  -1    0.02    0.01
   1  11   1    0.02    0.01
  -1  11  -1    0.02    0.00
   1  11   1    0.01    0.00
   1  11   1    0.02    0.01
  -1  11  -1    0.03    0.01
   2  11   1    0.07    0.01
  -2  11  -1    0.07    0.01
  -2  11  -1    0.07    0.01
   2  11   1    0.07    0.01
  -2  11  -1    0.07    0.01
   2  11   1    0.07    0.01
  -2  11  -1    0.08    0.01
  -2  11  -1    0.09    0.01
  -2  11  -1    0.06    0.01
  -3  11  -1    0.02    0.00
  -3  11  -1    0.02    0.00
  -3  11  -1    0.01    0.01
  -3  11  -1    0.02    0.00
  -3  11  -1    0.02    0.01
  -3  11  -1    0.03    0.01
   3  11   1    0.02    0.00
  -4  11  -1    0.06    0.00
  -4  11  -1    0.06    0.01
  12   0  -2    0.12    0.01
 -12   0   2    0.12    0.01
 -12   0   2    0.12    0.01
  11   0  -2    0.00    0.01
 -11   0   2    0.01    0.01
 -11   0   2    0.00    0.00
  10   0  -2    0.01    0.01
 -10   0   2    0.01    0.01
 -10   0   2    0.00    0.01
 -10   0   2    0.02    0.01
  -9   0   2   -0.01    0.01
  -9   0   2   -0.01    0.01
   9   0  -2    0.01    0.01
  -9   0   2    0.00    0.01
   8   0  -2    1.78    0.05
  -8   0   2    1.76    0.04
  -8   0   2    1.72    0.05
   8   0  -2    1.69    0.04
   8   0  -2    1.84    0.05
   7   0  -2    0.01    0.01
   7   0  -2    0.01    0.01
   7   0  -2    0.00    0.01
   6   0  -2   12.60    0.28
   6   0  -2   12.09    0.27
   6   0  -2   12.57    0.29
   6   0  -2   12.36    0.26
   5   0  -2    0.00    0.00
   5   0  -2    0.00    0.01
   5   0  -2    0.00    0.01
   5   0  -2   -0.01    0.01
   4   0  -2    2.61    0.06
   4   0  -2    2.75    0.06
   4   0  -2    2.62    0.06
   4   0  -2    2.68    0.07
   3   0  -2    0.00    0.00
   3   0  -2   -0.01    0.01
   3   0  -2   -0.01    0.01
   3   0  -2   -0.01    0.00
   2   0  -2    5.26    0.11
   2   0  -2    5.33    0.12
   2   0  -2    5.24    0.12
   2   0  -2    5.25    0.11
   1   0  -2    0.00    0.00
   1   0  -2    0.00    0.00
   1   0   2   -0.09    0.00
  -1   0  -2   -0.10    0.00
  -2   0  -2  107.33    2.46
  -2   0  -2  108.27    2.25
   2   0   2  106.77    2.17
  -2   0  -2  107.42    2.17
   2   0   2  105.72    2.34
   2   0   2  108.89    2.22
  -3   0  -2    0.00    0.01
  -3   0  -2    0.01    0.01
   3   0   2    0.00    0.01
   3   0   2    0.01    0.01
   3   0   2    0.00    0.01
   3   0   2    0.00    0.01
  -3   0  -2    0.01    0.01
   4   0   2    1.40    0.04
  -4   0  -2    1.42    0.04
   4   0   2    1.37    0.04
   4   0   2    1.37    0.03
   4   0   2    1.41    0.03
   4   0   2    1.38    0.04
   5   0   2    0.00    0.01
  -5   0  -2    0.01    0.01
   5   0   2    0.00    0.01
   5   0   2    0.00    0.00
   5   0   2   -0.01    0.01
   6   0   2   12.10    0.25
   6   0   2   12.06    0.27
   7   0   2   -0.01    0.01
   8   0   2    0.01    0.01
   8   0   2    0.02    0.01
   9   0   2    0.00    0.01
  10   0   2    0.01    0.01
 -10   0  -2    0.02    0.01
  11   0   2    0.00    0.01
 -11   0  -2    0.00    0.01
 -11   0  -2   -0.01    0.01
 -12   0  -2    0.28    0.01
 -12   0  -2    0.26    0.01
 -12  -1   2    0.00    0.00
  12  -1  -2    0.01    0.01
 -12  -1   2    0.00    0.00
 -12   1   2    0.00    0.00
 -12   1   2    0.00    0.00
 -11  -1   2    0.03    0.01
  11  -1  -2    0.03    0.01
 -11  -1   2    0.04    0.01
 -11  -1   2    0.03    0.01
 -11   1   2    0.03    0.01
 -11   1   2    0.05    0.01
 -11   1   2    0.02    0.00
  11   1  -2    0.02    0.01
  10  -1  -2    0.05    0.01
 -10  -1   2    0.05    0.01
 -10  -1   2    0.06    0.01
 -10   1   2    0.05    0.00
  10   1  -2    0.06    0.01
 -10   1   2    0.05    0.01
 -10   1   2    0.05    0.01
 -10   1   2    0.06    0.01
   9  -1  -2    0.01    0.01
  -9  -1   2    0.01    0.01
  -9  -1   2    0.00    0.01
  -9  -1   2    0.01    0.01
  -9   1   2    0.02    0.01
   9   1  -2   -0.01    0.01
  -9   1   2    0.00    0.01
  -9   1   2   -0.01    0.00
  -9   1   2    0.01    0.01
   8  -1  -2    0.00    0.01
  -8  -1   2   -0.01    0.01
   8  -1  -2    0.00    0.01
   8  -1  -2    0.01    0.01
   8   1  -2    0.00    0.01
  -8   1   2    0.01    0.01
   8   1  -2   -0.01    0.01
   8   1  -2    0.01    0.01
  -8   1   2    0.00    0.01
   7  -1  -2    0.01    0.01
   7  -1  -2    0.01    0.01
   7  -1  -2    0.01    0.01
   7  -1  -2    0.02    0.01
   7   1  -2    0.00    0.01
   7   1  -2    0.01    0.01
   6  -1  -2    0.68    0.02
   6  -1  -2    0.71    0.02
   6  -1  -2    0.73    0.03
   6  -1  -2    0.73    0.03
   6   1  -2    0.74    0.02
   6   1  -2    0.79    0.03
   6   1  -2    0.72    0.03
   5  -1  -2    6.15    0.13
   5  -1  -2    6.11    0.15
   5  -1  -2    6.02    0.13
   5  -1  -2    6.29    0.14
   5   1  -2    6.09    0.13
   5   1  -2    6.08    0.14
   5   1  -2    6.00    0.14
   5   1  -2    5.89    0.13
   4  -1  -2    7.91    0.17
   4  -1  -2    7.77    0.17
   4  -1  -2    7.78    0.16
   4  -1  -2    7.83    0.18
   4   1  -2    7.54    0.17
   4   1  -2    7.70    0.18
   4   1  -2    7.86    0.16
   4   1  -2    7.62    0.17
   3  -1  -2   33.89    0.73
   3  -1  -2   33.11    0.69
   3  -1  -2   32.86    0.75
   3  -1  -2   33.58    0.73
   3  -1  -2   32.33    0.68
   3   1  -2   32.72    0.69
   3   1  -2   32.75    0.74
   3   1  -2   32.60    0.75
   3   1  -2   32.08    0.67
   2  -1  -2   10.51    0.22
   2  -1  -2   10.31    0.21
   2  -1  -2   10.69    0.23
   2   1  -2   10.03    0.24
   2   1  -2   10.44    0.22
   2   1  -2   10.45    0.23
   2   1  -2   10.12    0.21
   1   1  -2    1.06    0.03
   1   1  -2    1.09    0.02
   1   1  -2    1.06    0.03
   0   1  -2   18.04    0.41
   0   1  -2   17.76    0.41
   1  -1   2    0.36    0.01
  -1  -1  -2    0.34    0.01
  -1  -1  -2    0.36    0.01
   1  -1   2    0.38    0.01
   1  -1   2    0.36    0.01
   1  -1   2    0.36    0.01
  -1   1  -2    0.35    0.01
   1   1   2    0.36    0.01
   1   1   2    0.37    0.01
   2  -1   2   11.66    0.24
  -2  -1  -2   11.78    0.25
  -2  -1  -2   11.17    0.24
   2  -1   2   12.04    0.24
   2  -1   2   11.83    0.25
   2  -1   2   11.15    0.26
  -2  -1  -2   11.98    0.27
   2   1   2   11.67    0.27
   2   1   2   12.35    0.24
   2   1   2   11.46    0.26
  -2   1  -2   11.74    0.27
  -3  -1  -2  133.33    2.74
  -3  -1  -2  136.80    3.18
   3  -1   2  138.04    2.80
   3  -1   2  134.18    2.74
   3  -1   2  132.67    2.95
   3  -1   2  134.55    2.92
  -3  -1  -2  137.62    2.85
   3   1   2  132.69    2.86
   3   1   2  134.03    2.95
   3   1   2  134.93    2.80
   3   1   2  135.69    3.07
  -3   1  -2  140.22    3.11
   4  -1   2    2.85    0.07
   4  -1   2    2.89    0.07
   4  -1   2    2.85    0.06
   4  -1   2    2.93    0.06
  -4  -1  -2    2.78    0.07
  -4  -1  -2    2.82    0.06
   4  -1   2    2.80    0.07
  -4  -1  -2    2.91    0.07
   4   1   2    2.91    0.07
   4   1   2    2.83    0.06
  -4   1  -2    2.87    0.07
   4   1   2    2.84    0.07
   5  -1   2   32.30    0.71
   5  -1   2   33.06    0.67
   5  -1   2   32.54    0.74
   5  -1   2   32.43    0.66
   5  -1   2   32.68    0.69
  -5   1  -2   32.56    0.75
   5   1   2   32.52    0.74
   5   1   2   32.56    0.71
   5   1   2   32.73    0.67
   6  -1   2   47.13    1.06
   6  -1   2   47.06    0.94
   6  -1   2   46.26    1.01
   6  -1   2   45.89    0.96
   6   1   2   46.37    1.01
  -6   1  -2   46.32    1.07
   7  -1   2    0.22    0.02
   7   1   2    0.20    0.01
  -8  -1  -2    0.14    0.01
   8  -1   2    0.18    0.01
   8  -1   2    0.16    0.01
   8   1   2    0.16    0.01
  -8   1  -2    0.16    0.01
   8   1   2    0.16    0.01
  -8   1  -2    0.15    0.01
   9  -1   2    0.50    0.02
   9   1   2    0.42    0.02
  -9   1  -2    0.52    0.02
  10  -1   2    0.01    0.01
 -10   1  -2    0.00    0.01
  10   1   2    0.01    0.01
 -10   1  -2    0.01    0.01
 -11  -1  -2    0.17    0.01
  11  -1   2    0.12    0.01
 -11   1  -2    0.14    0.01
 -11   1  -2    0.14    0.01
 -11   1  -2    0.16    0.01
 -12  -1  -2    0.12    0.01
 -12  -1  -2    0.13    0.01
 -12   1  -2    0.12    0.01
 -12   1  -2    0.12    0.01
 -12   1  -2    0.11    0.01
 -12  -2   2    0.02    0.01
  12  -2  -2    0.01    0.01
 -12  -2   2    0.03    0.00
 -12   2   2    0.03    0.01
 -12   2   2    0.02    0.01
 -11  -2   2    0.03    0.01
 -11  -2   2    0.02    0.01
  11  -2  -2    0.01    0.01
 -11   2   2    0.03    0.01
 -11   2   2    0.02    0.01
  11   2  -2    0.03    0.01
 -10  -2   2    0.20    0.02
  10  -2  -2    0.21    0.02
 -10  -2   2    0.19    0.01
 -10  -2   2    0.18    0.01
 -10   2   2    0.17    0.01
 -10   2   2    0.17    0.01
  10   2  -2    0.19    0.01
 -10   2   2    0.19    0.01
  -9  -2   2    0.81    0.03
  -9   2   2    0.78    0.02
   9   2  -2    0.79    0.02
  -9   2   2    0.85    0.03
  -9   2   2    0.77    0.02
   8  -2  -2    1.00    0.03
   8  -2  -2    1.01    0.03
   8  -2  -2    1.06    0.04
   8  -2  -2    1.03    0.04
  -8  -2   2    1.01    0.03
  -8   2   2    1.01    0.03
   8   2  -2    1.05    0.03
   8   2  -2    1.04    0.03
  -8   2   2    1.05    0.03
  -8   2   2    1.00    0.02
   8   2  -2    1.02    0.03
  -8   2   2    1.04    0.03
  -8   2   2    1.02    0.02
   7  -2  -2    0.00    0.01
   7  -2  -2    0.00    0.01
   7  -2  -2    0.00    0.01
   7  -2  -2    0.00    0.01
   7   2  -2    0.00    0.01
   7   2  -2    0.00    0.01
   6  -2  -2    1.45    0.04
   6  -2  -2    1.38    0.04
   6  -2  -2    1.37    0.04
   6  -2  -2    1.35    0.03
   6   2  -2    1.40    0.04
   6   2  -2    1.35    0.04
   5  -2  -2    1.88    0.05
   5  -2  -2    1.91    0.05
   5  -2  -2    1.93    0.04
   5  -2  -2    2.00    0.05
   5   2  -2    1.93    0.05
   5   2  -2    1.92    0.05
   4  -2  -2    0.69    0.02
   4  -2  -2    0.69    0.02
   4  -2  -2    0.69    0.02
   4  -2  -2    0.64    0.02
   4   2  -2    0.65    0.02
   4   2  -2    0.67    0.02
   4   2  -2    0.65    0.02
  -3  -2   2    4.88    0.11
  -3  -2   2    4.92    0.10
   3  -2  -2    4.96    0.10
   3  -2  -2    5.15    0.11
   3  -2  -2    4.81    0.10
   3  -2  -2    5.17    0.11
   3   2  -2    4.88    0.11
   3   2  -2    4.90    0.11
   3   2  -2    4.91    0.10
   3   2  -2    4.91    0.12
   2  -2  -2   31.07    0.64
   2  -2  -2   29.67    0.64
  -2  -2   2   31.50    0.65
   2  -2  -2   32.03    0.68
   2  -2  -2   31.90    0.65
  -2  -2   2   31.29    0.62
   2   2  -2   29.85    0.71
   2   2  -2   30.00    0.67
   2   2  -2   30.01    0.70
   2   2  -2   29.94    0.65
   2   2  -2   30.93    0.63
  -1  -2   2   36.30    0.75
  -1  -2   2   36.45    0.76
  -1  -2   2   35.53    0.73
   1   2  -2   35.69    0.82
   1   2  -2   35.80    0.83
   1   2  -2   36.17    0.79
   0  -2  -2   78.95    1.68
   0  -2   2   77.63    1.63
   0  -2   2   77.60    1.59
   0  -2   2   79.71    1.65
   0  -2  -2   76.90    1.68
   0   2  -2   79.71    1.79
   0   2  -2   80.20    1.81
   1  -2   2    4.01    0.08
   1  -2   2    3.89    0.08
   1  -2   2    3.98    0.08
  -1  -2  -2    4.10    0.08
  -1  -2  -2    3.98    0.08
  -1   2  -2    3.81    0.09
   1   2   2    3.92    0.09
  -1   2  -2    4.05    0.09
   1   2   2    3.84    0.09
   2  -2   2    1.10    0.03
   2  -2   2    1.09    0.03
   2  -2   2    1.16    0.03
   2  -2   2    1.10    0.03
  -2  -2  -2    1.10    0.03
  -2  -2  -2    1.14    0.03
   2   2   2    1.15    0.03
  -2   2  -2    1.13    0.03
   2   2   2    1.08    0.03
   3  -2   2    9.53    0.21
   3  -2   2    9.24    0.20
  -3  -2  -2    9.14    0.20
   3  -2   2    9.38    0.19
   3  -2   2    9.71    0.20
  -3  -2  -2    8.99    0.19
  -3   2  -2    9.46    0.22
   3   2   2    9.42    0.21
   3   2   2    9.24    0.21
   4  -2   2    0.54    0.02
   4  -2   2    0.57    0.02
   4  -2   2    0.54    0.02
  -4  -2  -2    0.56    0.02
  -4  -2  -2    0.54    0.02
   4  -2   2    0.54    0.02
  -4   2  -2    0.58    0.02
   4   2   2    0.55    0.02
   4   2   2    0.56    0.02
   5  -2   2    3.68    0.08
   5  -2   2    3.60    0.08
  -5  -2  -2    3.49    0.08
   5  -2   2    3.58    0.08
   5  -2   2    3.60    0.09
   5  -2   2    3.55    0.09
  -5   2  -2    3.69    0.09
   5   2   2    3.62    0.09
   5   2   2    3.50    0.08
   6  -2   2   81.21    1.68
   6  -2   2   80.59    1.84
   6  -2   2   80.16    1.67
   6  -2   2   79.39    1.76
   6  -2   2   81.51    1.62
  -6   2  -2   78.98    1.86
   6   2   2   80.33    1.76
   7  -2   2    4.98    0.12
   7   2   2    4.87    0.12
  -8  -2  -2    6.55    0.12
   8  -2   2    6.58    0.12
   8  -2   2    6.35    0.15
  -8   2  -2    6.35    0.12
  -8   2  -2    6.41    0.13
   8   2   2    6.59    0.12
   8   2   2    6.35    0.15
   9  -2   2   35.82    0.66
  -9   2  -2   36.48    0.66
   9   2   2   36.23    0.66
  -9   2  -2   37.05    0.67
  10  -2   2    2.41    0.05
 -10   2  -2    2.37    0.05
 -10   2  -2    2.41    0.05
 -10   2  -2    2.44    0.05
 -11  -2  -2    1.10    0.03
  11  -2   2    1.17    0.03
 -11   2  -2    1.15    0.03
 -11   2  -2    1.09    0.03
 -11   2  -2    1.13    0.03
 -12  -2  -2    0.04    0.01
 -12  -2  -2    0.04    0.01
 -12   2  -2    0.05    0.01
 -12   2  -2    0.03    0.01
 -12  -3   2    0.13    0.01
  12  -3  -2    0.10    0.01
 -12   3   2    0.12    0.01
 -12   3   2    0.12    0.01
 -11  -3   2    0.04    0.01
  11  -3  -2    0.04    0.01
 -11   3   2    0.04    0.01
 -11   3   2    0.04    0.01
  10  -3  -2    0.13    0.01
 -10  -3   2    0.11    0.01
 -10  -3   2    0.11    0.01
 -10   3   2    0.12    0.01
 -10   3   2    0.11    0.01
  -9  -3   2    1.81    0.05
  -9   3   2    1.74    0.03
   9   3  -2    1.71    0.04
  -9   3   2    1.72    0.04
  -9   3   2    1.73    0.04
  -9   3   2    1.69    0.04
   8  -3  -2    0.00    0.01
   8  -3  -2    0.02    0.01
  -8  -3   2    0.02    0.01
   8  -3  -2    0.02    0.01
   8  -3  -2    0.02    0.01
  -8   3   2    0.02    0.01
  -8   3   2    0.02    0.01
   8   3  -2    0.03    0.01
  -8   3   2    0.03    0.01
  -8   3   2    0.01    0.01
  -8   3   2    0.02    0.00
   8   3  -2    0.01    0.01
   7  -3  -2    0.16    0.01
   7  -3  -2    0.17    0.02
  -7  -3   2    0.14    0.01
   7  -3  -2    0.17    0.01
   7  -3  -2    0.17    0.02
   7   3  -2    0.17    0.01
   7   3  -2    0.18    0.01
   7   3  -2    0.16    0.02
   6  -3  -2    0.04    0.01
   6  -3  -2    0.05    0.01
   6  -3  -2    0.04    0.01
   6  -3  -2    0.04    0.01
   6   3  -2    0.04    0.01
   6   3  -2    0.04    0.01
   5  -3  -2    7.60    0.17
   5  -3  -2    7.80    0.18
   5  -3  -2    7.52    0.18
   5  -3  -2    7.74    0.16
   5   3  -2    7.68    0.17
   5   3  -2    7.75    0.18
   4  -3  -2    0.37    0.01
   4  -3  -2    0.37    0.01
   4  -3  -2    0.37    0.02
   4  -3  -2    0.34    0.01
   4   3  -2    0.40    0.01
   4   3  -2    0.33    0.02
   3  -3  -2    0.11    0.01
  -3  -3   2    0.07    0.01
  -3  -3   2    0.06    0.01
   3  -3  -2    0.08    0.01
   3  -3  -2    0.07    0.00
   3   3  -2    0.06    0.01
   3   3  -2    0.07    0.01
   2  -3  -2    7.91    0.16
  -2  -3   2    7.32    0.16
  -2  -3   2    7.41    0.16
   2  -3  -2    7.44    0.16
   2   3  -2    7.48    0.18
   2   3  -2    7.62    0.17
  -1  -3   2    8.51    0.18
   1  -3  -2    8.24    0.18
  -1  -3   2    8.32    0.18
   1  -3  -2    8.96    0.18
  -1  -3   2    8.36    0.17
   1   3  -2    8.58    0.20
   1   3  -2    8.26    0.20
   0  -3   2    4.12    0.09
   0  -3   2    4.13    0.09
   0  -3  -2    4.34    0.09
   0  -3   2    4.08    0.09
   0   3  -2    4.21    0.10
   0   3  -2    4.35    0.10
   1  -3   2   46.12    1.02
  -1  -3  -2   50.46    0.99
   1  -3   2   49.48    0.99
   1  -3   2   50.42    1.01
  -1  -3  -2   49.07    1.02
  -1   3  -2   50.10    1.11
   1   3   2   46.91    1.11
  -1   3  -2   46.32    1.11
   2  -3   2    0.52    0.02
   2  -3   2    0.50    0.01
   2  -3   2    0.52    0.02
  -2  -3  -2    0.52    0.02
   2  -3   2    0.48    0.02
  -2  -3  -2    0.49    0.02
  -2   3  -2    0.46    0.02
   2   3   2    0.49    0.02
   2   3   2    0.51    0.02
   3  -3   2   37.77    0.81
   3  -3   2   38.47    0.78
  -3  -3  -2   37.75    0.81
   3  -3   2   39.87    0.80
  -3  -3  -2   38.04    0.79
   3  -3   2   38.46    0.84
   3   3   2   38.69    0.88
   3   3   2   38.71    0.84
  -3   3  -2   38.50    0.89
   4  -3   2    6.28    0.14
  -4  -3  -2    6.17    0.13
   4  -3   2    6.37    0.13
   4  -3   2    6.31    0.14
  -4  -3  -2    6.23    0.14
   4  -3   2    6.23    0.14
   4   3   2    6.24    0.14
   4   3   2    6.35    0.15
  -4   3  -2    6.29    0.15
   5  -3   2    0.15    0.01
   5  -3   2    0.13    0.01
   5  -3   2    0.18    0.01
   5  -3   2    0.15    0.01
  -5  -3  -2    0.15    0.01
   5   3   2    0.14    0.01
  -5   3  -2    0.13    0.01
   6  -3   2    9.83    0.21
   6  -3   2    9.64    0.21
   6  -3   2    9.63    0.23
   6  -3   2    9.45    0.20
   6  -3   2    9.85    0.22
   6   3   2    9.70    0.22
  -6   3  -2    9.67    0.23
   7  -3   2    4.34    0.11
   7  -3   2    4.31    0.10
  -7  -3  -2    4.32    0.09
   7   3   2    4.45    0.10
  -7   3  -2    4.27    0.08
  -8  -3  -2    0.19    0.01
   8  -3   2    0.18    0.01
  -8   3  -2    0.17    0.01
  -8   3  -2    0.17    0.01
  -8   3  -2    0.19    0.01
   9  -3   2   21.17    0.40
  -9  -3  -2   21.41    0.40
  -9   3  -2   22.51    0.39
  -9   3  -2   22.11    0.40
  -9   3  -2   21.77    0.40
  -9   3  -2   21.95    0.39
  10  -3   2    0.67    0.02
 -10   3  -2    0.63    0.02
 -10   3  -2    0.63    0.02
 -10   3  -2    0.67    0.02
  11  -3   2    2.40    0.05
 -11   3  -2    2.36    0.05
 -11   3  -2    2.41    0.04
 -11   3  -2    2.33    0.05
 -12  -3  -2    7.68    0.14
  12   3   2    7.83    0.14
 -12   3  -2    7.89    0.15
 -12   3  -2    7.67    0.14
 -12   4   2    0.02    0.00
  11  -4  -2    0.01    0.01
 -11  -4   2    0.01    0.01
 -11   4   2    0.01    0.01
 -11   4   2    0.02    0.01
 -10   4   2    0.01    0.01
 -10   4   2   -0.01    0.01
  -9   4   2    0.01    0.01
  -9   4   2    0.00    0.01
  -9   4   2    0.01    0.01
  -9   4   2    0.01    0.01
  -8  -4   2    0.15    0.01
  -8  -4   2    0.15    0.01
  -8   4   2    0.16    0.01
  -8   4   2    0.16    0.01
  -8   4   2    0.14    0.01
  -8   4   2    0.14    0.01
  -8   4   2    0.16    0.01
   7  -4  -2    0.09    0.01
   7  -4  -2    0.08    0.01
   7  -4  -2    0.07    0.01
  -7  -4   2    0.09    0.01
   7  -4  -2    0.09    0.01
   7   4  -2    0.08    0.01
  -7   4   2    0.10    0.01
   7   4  -2    0.08    0.01
  -7   4   2    0.09    0.01
  -7   4   2    0.07    0.01
  -7   4   2    0.08    0.00
  -7   4   2    0.09    0.01
   7   4  -2    0.08    0.01
  -7   4   2    0.09    0.01
  -7   4   2    0.07    0.01
   6  -4  -2    0.62    0.03
   6  -4  -2    0.64    0.03
   6  -4  -2    0.64    0.02
   6  -4  -2    0.63    0.02
   6   4  -2    0.64    0.02
   6   4  -2    0.62    0.03
   5  -4  -2    0.05    0.01
   5  -4  -2    0.06    0.01
   5  -4  -2    0.05    0.01
   5   4  -2    0.05    0.01
   5   4  -2    0.04    0.01
  -4  -4   2    8.02    0.17
   4  -4  -2    8.23    0.18
   4  -4  -2    8.33    0.18
   4  -4  -2    8.34    0.17
   4  -4  -2    8.17    0.19
   4   4  -2    8.04    0.19
   4   4  -2    8.24    0.18
   3  -4  -2    1.30    0.03
   3  -4  -2    1.31    0.03
  -3  -4   2    1.30    0.03
   3  -4  -2    1.35    0.04
   3  -4  -2    1.32    0.03
  -3  -4   2    1.30    0.03
   3   4  -2    1.34    0.03
   3   4  -2    1.32    0.04
   2  -4  -2   10.69    0.21
  -2  -4   2   10.19    0.21
   2  -4  -2   10.19    0.21
   2  -4  -2    9.89    0.21
  -2  -4   2   10.04    0.21
  -2  -4   2    9.99    0.22
   2   4  -2   10.12    0.24
  -1  -4   2    0.89    0.02
  -1  -4   2    0.93    0.02
  -1  -4   2    0.90    0.03
   1  -4  -2    0.97    0.03
   1  -4  -2    0.98    0.02
   1  -4  -2    0.96    0.02
   1   4  -2    0.89    0.03
   0  -4   2   15.48    0.32
   0  -4  -2   15.63    0.32
   0  -4  -2   14.97    0.31
   0  -4   2   15.27    0.31
   0  -4   2   14.81    0.32
   0   4  -2   14.82    0.35
   0   4  -2   15.30    0.35
   1  -4   2   26.81    0.54
   1  -4   2   26.08    0.56
  -1  -4  -2   26.46    0.56
   1  -4   2   26.87    0.55
  -1  -4  -2   26.87    0.54
   1   4   2   26.22    0.60
  -1   4  -2   26.04    0.61
  -2  -4  -2    4.11    0.09
   2  -4   2    4.13    0.09
   2  -4   2    4.11    0.09
   2  -4   2    4.05    0.09
  -2  -4  -2    4.18    0.09
  -2   4  -2    4.05    0.10
   2   4   2    4.06    0.10
  -3  -4  -2   13.08    0.27
  -3  -4  -2   12.82    0.28
   3  -4   2   13.01    0.29
   3  -4   2   13.64    0.28
   3  -4   2   13.01    0.28
   3  -4   2   12.91    0.27
  -3   4  -2   12.77    0.31
   3   4   2   13.07    0.29
   3   4   2   13.10    0.30
   4  -4   2   22.74    0.51
  -4  -4  -2   23.13    0.47
   4  -4   2   23.50    0.49
   4  -4   2   22.84    0.48
   4  -4   2   22.69    0.47
  -4  -4  -2   23.31    0.49
   4   4   2   23.15    0.50
  -4   4  -2   22.98    0.53
   4   4   2   23.00    0.53
   5  -4   2    0.31    0.02
   5  -4   2    0.30    0.02
  -5  -4  -2    0.30    0.02
   5  -4   2    0.30    0.01
   5  -4   2    0.31    0.01
  -5  -4  -2    0.30    0.02
  -5   4  -2    0.29    0.02
   5   4   2    0.30    0.02
   6  -4   2    4.75    0.11
   6  -4   2    4.86    0.11
   6  -4   2    4.76    0.12
   6  -4   2    4.84    0.11
   6   4   2    4.69    0.11
   7  -4   2    0.06    0.01
   7  -4   2    0.07    0.01
   7  -4   2    0.07    0.01
   7  -4   2    0.07    0.01
   7   4   2    0.07    0.01
  -7   4  -2    0.08    0.01
  -7   4  -2    0.08    0.01
  -7   4  -2    0.07    0.01
   7   4   2    0.07    0.01
  -7   4  -2    0.09    0.01
  -7   4  -2    0.07    0.01
  -8  -4  -2    0.10    0.01
   8  -4   2    0.09    0.01
  -8   4  -2    0.10    0.01
  -8   4  -2    0.09    0.01
  -8   4  -2    0.11    0.01
  -8   4  -2    0.10    0.01
   9  -4   2    0.16    0.01
  -9  -4  -2    0.16    0.01
  -9   4  -2    0.15    0.01
  -9   4  -2    0.16    0.01
   9   4   2    0.14    0.01
  -9   4  -2    0.14    0.01
  10  -4   2    0.28    0.02
  10   4   2    0.28    0.01
 -10   4  -2    0.27    0.01
 -10   4  -2    0.27    0.01
 -10   4  -2    0.26    0.01
  11  -4   2    0.01    0.01
 -11   4  -2    0.00    0.00
 -11   4  -2    0.00    0.00
 -11   4  -2   -0.01    0.00
  11   4   2    0.01    0.01
 -11  -5   2    0.01    0.01
  11  -5  -2    0.00    0.01
 -11   5   2    0.00    0.00
  11   5  -2    0.00    0.01
 -11   5   2    0.00    0.00
 -10   5   2    0.14    0.01
 -10   5   2    0.15    0.01
  10   5  -2    0.11    0.01
 -10   5   2    0.14    0.01
  -9   5   2    0.00    0.01
  -9   5   2    0.01    0.01
  -9   5   2    0.01    0.01
  -9   5   2    0.00    0.01
  -8  -5   2    0.00    0.01
  -8   5   2    0.02    0.01
  -8   5   2    0.02    0.01
  -8   5   2    0.01    0.01
  -8   5   2    0.01    0.01
  -8   5   2    0.01    0.01
  -7   5   2    0.05    0.01
  -7   5   2    0.05    0.01
  -7   5   2    0.04    0.01
  -7   5   2    0.04    0.01
  -7   5   2    0.04    0.01
   6  -5  -2    0.00    0.01
   6  -5  -2    0.02    0.01
  -6  -5   2    0.00    0.01
   6  -5  -2    0.01    0.01
   6  -5  -2   -0.01    0.01
  -6   5   2   -0.01    0.01
  -6   5   2   -0.01    0.01
   6   5  -2    0.00    0.01
  -6   5   2   -0.01    0.01
  -6   5   2    0.00    0.01
   6   5  -2    0.00    0.01
  -6   5   2    0.01    0.01
   6   5  -2    0.01    0.01
  -6   5   2   -0.01    0.01
   5  -5  -2    1.01    0.03
   5  -5  -2    1.03    0.03
   5  -5  -2    1.04    0.04
   5   5  -2    1.07    0.03
   5   5  -2    1.01    0.04
   4  -5  -2    0.01    0.01
   4  -5  -2    0.02    0.01
   4   5  -2    0.01    0.01
   3  -5  -2    4.05    0.09
   3  -5  -2    4.17    0.09
   3  -5  -2    4.16    0.09
  -3  -5   2    4.31    0.09
  -3  -5   2    4.31    0.09
   3  -5  -2    4.15    0.10
  -3  -5   2    4.27    0.10
   3   5  -2    4.23    0.10
   2  -5  -2    2.41    0.06
   2  -5  -2    2.40    0.05
   2  -5  -2    2.39    0.05
  -2  -5   2    2.43    0.06
  -2  -5   2    2.40    0.05
  -2  -5   2    2.40    0.06
   2   5  -2    2.38    0.06
   1  -5  -2   20.11    0.40
  -1  -5   2   19.86    0.41
   1  -5  -2   20.11    0.42
  -1  -5   2   19.79    0.42
   1  -5  -2   20.29    0.42
  -1  -5   2   19.83    0.42
   1   5  -2   19.65    0.46
   0  -5   2    0.18    0.01
   0  -5  -2    0.17    0.01
   0  -5   2    0.16    0.01
   0  -5  -2    0.18    0.01
   0  -5  -2    0.17    0.01
   0  -5   2    0.16    0.01
   0   5  -2    0.14    0.01
   1  -5   2    2.67    0.06
   1  -5   2    2.63    0.06
  -1  -5  -2    2.85    0.06
   1  -5   2    2.63    0.06
  -1  -5  -2    2.74    0.06
   2  -5   2    4.39    0.09
   2  -5   2    4.48    0.10
  -2  -5  -2    4.37    0.10
   2  -5   2    4.43    0.10
  -2  -5  -2    4.34    0.09
   2   5   2    4.57    0.11
  -2   5  -2    4.45    0.11
  -3  -5  -2   14.01    0.29
   3  -5   2   14.13    0.30
   3  -5   2   14.04    0.32
   3  -5   2   14.19    0.30
   3  -5   2   14.17    0.29
  -3  -5  -2   14.04    0.30
   3   5   2   14.42    0.33
  -3   5  -2   14.32    0.33
   4  -5   2    5.53    0.12
  -4  -5  -2    5.35    0.12
   4  -5   2    5.41    0.12
   4  -5   2    5.36    0.13
   4  -5   2    5.48    0.12
  -4  -5  -2    5.58    0.12
   4   5   2    5.38    0.13
  -4   5  -2    5.66    0.14
   5  -5   2    0.14    0.01
   5  -5   2    0.13    0.01
   5  -5   2    0.15    0.01
   5  -5   2    0.13    0.01
  -5  -5  -2    0.14    0.01
  -5   5  -2    0.13    0.01
   5   5   2    0.12    0.01
   6  -5   2    0.09    0.01
   6  -5   2    0.08    0.01
   6  -5   2    0.08    0.01
   6  -5   2    0.11    0.01
   6   5   2    0.14    0.01
  -6   5  -2    0.09    0.01
   6   5   2    0.08    0.01
  -6   5  -2    0.09    0.01
  -6   5  -2    0.08    0.01
  -6   5  -2    0.08    0.01
  -6   5  -2    0.07    0.01
  -7   5  -2    0.02    0.01
  -7   5  -2    0.02    0.00
  -7   5  -2    0.03    0.01
  -7   5  -2    0.04    0.01
  -7   5  -2    0.02    0.01
   7   5   2    0.03    0.01
   7   5   2    0.02    0.01
  -8  -5  -2    1.06    0.03
  -8   5  -2    1.08    0.03
  -8   5  -2    1.04    0.03
   8   5   2    1.09    0.03
  -8   5  -2    1.05    0.02
  -8   5  -2    1.06    0.03
   9  -5   2    0.05    0.01
  -9  -5  -2    0.04    0.01
  -9   5  -2    0.04    0.01
  -9   5  -2    0.06    0.01
   9   5   2    0.05    0.01
  -9   5  -2    0.06    0.01
  10  -5   2    0.05    0.01
  10   5   2    0.06    0.01
 -10   5  -2    0.07    0.01
 -10   5  -2    0.07    0.01
 -10   5  -2    0.07    0.01
  11   5   2    0.15    0.01
 -11   5  -2    0.17    0.01
  11   5   2    0.16    0.01
 -10   6   2    0.00    0.00
 -10   6   2    0.01    0.01
 -10   6   2    0.01    0.01
  10   6  -2   -0.01    0.00
  -9   6   2    0.00    0.01
  -9   6   2   -0.01    0.01
  -9   6   2    0.01    0.01
  -9   6   2    0.00    0.01
   9   6  -2    0.00    0.01
  -8  -6   2    0.00    0.01
  -8   6   2    0.00    0.01
  -8   6   2   -0.01    0.01
  -8   6   2    0.00    0.01
  -8   6   2    0.01    0.01
   8   6  -2    0.01    0.01
  -8   6   2   -0.01    0.01
  -7   6   2    0.00    0.01
  -7   6   2    0.02    0.01
  -7   6   2    0.00    0.01
  -7   6   2    0.03    0.01
  -7   6   2    0.02    0.01
   7   6  -2    0.05    0.01
  -7   6   2    0.01    0.01
   6   6  -2    0.20    0.02
  -6   6   2    0.21    0.01
  -6   6   2    0.17    0.01
   6   6  -2    0.16    0.01
  -6   6   2    0.19    0.01
  -6   6   2    0.19    0.01
  -6   6   2    0.18    0.02
  -6   6   2    0.18    0.01
  -6   6   2    0.17    0.01
   5  -6  -2    0.06    0.01
   5  -6  -2    0.07    0.01
   5  -6  -2    0.08    0.01
  -5   6   2    0.06    0.01
  -5   6   2    0.08    0.01
   5   6  -2    0.09    0.01
  -5   6   2    0.09    0.01
  -5   6   2    0.09    0.01
   5   6  -2    0.08    0.01
  -5   6   2    0.09    0.01
   5   6  -2    0.08    0.01
  -5   6   2    0.08    0.01
  -5   6   2    0.07    0.01
  -5   6   2    0.09    0.01
   5   6  -2    0.10    0.01
   4  -6  -2    2.56    0.06
   4  -6  -2    2.59    0.07
   4  -6  -2    2.58    0.06
   4  -6  -2    2.68    0.06
   4   6  -2    2.64    0.07
   3  -6  -2    1.96    0.05
  -3  -6   2    1.97    0.05
   3  -6  -2    1.97    0.05
   3  -6  -2    1.98    0.06
  -3  -6   2    2.00    0.05
   3  -6  -2    2.06    0.05
  -3  -6   2    2.02    0.05
   3   6  -2    2.00    0.06
   2  -6  -2    6.46    0.14
   2  -6  -2    6.45    0.14
   2  -6  -2    6.40    0.14
  -2  -6   2    6.68    0.15
  -2  -6   2    6.67    0.14
  -2  -6   2    6.66    0.14
   2   6  -2    6.67    0.16
  -1  -6   2    3.71    0.08
  -1  -6   2    3.73    0.09
   1  -6  -2    3.75    0.08
   1  -6  -2    3.61    0.08
  -1  -6   2    3.75    0.09
   1  -6  -2    3.75    0.09
   1   6  -2    3.72    0.09
   0  -6   2    4.14    0.10
   0  -6  -2    4.19    0.09
   0  -6  -2    4.21    0.10
   0  -6  -2    4.28    0.09
   0  -6   2    4.26    0.09
   0  -6   2    4.11    0.09
   1  -6   2    0.58    0.02
   1  -6   2    0.60    0.02
  -1  -6  -2    0.61    0.02
   1  -6   2    0.60    0.02
  -1  -6  -2    0.62    0.02
  -1  -6  -2    0.58    0.02
   2  -6   2    1.23    0.04
  -2  -6  -2    1.27    0.03
   2  -6   2    1.24    0.03
  -2  -6  -2    1.25    0.03
   2  -6   2    1.24    0.03
   3  -6   2    5.87    0.13
   3  -6   2    5.97    0.14
  -3  -6  -2    5.84    0.13
  -3  -6  -2    5.95    0.13
   3  -6   2    6.00    0.13
   3  -6   2    5.85    0.13
   3   6   2    5.91    0.14
  -4  -6  -2   11.88    0.24
  -4  -6  -2   11.68    0.25
   4  -6   2   11.79    0.25
   4  -6   2   11.67    0.24
   4  -6   2   11.38    0.26
   4  -6   2   11.61    0.25
   4   6   2   11.54    0.21
  -5  -6  -2    2.77    0.07
   5  -6   2    2.86    0.07
   5  -6   2    2.93    0.07
   5  -6   2    2.88    0.08
   5  -6   2    2.84    0.07
  -5   6  -2    2.83    0.06
   5   6   2    2.87    0.06
   5   6   2    2.91    0.07
   5   6   2    2.83    0.06
  -5   6  -2    2.82    0.06
  -5   6  -2    2.90    0.06
  -5   6  -2    2.94    0.06
  -5   6  -2    2.86    0.07
   5   6   2    2.87    0.06
   5   6   2    2.66    0.06
  -5   6  -2    2.83    0.06
  -5   6  -2    2.92    0.05
  -5   6  -2    2.83    0.06
  -6   6  -2    0.89    0.03
   6   6   2    0.84    0.03
  -6   6  -2    0.85    0.03
  -6   6  -2    0.82    0.03
  -6   6  -2    0.88    0.02
  -6   6  -2    0.88    0.03
   6   6   2    0.85    0.02
  -6   6  -2    0.85    0.02
   6   6   2    0.83    0.03
  -6   6  -2    0.83    0.03
  -6   6  -2    0.85    0.03
   6   6   2    0.80    0.02
  -7   6  -2    0.24    0.01
  -7   6  -2    0.22    0.01
  -7   6  -2    0.25    0.02
  -7   6  -2    0.28    0.02
  -7   6  -2    0.24    0.01
  -7   6  -2    0.25    0.01
   7   6   2    0.24    0.01
   7   6   2    0.23    0.02
  -7   6  -2    0.24    0.01
  -7   6  -2    0.23    0.02
   7   6   2    0.27    0.02
  -8  -6  -2    0.10    0.01
   8   6   2    0.09    0.01
  -8   6  -2    0.11    0.01
  -8   6  -2    0.08    0.01
  -8   6  -2    0.09    0.01
  -8   6  -2    0.11    0.01
  -8   6  -2    0.09    0.01
  -9  -6  -2    0.27    0.01
  -9   6  -2    0.29    0.02
   9   6   2    0.28    0.01
  -9   6  -2    0.25    0.01
  -9   6  -2    0.26    0.01
   9   6   2    0.26    0.01
  -9   6  -2    0.26    0.01
  10   6   2    0.35    0.01
 -10   6  -2    0.35    0.01
 -10   6  -2    0.37    0.01
 -10   7   2    0.04    0.01
  10   7  -2    0.05    0.00
 -10   7   2    0.04    0.01
 -10   7   2    0.04    0.00
  -9   7   2    0.18    0.01
   9   7  -2    0.17    0.01
  -9   7   2    0.17    0.01
   9   7  -2    0.17    0.01
  -9   7   2    0.19    0.01
  -8  -7   2    0.20    0.01
   8   7  -2    0.20    0.01
  -8   7   2    0.20    0.01
  -8   7   2    0.19    0.01
  -8   7   2    0.22    0.01
  -8   7   2    0.21    0.02
  -8   7   2    0.20    0.01
  -8   7   2    0.20    0.01
  -7   7   2    0.57    0.02
  -7   7   2    0.58    0.02
  -7   7   2    0.55    0.02
  -7   7   2    0.55    0.02
  -7   7   2    0.53    0.02
   7   7  -2    0.56    0.02
  -7   7   2    0.55    0.02
  -6   7   2    0.37    0.02
  -6   7   2    0.37    0.02
  -6   7   2    0.38    0.02
  -6   7   2    0.42    0.02
  -6   7   2    0.39    0.02
  -6   7   2    0.40    0.02
   6   7  -2    0.35    0.02
   6   7  -2    0.40    0.02
  -6   7   2    0.37    0.02
   5   7  -2    0.72    0.03
  -5   7   2    0.71    0.02
  -5   7   2    0.73    0.03
  -5   7   2    0.75    0.02
  -5   7   2    0.74    0.03
  -5   7   2    0.73    0.03
  -5   7   2    0.74    0.02
   5   7  -2    0.73    0.02
  -5   7   2    0.74    0.03
  -5   7   2    0.70    0.02
   4  -7  -2    0.15    0.01
  -4   7   2    0.18    0.02
  -4   7   2    0.17    0.01
  -4   7   2    0.15    0.01
   4   7  -2    0.16    0.01
  -4   7   2    0.17    0.01
   4   7  -2    0.16    0.01
  -4   7   2    0.16    0.01
  -4   7   2    0.17    0.01
  -4   7   2    0.17    0.01
  -4   7   2    0.17    0.01
   4   7  -2    0.16    0.01
   3  -7  -2    0.75    0.03
   3  -7  -2    0.76    0.02
   3  -7  -2    0.74    0.02
   3  -7  -2    0.76    0.03
  -3  -7   2    0.71    0.02
  -3   7   2    0.73    0.03
   3   7  -2    0.76    0.02
   3   7  -2    0.76    0.02
  -3   7   2    0.75    0.03
   3   7  -2    0.74    0.03
  -3   7   2    0.75    0.02
  -3   7   2    0.74    0.02
   3   7  -2    0.78    0.03
   3   7  -2    0.73    0.03
  -3   7   2    0.79    0.02
  -3   7   2    0.76    0.03
   3   7  -2    0.73    0.02
  -3   7   2    0.75    0.02
  -3   7   2    0.78    0.02
  -2  -7   2    0.06    0.01
   2  -7  -2    0.08    0.01
  -2  -7   2    0.07    0.01
   2  -7  -2    0.06    0.01
   2  -7  -2    0.08    0.01
  -2  -7   2    0.05    0.01
   2   7  -2    0.05    0.01
   2   7  -2    0.07    0.01
   2   7  -2    0.07    0.01
  -2   7   2    0.07    0.01
   1  -7  -2    0.04    0.01
  -1  -7   2    0.03    0.01
  -1  -7   2    0.04    0.01
   1  -7  -2    0.04    0.01
   1  -7  -2    0.03    0.01
  -1  -7   2    0.04    0.01
   1   7  -2    0.04    0.00
   0  -7   2    1.64    0.04
   0  -7  -2    1.57    0.04
   0  -7  -2    1.53    0.04
   0  -7   2    1.61    0.04
   0  -7   2    1.57    0.04
   0  -7  -2    1.57    0.04
   0   7  -2    1.52    0.03
   1  -7   2    0.20    0.01
  -1  -7  -2    0.21    0.01
   1  -7   2    0.17    0.01
  -1  -7  -2    0.19    0.01
  -1  -7  -2    0.19    0.01
   1  -7   2    0.19    0.01
  -1   7  -2    0.22    0.01
  -2  -7  -2    0.75    0.02
   2  -7   2    0.78    0.03
  -2  -7  -2    0.75    0.03
  -2  -7  -2    0.77    0.02
   2  -7   2    0.77    0.03
   2  -7   2    0.75    0.03
   2  -7   2    0.77    0.02
  -2   7  -2    0.72    0.02
  -2   7  -2    0.73    0.03
   2   7   2    0.77    0.02
   2   7   2    0.74    0.03
   2   7   2    0.74    0.02
   2   7   2    0.75    0.02
  -3  -7  -2    0.02    0.01
   3  -7   2    0.01    0.01
  -3  -7  -2    0.01    0.01
   3  -7   2    0.02    0.01
   3  -7   2    0.01    0.01
   3  -7   2    0.02    0.01
  -3  -7  -2    0.01    0.01
  -3   7  -2    0.01    0.01
   3   7   2    0.02    0.01
  -3   7  -2    0.01    0.01
   3   7   2    0.02    0.00
  -3   7  -2    0.01    0.01
  -3   7  -2    0.01    0.01
  -3   7  -2    0.03    0.01
   3   7   2    0.03    0.01
  -3   7  -2    0.01    0.01
   3   7   2    0.02    0.01
  -3   7  -2    0.01    0.00
  -3   7  -2    0.02    0.01
   3   7   2    0.03    0.01
   4   7   2    0.44    0.02
  -4   7  -2    0.40    0.02
  -4   7  -2    0.43    0.02
   4   7   2    0.43    0.02
   4   7   2    0.42    0.01
  -4   7  -2    0.44    0.02
   4   7   2    0.41    0.02
  -4   7  -2    0.43    0.01
  -4   7  -2    0.41    0.02
  -4   7  -2    0.41    0.02
  -4   7  -2    0.41    0.02
  -4   7  -2    0.43    0.02
  -5   7  -2    1.58    0.04
   5   7   2    1.55    0.04
  -5   7  -2    1.53    0.04
   5   7   2    1.49    0.03
   5   7   2    1.55    0.04
  -5   7  -2    1.54    0.04
  -5   7  -2    1.52    0.04
  -5   7  -2    1.49    0.04
  -5   7  -2    1.55    0.04
   5   7   2    1.53    0.04
  -6   7  -2    0.10    0.01
   6   7   2    0.08    0.01
  -6   7  -2    0.09    0.01
  -6   7  -2    0.10    0.02
  -6   7  -2    0.06    0.01
   6   7   2    0.10    0.01
  -6   7  -2    0.10    0.01
   6   7   2    0.08    0.01
  -6   7  -2    0.12    0.01
  -7   7  -2    0.03    0.01
   7   7   2    0.01    0.01
  -7   7  -2    0.03    0.01
  -7   7  -2    0.04    0.01
  -7   7  -2    0.04    0.01
  -7   7  -2    0.03    0.01
  -7   7  -2    0.02    0.01
   7   7   2    0.02    0.01
  -8  -7  -2    0.05    0.01
  -8   7  -2    0.06    0.01
  -8   7  -2    0.05    0.01
  -8   7  -2    0.04    0.01
   8   7   2    0.05    0.01
  -8   7  -2    0.05    0.01
  -9  -7  -2    1.07    0.02
  -9   7  -2    1.00    0.03
   9   7   2    1.07    0.02
  -9   7  -2    1.05    0.03
  -9   7  -2    1.07    0.03
 -10   7  -2    1.05    0.02
  -9   8   2    0.09    0.01
  -9   8   2    0.08    0.01
   9   8  -2    0.09    0.01
  -9   8   2    0.09    0.01
  -8  -8   2    0.00    0.00
  -8   8   2    0.01    0.01
  -8   8   2    0.00    0.01
   8   8  -2    0.00    0.00
  -8   8   2    0.00    0.01
  -8   8   2    0.00    0.00
  -8   8   2    0.00    0.01
  -8   8   2    0.00    0.01
  -7   8   2    0.06    0.01
   7   8  -2    0.08    0.01
  -7   8   2    0.07    0.01
  -7   8   2    0.09    0.01
  -7   8   2    0.07    0.01
  -7   8   2    0.06    0.01
  -7   8   2    0.08    0.01
  -7   8   2    0.08    0.01
   6   8  -2    0.22    0.01
  -6   8   2    0.23    0.02
  -6   8   2    0.23    0.01
  -6   8   2    0.21    0.01
  -6   8   2    0.22    0.02
   6   8  -2    0.23    0.01
  -6   8   2    0.22    0.01
  -6   8   2    0.26    0.01
   6   8  -2    0.27    0.01
  -6   8   2    0.22    0.02
  -5   8   2    0.19    0.02
  -5   8   2    0.20    0.01
  -5   8   2    0.21    0.02
  -5   8   2    0.18    0.01
   5   8  -2    0.22    0.02
   5   8  -2    0.21    0.01
  -5   8   2    0.20    0.01
  -5   8   2    0.20    0.01
  -5   8   2    0.18    0.01
   5   8  -2    0.20    0.01
  -5   8   2    0.20    0.01
  -4   8   2    0.21    0.02
  -4   8   2    0.21    0.01
  -4   8   2    0.22    0.02
  -4   8   2    0.20    0.02
  -4   8   2    0.19    0.02
   4   8  -2    0.20    0.01
   4   8  -2    0.23    0.02
  -4   8   2    0.23    0.01
  -4   8   2    0.22    0.01
  -4   8   2    0.22    0.01
   4   8  -2    0.23    0.01
   4   8  -2    0.21    0.02
  -3   8   2    0.27    0.01
  -3   8   2    0.31    0.01
   3   8  -2    0.28    0.01
  -3   8   2    0.27    0.01
  -3   8   2    0.30    0.02
  -3   8   2    0.28    0.02
  -3   8   2    0.28    0.02
   3   8  -2    0.27    0.02
   3   8  -2    0.28    0.02
  -3   8   2    0.27    0.01
  -3   8   2    0.27    0.02
  -2  -8   2    0.85    0.03
   2   8  -2    0.81    0.03
   2   8  -2    0.82    0.03
   2   8  -2    0.86    0.02
  -2   8   2    0.87    0.03
  -2   8   2    0.89    0.03
  -2   8   2    0.81    0.03
  -2   8   2    0.80    0.03
  -2   8   2    0.85    0.03
  -2   8   2    0.84    0.03
   2   8  -2    0.86    0.03
  -2   8   2    0.87    0.03
   2   8  -2    0.87    0.03
  -1  -8   2    0.03    0.01
  -1   8   2    0.03    0.01
  -1   8   2    0.02    0.01
   1   8  -2    0.02    0.01
  -1   8   2    0.03    0.01
   1   8  -2    0.01    0.01
  -1   8   2    0.02    0.01
  -1   8   2    0.02    0.01
  -1   8   2    0.03    0.01
   1   8  -2    0.03    0.01
   1   8  -2    0.04    0.01
  -1   8   2    0.01    0.01
   1   8  -2    0.03    0.01
   0  -8   2    0.01    0.01
   0   8   2    0.01    0.01
   0   8   2    0.03    0.01
   0   8  -2    0.01    0.01
   0   8   2    0.03    0.01
   0   8  -2    0.02    0.00
   0   8   2    0.02    0.01
   0   8   2    0.03    0.01
   0   8   2    0.03    0.01
   0   8  -2    0.03    0.01
   0   8  -2    0.01    0.01
   0   8  -2    0.01    0.01
   1   8   2    0.22    0.01
  -1   8  -2    0.22    0.02
   1   8   2    0.21    0.02
  -1   8  -2    0.24    0.01
  -1   8  -2    0.21    0.02
   1   8   2    0.20    0.02
   1   8   2    0.22    0.02
  -1   8  -2    0.22    0.01
  -1   8  -2    0.21    0.02
   1   8   2    0.21    0.01
  -1   8  -2    0.21    0.01
  -2   8  -2    0.74    0.02
   2   8   2    0.73    0.03
   2   8   2    0.71    0.02
  -2   8  -2    0.74    0.03
   2   8   2    0.72    0.02
   2   8   2    0.76    0.03
   2   8   2    0.72    0.02
  -2   8  -2    0.74    0.02
  -2   8  -2    0.75    0.03
   2   8   2    0.78    0.03
  -2   8  -2    0.71    0.03
  -2   8  -2    0.74    0.02
   3   8   2    0.85    0.03
  -3   8  -2    0.84    0.03
   3   8   2    0.85    0.03
  -3   8  -2    0.88    0.03
  -3   8  -2    0.82    0.02
  -3   8  -2    0.85    0.02
  -3   8  -2    0.87    0.03
   3   8   2    0.86    0.03
  -3   8  -2    0.82    0.03
  -3   8  -2    0.85    0.03
   3   8   2    0.88    0.02
   4   8   2    1.41    0.04
  -4   8  -2    1.39    0.04
  -4   8  -2    1.36    0.04
   4   8   2    1.36    0.04
  -4   8  -2    1.34    0.03
   4   8   2    1.38    0.03
  -4   8  -2    1.42    0.04
   4   8   2    1.35    0.04
  -4   8  -2    1.39    0.03
  -4   8  -2    1.43    0.03
   4   8   2    1.31    0.03
  -4   8  -2    1.38    0.04
   5   8   2    0.23    0.01
  -5   8  -2    0.26    0.02
  -5   8  -2    0.23    0.02
  -5   8  -2    0.22    0.01
  -5   8  -2    0.22    0.01
   5   8   2    0.23    0.02
   5   8   2    0.20    0.02
  -5   8  -2    0.22    0.01
  -5   8  -2    0.21    0.02
   6   8   2    0.17    0.01
  -6   8  -2    0.16    0.01
  -6   8  -2    0.15    0.02
  -6   8  -2    0.19    0.01
  -6   8  -2    0.18    0.01
  -6   8  -2    0.19    0.01
   6   8   2    0.18    0.01
  -6   8  -2    0.19    0.01
   6   8   2    0.20    0.01
  -7   8  -2    0.22    0.01
  -7   8  -2    0.23    0.01
   7   8   2    0.22    0.01
  -7   8  -2    0.22    0.01
  -7   8  -2    0.20    0.01
  -7   8  -2    0.19    0.01
   7   8   2    0.21    0.01
  -7   8  -2    0.21    0.02
  -8  -8  -2    0.23    0.01
  -8   8  -2    0.23    0.01
  -8   8  -2    0.21    0.01
  -8   8  -2    0.21    0.01
  -8   8  -2    0.22    0.01
  -8   8  -2    0.23    0.01
  -9   8  -2    0.10    0.01
  -8   9   2    0.02    0.00
  -8   9   2    0.01    0.01
  -7  -9   2    0.01    0.00
  -7   9   2    0.02    0.01
  -7   9   2    0.01    0.00
  -7   9   2    0.01    0.01
  -7   9   2    0.03    0.01
  -7   9   2    0.03    0.01
  -7   9   2    0.01    0.01
  -7   9   2    0.02    0.01
  -6   9   2    0.01    0.01
  -6   9   2    0.01    0.00
  -6   9   2    0.01    0.01
  -6   9   2    0.01    0.01
  -6   9   2    0.02    0.01
   6   9  -2    0.01    0.00
  -6   9   2    0.02    0.01
  -6   9   2    0.01    0.01
  -5   9   2    0.81    0.02
  -5   9   2    0.83    0.02
  -5   9   2    0.80    0.02
  -5   9   2    0.85    0.03
  -5   9   2    0.82    0.03
  -5   9   2    0.85    0.02
  -5   9   2    0.83    0.03
   5   9  -2    0.79    0.02
  -5   9   2    0.84    0.02
   5   9  -2    0.83    0.02
  -4   9   2    0.01    0.01
  -4   9   2    0.01    0.01
   4   9  -2    0.00    0.00
  -4   9   2   -0.01    0.01
  -4   9   2    0.01    0.01
   4   9  -2    0.01    0.01
   4   9  -2    0.01    0.01
  -4   9   2    0.00    0.01
  -4   9   2    0.01    0.01
  -4   9   2    0.00    0.01
  -4   9   2    0.01    0.01
  -3   9   2    0.07    0.01
   3   9  -2    0.04    0.00
  -3   9   2    0.03    0.01
  -3   9   2    0.04    0.01
   3   9  -2    0.05    0.01
  -3   9   2    0.05    0.01
  -3   9   2    0.06    0.01
   3   9  -2    0.05    0.01
  -3   9   2    0.05    0.01
  -3   9   2    0.05    0.01
  -2   9   2   -0.01    0.01
   2   9  -2    0.00    0.01
  -2   9   2    0.02    0.01
  -2   9   2    0.00    0.01
   2   9  -2    0.01    0.00
  -2   9   2    0.01    0.01
   2   9  -2    0.01    0.01
   2   9  -2    0.00    0.00
   2   9  -2   -0.01    0.01
  -2   9   2    0.00    0.01
  -2   9   2    0.01    0.01
  -2   9   2    0.00    0.01
  -1  -9   2    1.72    0.05
  -1   9   2    1.87    0.04
  -1   9   2    1.88    0.04
  -1   9   2    1.85    0.04
  -1   9   2    1.77    0.04
   1   9  -2    1.87    0.04
  -1   9   2    1.93    0.05
   1   9  -2    1.94    0.04
  -1   9   2    1.91    0.05
   1   9  -2    1.92    0.05
  -1   9   2    1.89    0.04
   0  -9   2    0.66    0.02
   0   9  -2    0.64    0.02
   0   9   2    0.60    0.02
   0   9   2    0.62    0.02
   0   9  -2    0.62    0.02
   0   9   2    0.63    0.02
   0   9  -2    0.65    0.02
   0   9   2    0.61    0.02
   0   9   2    0.67    0.02
   0   9  -2    0.64    0.02
   0   9   2    0.60    0.02
   1  -9   2    0.33    0.02
   1   9   2    0.33    0.02
   1   9   2    0.31    0.02
   1   9   2    0.33    0.01
  -1   9  -2    0.34    0.02
   1   9   2    0.35    0.02
  -1   9  -2    0.33    0.02
  -1   9  -2    0.35    0.02
   1   9   2    0.28    0.02
  -1   9  -2    0.33    0.02
   1   9   2    0.34    0.02
  -1   9  -2    0.32    0.02
   2  -9   2    0.05    0.01
  -2   9  -2    0.07    0.01
  -2   9  -2    0.07    0.01
   2   9   2    0.06    0.01
   2   9   2    0.06    0.01
   2   9   2    0.07    0.01
   2   9   2    0.07    0.01
  -2   9  -2    0.06    0.01
   2   9   2    0.07    0.01
  -2   9  -2    0.07    0.01
  -2   9  -2    0.09    0.01
  -3   9  -2    0.02    0.01
  -3   9  -2    0.02    0.01
   3   9   2    0.03    0.01
  -3   9  -2    0.02    0.01
  -3   9  -2    0.02    0.01
   3   9   2    0.02    0.01
   3   9   2    0.02    0.01
  -3   9  -2    0.01    0.01
  -3   9  -2   -0.01    0.01
   3   9   2    0.01    0.01
  -4   9  -2    0.25    0.02
   4   9   2    0.30    0.02
  -4   9  -2    0.24    0.01
  -4   9  -2    0.27    0.01
  -4   9  -2    0.26    0.01
  -4   9  -2    0.27    0.02
  -4   9  -2    0.25    0.02
   4   9   2    0.26    0.02
  -4   9  -2    0.27    0.01
   4   9   2    0.24    0.01
  -5   9  -2    0.00    0.01
  -5   9  -2    0.00    0.01
  -5   9  -2   -0.01    0.01
  -5   9  -2   -0.01    0.00
  -5   9  -2   -0.01    0.00
   5   9   2   -0.01    0.01
  -5   9  -2    0.00    0.01
   6   9   2    0.02    0.01
  -6   9  -2    0.01    0.01
  -6   9  -2    0.01    0.01
  -6   9  -2    0.01    0.00
  -6   9  -2   -0.01    0.01
  -6   9  -2    0.01    0.01
  -6   9  -2    0.00    0.00
  -7  -9  -2    0.00    0.00
  -7   9  -2    0.01    0.01
  -7   9  -2    0.00    0.00
  -7   9  -2    0.01    0.00
  -7   9  -2    0.00    0.00
  -7   9  -2    0.01    0.01
  -7   9  -2    0.00    0.01
  -8   9  -2    0.02    0.01
  -6  10   2    0.00    0.00
  -6  10   2    0.00    0.01
  -6  10   2    0.00    0.01
  -6  10   2    0.00    0.01
  -6  10   2    0.00    0.01
  -6  10   2    0.01    0.00
  -6  10   2    0.00    0.00
  -5  10   2    0.02    0.01
  -5  10   2    0.01    0.01
  -5  10   2    0.02    0.01
  -5  10   2    0.03    0.01
  -5  10   2    0.01    0.01
  -5  10   2    0.02    0.01
  -5  10   2    0.03    0.01
  -4  10   2    0.04    0.01
  -4  10   2    0.03    0.01
  -4  10   2    0.03    0.01
  -4  10   2    0.04    0.01
  -4  10   2    0.02    0.01
  -4  10   2    0.05    0.01
  -4  10   2    0.04    0.01
  -3  10   2    0.07    0.01
  -3  10   2    0.07    0.01
  -3  10   2    0.08    0.01
  -3  10   2    0.08    0.01
  -3  10   2    0.06    0.01
  -3  10   2    0.07    0.01
   3  10  -2    0.08    0.01
  -3  10   2    0.07    0.01
  -2  10   2    0.13    0.01
  -2  10   2    0.14    0.01
  -2  10   2    0.15    0.01
  -2  10   2    0.15    0.01
  -2  10   2    0.17    0.01
   2  10  -2    0.15    0.01
  -2  10   2    0.15    0.01
  -2  10   2    0.16    0.01
   1  10  -2    0.10    0.01
  -1  10   2    0.10    0.01
  -1  10   2    0.13    0.01
  -1  10   2    0.11    0.01
  -1  10   2    0.10    0.01
   1  10  -2    0.09    0.01
  -1  10   2    0.09    0.01
  -1  10   2    0.11    0.01
   0 -10   2    0.01    0.01
   0  10  -2    0.00    0.01
   0  10   2    0.01    0.01
   0  10  -2    0.00    0.01
   0  10  -2    0.00    0.01
   0  10   2    0.01    0.01
   0  10   2    0.01    0.01
   0  10   2    0.01    0.00
   0  10  -2   -0.01    0.01
   0  10  -2    0.01    0.01
   0  10   2    0.01    0.01
   0  10   2    0.00    0.01
   1 -10   2    0.08    0.01
   1  10   2    0.09    0.01
   1  10   2    0.10    0.01
  -1  10  -2    0.08    0.01
   1  10   2    0.08    0.01
  -1  10  -2    0.10    0.01
   1  10   2    0.09    0.01
  -1  10  -2    0.09    0.01
   1  10   2    0.09    0.01
  -1  10  -2    0.09    0.01
  -2  10  -2    0.83    0.02
   2  10   2    0.80    0.02
   2  10   2    0.80    0.02
  -2  10  -2    0.82    0.02
  -2  10  -2    0.82    0.02
   2  10   2    0.77    0.02
  -2  10  -2    0.79    0.02
   2  10   2    0.80    0.02
  -2  10  -2    0.81    0.02
   3 -10   2    0.06    0.01
  -3  10  -2    0.06    0.01
  -3  10  -2    0.05    0.01
   3  10   2    0.07    0.01
   3  10   2    0.05    0.01
  -3  10  -2    0.04    0.01
  -3  10  -2    0.07    0.01
  -3  10  -2    0.07    0.01
   3  10   2    0.06    0.01
   3  10   2    0.05    0.01
   4 -10   2    0.04    0.01
  -4  10  -2    0.04    0.01
  -4  10  -2    0.05    0.01
  -4  10  -2    0.04    0.01
   4  10   2    0.04    0.01
  -4  10  -2    0.05    0.01
  -4  10  -2    0.06    0.01
   5 -10   2    0.00    0.01
  -5  10  -2    0.00    0.01
  -5  10  -2    0.00    0.00
   5  10   2    0.00    0.01
  -5  10  -2    0.00    0.01
  -5  10  -2    0.00    0.00
   6 -10   2   -0.01    0.00
  -6  10  -2    0.00    0.00
  -6  10  -2    0.00    0.01
  -6  10  -2    0.00    0.00
  -6  10  -2    0.00    0.00
  -4  11   2   -0.01    0.00
  -4  11   2    0.00    0.00
  -3  11   2    0.02    0.00
  -3  11   2    0.02    0.01
  -3  11   2    0.02    0.00
  -3  11   2    0.02    0.01
  -3  11   2    0.02    0.00
  -3  11   2    0.02    0.01
  -3  11   2    0.02    0.00
  -2  11   2    0.05    0.01
  -2  11   2    0.04    0.01
  -2  11   2    0.05    0.01
  -2  11   2    0.06    0.00
  -2  11   2    0.04    0.01
  -2  11   2    0.05    0.01
  -1  11   2    0.06    0.01
  -1  11   2    0.07    0.01
  -1  11   2    0.06    0.01
  -1  11   2    0.07    0.01
   1  11  -2    0.08    0.01
  -1  11   2    0.06    0.01
  -1  11   2    0.06    0.01
   0  11  -2    0.03    0.01
   0  11   2    0.03    0.00
   0  11   2    0.02    0.01
   0  11   2    0.03    0.00
   0  11   2    0.03    0.01
   0  11   2    0.02    0.01
  -1  11  -2    0.00    0.00
   1  11   2    0.01    0.00
  -1  11  -2    0.00    0.00
  -1  11  -2    0.00    0.01
   1  11   2    0.01    0.00
   1  11   2    0.00    0.00
   1  11   2    0.00    0.01
  -1  11  -2    0.01    0.01
  -2  11  -2    0.03    0.00
  -2  11  -2    0.04    0.01
   2  11   2    0.03    0.00
  -2  11  -2    0.03    0.01
  -2  11  -2    0.03    0.01
   2  11   2    0.03    0.01
  -2  11  -2    0.03    0.01
   2  11   2    0.03    0.01
  -2  11  -2    0.04    0.01
  -3  11  -2    0.01    0.00
  -3  11  -2    0.01    0.00
   3  11   2    0.01    0.00
  -3  11  -2    0.00    0.00
  -3  11  -2    0.00    0.00
  -3  11  -2    0.00    0.01
  -4  11  -2    0.04    0.00
  -4  11  -2    0.05    0.01
 -12   0   3    0.00    0.00
 -12   0   3    0.00    0.00
  12   0  -3    0.00    0.01
 -12   0   3    0.00    0.00
  11   0  -3    0.12    0.01
 -11   0   3    0.12    0.01
 -11   0   3    0.12    0.01
 -11   0   3    0.12    0.01
 -10   0   3    0.00    0.01
 -10   0   3    0.00    0.01
 -10   0   3    0.01    0.01
 -10   0   3    0.00    0.01
  10   0  -3    0.00    0.01
  -9   0   3    0.75    0.02
  -9   0   3    0.75    0.02
   9   0  -3    0.75    0.02
  -9   0   3    0.78    0.03
  -8   0   3   -0.02    0.01
  -8   0   3    0.00    0.01
   8   0  -3    0.01    0.01
   8   0  -3   -0.01    0.01
   8   0  -3    0.01    0.01
   7   0  -3    0.11    0.01
   7   0  -3    0.11    0.01
   7   0  -3    0.10    0.01
   7   0  -3    0.09    0.01
   6   0  -3    0.00    0.01
   6   0  -3    0.00    0.01
   6   0  -3    0.00    0.01
   6   0  -3    0.00    0.01
   5   0  -3    0.48    0.02
   5   0  -3    0.42    0.02
   5   0  -3    0.44    0.02
   5   0  -3    0.42    0.02
   4   0  -3    0.00    0.01
   4   0  -3    0.00    0.01
   4   0  -3   -0.01    0.00
   4   0  -3    0.00    0.01
   3   0  -3   40.65    0.91
   3   0  -3   39.46    0.87
   3   0  -3   37.78    0.83
   3   0  -3   40.60    0.81
   2   0  -3    0.00    0.00
   2   0  -3    0.00    0.00
   2   0  -3    0.00    0.01
   2   0  -3    0.00    0.00
   1   0  -3    5.43    0.11
   1   0  -3    5.47    0.13
   1   0  -3    5.45    0.11
   0   0  -3   -0.04    0.00
   0   0  -3   -0.03    0.00
   0   0  -3   -0.03    0.00
  -1   0  -3    1.19    0.03
   1   0   3    1.20    0.03
  -1   0  -3    1.17    0.03
  -1   0  -3    1.15    0.03
   2   0   3   -0.01    0.01
   2   0   3    0.01    0.01
  -2   0  -3   -0.01    0.01
  -2   0  -3    0.01    0.01
  -2   0  -3   -0.01    0.00
  -3   0  -3   28.42    0.60
   3   0   3   27.91    0.60
   3   0   3   28.19    0.65
  -3   0  -3   28.95    0.66
   3   0   3   29.89    0.59
   3   0   3   28.80    0.58
   3   0   3   27.73    0.62
  -3   0  -3   28.83    0.58
   4   0   3    0.00    0.00
   4   0   3    0.01    0.01
   4   0   3   -0.01    0.01
  -4   0  -3    0.01    0.01
   4   0   3    0.00    0.01
  -4   0  -3    0.00    0.01
   5   0   3    8.89    0.19
  -5   0  -3    8.87    0.21
   5   0   3    8.60    0.20
   6   0   3    0.00    0.01
   6   0   3    0.00    0.01
  -6   0  -3    0.00    0.01
   7   0   3    1.48    0.04
   8   0   3   -0.01    0.01
   8   0   3    0.02    0.01
   9   0   3    0.98    0.03
 -10   0  -3    0.01    0.01
  10   0   3    0.01    0.01
 -11   0  -3    1.15    0.03
 -11   0  -3    1.12    0.03
 -12   0  -3    0.01    0.01
 -12   0  -3    0.01    0.00
 -12   0  -3    0.00    0.00
  12  -1  -3    0.01    0.01
 -12  -1   3    0.02    0.01
 -12  -1   3    0.02    0.00
  12   1  -3    0.02    0.01
 -12   1   3    0.03    0.01
 -11  -1   3    0.01    0.00
 -11  -1   3    0.02    0.01
  11  -1  -3    0.01    0.01
 -11  -1   3    0.01    0.00
 -11   1   3    0.02    0.01
  11   1  -3    0.01    0.01
 -11   1   3    0.01    0.00
 -11   1   3    0.02    0.01
  10  -1  -3    0.01    0.01
 -10  -1   3    0.02    0.01
 -10  -1   3    0.02    0.01
 -10  -1   3    0.03    0.01
  10   1  -3    0.02    0.01
 -10   1   3    0.02    0.01
 -10   1   3    0.02    0.01
 -10   1   3    0.02    0.01
 -10   1   3    0.02    0.01
 -10   1   3    0.02    0.01
  -9  -1   3    0.02    0.01
  -9  -1   3    0.01    0.01
   9  -1  -3    0.01    0.01
  -9  -1   3    0.01    0.01
  -9   1   3    0.02    0.01
   9   1  -3    0.01    0.01
  -9   1   3    0.02    0.01
  -9   1   3    0.02    0.00
  -9   1   3    0.03    0.01
   8  -1  -3    0.01    0.01
  -8  -1   3    0.01    0.01
   8  -1  -3    0.00    0.01
  -8  -1   3    0.02    0.01
   8  -1  -3    0.01    0.01
   8  -1  -3    0.01    0.01
   8   1  -3    0.00    0.01
   8   1  -3    0.00    0.01
  -8   1   3    0.01    0.01
   8   1  -3    0.01    0.01
  -8   1   3    0.00    0.01
   7  -1  -3    0.99    0.03
   7  -1  -3    0.96    0.03
   7  -1  -3    0.95    0.03
   7  -1  -3    0.96    0.03
   7   1  -3    0.94    0.03
   7   1  -3    0.99    0.03
   6  -1  -3    0.71    0.03
   6  -1  -3    0.69    0.02
   6  -1  -3    0.71    0.02
   6  -1  -3    0.72    0.03
   6   1  -3    0.70    0.02
   6   1  -3    0.71    0.03
   6   1  -3    0.74    0.02
   6   1  -3    0.76    0.02
   5  -1  -3    0.19    0.01
   5  -1  -3    0.21    0.02
   5  -1  -3    0.17    0.01
   5  -1  -3    0.18    0.01
   5   1  -3    0.17    0.01
   5   1  -3    0.18    0.01
   5   1  -3    0.20    0.01
   5   1  -3    0.18    0.01
   4  -1  -3    0.07    0.01
   4  -1  -3    0.07    0.01
   4  -1  -3    0.07    0.01
   4  -1  -3    0.07    0.01
   4   1  -3    0.06    0.01
   4   1  -3    0.06    0.01
   4   1  -3    0.06    0.01
   4   1  -3    0.08    0.01
   3  -1  -3   14.05    0.31
   3  -1  -3   12.62    0.28
   3  -1  -3   13.35    0.29
   3  -1  -3   14.75    0.27
   3  -1  -3   13.48    0.28
   3   1  -3   13.11    0.29
   3   1  -3   13.47    0.31
   3   1  -3   12.78    0.27
   3   1  -3   13.01    0.28
   2  -1  -3    0.19    0.01
   2  -1  -3    0.18    0.01
   2  -1  -3    0.20    0.01
   2   1  -3    0.18    0.01
   2   1  -3    0.15    0.01
   2   1  -3    0.18    0.01
   2   1  -3    0.18    0.01
   1   1  -3    2.14    0.05
   1   1  -3    2.06    0.05
   1   1  -3    2.07    0.05
   1   1  -3    2.10    0.04
   0  -1  -3   47.89    1.10
   0  -1   3   48.73    0.99
   0   1  -3   46.77    1.10
   0   1  -3   46.35    1.09
   0   1  -3   47.97    1.01
   0   1  -3   48.56    0.97
   1  -1   3    1.66    0.04
  -1  -1  -3    1.69    0.03
   1  -1   3    1.68    0.04
  -1  -1  -3    1.62    0.04
  -1  -1  -3    1.68    0.04
   1  -1   3    1.63    0.04
  -1   1  -3    1.68    0.04
  -1   1  -3    1.66    0.04
   1   1   3    1.68    0.04
  -1   1  -3    1.65    0.04
   1   1   3    1.62    0.04
  -1   1  -3    1.63    0.04
   2  -1   3    9.36    0.21
   2  -1   3    9.59    0.19
  -2  -1  -3    9.19    0.20
   2  -1   3    9.61    0.20
  -2  -1  -3    9.55    0.22
  -2  -1  -3    9.25    0.19
   2  -1   3    9.59    0.20
  -2   1  -3    9.32    0.20
  -2   1  -3    9.42    0.19
  -2   1  -3    9.69    0.22
   2   1   3    9.70    0.20
   2   1   3    9.36    0.21
   3  -1   3    4.89    0.11
   3  -1   3    5.34    0.11
   3  -1   3    5.00    0.11
  -3  -1  -3    5.22    0.12
  -3  -1  -3    5.12    0.11
   3  -1   3    5.11    0.11
  -3  -1  -3    4.94    0.11
  -3   1  -3    5.42    0.12
   3   1   3    5.11    0.11
  -3   1  -3    4.97    0.11
   3   1   3    5.08    0.12
   3   1   3    5.01    0.11
  -3   1  -3    4.86    0.11
  -4  -1  -3    0.06    0.01
   4  -1   3    0.06    0.01
   4  -1   3    0.05    0.01
  -4  -1  -3    0.06    0.01
   4  -1   3    0.05    0.01
  -4  -1  -3    0.06    0.01
   4  -1   3    0.06    0.01
   4  -1   3    0.06    0.01
   4   1   3    0.06    0.01
   4   1   3    0.06    0.01
  -4   1  -3    0.06    0.01
   4   1   3    0.05    0.01
   5  -1   3    2.83    0.07
   5  -1   3    2.83    0.06
   5  -1   3    2.84    0.06
   5  -1   3    2.76    0.07
   5  -1   3    2.85    0.07
   5   1   3    2.84    0.06
   5   1   3    2.85    0.07
  -5   1  -3    2.81    0.07
   6  -1   3    0.09    0.01
   6  -1   3    0.11    0.01
  -6   1  -3    0.09    0.01
   7  -1   3    0.27    0.02
   7   1   3    0.31    0.02
   8  -1   3    1.39    0.04
   8  -1   3    1.34    0.03
  -8  -1  -3    1.35    0.03
   8   1   3    1.40    0.03
   8   1   3    1.40    0.04
   9  -1   3    0.05    0.01
  -9   1  -3    0.06    0.01
   9   1   3    0.06    0.01
  10  -1   3    1.72    0.04
 -10   1  -3    1.77    0.04
 -10   1  -3    1.78    0.04
  10   1   3    1.68    0.04
  11  -1   3    0.02    0.01
 -11  -1  -3    0.02    0.01
 -11   1  -3    0.02    0.01
 -11   1  -3    0.02    0.01
 -12  -1  -3    0.69    0.02
 -12  -1  -3    0.64    0.02
 -12   1  -3    0.66    0.02
 -12   1  -3    0.68    0.02
 -12   1  -3    0.70    0.02
  12  -2  -3    0.01    0.01
 -12  -2   3    0.01    0.00
 -12  -2   3    0.00    0.00
 -12   2   3    0.00    0.00
 -11  -2   3    0.14    0.01
  11  -2  -3    0.14    0.01
 -11  -2   3    0.14    0.01
 -11  -2   3    0.16    0.01
 -11   2   3    0.16    0.01
 -11   2   3    0.15    0.01
  11   2  -3    0.13    0.01
 -10  -2   3    0.03    0.01
 -10  -2   3    0.07    0.01
  10  -2  -3    0.06    0.01
 -10  -2   3    0.05    0.01
 -10   2   3    0.06    0.01
 -10   2   3    0.04    0.00
  10   2  -3    0.04    0.01
 -10   2   3    0.05    0.01
 -10   2   3    0.06    0.01
  -9  -2   3    0.05    0.01
  -9  -2   3    0.06    0.01
  -9   2   3    0.03    0.01
  -9   2   3    0.04    0.01
  -9   2   3    0.02    0.01
  -9   2   3    0.04    0.01
   9   2  -3    0.03    0.01
  -9   2   3    0.05    0.01
   8  -2  -3    0.73    0.03
   8  -2  -3    0.76    0.03
   8  -2  -3    0.75    0.03
   8  -2  -3    0.73    0.02
  -8  -2   3    0.75    0.03
  -8   2   3    0.72    0.02
  -8   2   3    0.71    0.02
  -8   2   3    0.72    0.03
   8   2  -3    0.73    0.02
  -8   2   3    0.67    0.02
  -8   2   3    0.74    0.02
   8   2  -3    0.77    0.03
  -8   2   3    0.74    0.01
   8   2  -3    0.76    0.03
   7  -2  -3    0.53    0.02
   7  -2  -3    0.53    0.02
   7  -2  -3    0.52    0.02
   7  -2  -3    0.54    0.02
   7   2  -3    0.54    0.02
   7   2  -3    0.52    0.02
   6  -2  -3    4.95    0.11
   6  -2  -3    4.86    0.12
   6  -2  -3    4.87    0.12
   6  -2  -3    4.95    0.11
   6   2  -3    4.91    0.12
   6   2  -3    5.07    0.11
   5  -2  -3    2.92    0.06
   5  -2  -3    2.79    0.07
   5  -2  -3    2.80    0.07
   5  -2  -3    2.89    0.07
   5   2  -3    2.77    0.07
   5   2  -3    2.68    0.06
   5   2  -3    2.88    0.07
   4  -2  -3    0.78    0.02
   4  -2  -3    0.80    0.02
   4  -2  -3    0.84    0.03
   4  -2  -3    0.80    0.02
   4   2  -3    0.75    0.02
   4   2  -3    0.77    0.02
   4   2  -3    0.82    0.03
   4   2  -3    0.81    0.02
   3  -2  -3    0.01    0.00
  -3  -2   3    0.01    0.00
   3  -2  -3    0.00    0.01
   3  -2  -3    0.01    0.00
   3  -2  -3    0.00    0.00
   3   2  -3    0.00    0.01
   3   2  -3    0.01    0.00
   3   2  -3    0.00    0.01
   3   2  -3    0.01    0.01
   3   2  -3    0.01    0.01
  -2  -2   3   10.99    0.24
   2  -2  -3   11.40    0.23
  -2  -2   3   11.14    0.23
   2  -2  -3   11.48    0.24
  -2  -2   3   11.51    0.23
   2  -2  -3   11.13    0.24
   2   2  -3   11.06    0.26
   2   2  -3   11.48    0.25
   2   2  -3   11.20    0.24
   2   2  -3   11.40    0.23
   2   2  -3   11.20    0.26
  -1  -2   3    2.87    0.06
  -1  -2   3    2.88    0.06
  -1  -2   3    2.91    0.06
   1   2  -3    2.76    0.06
   1   2  -3    2.85    0.06
   1   2  -3    2.86    0.07
   1   2  -3    2.97    0.07
   0  -2   3   14.97    0.30
   0  -2   3   14.47    0.29
   0  -2   3   14.21    0.30
   0   2  -3   13.84    0.29
   0   2  -3   14.37    0.33
   0   2  -3   14.89    0.33
   1  -2   3    0.34    0.01
  -1  -2  -3    0.36    0.01
   1  -2   3    0.34    0.01
  -1  -2  -3    0.37    0.01
   1  -2   3    0.36    0.01
  -1   2  -3    0.35    0.01
  -1   2  -3    0.37    0.01
   1   2   3    0.34    0.01
   1   2   3    0.33    0.01
   2  -2   3   10.48    0.22
  -2  -2  -3   11.13    0.22
   2  -2   3   10.42    0.23
  -2  -2  -3   10.64    0.22
   2  -2   3   10.28    0.22
   2  -2   3   11.02    0.22
  -2   2  -3   10.47    0.25
   2   2   3   10.64    0.24
   2   2   3   10.23    0.23
   3  -2   3    5.07    0.11
  -3  -2  -3    5.11    0.11
   3  -2   3    5.09    0.12
   3  -2   3    5.03    0.11
   3  -2   3    5.30    0.11
  -3  -2  -3    5.02    0.11
   3   2   3    5.26    0.12
  -3   2  -3    5.26    0.12
   3   2   3    5.06    0.12
   4  -2   3    3.78    0.08
  -4  -2  -3    3.82    0.08
   4  -2   3    3.79    0.09
   4  -2   3    3.72    0.09
   4  -2   3    3.87    0.08
  -4  -2  -3    3.80    0.09
   4   2   3    3.87    0.09
  -4   2  -3    3.90    0.09
   5  -2   3    1.35    0.03
  -5  -2  -3    1.34    0.03
   5  -2   3    1.35    0.04
   5  -2   3    1.30    0.04
   5  -2   3    1.32    0.03
   5  -2   3    1.35    0.04
   5   2   3    1.34    0.04
  -5   2  -3    1.35    0.04
   6  -2   3   27.07    0.60
   6  -2   3   27.20    0.55
   6  -2   3   27.74    0.56
   6   2   3   26.84    0.59
  -6   2  -3   26.62    0.63
   7  -2   3    0.98    0.03
   7   2   3    0.95    0.03
  -8  -2  -3    4.05    0.08
   8  -2   3    3.87    0.10
   8  -2   3    3.96    0.08
   8   2   3    3.86    0.08
  -8   2  -3    3.90    0.08
   8   2   3    3.91    0.10
  -8   2  -3    3.94    0.08
   9  -2   3    2.07    0.05
  -9  -2  -3    2.03    0.04
  -9   2  -3    2.21    0.05
  -9   2  -3    2.06    0.05
  10  -2   3    1.98    0.04
 -10   2  -3    2.05    0.05
 -10   2  -3    2.02    0.04
  11  -2   3    0.96    0.02
 -11  -2  -3    0.88    0.03
 -11   2  -3    0.92    0.02
 -11   2  -3    0.92    0.02
 -11   2  -3    0.93    0.02
 -12  -2  -3    0.39    0.01
 -12  -2  -3    0.42    0.01
 -12   2  -3    0.40    0.01
 -12   2  -3    0.40    0.01
  12   2   3    0.38    0.01
 -12   2  -3    0.41    0.01
 -12  -3   3    0.00    0.00
  12  -3  -3    0.01    0.01
 -12  -3   3    0.00    0.00
 -12   3   3    0.01    0.00
 -12   3   3    0.01    0.00
 -11  -3   3    0.02    0.01
 -11  -3   3    0.00    0.01
  11  -3  -3    0.01    0.01
 -11  -3   3    0.01    0.01
 -11   3   3    0.02    0.01
 -11   3   3    0.01    0.01
 -10  -3   3    0.05    0.01
 -10  -3   3    0.03    0.01
 -10   3   3    0.03    0.01
 -10   3   3    0.04    0.01
 -10   3   3    0.05    0.01
  10   3  -3    0.03    0.01
  -9  -3   3    0.02    0.01
  -9   3   3    0.03    0.00
  -9   3   3    0.03    0.00
  -9   3   3    0.03    0.01
  -9   3   3    0.01    0.01
  -9   3   3    0.03    0.01
  -9   3   3    0.04    0.01
   9   3  -3    0.04    0.01
  -8  -3   3    0.01    0.01
  -8   3   3    0.01    0.01
  -8   3   3    0.00    0.01
   8   3  -3    0.01    0.01
  -8   3   3    0.00    0.00
  -8   3   3    0.01    0.01
   8   3  -3    0.02    0.01
  -8   3   3    0.01    0.01
   8   3  -3    0.00    0.01
  -8   3   3    0.01    0.01
  -7  -3   3    0.09    0.01
   7  -3  -3    0.06    0.01
   7  -3  -3    0.09    0.01
   7  -3  -3    0.08    0.01
   7  -3  -3    0.07    0.01
  -7   3   3    0.08    0.01
   7   3  -3    0.08    0.01
   7   3  -3    0.07    0.01
   7   3  -3    0.07    0.01
   6  -3  -3    1.21    0.04
   6  -3  -3    1.24    0.03
   6  -3  -3    1.17    0.04
   6  -3  -3    1.17    0.03
   6   3  -3    1.22    0.04
   6   3  -3    1.24    0.03
   5  -3  -3    2.18    0.05
   5  -3  -3    2.20    0.06
   5  -3  -3    2.26    0.05
   5  -3  -3    2.17    0.06
   5   3  -3    2.18    0.06
   5   3  -3    2.31    0.05
   4  -3  -3    0.02    0.00
   4  -3  -3    0.02    0.01
   4  -3  -3    0.02    0.01
   4  -3  -3    0.01    0.00
   4   3  -3    0.01    0.01
   4   3  -3    0.03    0.01
   3  -3  -3    0.06    0.01
   3  -3  -3    0.05    0.01
  -3  -3   3    0.05    0.01
   3  -3  -3    0.05    0.01
  -3  -3   3    0.05    0.01
  -3  -3   3    0.06    0.01
   3  -3  -3    0.05    0.00
   3   3  -3    0.04    0.01
   3   3  -3    0.05    0.01
   2  -3  -3    9.16    0.21
   2  -3  -3    9.69    0.21
  -2  -3   3   10.19    0.20
  -2  -3   3    9.98    0.21
   2  -3  -3   10.19    0.21
  -2  -3   3    9.99    0.21
   2   3  -3    9.39    0.23
   2   3  -3   10.25    0.23
   2   3  -3    9.82    0.22
  -1  -3   3    1.76    0.04
   1  -3  -3    1.70    0.04
   1  -3  -3    1.76    0.04
  -1  -3   3    1.74    0.04
  -1  -3   3    1.77    0.04
   1   3  -3    1.75    0.05
   1   3  -3    1.71    0.04
   0  -3  -3    0.11    0.01
   0  -3   3    0.12    0.01
   0  -3   3    0.11    0.01
   0  -3  -3    0.12    0.01
   0  -3   3    0.11    0.01
   0   3  -3    0.13    0.01
   0   3  -3    0.13    0.01
  -1  -3  -3    9.03    0.19
   1  -3   3    8.79    0.18
  -1  -3  -3    8.81    0.18
   1  -3   3    9.03    0.19
   1  -3   3    8.76    0.19
  -1   3  -3    8.96    0.20
  -1   3  -3    8.69    0.21
   1   3   3    8.76    0.20
   2  -3   3    7.68    0.16
   2  -3   3    7.77    0.16
  -2  -3  -3    7.61    0.16
   2  -3   3    7.54    0.17
   2  -3   3    7.47    0.16
  -2  -3  -3    7.74    0.16
   2   3   3    7.86    0.17
   2   3   3    7.48    0.18
  -2   3  -3    7.49    0.18
   3  -3   3    2.40    0.06
   3  -3   3    2.41    0.05
   3  -3   3    2.46    0.06
   3  -3   3    2.53    0.06
  -3  -3  -3    2.43    0.06
  -3  -3  -3    2.49    0.05
   3   3   3    2.47    0.06
   3   3   3    2.41    0.06
  -3   3  -3    2.44    0.06
  -4  -3  -3    3.65    0.08
   4  -3   3    3.71    0.08
   4  -3   3    3.75    0.08
   4  -3   3    3.70    0.09
   4  -3   3    3.75    0.08
  -4  -3  -3    3.63    0.08
   4   3   3    3.50    0.09
  -4   3  -3    3.71    0.09
   5  -3   3    3.51    0.08
   5  -3   3    3.52    0.08
   5  -3   3    3.47    0.08
  -5  -3  -3    3.50    0.08
  -5  -3  -3    3.49    0.08
   5  -3   3    3.43    0.08
  -5   3  -3    3.51    0.09
   5   3   3    3.37    0.08
   6  -3   3    3.93    0.09
   6  -3   3    3.78    0.09
   6  -3   3    3.82    0.09
   6  -3   3    3.81    0.10
   6  -3   3    3.90    0.09
  -6   3  -3    3.85    0.10
   6   3   3    3.75    0.09
   7  -3   3    3.67    0.09
  -7  -3  -3    3.54    0.07
   7  -3   3    3.58    0.07
   7   3   3    3.58    0.09
  -7   3  -3    3.66    0.07
   8  -3   3    1.49    0.04
  -8  -3  -3    1.38    0.03
  -8   3  -3    1.36    0.03
  -8   3  -3    1.41    0.03
  -9  -3  -3   17.01    0.31
   9  -3   3   17.00    0.31
  -9   3  -3   17.01    0.31
  -9   3  -3   17.45    0.32
  -9   3  -3   17.02    0.31
  10  -3   3    0.00    0.01
 -10   3  -3    0.00    0.01
 -10   3  -3    0.00    0.00
 -10   3  -3    0.00    0.01
  11  -3   3    1.92    0.04
  11   3   3    1.79    0.04
 -11   3  -3    1.97    0.04
 -11   3  -3    1.81    0.04
 -11   3  -3    1.94    0.04
 -12   3  -3    4.40    0.08
 -12   4   3    0.05    0.01
  11  -4  -3    0.44    0.02
 -11  -4   3    0.46    0.02
 -11   4   3    0.45    0.02
 -11   4   3    0.42    0.01
 -10  -4   3    0.25    0.02
 -10   4   3    0.28    0.01
 -10   4   3    0.29    0.01
 -10   4   3    0.31    0.01
  -9  -4   3    0.27    0.02
  -9   4   3    0.28    0.02
  -9   4   3    0.29    0.02
  -9   4   3    0.27    0.02
  -9   4   3    0.27    0.02
  -9   4   3    0.28    0.02
  -8  -4   3    0.14    0.01
  -8   4   3    0.13    0.01
   8   4  -3    0.13    0.01
  -8   4   3    0.12    0.01
  -8   4   3    0.14    0.01
  -8   4   3    0.12    0.01
  -8   4   3    0.16    0.01
  -8   4   3    0.14    0.01
  -7  -4   3    0.92    0.03
   7  -4  -3    0.92    0.03
   7  -4  -3    0.90    0.04
   7  -4  -3    0.91    0.03
   7  -4  -3    0.93    0.03
  -7   4   3    0.92    0.03
   7   4  -3    0.94    0.03
  -7   4   3    0.88    0.03
   7   4  -3    0.91    0.02
  -7   4   3    0.92    0.03
   7   4  -3    0.90    0.03
  -7   4   3    0.93    0.03
  -7   4   3    0.88    0.03
  -7   4   3    0.98    0.03
   6  -4  -3    1.34    0.04
   6  -4  -3    1.34    0.04
   6  -4  -3    1.33    0.04
   6  -4  -3    1.34    0.03
   6   4  -3    1.38    0.04
   6   4  -3    1.38    0.04
   5  -4  -3    0.00    0.01
   5  -4  -3    0.01    0.01
   5  -4  -3    0.01    0.01
   5   4  -3    0.00    0.01
   5   4  -3    0.00    0.01
   4  -4  -3    1.38    0.03
   4  -4  -3    1.28    0.03
   4  -4  -3    1.36    0.04
   4  -4  -3    1.36    0.03
   4   4  -3    1.38    0.04
   4   4  -3    1.31    0.04
  -3  -4   3    0.39    0.01
   3  -4  -3    0.42    0.02
  -3  -4   3    0.38    0.02
   3  -4  -3    0.41    0.01
   3  -4  -3    0.49    0.01
  -3  -4   3    0.43    0.02
   3  -4  -3    0.41    0.02
   3   4  -3    0.39    0.02
   3   4  -3    0.42    0.02
  -2  -4   3    5.78    0.12
  -2  -4   3    5.74    0.12
  -2  -4   3    5.84    0.13
   2  -4  -3    5.70    0.12
   2  -4  -3    5.92    0.12
   2   4  -3    5.67    0.14
  -1  -4   3    7.38    0.16
  -1  -4   3    7.34    0.16
   1  -4  -3    7.42    0.16
  -1  -4   3    7.20    0.15
   1   4  -3    7.45    0.17
   0  -4   3    0.01    0.01
   0  -4   3    0.03    0.01
   0  -4  -3    0.00    0.00
   0  -4   3    0.01    0.01
   0  -4  -3    0.00    0.00
   0   4  -3    0.00    0.01
   0   4  -3    0.00    0.01
   1  -4   3    4.65    0.10
   1  -4   3    4.63    0.10
  -1  -4  -3    4.63    0.10
  -1  -4  -3    4.65    0.10
   1  -4   3    4.74    0.10
  -1   4  -3    4.53    0.11
  -1   4  -3    4.69    0.11
   2  -4   3    4.79    0.11
   2  -4   3    4.85    0.11
   2  -4   3    4.86    0.10
   2  -4   3    4.82    0.11
  -2  -4  -3    4.82    0.11
  -2  -4  -3    4.99    0.10
   2   4   3    5.03    0.12
  -2   4  -3    4.85    0.12
   3  -4   3    4.23    0.09
   3  -4   3    4.33    0.10
  -3  -4  -3    4.26    0.09
   3  -4   3    4.44    0.10
  -3  -4  -3    4.27    0.10
   3  -4   3    4.30    0.10
  -3   4  -3    4.30    0.11
   3   4   3    4.33    0.10
   3   4   3    4.23    0.10
   4  -4   3    0.00    0.01
   4  -4   3    0.00    0.01
  -4  -4  -3    0.02    0.01
   4  -4   3    0.01    0.01
  -4  -4  -3    0.00    0.01
   4  -4   3    0.01    0.01
  -4   4  -3    0.00    0.01
   4   4   3    0.01    0.01
   5  -4   3   16.24    0.35
   5  -4   3   16.56    0.35
   5  -4   3   16.61    0.37
  -5  -4  -3   16.87    0.34
  -5  -4  -3   16.65    0.35
   5  -4   3   16.31    0.34
  -5   4  -3   16.57    0.39
   5   4   3   16.27    0.37
   6  -4   3    0.06    0.01
   6  -4   3    0.10    0.01
   6  -4   3    0.06    0.01
   6  -4   3    0.07    0.01
  -6   4  -3    0.09    0.01
   6   4   3    0.05    0.01
   7  -4   3    0.43    0.02
  -7   4  -3    0.45    0.01
  -7   4  -3    0.43    0.02
  -7   4  -3    0.46    0.01
  -7   4  -3    0.43    0.02
   7   4   3    0.45    0.02
   7   4   3    0.45    0.02
   7   4   3    0.49    0.02
  -8  -4  -3    0.45    0.02
   8  -4   3    0.45    0.02
  -8   4  -3    0.46    0.01
  -8   4  -3    0.44    0.02
   8   4   3    0.47    0.02
  -8   4  -3    0.47    0.02
  -8   4  -3    0.46    0.02
  -9  -4  -3    0.30    0.01
   9  -4   3    0.32    0.02
  -9   4  -3    0.30    0.01
  -9   4  -3    0.30    0.01
  -9   4  -3    0.30    0.02
   9   4   3    0.30    0.02
  10  -4   3    0.12    0.01
  10   4   3    0.13    0.01
 -10   4  -3    0.14    0.01
 -10   4  -3    0.13    0.01
 -10   4  -3    0.12    0.01
 -11   4  -3    0.13    0.01
  11   4   3    0.14    0.01
 -11   4  -3    0.15    0.01
  11  -5  -3    0.01    0.01
 -11  -5   3    0.01    0.01
 -11   5   3    0.01    0.01
 -11   5   3    0.02    0.01
  11   5  -3    0.01    0.01
 -10   5   3    0.13    0.01
 -10   5   3    0.14    0.01
 -10   5   3    0.12    0.01
 -10   5   3    0.12    0.01
  -9  -5   3    0.33    0.02
  -9   5   3    0.33    0.02
  -9   5   3    0.33    0.02
  -9   5   3    0.37    0.02
  -9   5   3    0.36    0.02
  -8  -5   3    0.68    0.02
  -8  -5   3    0.69    0.03
  -8   5   3    0.69    0.02
  -8   5   3    0.69    0.03
  -8   5   3    0.72    0.02
  -8   5   3    0.67    0.02
  -8   5   3    0.69    0.02
  -7  -5   3    0.33    0.02
  -7   5   3    0.34    0.02
  -7   5   3    0.33    0.02
  -7   5   3    0.35    0.02
  -7   5   3    0.32    0.02
  -7   5   3    0.30    0.02
  -7   5   3    0.32    0.02
  -6  -5   3    0.39    0.02
   6  -5  -3    0.39    0.02
   6  -5  -3    0.40    0.02
   6  -5  -3    0.40    0.02
   6  -5  -3    0.40    0.02
  -6   5   3    0.38    0.02
  -6   5   3    0.40    0.02
   6   5  -3    0.40    0.02
  -6   5   3    0.36    0.02
  -6   5   3    0.42    0.01
  -6   5   3    0.38    0.02
   6   5  -3    0.42    0.02
  -6   5   3    0.37    0.02
  -6   5   3    0.41    0.02
   6   5  -3    0.36    0.02
   5  -5  -3    1.82    0.04
   5  -5  -3    1.81    0.05
   5  -5  -3    1.87    0.05
   5   5  -3    1.82    0.05
   4  -5  -3    0.96    0.02
   4  -5  -3    0.88    0.03
   4  -5  -3    0.94    0.03
   4  -5  -3    0.93    0.03
   4   5  -3    0.93    0.03
   3  -5  -3    2.26    0.05
   3  -5  -3    2.33    0.05
   3  -5  -3    2.18    0.05
   3  -5  -3    2.12    0.06
  -3  -5   3    2.24    0.05
  -3  -5   3    2.31    0.05
   3   5  -3    2.31    0.06
  -2  -5   3    0.50    0.02
  -2  -5   3    0.49    0.02
   2  -5  -3    0.52    0.01
   2  -5  -3    0.51    0.02
  -2  -5   3    0.49    0.02
   2  -5  -3    0.51    0.01
   2   5  -3    0.50    0.02
   1  -5  -3    0.24    0.01
  -1  -5   3    0.23    0.01
  -1  -5   3    0.24    0.01
   1  -5  -3    0.25    0.01
  -1  -5   3    0.24    0.01
   1  -5  -3    0.24    0.01
   1   5  -3    0.25    0.02
   0  -5   3    8.43    0.18
   0  -5  -3    8.43    0.18
   0  -5   3    8.38    0.18
   0  -5  -3    8.55    0.17
   0  -5   3    8.48    0.18
   0   5  -3    8.58    0.20
  -1  -5  -3   25.46    0.51
  -1  -5  -3   24.89    0.53
   1  -5   3   24.91    0.53
   1  -5   3   25.37    0.52
   1  -5   3   24.64    0.51
  -2  -5  -3    3.89    0.08
   2  -5   3    3.88    0.09
   2  -5   3    3.81    0.09
  -2  -5  -3    3.82    0.09
   2  -5   3    3.92    0.09
   2  -5   3    3.84    0.08
   2   5   3    3.96    0.09
  -2   5  -3    3.88    0.10
   3  -5   3    0.07    0.01
   3  -5   3    0.06    0.01
  -3  -5  -3    0.06    0.01
   3  -5   3    0.07    0.01
  -3  -5  -3    0.06    0.01
   3  -5   3    0.07    0.01
  -3   5  -3    0.07    0.01
  -4  -5  -3    2.56    0.06
   4  -5   3    2.52    0.06
  -4  -5  -3    2.50    0.06
   4  -5   3    2.58    0.07
   4  -5   3    2.45    0.06
   4  -5   3    2.53    0.06
  -4   5  -3    2.58    0.07
   5  -5   3    0.03    0.01
  -5  -5  -3    0.04    0.01
   5  -5   3    0.04    0.01
  -5  -5  -3    0.04    0.01
   5  -5   3    0.04    0.01
   5  -5   3    0.04    0.01
   5   5   3    0.04    0.01
  -5   5  -3    0.03    0.01
  -5   5  -3    0.05    0.01
   6  -5   3    0.48    0.02
   6  -5   3    0.48    0.02
   6  -5   3    0.53    0.02
   6  -5   3    0.48    0.02
  -6   5  -3    0.46    0.02
   6   5   3    0.47    0.02
  -6   5  -3    0.47    0.01
   6   5   3    0.50    0.02
  -6   5  -3    0.53    0.02
   6   5   3    0.49    0.02
  -6   5  -3    0.49    0.01
   6   5   3    0.51    0.02
  -6   5  -3    0.50    0.02
  -7   5  -3    1.68    0.03
  -7   5  -3    1.72    0.04
  -7   5  -3    1.77    0.04
   7   5   3    1.64    0.04
  -7   5  -3    1.66    0.04
   7   5   3    1.67    0.04
  -8  -5  -3    0.01    0.01
   8  -5   3    0.00    0.01
  -8   5  -3    0.02    0.01
  -8   5  -3    0.01    0.00
  -8   5  -3    0.00    0.01
  -8   5  -3   -0.01    0.01
   8   5   3    0.01    0.01
  -9  -5  -3    0.23    0.01
   9  -5   3    0.25    0.02
  -9   5  -3    0.22    0.01
  -9   5  -3    0.23    0.01
   9   5   3    0.20    0.01
 -10   5  -3    0.03    0.01
  10   5   3    0.02    0.01
 -10   5  -3    0.03    0.01
 -11   5  -3    0.21    0.01
  11   5   3    0.18    0.01
  10   6  -3    0.53    0.02
 -10   6   3    0.58    0.02
 -10   6   3    0.53    0.02
 -10   6   3    0.54    0.02
  -9   6   3    0.01    0.01
  -9   6   3    0.01    0.01
  -9   6   3    0.02    0.01
  -9   6   3    0.00    0.01
   9   6  -3    0.00    0.01
  -9   6   3    0.01    0.01
  -8  -6   3    0.10    0.01
  -8   6   3    0.09    0.01
  -8   6   3    0.11    0.01
  -8   6   3    0.12    0.01
  -8   6   3    0.08    0.01
   8   6  -3    0.09    0.01
  -8   6   3    0.09    0.01
  -7  -6   3    0.65    0.03
  -7   6   3    0.67    0.02
  -7   6   3    0.72    0.02
  -7   6   3    0.71    0.02
  -7   6   3    0.71    0.03
   7   6  -3    0.69    0.02
  -7   6   3    0.72    0.02
  -7   6   3    0.69    0.02
  -6  -6   3    0.05    0.01
  -6   6   3    0.06    0.01
   6   6  -3    0.04    0.01
   6   6  -3    0.07    0.01
  -6   6   3    0.04    0.01
  -6   6   3    0.07    0.01
  -6   6   3    0.05    0.01
  -6   6   3    0.07    0.01
  -6   6   3    0.06    0.01
   5  -6  -3    0.34    0.01
   5  -6  -3    0.35    0.02
  -5  -6   3    0.34    0.02
   5  -6  -3    0.34    0.02
  -5   6   3    0.35    0.02
  -5   6   3    0.34    0.02
  -5   6   3    0.38    0.02
  -5   6   3    0.35    0.01
  -5   6   3    0.36    0.02
  -5   6   3    0.34    0.02
   5   6  -3    0.34    0.02
  -5   6   3    0.36    0.02
   5   6  -3    0.34    0.02
   5   6  -3    0.35    0.02
   4  -6  -3    0.56    0.02
   4  -6  -3    0.57    0.02
   4  -6  -3    0.59    0.03
   4  -6  -3    0.57    0.02
   4   6  -3    0.57    0.03
   3  -6  -3    0.30    0.01
   3  -6  -3    0.31    0.02
   3  -6  -3    0.33    0.02
   3  -6  -3    0.32    0.01
   3   6  -3    0.30    0.02
   2  -6  -3    0.20    0.01
  -2  -6   3    0.20    0.01
   2  -6  -3    0.18    0.01
  -2  -6   3    0.21    0.01
   2  -6  -3    0.19    0.01
  -2  -6   3    0.20    0.01
   2   6  -3    0.19    0.02
   1  -6  -3    1.06    0.03
  -1  -6   3    1.08    0.03
   1  -6  -3    1.04    0.03
  -1  -6   3    1.06    0.03
   1  -6  -3    1.04    0.03
  -1  -6   3    1.07    0.03
   1   6  -3    1.03    0.03
   0  -6  -3    0.02    0.00
   0  -6   3    0.02    0.01
   0  -6  -3    0.03    0.01
   0  -6  -3    0.03    0.01
   0  -6   3    0.03    0.01
   0  -6   3    0.02    0.01
   1  -6   3    1.00    0.03
  -1  -6  -3    0.97    0.03
   1  -6   3    0.98    0.03
  -1  -6  -3    1.01    0.03
   1  -6   3    1.00    0.03
   2  -6   3    3.02    0.07
   2  -6   3    3.09    0.08
  -2  -6  -3    3.04    0.07
   2  -6   3    3.03    0.07
   2  -6   3    3.11    0.07
  -2  -6  -3    2.98    0.07
   3  -6   3   -0.01    0.01
  -3  -6  -3   -0.01    0.01
  -3  -6  -3   -0.01    0.00
   3  -6   3    0.01    0.01
   3  -6   3    0.00    0.01
   3  -6   3    0.01    0.01
   4  -6   3    1.74    0.05
  -4  -6  -3    1.75    0.05
   4  -6   3    1.68    0.05
   4  -6   3    1.64    0.04
  -4  -6  -3    1.71    0.04
   4  -6   3    1.70    0.05
  -4   6  -3    1.72    0.05
   4   6   3    1.66    0.04
  -4   6  -3    1.60    0.04
   4   6   3    1.68    0.03
  -4   6  -3    1.70    0.03
   5  -6   3    0.24    0.01
   5  -6   3    0.28    0.02
   5  -6   3    0.26    0.02
  -5  -6  -3    0.26    0.01
   5  -6   3    0.26    0.02
  -5   6  -3    0.26    0.01
  -5   6  -3    0.26    0.02
  -5   6  -3    0.26    0.01
  -5   6  -3    0.24    0.02
   5   6   3    0.25    0.02
   5   6   3    0.25    0.01
  -5   6  -3    0.25    0.01
   5   6   3    0.27    0.01
   5   6   3    0.25    0.02
  -5   6  -3    0.26    0.02
  -5   6  -3    0.25    0.02
  -6   6  -3    2.22    0.05
  -6   6  -3    2.13    0.05
  -6   6  -3    2.11    0.05
   6   6   3    2.21    0.05
   6   6   3    2.21    0.04
   6   6   3    2.12    0.05
   6   6   3    2.20    0.05
  -6   6  -3    2.19    0.04
  -6   6  -3    2.17    0.05
  -6   6  -3    2.27    0.06
  -7   6  -3    3.11    0.07
   7   6   3    3.07    0.07
  -7   6  -3    3.15    0.07
  -7   6  -3    3.16    0.06
   7   6   3    3.07    0.07
  -7   6  -3    3.03    0.07
  -7   6  -3    3.13    0.07
   7   6   3    3.17    0.06
   7   6   3    3.13    0.06
  -7   6  -3    3.07    0.07
  -8  -6  -3    0.15    0.01
  -8   6  -3    0.18    0.01
   8   6   3    0.14    0.01
   8   6   3    0.15    0.01
  -8   6  -3    0.16    0.02
  -8   6  -3    0.18    0.01
  -8   6  -3    0.17    0.01
  -9  -6  -3    0.90    0.02
  -9   6  -3    1.00    0.03
   9   6   3    0.94    0.02
   9   6   3    0.93    0.02
  -9   6  -3    0.93    0.02
  -9   6  -3    0.91    0.02
  10   6   3    0.08    0.01
 -10   6  -3    0.08    0.01
 -10   6  -3    0.09    0.01
 -10   7   3    0.01    0.00
 -10   7   3    0.00    0.00
 -10   7   3    0.00    0.01
  -9   7   3    0.01    0.01
   9   7  -3    0.02    0.00
  -9   7   3    0.01    0.00
  -9   7   3    0.01    0.01
  -9   7   3    0.00    0.01
  -9   7   3    0.01    0.01
  -8  -7   3    0.15    0.01
  -8   7   3    0.13    0.01
  -8   7   3    0.13    0.01
   8   7  -3    0.14    0.01
  -8   7   3    0.15    0.01
  -8   7   3    0.16    0.01
  -8   7   3    0.15    0.01
  -8   7   3    0.15    0.01
   7   7  -3    0.03    0.01
  -7   7   3    0.02    0.01
  -7   7   3    0.01    0.01
  -7   7   3    0.02    0.01
  -7   7   3    0.02    0.01
  -7   7   3    0.02    0.01
  -7   7   3    0.00    0.01
  -6  -7   3    0.01    0.01
  -6   7   3    0.03    0.01
  -6   7   3    0.01    0.01
  -6   7   3    0.02    0.01
  -6   7   3    0.02    0.01
  -6   7   3    0.02    0.01
  -6   7   3    0.01    0.01
   6   7  -3    0.01    0.01
   6   7  -3    0.02    0.01
  -6   7   3    0.00    0.01
  -5  -7   3    0.20    0.01
  -5   7   3    0.18    0.01
  -5   7   3    0.20    0.01
  -5   7   3    0.19    0.01
   5   7  -3    0.19    0.01
  -5   7   3    0.18    0.02
  -5   7   3    0.17    0.01
  -5   7   3    0.20    0.02
  -5   7   3    0.18    0.01
   5   7  -3    0.18    0.01
  -4  -7   3    0.00    0.01
  -4   7   3    0.00    0.01
  -4   7   3    0.01    0.01
  -4   7   3    0.00    0.01
  -4   7   3    0.01    0.01
   4   7  -3    0.02    0.01
  -4   7   3    0.00    0.01
   4   7  -3    0.00    0.01
  -4   7   3    0.00    0.01
  -4   7   3    0.00    0.01
  -4   7   3    0.00    0.01
   4   7  -3    0.01    0.01
   3  -7  -3   -0.01    0.01
   3  -7  -3    0.01    0.00
  -3  -7   3    0.00    0.01
   3  -7  -3    0.00    0.01
   3  -7  -3    0.01    0.01
  -3   7   3   -0.01    0.01
   3   7  -3    0.00    0.01
  -3   7   3    0.00    0.01
   3   7  -3    0.02    0.01
   3   7  -3    0.01    0.01
  -3   7   3    0.01    0.01
  -3   7   3    0.00    0.01
  -3   7   3    0.00    0.01
  -3   7   3    0.00    0.01
  -3   7   3    0.00    0.01
  -3   7   3   -0.01    0.01
   3   7  -3    0.00    0.01
   2  -7  -3    0.01    0.01
   2  -7  -3    0.01    0.01
  -2  -7   3    0.00    0.01
  -2  -7   3    0.01    0.01
  -2  -7   3    0.01    0.01
   2  -7  -3    0.01    0.00
   2   7  -3    0.01    0.01
  -2   7   3    0.00    0.01
  -2   7   3    0.04    0.01
  -2   7   3    0.00    0.01
  -2   7   3    0.00    0.01
   2   7  -3    0.01    0.01
  -2   7   3    0.01    0.01
   2   7  -3   -0.01    0.01
  -2   7   3    0.00    0.01
   2   7  -3    0.00    0.01
  -2   7   3   -0.01    0.01
   1  -7  -3    0.35    0.01
   1  -7  -3    0.34    0.01
  -1  -7   3    0.33    0.02
   1  -7  -3    0.35    0.02
  -1  -7   3    0.34    0.02
  -1  -7   3    0.36    0.02
   1   7  -3    0.34    0.01
   1   7  -3    0.35    0.02
   0  -7   3    0.65    0.02
   0  -7   3    0.69    0.02
   0  -7  -3    0.69    0.02
   0  -7  -3    0.70    0.03
   0  -7  -3    0.69    0.02
   0  -7   3    0.66    0.02
   0   7  -3    0.67    0.02
   0   7  -3    0.66    0.02
   1  -7   3    2.38    0.06
   1  -7   3    2.46    0.06
  -1  -7  -3    2.46    0.06
   1  -7   3    2.49    0.06
  -1  -7  -3    2.40    0.06
  -1  -7  -3    2.41    0.06
   1   7   3    2.45    0.06
  -1   7  -3    2.43    0.05
  -1   7  -3    2.37    0.05
   2  -7   3    0.01    0.01
  -2  -7  -3    0.01    0.01
   2  -7   3    0.00    0.01
   2  -7   3    0.00    0.01
  -2  -7  -3    0.01    0.01
  -2  -7  -3    0.01    0.01
   2  -7   3    0.01    0.01
  -2   7  -3    0.00    0.01
   2   7   3    0.00    0.01
  -2   7  -3    0.00    0.01
   2   7   3   -0.01    0.01
   2   7   3    0.02    0.01
  -2   7  -3    0.00    0.01
  -2   7  -3    0.01    0.00
   2   7   3   -0.01    0.01
   2   7   3    0.00    0.01
  -2   7  -3    0.00    0.01
   3  -7   3    0.02    0.01
   3  -7   3    0.01    0.01
  -3  -7  -3    0.01    0.01
   3  -7   3    0.00    0.01
  -3  -7  -3    0.02    0.01
   3  -7   3    0.01    0.01
  -3  -7  -3    0.02    0.01
  -3   7  -3    0.03    0.01
  -3   7  -3    0.01    0.01
  -3   7  -3    0.00    0.01
  -3   7  -3    0.01    0.01
   3   7   3    0.01    0.00
  -3   7  -3    0.01    0.00
   3   7   3    0.01    0.01
   3   7   3    0.00    0.01
  -3   7  -3    0.01    0.01
   3   7   3    0.01    0.01
   3   7   3    0.00    0.01
  -3   7  -3    0.01    0.01
  -4   7  -3    0.22    0.02
   4   7   3    0.22    0.01
  -4   7  -3    0.22    0.01
   4   7   3    0.23    0.02
   4   7   3    0.21    0.02
  -4   7  -3    0.20    0.02
   4   7   3    0.25    0.01
  -4   7  -3    0.22    0.02
  -4   7  -3    0.24    0.01
   4   7   3    0.22    0.02
  -4   7  -3    0.23    0.01
  -4   7  -3    0.24    0.01
  -5   7  -3    0.01    0.00
   5   7   3    0.01    0.01
   5   7   3    0.02    0.01
  -5   7  -3    0.02    0.01
  -5   7  -3    0.02    0.01
   5   7   3    0.01    0.01
  -5   7  -3    0.02    0.01
  -5   7  -3    0.01    0.01
  -5   7  -3    0.03    0.01
   5   7   3    0.00    0.01
  -5   7  -3    0.01    0.02
  -6   7  -3    2.42    0.06
   6   7   3    2.42    0.06
   6   7   3    2.41    0.05
  -6   7  -3    2.42    0.05
  -6   7  -3    2.50    0.06
  -6   7  -3    2.38    0.05
   6   7   3    2.42    0.06
  -6   7  -3    2.46    0.05
  -6   7  -3    2.36    0.05
  -7   7  -3    2.70    0.06
   7   7   3    2.66    0.05
  -7   7  -3    2.73    0.06
  -7   7  -3    2.70    0.06
  -7   7  -3    2.62    0.06
   7   7   3    2.72    0.06
  -7   7  -3    2.67    0.06
  -8  -7  -3    0.58    0.02
  -8   7  -3    0.52    0.02
   8   7   3    0.55    0.01
  -8   7  -3    0.55    0.02
  -8   7  -3    0.53    0.02
  -8   7  -3    0.53    0.02
  -9  -7  -3    0.40    0.01
  -9   7  -3    0.40    0.01
  -9   7  -3    0.40    0.01
   9   7   3    0.41    0.01
  -9   7  -3    0.40    0.02
   9   8  -3    0.00    0.00
  -9   8   3    0.00    0.00
  -9   8   3    0.00    0.00
  -9   8   3    0.01    0.01
  -8   8   3    0.12    0.01
   8   8  -3    0.12    0.01
  -8   8   3    0.15    0.01
  -8   8   3    0.11    0.01
  -8   8   3    0.12    0.01
  -8   8   3    0.12    0.01
  -8   8   3    0.12    0.01
  -7   8   3    0.01    0.01
  -7   8   3   -0.01    0.01
  -7   8   3    0.00    0.01
  -7   8   3    0.02    0.01
   7   8  -3    0.00    0.00
  -7   8   3    0.00    0.01
   7   8  -3    0.00    0.01
  -7   8   3    0.01    0.01
  -6   8   3    0.12    0.01
  -6   8   3    0.12    0.01
   6   8  -3    0.14    0.01
  -6   8   3    0.13    0.01
  -6   8   3    0.13    0.01
  -6   8   3    0.14    0.01
  -6   8   3    0.14    0.01
  -6   8   3    0.13    0.01
   6   8  -3    0.15    0.01
  -5   8   3    0.69    0.02
  -5   8   3    0.70    0.02
  -5   8   3    0.68    0.02
  -5   8   3    0.67    0.02
   5   8  -3    0.70    0.02
  -5   8   3    0.68    0.02
  -5   8   3    0.69    0.02
   5   8  -3    0.68    0.02
   5   8  -3    0.65    0.02
  -5   8   3    0.69    0.03
  -4  -8   3    0.01    0.01
  -4   8   3    0.00    0.01
  -4   8   3    0.00    0.01
  -4   8   3    0.00    0.01
  -4   8   3    0.01    0.01
  -4   8   3    0.01    0.01
   4   8  -3    0.00    0.01
   4   8  -3   -0.01    0.01
  -4   8   3    0.00    0.01
  -4   8   3    0.00    0.01
   4   8  -3    0.00    0.01
  -4   8   3   -0.01    0.01
  -3  -8   3    0.09    0.01
   3   8  -3    0.06    0.01
  -3   8   3    0.07    0.01
   3   8  -3    0.09    0.01
  -3   8   3    0.08    0.01
   3   8  -3    0.09    0.01
   3   8  -3    0.07    0.01
  -3   8   3    0.07    0.01
  -3   8   3    0.09    0.01
  -3   8   3    0.08    0.01
  -3   8   3    0.07    0.01
  -3   8   3    0.08    0.01
  -2  -8   3    1.36    0.04
  -2   8   3    1.33    0.04
   2   8  -3    1.28    0.04
  -2   8   3    1.35    0.03
   2   8  -3    1.33    0.03
  -2   8   3    1.31    0.04
   2   8  -3    1.29    0.03
  -2   8   3    1.27    0.03
  -2   8   3    1.33    0.03
   2   8  -3    1.34    0.03
  -2   8   3    1.28    0.04
   2   8  -3    1.31    0.04
  -2   8   3    1.32    0.03
  -1  -8   3    0.64    0.02
   1   8  -3    0.65    0.02
   1   8  -3    0.66    0.02
   1   8  -3    0.62    0.02
  -1   8   3    0.65    0.02
  -1   8   3    0.66    0.02
  -1   8   3    0.66    0.02
   1   8  -3    0.61    0.02
  -1   8   3    0.63    0.02
  -1   8   3    0.67    0.02
  -1   8   3    0.66    0.02
  -1   8   3    0.63    0.02
   0  -8   3   -0.01    0.01
   0   8  -3    0.01    0.01
   0   8   3    0.01    0.01
   0   8  -3    0.00    0.00
   0   8   3    0.00    0.01
   0   8  -3   -0.01    0.01
   0   8  -3    0.00    0.01
   0   8   3    0.01    0.01
   0   8   3    0.01    0.01
   0   8   3    0.01    0.01
   0   8  -3    0.01    0.01
   0   8   3    0.00    0.01
   1   8   3    0.33    0.02
   1   8   3    0.36    0.02
  -1   8  -3    0.34    0.02
  -1   8  -3    0.35    0.02
  -1   8  -3    0.37    0.01
   1   8   3    0.32    0.02
  -1   8  -3    0.36    0.02
   1   8   3    0.35    0.02
  -1   8  -3    0.35    0.01
   1   8   3    0.35    0.02
  -1   8  -3    0.36    0.02
   2   8   3    0.20    0.02
   2   8   3    0.19    0.01
  -2   8  -3    0.22    0.01
   2   8   3    0.20    0.01
  -2   8  -3    0.21    0.02
   2   8   3    0.19    0.01
   2   8   3    0.21    0.01
  -2   8  -3    0.21    0.02
  -2   8  -3    0.20    0.02
  -2   8  -3    0.20    0.01
  -2   8  -3    0.20    0.02
  -2   8  -3    0.18    0.02
   3   8   3    0.49    0.02
   3   8   3    0.45    0.02
  -3   8  -3    0.47    0.02
  -3   8  -3    0.46    0.02
  -3   8  -3    0.47    0.02
   3   8   3    0.47    0.02
   3   8   3    0.47    0.02
  -3   8  -3    0.47    0.02
  -3   8  -3    0.47    0.01
  -3   8  -3    0.46    0.01
  -3   8  -3    0.46    0.02
  -3   8  -3    0.41    0.02
  -4   8  -3    0.01    0.01
   4   8   3    0.02    0.01
   4   8   3    0.02    0.01
   4   8   3    0.01    0.01
  -4   8  -3    0.02    0.01
  -4   8  -3    0.00    0.01
   4   8   3    0.02    0.01
  -4   8  -3    0.01    0.01
  -4   8  -3    0.00    0.01
  -4   8  -3    0.02    0.01
  -5   8  -3    0.16    0.01
   5   8   3    0.15    0.01
  -5   8  -3    0.15    0.02
  -5   8  -3    0.17    0.01
  -5   8  -3    0.16    0.01
  -5   8  -3    0.16    0.01
   5   8   3    0.18    0.01
  -5   8  -3    0.16    0.01
  -6   8  -3    0.00    0.01
   6   8   3    0.02    0.01
  -6   8  -3    0.01    0.01
  -6   8  -3    0.01    0.01
  -6   8  -3    0.00    0.01
   6   8   3    0.01    0.01
  -6   8  -3    0.00    0.01
  -6   8  -3    0.00    0.01
  -7   8  -3    0.20    0.02
  -7   8  -3    0.20    0.01
  -7   8  -3    0.19    0.01
   7   8   3    0.18    0.01
  -7   8  -3    0.19    0.01
  -7   8  -3    0.17    0.01
  -8  -8  -3    0.05    0.01
  -8   8  -3    0.05    0.01
  -8   8  -3    0.06    0.01
  -8   8  -3    0.07    0.01
  -8   8  -3    0.06    0.01
  -8   9   3    0.31    0.01
  -7  -9   3    0.71    0.02
  -7   9   3    0.68    0.02
   7   9  -3    0.72    0.02
  -7   9   3    0.74    0.02
  -7   9   3    0.74    0.02
  -7   9   3    0.70    0.02
  -7   9   3    0.73    0.02
  -7   9   3    0.75    0.02
  -6   9   3    0.02    0.01
  -6   9   3    0.02    0.01
   6   9  -3    0.02    0.00
  -6   9   3    0.01    0.01
  -6   9   3    0.01    0.01
  -6   9   3    0.02    0.01
  -6   9   3    0.02    0.01
  -6   9   3    0.01    0.00
  -5   9   3    0.76    0.02
  -5   9   3    0.77    0.02
  -5   9   3    0.76    0.02
  -5   9   3    0.78    0.03
  -5   9   3    0.78    0.02
   5   9  -3    0.80    0.02
  -5   9   3    0.74    0.02
  -5   9   3    0.78    0.03
  -4   9   3    0.85    0.03
  -4   9   3    0.86    0.03
  -4   9   3    0.81    0.02
   4   9  -3    0.82    0.02
  -4   9   3    0.81    0.03
  -4   9   3    0.82    0.02
  -4   9   3    0.80    0.03
  -4   9   3    0.83    0.03
  -4   9   3    0.81    0.02
  -3  -9   3    0.54    0.02
  -3   9   3    0.57    0.02
  -3   9   3    0.62    0.02
   3   9  -3    0.58    0.02
  -3   9   3    0.58    0.02
  -3   9   3    0.58    0.02
  -3   9   3    0.59    0.02
  -3   9   3    0.62    0.02
   3   9  -3    0.61    0.02
  -3   9   3    0.60    0.02
  -2  -9   3    1.17    0.03
  -2   9   3    1.21    0.03
  -2   9   3    1.16    0.03
  -2   9   3    1.20    0.03
  -2   9   3    1.14    0.03
   2   9  -3    1.15    0.03
   2   9  -3    1.13    0.03
  -2   9   3    1.15    0.03
  -2   9   3    1.18    0.03
   2   9  -3    1.19    0.03
  -2   9   3    1.15    0.03
  -1  -9   3    0.05    0.01
  -1   9   3    0.07    0.01
  -1   9   3    0.06    0.01
   1   9  -3    0.06    0.01
  -1   9   3    0.07    0.01
  -1   9   3    0.05    0.01
  -1   9   3    0.07    0.01
   1   9  -3    0.06    0.00
   1   9  -3    0.05    0.01
  -1   9   3    0.07    0.01
  -1   9   3    0.05    0.01
   1   9  -3    0.08    0.01
   0  -9   3    0.02    0.01
   0   9   3    0.00    0.01
   0   9  -3    0.01    0.01
   0   9  -3    0.01    0.01
   0   9   3    0.01    0.01
   0   9   3    0.01    0.01
   0   9  -3    0.02    0.01
   0   9  -3    0.01    0.01
   0   9   3    0.02    0.01
   0   9   3    0.02    0.01
   1  -9   3    0.31    0.02
   1   9   3    0.30    0.02
   1   9   3    0.31    0.02
  -1   9  -3    0.31    0.02
   1   9   3    0.29    0.01
   1   9   3    0.29    0.01
  -1   9  -3    0.31    0.01
  -1   9  -3    0.27    0.02
  -1   9  -3    0.28    0.02
   1   9   3    0.27    0.02
  -1   9  -3    0.32    0.02
   2  -9   3    0.08    0.01
   2   9   3    0.08    0.01
  -2   9  -3    0.08    0.01
   2   9   3    0.09    0.01
  -2   9  -3    0.08    0.01
  -2   9  -3    0.09    0.01
   2   9   3    0.10    0.01
  -2   9  -3    0.08    0.01
   2   9   3    0.10    0.01
  -2   9  -3    0.09    0.01
   2   9   3    0.08    0.01
  -3   9  -3    0.01    0.01
   3   9   3    0.00    0.01
  -3   9  -3    0.00    0.01
  -3   9  -3    0.00    0.01
  -3   9  -3    0.01    0.01
  -3   9  -3    0.00    0.01
   3   9   3    0.01    0.01
   3   9   3    0.01    0.01
   3   9   3    0.01    0.01
  -3   9  -3    0.00    0.01
   4   9   3    0.08    0.01
   4   9   3    0.09    0.01
   4   9   3    0.07    0.01
  -4   9  -3    0.08    0.01
  -4   9  -3    0.08    0.01
  -4   9  -3    0.08    0.01
  -4   9  -3    0.08    0.01
   4   9   3    0.08    0.01
  -4   9  -3    0.08    0.01
   5   9   3    0.01    0.01
   5   9   3    0.00    0.01
  -5   9  -3    0.00    0.01
  -5   9  -3    0.00    0.01
  -5   9  -3    0.00    0.00
  -5   9  -3    0.01    0.01
  -5   9  -3    0.00    0.01
  -6   9  -3    0.07    0.01
   6   9   3    0.07    0.01
  -6   9  -3    0.06    0.01
   6   9   3    0.05    0.01
  -6   9  -3    0.06    0.01
  -6   9  -3    0.06    0.01
  -6   9  -3    0.06    0.01
  -6   9  -3    0.06    0.01
  -7  -9  -3    0.03    0.01
  -7   9  -3    0.03    0.01
  -7   9  -3    0.03    0.01
  -7   9  -3    0.04    0.01
  -7   9  -3    0.03    0.01
  -7   9  -3    0.04    0.01
  -6  10   3    0.05    0.01
  -6  10   3    0.05    0.01
  -6  10   3    0.05    0.00
  -6  10   3    0.03    0.01
  -6  10   3    0.04    0.01
  -6  10   3    0.04    0.01
  -5  10   3    0.06    0.01
  -5  10   3    0.07    0.01
  -5  10   3    0.06    0.01
  -5  10   3    0.05    0.01
  -5  10   3    0.07    0.01
  -5  10   3    0.07    0.01
  -4  10   3    0.09    0.01
  -4  10   3    0.09    0.01
  -4  10   3    0.07    0.01
  -4  10   3    0.07    0.01
  -4  10   3    0.07    0.01
  -4  10   3    0.09    0.01
  -3  10   3    0.02    0.01
  -3  10   3    0.04    0.01
  -3  10   3    0.03    0.01
   3  10  -3    0.03    0.01
  -3  10   3    0.03    0.01
  -3  10   3    0.03    0.01
  -3  10   3    0.03    0.01
  -3  10   3    0.03    0.01
  -2  10   3    0.18    0.01
  -2  10   3    0.15    0.01
  -2  10   3    0.17    0.01
  -2  10   3    0.13    0.01
  -2  10   3    0.18    0.01
   2  10  -3    0.14    0.01
  -2  10   3    0.19    0.01
  -2  10   3    0.16    0.01
  -1 -10   3    0.01    0.01
   1  10  -3    0.00    0.01
  -1  10   3    0.01    0.01
   1  10  -3    0.00    0.01
  -1  10   3    0.02    0.01
  -1  10   3    0.01    0.01
  -1  10   3    0.00    0.01
  -1  10   3    0.01    0.01
  -1  10   3    0.00    0.01
  -1  10   3    0.02    0.01
   0 -10   3    0.11    0.01
   0  10  -3    0.12    0.01
   0  10   3    0.13    0.01
   0  10  -3    0.12    0.01
   0  10  -3    0.10    0.01
   0  10   3    0.10    0.01
   0  10   3    0.11    0.01
   0  10   3    0.13    0.01
   0  10   3    0.12    0.01
   1 -10   3    0.15    0.01
  -1  10  -3    0.15    0.01
  -1  10  -3    0.15    0.01
  -1  10  -3    0.17    0.01
  -1  10  -3    0.16    0.01
   1  10   3    0.16    0.01
   1  10   3    0.16    0.01
  -1  10  -3    0.18    0.01
   1  10   3    0.13    0.01
   1  10   3    0.12    0.01
   1  10   3    0.12    0.01
   2 -10   3    0.29    0.01
  -2  10  -3    0.29    0.01
   2  10   3    0.30    0.01
   2  10   3    0.30    0.01
   2  10   3    0.29    0.01
  -2  10  -3    0.30    0.01
  -2  10  -3    0.27    0.02
   2  10   3    0.30    0.01
  -2  10  -3    0.30    0.01
  -2  10  -3    0.29    0.02
   2  10   3    0.29    0.02
   3 -10   3    0.00    0.01
  -3  10  -3    0.01    0.01
   3  10   3    0.00    0.01
  -3  10  -3   -0.01    0.01
   3  10   3   -0.01    0.01
  -3  10  -3    0.01    0.01
  -3  10  -3    0.01    0.01
   3  10   3    0.01    0.01
   3  10   3    0.00    0.00
  -3  10  -3    0.00    0.00
   4 -10   3    0.06    0.01
   4  10   3    0.07    0.01
  -4  10  -3    0.07    0.01
   4  10   3    0.06    0.01
  -4  10  -3    0.07    0.01
  -4  10  -3    0.07    0.01
   4  10   3    0.06    0.01
  -4  10  -3    0.06    0.01
   5 -10   3    0.08    0.01
  -5  10  -3    0.08    0.01
  -5  10  -3    0.08    0.01
  -5  10  -3    0.08    0.01
   5  10   3    0.07    0.01
  -5  10  -3    0.10    0.01
   6 -10   3    0.00    0.00
  -6  10  -3    0.00    0.00
  -6  10  -3    0.01    0.00
  -3  11   3    0.05    0.01
  -3  11   3    0.04    0.01
  -3  11   3    0.05    0.00
  -3  11   3    0.04    0.01
  -3  11   3    0.04    0.01
  -3  11   3    0.04    0.00
  -3  11   3    0.05    0.01
  -2  11   3    0.03    0.01
  -2  11   3    0.03    0.01
  -2  11   3    0.03    0.01
  -2  11   3    0.03    0.00
  -2  11   3    0.04    0.01
  -2  11   3    0.03    0.00
  -1  11   3    0.14    0.01
  -1  11   3    0.14    0.01
  -1  11   3    0.14    0.01
  -1  11   3    0.14    0.01
   1  11  -3    0.16    0.01
  -1  11   3    0.13    0.01
   0  11   3    0.01    0.00
   0  11  -3    0.02    0.01
   0  11   3    0.01    0.00
   0  11   3    0.00    0.01
   0  11   3    0.01    0.00
   0  11   3    0.00    0.00
   1 -11   3    0.00    0.00
   1  11   3    0.00    0.00
   1  11   3    0.00    0.00
   1  11   3    0.01    0.01
   1  11   3    0.01    0.01
  -1  11  -3    0.00    0.00
   1  11   3    0.01    0.00
  -1  11  -3    0.01    0.00
   2 -11   3    0.05    0.01
   2  11   3    0.03    0.01
   2  11   3    0.05    0.01
   2  11   3    0.04    0.00
  -2  11  -3    0.06    0.01
  -2  11  -3    0.05    0.01
  -2  11  -3    0.05    0.01
   2  11   3    0.05    0.01
  -2  11  -3    0.06    0.00
  -3  11  -3    0.01    0.01
  -3  11  -3    0.00    0.00
  -3  11  -3    0.00    0.01
  -3  11  -3    0.00    0.00
   3  11   3    0.00    0.00
 -12   0   4    0.02    0.00
  12   0  -4    0.02    0.01
 -11   0   4    0.00    0.01
 -11   0   4    0.00    0.01
  11   0  -4    0.00    0.01
 -11   0   4    0.00    0.00
 -11   0   4    0.00    0.01
 -10   0   4   -0.01    0.00
 -10   0   4   -0.01    0.01
 -10   0   4    0.00    0.01
 -10   0   4    0.01    0.01
  10   0  -4    0.00    0.01
  -9   0   4    0.00    0.01
  -9   0   4    0.00    0.01
  -9   0   4    0.02    0.01
   9   0  -4    0.00    0.01
  -9   0   4    0.00    0.01
   8   0  -4    0.24    0.02
  -8   0   4    0.22    0.02
  -8   0   4    0.24    0.02
  -8   0   4    0.23    0.01
   8   0  -4    0.25    0.02
   7   0  -4    0.00    0.01
   7   0  -4    0.01    0.01
   7   0  -4    0.00    0.01
   7   0  -4   -0.01    0.01
   6   0  -4    3.35    0.07
   6   0  -4    3.30    0.08
   6   0  -4    3.43    0.08
   6   0  -4    3.29    0.09
   5   0  -4    0.00    0.00
   5   0  -4    0.01    0.01
   5   0  -4   -0.01    0.01
   5   0  -4    0.00    0.01
   4   0  -4   13.28    0.29
   4   0  -4   13.92    0.28
   4   0  -4   13.86    0.30
   4   0  -4   14.14    0.32
   3   0  -4   -0.05    0.00
   3   0  -4   -0.05    0.01
   3   0  -4   -0.04    0.00
   3   0  -4   -0.04    0.01
   2   0  -4    2.59    0.06
   2   0  -4    2.53    0.05
   2   0  -4    2.40    0.06
   2   0  -4    2.53    0.06
   1   0  -4   -0.10    0.00
   1   0  -4   -0.10    0.00
   1   0  -4   -0.10    0.00
   1   0  -4   -0.09    0.00
   0   0  -4   48.53    1.04
   0   0   4   49.39    1.02
   0   0  -4   50.27    1.00
   0   0  -4   49.02    1.14
   1   0   4   -0.01    0.00
  -1   0  -4   -0.01    0.00
  -1   0  -4    0.00    0.01
  -1   0  -4    0.00    0.00
   1   0   4    0.00    0.00
   2   0   4   62.80    1.36
  -2   0  -4   61.42    1.27
  -2   0  -4   60.32    1.32
   2   0   4   63.49    1.29
  -2   0  -4   63.70    1.44
  -3   0  -4   -0.02    0.01
   3   0   4   -0.02    0.00
  -3   0  -4   -0.02    0.01
   3   0   4   -0.02    0.01
   3   0   4   -0.02    0.00
   3   0   4   -0.02    0.01
  -3   0  -4   -0.02    0.01
   4   0   4    6.27    0.14
  -4   0  -4    6.31    0.13
  -4   0  -4    6.29    0.14
  -4   0  -4    6.44    0.15
   4   0   4    6.40    0.14
  -5   0  -4    0.00    0.01
   5   0   4    0.00    0.01
   5   0   4    0.00    0.01
   6   0   4    0.08    0.01
   6   0   4    0.08    0.01
  -6   0  -4    0.06    0.01
   7   0   4    0.01    0.01
   8   0   4    0.14    0.01
   8   0   4    0.16    0.01
   9   0   4    0.00    0.01
  10   0   4    0.03    0.01
 -10   0  -4    0.02    0.01
 -11   0  -4    0.00    0.01
 -11   0  -4    0.00    0.00
 -12   0  -4    0.20    0.01
 -12   0  -4    0.22    0.01
 -12   0  -4    0.21    0.01
  12  -1  -4    0.14    0.01
 -12  -1   4    0.15    0.01
 -12  -1   4    0.15    0.01
 -12   1   4    0.14    0.01
  12   1  -4    0.15    0.01
 -11  -1   4    0.00    0.01
 -11  -1   4    0.00    0.01
  11  -1  -4    0.00    0.01
 -11  -1   4    0.00    0.00
 -11  -1   4    0.01    0.01
 -11   1   4    0.00    0.00
 -11   1   4    0.00    0.01
 -11   1   4    0.00    0.00
  11   1  -4    0.01    0.01
 -11   1   4    0.01    0.01
 -10  -1   4    0.15    0.01
  10  -1  -4    0.15    0.01
 -10  -1   4    0.16    0.01
 -10  -1   4    0.15    0.01
 -10  -1   4    0.15    0.01
 -10   1   4    0.14    0.01
 -10   1   4    0.12    0.01
  10   1  -4    0.13    0.01
 -10   1   4    0.13    0.01
 -10   1   4    0.15    0.01
  -9  -1   4    0.03    0.01
  -9  -1   4    0.02    0.01
  -9  -1   4    0.02    0.01
   9   1  -4    0.01    0.01
  -9   1   4    0.03    0.00
  -9   1   4    0.04    0.01
  -9   1   4    0.04    0.01
  -9   1   4    0.03    0.01
  -9   1   4    0.05    0.01
   8  -1  -4    1.80    0.06
   8  -1  -4    1.77    0.05
   8  -1  -4    1.81    0.05
   8  -1  -4    1.81    0.05
  -8  -1   4    1.76    0.04
  -8  -1   4    1.84    0.05
   8   1  -4    1.79    0.05
  -8   1   4    1.80    0.04
  -8   1   4    1.75    0.04
  -8   1   4    1.83    0.05
   8   1  -4    1.70    0.04
  -8   1   4    1.84    0.04
   8   1  -4    1.82    0.05
   7  -1  -4    0.46    0.02
   7  -1  -4    0.46    0.02
   7  -1  -4    0.44    0.02
   7  -1  -4    0.44    0.02
   7   1  -4    0.43    0.02
   7   1  -4    0.48    0.02
   6  -1  -4    0.46    0.02
   6  -1  -4    0.46    0.02
   6  -1  -4    0.44    0.02
   6  -1  -4    0.44    0.02
   6   1  -4    0.40    0.02
   6   1  -4    0.41    0.02
   6   1  -4    0.44    0.02
   6   1  -4    0.41    0.02
   5  -1  -4    0.05    0.01
   5  -1  -4    0.06    0.01
   5  -1  -4    0.07    0.01
   5  -1  -4    0.06    0.01
   5   1  -4    0.06    0.01
   5   1  -4    0.06    0.01
   5   1  -4    0.06    0.01
   5   1  -4    0.05    0.01
   4  -1  -4    0.04    0.01
   4  -1  -4    0.04    0.01
   4  -1  -4    0.06    0.01
   4  -1  -4    0.04    0.01
   4   1  -4    0.03    0.01
   4   1  -4    0.05    0.01
   4   1  -4    0.03    0.01
   4   1  -4    0.04    0.01
   3  -1  -4    3.66    0.09
   3  -1  -4    3.84    0.08
   3  -1  -4    3.96    0.09
   3   1  -4    3.71    0.08
   3   1  -4    3.81    0.09
   3   1  -4    3.76    0.08
   3   1  -4    3.73    0.08
   2  -1  -4    8.43    0.17
   2  -1  -4    8.46    0.19
   2  -1  -4    8.39    0.18
   2   1  -4    8.03    0.19
   2   1  -4    8.34    0.19
   2   1  -4    7.97    0.18
   2   1  -4    7.98    0.17
   2   1  -4    8.14    0.17
   1  -1  -4    6.46    0.15
   1   1  -4    6.11    0.15
   1   1  -4    6.23    0.13
   1   1  -4    6.39    0.15
   1   1  -4    6.22    0.13
   0  -1  -4   13.40    0.30
   0  -1  -4   13.99    0.27
   0  -1   4   12.40    0.27
   0   1  -4   12.34    0.26
   0   1  -4   11.89    0.30
   0   1  -4   12.46    0.27
   0   1  -4   12.47    0.29
  -1  -1  -4    5.58    0.13
  -1  -1  -4    5.45    0.12
   1  -1   4    5.29    0.12
  -1  -1  -4    5.73    0.11
   1  -1   4    5.44    0.11
   1  -1   4    5.36    0.12
   1   1   4    5.41    0.12
  -1   1  -4    5.62    0.12
  -1   1  -4    5.45    0.11
  -1   1  -4    5.50    0.13
   1   1   4    5.50    0.12
  -1   1  -4    6.03    0.13
   2  -1   4    0.16    0.01
   2  -1   4    0.15    0.01
   2  -1   4    0.13    0.01
  -2  -1  -4    0.13    0.01
   2  -1   4    0.12    0.01
  -2  -1  -4    0.13    0.01
  -2  -1  -4    0.13    0.01
   2   1   4    0.13    0.01
  -2   1  -4    0.15    0.01
  -2   1  -4    0.15    0.01
  -2   1  -4    0.15    0.01
   2   1   4    0.13    0.01
   3  -1   4    1.04    0.03
   3  -1   4    1.01    0.03
   3  -1   4    1.06    0.03
  -3  -1  -4    1.00    0.03
  -3  -1  -4    1.09    0.03
  -3  -1  -4    1.04    0.03
   3  -1   4    1.05    0.03
   3   1   4    1.06    0.03
  -3   1  -4    1.03    0.03
  -3   1  -4    1.02    0.03
   3   1   4    1.05    0.03
  -3   1  -4    1.13    0.03
   4  -1   4    0.36    0.01
  -4  -1  -4    0.30    0.01
   4  -1   4    0.33    0.01
   4  -1   4    0.34    0.01
  -4  -1  -4    0.33    0.01
  -4  -1  -4    0.31    0.01
   4  -1   4    0.35    0.02
   4  -1   4    0.32    0.02
  -4   1  -4    0.30    0.02
   4   1   4    0.35    0.01
   4   1   4    0.35    0.01
   5  -1   4    0.95    0.03
   5  -1   4    0.97    0.03
   5   1   4    0.95    0.03
  -5   1  -4    0.99    0.03
   5   1   4    0.98    0.03
   6  -1   4    3.98    0.09
   6  -1   4    3.78    0.09
  -6   1  -4    3.80    0.10
   6   1   4    3.90    0.09
   6   1   4    3.85    0.09
   7  -1   4    1.15    0.03
   7  -1   4    1.19    0.04
  -7   1  -4    1.21    0.04
   7   1   4    1.16    0.04
   8  -1   4    1.04    0.03
  -8  -1  -4    1.03    0.02
   8  -1   4    0.97    0.03
   8   1   4    1.01    0.03
   8   1   4    1.01    0.03
   9  -1   4    0.30    0.02
   9   1   4    0.30    0.01
  -9   1  -4    0.29    0.02
  10  -1   4    0.12    0.01
 -10   1  -4    0.14    0.01
 -10   1  -4    0.13    0.01
 -11  -1  -4    0.01    0.01
 -11   1  -4    0.01    0.00
 -11   1  -4    0.02    0.01
 -12  -1  -4    0.02    0.00
 -12  -1  -4    0.03    0.01
 -12   1  -4    0.03    0.00
 -12   1  -4    0.02    0.00
 -12  -2   4    0.16    0.01
  12  -2  -4    0.17    0.01
 -12   2   4    0.14    0.01
 -11  -2   4    0.11    0.01
 -11  -2   4    0.12    0.01
 -11  -2   4    0.11    0.01
 -11  -2   4    0.12    0.01
  11  -2  -4    0.10    0.01
  11   2  -4    0.11    0.01
 -11   2   4    0.11    0.01
 -11   2   4    0.11    0.01
 -10  -2   4    0.32    0.02
 -10  -2   4    0.33    0.02
  10  -2  -4    0.30    0.02
 -10  -2   4    0.31    0.01
 -10   2   4    0.32    0.01
 -10   2   4    0.35    0.02
 -10   2   4    0.32    0.01
  10   2  -4    0.30    0.02
 -10   2   4    0.30    0.01
  -9  -2   4    0.05    0.01
  -9  -2   4    0.09    0.01
  -9   2   4    0.07    0.01
  -9   2   4    0.07    0.01
  -9   2   4    0.07    0.01
  -9   2   4    0.07    0.01
   9   2  -4    0.06    0.01
  -9   2   4    0.07    0.01
   8  -2  -4    0.02    0.01
   8  -2  -4    0.03    0.01
   8  -2  -4    0.03    0.01
   8  -2  -4    0.02    0.01
  -8  -2   4    0.03    0.01
  -8  -2   4    0.03    0.01
  -8   2   4    0.03    0.01
   8   2  -4    0.03    0.01
  -8   2   4    0.03    0.01
  -8   2   4    0.03    0.01
   8   2  -4    0.02    0.01
  -8   2   4    0.03    0.01
  -8   2   4    0.03    0.01
  -8   2   4    0.03    0.00
   8   2  -4    0.02    0.01
   7  -2  -4    0.00    0.01
   7  -2  -4    0.01    0.01
   7  -2  -4    0.00    0.01
   7  -2  -4   -0.01    0.01
   7   2  -4    0.00    0.01
   7   2  -4    0.02    0.01
   6  -2  -4    1.76    0.04
   6  -2  -4    1.78    0.05
   6  -2  -4    1.74    0.05
   6  -2  -4    1.74    0.04
   6   2  -4    1.74    0.05
   6   2  -4    1.79    0.05
   5  -2  -4    0.00    0.00
   5  -2  -4    0.00    0.00
   5  -2  -4   -0.01    0.01
   5  -2  -4    0.00    0.01
   5   2  -4    0.00    0.01
   5   2  -4    0.00    0.00
   5   2  -4    0.00    0.01
   4  -2  -4    2.17    0.05
   4  -2  -4    2.22    0.06
   4  -2  -4    2.24    0.05
   4  -2  -4    2.19    0.05
   4   2  -4    2.20    0.05
   4   2  -4    2.17    0.06
   4   2  -4    2.17    0.05
   4   2  -4    2.21    0.06
   4   2  -4    2.21    0.05
   3  -2  -4    1.00    0.03
   3  -2  -4    0.90    0.02
   3  -2  -4    1.07    0.02
   3   2  -4    0.93    0.03
   3   2  -4    1.00    0.03
   3   2  -4    1.02    0.03
   3   2  -4    1.01    0.03
   3   2  -4    1.02    0.02
  -2  -2   4    3.79    0.09
  -2  -2   4    3.84    0.08
   2  -2  -4    4.01    0.09
  -2  -2   4    3.91    0.08
   2   2  -4    3.96    0.09
   2   2  -4    4.17    0.09
   2   2  -4    4.02    0.09
   2   2  -4    4.03    0.09
   2   2  -4    3.98    0.08
  -1  -2   4    4.48    0.09
  -1  -2   4    4.36    0.10
  -1  -2   4    4.52    0.09
   1   2  -4    4.58    0.10
   1   2  -4    4.39    0.10
   1   2  -4    4.44    0.10
   1   2  -4    4.47    0.09
   0  -2   4   24.49    0.50
   0  -2   4   24.79    0.48
   0  -2   4   23.40    0.50
   0   2  -4   24.28    0.48
   0   2  -4   23.63    0.50
   0   2  -4   23.94    0.55
   0   2  -4   22.96    0.55
   1  -2   4    4.27    0.09
   1  -2   4    4.10    0.08
  -1  -2  -4    4.21    0.08
  -1  -2  -4    3.84    0.09
  -1  -2  -4    4.17    0.09
   1  -2   4    4.01    0.09
   1  -2   4    4.17    0.09
  -1   2  -4    3.93    0.10
  -1   2  -4    4.02    0.08
   1   2   4    3.97    0.09
  -1   2  -4    3.89    0.09
  -1   2  -4    4.12    0.10
   2  -2   4    0.86    0.02
   2  -2   4    0.85    0.02
  -2  -2  -4    0.86    0.02
   2  -2   4    0.89    0.02
   2  -2   4    0.88    0.02
  -2  -2  -4    0.88    0.02
  -2  -2  -4    0.86    0.02
  -2   2  -4    0.83    0.02
  -2   2  -4    0.88    0.03
   2   2   4    0.83    0.02
   2   2   4    0.79    0.02
   3  -2   4   16.14    0.35
   3  -2   4   16.68    0.34
  -3  -2  -4   16.10    0.34
   3  -2   4   16.18    0.36
   3  -2   4   16.20    0.33
  -3  -2  -4   16.31    0.33
  -3   2  -4   16.61    0.38
   3   2   4   16.36    0.36
   4  -2   4    5.68    0.13
  -4  -2  -4    5.77    0.13
   4  -2   4    5.95    0.12
   4  -2   4    5.59    0.13
  -4  -2  -4    5.67    0.12
   4  -2   4    5.70    0.12
   4   2   4    5.70    0.13
  -4   2  -4    5.81    0.14
  -5  -2  -4    0.32    0.02
   5  -2   4    0.34    0.01
  -5  -2  -4    0.37    0.02
   5  -2   4    0.33    0.02
   5  -2   4    0.34    0.02
   5   2   4    0.33    0.02
  -5   2  -4    0.36    0.02
   6  -2   4    0.01    0.01
   6  -2   4    0.00    0.01
   6   2   4    0.00    0.01
  -6   2  -4    0.00    0.01
   7  -2   4    0.61    0.02
  -7  -2  -4    0.60    0.02
   7  -2   4    0.62    0.02
   7   2   4    0.61    0.02
  -7   2  -4    0.60    0.03
   8  -2   4    0.71    0.02
  -8  -2  -4    0.65    0.02
  -8   2  -4    0.61    0.02
  -8   2  -4    0.61    0.02
  -9  -2  -4    0.46    0.01
   9  -2   4    0.44    0.02
  -9   2  -4    0.43    0.02
  -9   2  -4    0.42    0.02
  10  -2   4    0.06    0.01
 -10   2  -4    0.05    0.01
 -10   2  -4    0.05    0.01
 -11   2  -4    0.14    0.01
 -11   2  -4    0.14    0.01
 -11   2  -4    0.13    0.01
 -11   2  -4    0.13    0.01
 -12  -2  -4    0.10    0.01
 -12  -2  -4    0.10    0.01
 -12   2  -4    0.11    0.00
  12   2   4    0.11    0.01
 -12   2  -4    0.09    0.01
 -12  -3   4    0.01    0.00
  12  -3  -4    0.03    0.01
 -12  -3   4    0.02    0.01
 -12   3   4    0.02    0.01
  11  -3  -4    0.14    0.01
 -11  -3   4    0.13    0.01
 -11  -3   4    0.14    0.01
 -11  -3   4    0.13    0.01
 -11   3   4    0.14    0.01
 -11   3   4    0.14    0.01
 -11   3   4    0.13    0.01
 -10  -3   4    0.06    0.01
 -10  -3   4    0.08    0.01
 -10   3   4    0.05    0.01
  10   3  -4    0.06    0.01
 -10   3   4    0.06    0.01
 -10   3   4    0.07    0.01
  -9  -3   4    0.06    0.01
  -9  -3   4    0.04    0.01
   9   3  -4    0.05    0.01
  -9   3   4    0.06    0.01
  -9   3   4    0.06    0.01
  -9   3   4    0.07    0.01
  -9   3   4    0.07    0.01
  -8  -3   4    0.50    0.02
  -8   3   4    0.49    0.02
  -8   3   4    0.51    0.02
   8   3  -4    0.50    0.02
  -8   3   4    0.52    0.02
  -8   3   4    0.50    0.02
  -8   3   4    0.49    0.01
  -8   3   4    0.49    0.02
  -8   3   4    0.48    0.02
  -7  -3   4    0.46    0.02
   7  -3  -4    0.46    0.02
   7  -3  -4    0.49    0.02
   7  -3  -4    0.46    0.03
   7  -3  -4    0.46    0.02
   7   3  -4    0.46    0.02
  -7   3   4    0.49    0.02
   7   3  -4    0.45    0.02
   7   3  -4    0.45    0.02
  -7   3   4    0.44    0.02
   6  -3  -4    0.10    0.01
   6  -3  -4    0.10    0.01
   6  -3  -4    0.12    0.01
   6  -3  -4    0.11    0.01
   6   3  -4    0.10    0.01
   6   3  -4    0.11    0.01
   5  -3  -4    0.95    0.03
   5  -3  -4    1.01    0.02
   5  -3  -4    0.94    0.03
   5  -3  -4    0.93    0.03
   5   3  -4    1.08    0.03
   5   3  -4    0.93    0.03
   4  -3  -4    5.30    0.11
   4  -3  -4    5.27    0.12
   4  -3  -4    5.25    0.11
   4   3  -4    5.11    0.13
   4   3  -4    5.26    0.12
   3  -3  -4    6.19    0.13
   3  -3  -4    5.80    0.13
   3  -3  -4    5.64    0.13
   3   3  -4    5.96    0.14
   3   3  -4    5.89    0.13
  -2  -3   4    0.39    0.01
   2  -3  -4    0.39    0.01
  -2  -3   4    0.40    0.01
  -2  -3   4    0.40    0.01
   2   3  -4    0.40    0.02
   2   3  -4    0.38    0.02
  -1  -3   4   11.03    0.23
  -1  -3   4   10.89    0.23
  -1  -3   4   11.03    0.22
   1   3  -4   11.19    0.25
   1   3  -4   10.82    0.25
   0  -3  -4    4.10    0.09
   0  -3   4    3.98    0.09
   0  -3   4    4.06    0.08
   0  -3   4    4.12    0.09
   0  -3  -4    3.80    0.09
   0   3  -4    4.22    0.10
   0   3  -4    4.08    0.10
   1  -3   4    7.14    0.15
   1  -3   4    7.09    0.15
   1  -3   4    7.10    0.15
  -1  -3  -4    7.38    0.15
  -1   3  -4    7.03    0.17
  -1   3  -4    6.87    0.16
  -2  -3  -4   19.57    0.38
   2  -3   4   18.67    0.40
   2  -3   4   19.00    0.39
   2  -3   4   18.68    0.38
   2  -3   4   19.00    0.41
  -2  -3  -4   18.82    0.40
  -2   3  -4   18.36    0.43
   2   3   4   18.41    0.41
   2   3   4   18.63    0.43
   3  -3   4    2.75    0.06
  -3  -3  -4    2.68    0.06
   3  -3   4    2.65    0.06
   3  -3   4    2.68    0.07
  -3  -3  -4    2.69    0.06
   3  -3   4    2.73    0.06
   3   3   4    2.65    0.06
  -3   3  -4    2.74    0.07
   4  -3   4    0.23    0.01
  -4  -3  -4    0.23    0.01
  -4  -3  -4    0.25    0.01
   4  -3   4    0.25    0.01
   4  -3   4    0.25    0.02
   4  -3   4    0.24    0.01
   4   3   4    0.23    0.01
  -4   3  -4    0.22    0.02
  -5  -3  -4    0.08    0.01
  -5  -3  -4    0.12    0.01
   5  -3   4    0.11    0.01
   5  -3   4    0.10    0.01
   5  -3   4    0.10    0.01
   5  -3   4    0.11    0.01
   5   3   4    0.09    0.01
  -5   3  -4    0.10    0.01
   6  -3   4    0.09    0.01
   6  -3   4    0.10    0.01
  -6   3  -4    0.09    0.01
   6   3   4    0.09    0.01
   7  -3   4    0.04    0.01
   7  -3   4   -0.01    0.01
  -7  -3  -4    0.00    0.01
   7  -3   4   -0.01    0.01
   7   3   4    0.01    0.01
   7   3   4    0.02    0.01
  -7   3  -4    0.00    0.01
  -7   3  -4    0.01    0.01
  -8  -3  -4    1.83    0.04
   8  -3   4    1.79    0.04
  -8   3  -4    1.80    0.04
   9  -3   4    0.22    0.02
  -9  -3  -4    0.21    0.01
  -9   3  -4    0.23    0.01
  10  -3   4    0.11    0.01
 -10   3  -4    0.10    0.01
 -10   3  -4    0.11    0.01
  10   3   4    0.10    0.01
 -10   3  -4    0.11    0.01
 -11   3  -4    1.05    0.02
 -11   3  -4    1.11    0.03
  11   3   4    1.05    0.03
 -12   3  -4    0.40    0.01
 -11  -4   4    0.18    0.01
 -11  -4   4    0.20    0.01
 -11  -4   4    0.21    0.01
  11  -4  -4    0.17    0.01
 -11   4   4    0.17    0.01
 -11   4   4    0.18    0.01
 -11   4   4    0.18    0.01
 -10  -4   4    0.25    0.02
 -10  -4   4    0.28    0.02
 -10   4   4    0.26    0.01
 -10   4   4    0.31    0.01
 -10   4   4    0.26    0.01
  -9  -4   4    0.11    0.01
  -9   4   4    0.10    0.01
  -9   4   4    0.11    0.01
  -9   4   4    0.12    0.01
   9   4  -4    0.11    0.01
  -9   4   4    0.10    0.01
  -9   4   4    0.09    0.01
  -8  -4   4    0.02    0.01
  -8   4   4    0.01    0.01
  -8   4   4   -0.01    0.01
  -8   4   4    0.01    0.01
  -8   4   4    0.01    0.01
   8   4  -4    0.00    0.01
  -8   4   4    0.01    0.01
  -8   4   4    0.00    0.01
   7  -4  -4    0.08    0.01
   7  -4  -4    0.09    0.01
   7  -4  -4    0.09    0.01
   7  -4  -4    0.10    0.01
  -7  -4   4    0.10    0.01
  -7   4   4    0.11    0.01
  -7   4   4    0.10    0.01
   7   4  -4    0.09    0.01
  -7   4   4    0.09    0.01
   7   4  -4    0.09    0.01
  -7   4   4    0.08    0.01
  -7   4   4    0.10    0.01
  -7   4   4    0.09    0.01
   6  -4  -4    0.90    0.04
   6  -4  -4    0.91    0.03
   6  -4  -4    0.90    0.03
   6  -4  -4    0.95    0.03
  -6   4   4    0.94    0.02
   6   4  -4    0.87    0.03
   6   4  -4    0.84    0.03
   5  -4  -4    1.56    0.05
   5  -4  -4    1.53    0.05
   5  -4  -4    1.57    0.04
   5  -4  -4    1.50    0.04
   5   4  -4    1.52    0.05
   5   4  -4    1.52    0.04
   4  -4  -4    5.23    0.11
   4  -4  -4    4.91    0.12
   4  -4  -4    5.29    0.11
   4   4  -4    4.97    0.12
   4   4  -4    5.19    0.12
   3  -4  -4    0.92    0.03
   3  -4  -4    0.92    0.03
   3  -4  -4    0.93    0.02
   3   4  -4    0.86    0.03
  -2  -4   4   19.33    0.41
   2  -4  -4   19.40    0.41
  -2  -4   4   19.50    0.40
  -2  -4   4   19.50    0.40
   2  -4  -4   19.41    0.40
   2   4  -4   19.31    0.45
  -1  -4   4    5.74    0.12
  -1  -4   4    5.99    0.13
   1  -4  -4    5.92    0.13
  -1  -4   4    5.90    0.13
   1   4  -4    5.98    0.14
   0  -4   4   11.70    0.25
   0  -4   4   11.65    0.25
   0  -4  -4   12.04    0.25
   0  -4   4   12.08    0.24
   0   4  -4   12.10    0.27
   0   4  -4   11.70    0.28
   1  -4   4    1.62    0.04
  -1  -4  -4    1.66    0.04
   1  -4   4    1.62    0.04
  -1  -4  -4    1.63    0.04
   1  -4   4    1.66    0.04
  -1   4  -4    1.61    0.04
  -1   4  -4    1.55    0.04
  -2  -4  -4    0.49    0.01
  -2  -4  -4    0.46    0.02
   2  -4   4    0.48    0.02
   2  -4   4    0.47    0.02
   2  -4   4    0.49    0.02
   2  -4   4    0.44    0.02
  -2   4  -4    0.43    0.02
   2   4   4    0.45    0.02
  -3  -4  -4    0.94    0.03
  -3  -4  -4    0.97    0.03
   3  -4   4    0.99    0.03
   3  -4   4    0.98    0.03
   3  -4   4    0.97    0.03
   3  -4   4    0.95    0.03
   3   4   4    0.93    0.03
  -3   4  -4    0.97    0.03
   4  -4   4    1.33    0.04
   4  -4   4    1.34    0.03
  -4  -4  -4    1.33    0.04
  -4  -4  -4    1.32    0.04
   4  -4   4    1.35    0.04
   4  -4   4    1.45    0.04
  -4   4  -4    1.36    0.04
   4   4   4    1.35    0.04
   5  -4   4    0.17    0.01
   5  -4   4    0.16    0.01
   5  -4   4    0.17    0.01
   5  -4   4    0.18    0.01
  -5  -4  -4    0.16    0.01
  -5  -4  -4    0.18    0.02
   5   4   4    0.16    0.01
  -5   4  -4    0.16    0.02
   6  -4   4    0.92    0.03
   6  -4   4    0.96    0.03
   6  -4   4    0.88    0.03
  -6   4  -4    0.91    0.02
   6   4   4    0.89    0.02
   6   4   4    0.94    0.03
  -6   4  -4    0.93    0.04
   7  -4   4    0.00    0.01
   7  -4   4   -0.01    0.01
   7  -4   4    0.00    0.01
  -7  -4  -4    0.01    0.01
  -7   4  -4    0.00    0.01
   7   4   4    0.00    0.01
   7   4   4    0.01    0.01
   7   4   4    0.01    0.01
  -7   4  -4    0.00    0.00
  -7   4  -4   -0.01    0.01
  -8  -4  -4    0.48    0.02
   8  -4   4    0.47    0.02
  -8   4  -4    0.46    0.02
  -8   4  -4    0.45    0.01
  -8   4  -4    0.45    0.02
   8   4   4    0.47    0.02
   9  -4   4    0.56    0.02
  -9  -4  -4    0.56    0.02
  -9   4  -4    0.59    0.02
   9   4   4    0.58    0.02
  -9   4  -4    0.55    0.01
  -9   4  -4    0.57    0.02
  10   4   4    0.20    0.01
 -10   4  -4    0.19    0.01
 -10   4  -4    0.20    0.01
  11   4   4    0.06    0.01
 -11   4  -4    0.06    0.01
 -11   4  -4    0.05    0.01
 -11  -5   4    0.02    0.01
 -11  -5   4    0.02    0.01
  11   5  -4    0.02    0.01
 -11   5   4    0.02    0.01
 -11   5   4    0.01    0.00
 -10  -5   4    0.10    0.01
 -10  -5   4    0.10    0.01
 -10   5   4    0.11    0.01
 -10   5   4    0.12    0.01
 -10   5   4    0.14    0.01
 -10   5   4    0.12    0.01
  -9  -5   4    0.02    0.01
  -9   5   4    0.02    0.01
  -9   5   4    0.02    0.01
  -9   5   4    0.02    0.01
  -9   5   4    0.01    0.01
  -9   5   4    0.02    0.01
  -8  -5   4    1.21    0.04
  -8   5   4    1.14    0.04
  -8   5   4    1.11    0.03
  -8   5   4    1.12    0.03
  -8   5   4    1.18    0.03
  -8   5   4    1.12    0.03
  -8   5   4    1.13    0.03
  -7  -5   4    5.99    0.12
  -7   5   4    5.76    0.12
  -7   5   4    5.81    0.11
  -7   5   4    5.49    0.11
  -7   5   4    5.81    0.11
  -7   5   4    5.77    0.11
  -7   5   4    5.72    0.11
   6  -5  -4    0.01    0.01
   6  -5  -4    0.00    0.01
   6  -5  -4    0.01    0.01
   6  -5  -4    0.02    0.01
  -6  -5   4    0.01    0.01
  -6   5   4    0.02    0.01
  -6   5   4    0.01    0.01
  -6   5   4    0.02    0.01
  -6   5   4    0.02    0.01
  -6   5   4    0.01    0.01
   6   5  -4    0.01    0.01
  -6   5   4    0.01    0.01
  -6   5   4    0.01    0.01
   5  -5  -4    1.17    0.04
   5  -5  -4    1.19    0.03
   5  -5  -4    1.16    0.03
   5   5  -4    1.18    0.04
  -5   5   4    1.16    0.03
   4  -5  -4    6.72    0.15
   4  -5  -4    6.92    0.14
   4  -5  -4    6.34    0.16
   4   5  -4    6.91    0.16
   3  -5  -4    0.47    0.02
   3  -5  -4    0.47    0.02
   3  -5  -4    0.47    0.01
   3  -5  -4    0.44    0.01
   3   5  -4    0.50    0.02
   2  -5  -4    4.85    0.10
  -2  -5   4    5.01    0.11
   2  -5  -4    5.05    0.11
  -2  -5   4    5.10    0.11
  -2  -5   4    5.14    0.11
   2  -5  -4    4.98    0.11
   2   5  -4    5.08    0.12
   1  -5  -4    0.23    0.01
   1  -5  -4    0.22    0.01
  -1  -5   4    0.24    0.01
  -1  -5   4    0.26    0.01
   1  -5  -4    0.22    0.01
  -1  -5   4    0.27    0.01
   1   5  -4    0.22    0.02
   0  -5   4    0.24    0.01
   0  -5  -4    0.24    0.01
   0  -5   4    0.25    0.01
   0  -5  -4    0.26    0.01
   0  -5   4    0.25    0.01
   0   5  -4    0.24    0.02
   1  -5   4    1.92    0.05
   1  -5   4    1.96    0.05
   1  -5   4    1.95    0.04
  -1  -5  -4    1.92    0.04
  -1  -5  -4    1.94    0.05
  -1   5  -4    1.86    0.05
   2  -5   4    3.15    0.07
   2  -5   4    3.10    0.07
  -2  -5  -4    3.12    0.07
   2  -5   4    3.07    0.07
  -2  -5  -4    3.07    0.07
   2  -5   4    3.07    0.08
  -2   5  -4    3.24    0.08
  -3  -5  -4    0.03    0.01
   3  -5   4    0.04    0.01
   3  -5   4    0.04    0.01
   3  -5   4    0.04    0.01
   3  -5   4    0.04    0.01
  -3  -5  -4    0.03    0.01
  -3   5  -4    0.05    0.01
  -4  -5  -4    4.81    0.11
   4  -5   4    4.82    0.11
   4  -5   4    4.85    0.11
   4  -5   4    5.02    0.11
  -4  -5  -4    5.01    0.11
   4  -5   4    4.92    0.12
  -4   5  -4    4.91    0.12
   5  -5   4    1.96    0.05
   5  -5   4    2.03    0.06
   5  -5   4    1.95    0.05
   5  -5   4    1.98    0.05
  -5  -5  -4    1.97    0.05
  -5  -5  -4    2.02    0.05
  -5   5  -4    2.01    0.06
  -5   5  -4    1.94    0.04
   5   5   4    1.93    0.04
   5   5   4    1.93    0.05
   6  -5   4    0.86    0.03
   6  -5   4    0.84    0.03
  -6   5  -4    0.85    0.02
   6   5   4    0.95    0.03
   6   5   4    0.92    0.03
   6   5   4    0.85    0.03
  -6   5  -4    0.86    0.03
  -6   5  -4    0.88    0.03
   6   5   4    0.86    0.02
  -6   5  -4    0.90    0.02
  -6   5  -4    0.84    0.03
  -6   5  -4    0.86    0.03
   7  -5   4    0.04    0.01
   7   5   4    0.04    0.01
   7   5   4    0.03    0.01
  -7   5  -4    0.03    0.01
  -7   5  -4    0.03    0.00
  -7   5  -4    0.04    0.01
  -7   5  -4    0.04    0.01
   8  -5   4    1.18    0.03
  -8  -5  -4    1.14    0.03
  -8   5  -4    1.14    0.03
  -8   5  -4    1.17    0.03
  -8   5  -4    1.09    0.03
   8   5   4    1.13    0.03
  -8   5  -4    1.13    0.03
  -9  -5  -4    0.00    0.01
  -9   5  -4    0.00    0.01
   9   5   4    0.00    0.01
  -9   5  -4    0.01    0.00
  10   5   4    0.12    0.01
 -10   5  -4    0.12    0.01
 -10   5  -4    0.14    0.01
  10   5   4    0.13    0.01
 -11   5  -4    0.00    0.00
  11   5   4    0.01    0.00
 -10   6   4    0.64    0.02
 -10   6   4    0.73    0.02
 -10   6   4    0.71    0.02
 -10   6   4    0.67    0.02
  10   6  -4    0.72    0.02
  -9   6   4    0.10    0.01
  -9   6   4    0.09    0.01
  -9   6   4    0.07    0.01
  -9   6   4    0.10    0.01
   9   6  -4    0.09    0.01
  -9   6   4    0.09    0.01
  -8  -6   4    0.44    0.02
  -8   6   4    0.46    0.02
  -8   6   4    0.44    0.02
  -8   6   4    0.44    0.02
  -8   6   4    0.44    0.02
  -8   6   4    0.44    0.02
  -7  -6   4    0.00    0.01
  -7   6   4    0.02    0.01
  -7   6   4    0.01    0.01
  -7   6   4    0.01    0.01
  -7   6   4    0.00    0.01
  -7   6   4    0.01    0.01
  -7   6   4    0.01    0.01
  -6  -6   4    2.64    0.06
  -6   6   4    2.48    0.06
  -6   6   4    2.55    0.06
  -6   6   4    2.60    0.06
  -6   6   4    2.54    0.06
  -6   6   4    2.62    0.06
  -6   6   4    2.61    0.06
   5  -6  -4    0.18    0.02
   5  -6  -4    0.18    0.01
   5  -6  -4    0.15    0.01
  -5  -6   4    0.18    0.01
  -5   6   4    0.18    0.02
  -5   6   4    0.17    0.01
  -5   6   4    0.18    0.01
  -5   6   4    0.15    0.01
  -5   6   4    0.17    0.01
  -5   6   4    0.19    0.01
   5   6  -4    0.16    0.02
  -5   6   4    0.17    0.01
   4  -6  -4    0.43    0.02
  -4  -6   4    0.37    0.02
   4  -6  -4    0.37    0.01
   4  -6  -4    0.38    0.02
   4   6  -4    0.38    0.02
   3  -6  -4    0.11    0.01
   3  -6  -4    0.09    0.01
   3  -6  -4    0.09    0.01
   3  -6  -4    0.10    0.01
   3   6  -4    0.08    0.01
   2  -6  -4    0.40    0.01
   2  -6  -4    0.41    0.01
  -2  -6   4    0.40    0.02
   2  -6  -4    0.39    0.02
  -2  -6   4    0.40    0.02
   2   6  -4    0.42    0.02
   1  -6  -4    0.24    0.02
   1  -6  -4    0.26    0.01
  -1  -6   4    0.26    0.02
   1  -6  -4    0.26    0.01
  -1  -6   4    0.26    0.02
  -1  -6   4    0.27    0.01
   1   6  -4    0.26    0.02
   0  -6   4    0.08    0.01
   0  -6  -4    0.06    0.01
   0  -6  -4    0.06    0.01
   0  -6   4    0.07    0.01
   0  -6   4    0.07    0.01
   0  -6  -4    0.08    0.01
   0   6  -4    0.07    0.01
   1  -6   4    0.43    0.02
   1  -6   4    0.41    0.02
  -1  -6  -4    0.43    0.01
   1  -6   4    0.46    0.02
  -1  -6  -4    0.41    0.02
   2  -6   4    0.37    0.02
   2  -6   4    0.36    0.02
  -2  -6  -4    0.33    0.01
   2  -6   4    0.32    0.02
   2  -6   4    0.35    0.02
  -2  -6  -4    0.37    0.01
  -3  -6  -4    1.23    0.03
   3  -6   4    1.26    0.04
   3  -6   4    1.30    0.04
  -3  -6  -4    1.21    0.03
   3  -6   4    1.27    0.03
   3  -6   4    1.27    0.04
  -3   6  -4    1.22    0.04
   4  -6   4    5.48    0.12
   4  -6   4    5.36    0.12
   4  -6   4    5.30    0.12
  -4  -6  -4    5.37    0.12
  -4  -6  -4    5.42    0.12
  -4   6  -4    5.26    0.11
   4   6   4    5.35    0.11
  -4   6  -4    5.39    0.14
   4   6   4    5.19    0.10
  -4   6  -4    5.28    0.10
  -4   6  -4    5.32    0.11
   4   6   4    5.36    0.11
  -4   6  -4    5.31    0.10
  -5  -6  -4    0.04    0.01
   5  -6   4    0.03    0.01
   5  -6   4    0.02    0.01
   5  -6   4    0.02    0.01
  -5  -6  -4    0.02    0.01
   5  -6   4    0.02    0.01
  -5   6  -4    0.04    0.01
  -5   6  -4    0.02    0.01
   5   6   4    0.08    0.01
  -5   6  -4    0.02    0.01
   5   6   4    0.03    0.00
  -5   6  -4    0.02    0.00
  -5   6  -4    0.05    0.02
  -5   6  -4    0.04    0.01
  -5   6  -4    0.04    0.01
  -5   6  -4    0.03    0.01
   5   6   4    0.03    0.01
   5   6   4    0.07    0.01
  -6   6  -4    0.69    0.02
  -6   6  -4    0.66    0.02
   6   6   4    0.73    0.02
  -6   6  -4    0.70    0.02
   6   6   4    0.71    0.03
   6   6   4    0.71    0.02
  -6   6  -4    0.73    0.03
  -6   6  -4    0.72    0.02
   6   6   4    0.69    0.03
  -6   6  -4    0.68    0.02
   7   6   4    0.27    0.02
   7   6   4    0.30    0.01
  -7   6  -4    0.28    0.02
  -7   6  -4    0.30    0.01
   7   6   4    0.31    0.02
  -7   6  -4    0.30    0.01
  -7   6  -4    0.27    0.02
  -7   6  -4    0.29    0.01
  -7   6  -4    0.31    0.02
   7   6   4    0.29    0.01
  -8  -6  -4    0.06    0.01
  -8   6  -4    0.06    0.01
  -8   6  -4    0.05    0.00
   8   6   4    0.05    0.01
   8   6   4    0.05    0.00
  -8   6  -4    0.05    0.01
  -8   6  -4    0.05    0.01
  -8   6  -4    0.05    0.01
  -9  -6  -4    0.08    0.01
   9   6   4    0.10    0.01
  -9   6  -4    0.09    0.01
  -9   6  -4    0.07    0.01
  -9   6  -4    0.08    0.01
  10   6   4    0.00    0.00
 -10   6  -4    0.00    0.00
 -10   6  -4    0.00    0.00
 -10   7   4    0.21    0.01
 -10   7   4    0.24    0.01
  -9   7   4    0.03    0.01
  -9   7   4    0.04    0.01
   9   7  -4    0.04    0.01
  -9   7   4    0.03    0.01
  -9   7   4    0.02    0.01
  -9   7   4    0.03    0.01
  -8   7   4    0.04    0.01
  -8   7   4    0.04    0.01
  -8   7   4    0.04    0.01
  -8   7   4    0.04    0.01
   8   7  -4    0.03    0.01
  -8   7   4    0.05    0.01
  -8   7   4    0.05    0.01
  -7  -7   4    0.02    0.01
  -7   7   4    0.03    0.01
   7   7  -4    0.01    0.01
  -7   7   4    0.01    0.01
  -7   7   4    0.02    0.01
  -7   7   4    0.01    0.01
  -7   7   4    0.02    0.01
  -6  -7   4    0.00    0.01
  -6   7   4    0.01    0.01
  -6   7   4    0.00    0.01
  -6   7   4    0.01    0.01
  -6   7   4    0.00    0.01
  -6   7   4   -0.01    0.01
  -6   7   4    0.00    0.01
   6   7  -4    0.00    0.01
  -6   7   4    0.00    0.01
  -5  -7   4   -0.01    0.01
   5   7  -4    0.02    0.01
  -5   7   4    0.01    0.01
  -5   7   4    0.00    0.01
  -5   7   4    0.01    0.01
  -5   7   4   -0.01    0.01
  -5   7   4    0.01    0.01
  -5   7   4    0.00    0.01
  -5   7   4    0.01    0.01
  -4  -7   4    0.06    0.01
   4   7  -4    0.06    0.01
  -4   7   4    0.06    0.01
   4   7  -4    0.04    0.01
  -4   7   4    0.02    0.01
  -4   7   4    0.04    0.01
  -4   7   4    0.03    0.01
  -4   7   4    0.02    0.01
  -4   7   4    0.04    0.01
  -4   7   4    0.04    0.01
   3  -7  -4    0.40    0.02
  -3  -7   4    0.42    0.02
   3  -7  -4    0.42    0.02
   3  -7  -4    0.41    0.02
   3  -7  -4    0.41    0.01
  -3   7   4    0.44    0.02
   3   7  -4    0.43    0.02
   3   7  -4    0.43    0.02
  -3   7   4    0.44    0.02
  -3   7   4    0.38    0.02
   3   7  -4    0.43    0.02
  -3   7   4    0.41    0.02
  -3   7   4    0.42    0.02
  -3   7   4    0.41    0.02
   3   7  -4    0.40    0.02
  -3   7   4    0.44    0.02
  -2  -7   4    0.29    0.02
   2  -7  -4    0.23    0.02
   2  -7  -4    0.28    0.01
   2  -7  -4    0.28    0.01
  -2   7   4    0.27    0.02
   2   7  -4    0.25    0.02
  -2   7   4    0.25    0.01
   2   7  -4    0.26    0.01
  -2   7   4    0.27    0.01
   2   7  -4    0.26    0.02
   2   7  -4    0.27    0.02
   2   7  -4    0.25    0.01
  -2   7   4    0.26    0.02
  -2   7   4    0.28    0.02
  -2   7   4    0.27    0.02
  -2   7   4    0.24    0.02
   1  -7  -4    0.15    0.01
  -1  -7   4    0.14    0.01
   1  -7  -4    0.13    0.01
   1  -7  -4    0.14    0.01
  -1  -7   4    0.14    0.01
  -1  -7   4    0.14    0.01
  -1   7   4    0.14    0.01
   1   7  -4    0.18    0.02
  -1   7   4    0.15    0.01
  -1   7   4    0.14    0.01
   1   7  -4    0.13    0.01
  -1   7   4    0.15    0.01
  -1   7   4    0.16    0.01
   1   7  -4    0.16    0.01
   0  -7   4    0.05    0.01
   0  -7   4    0.04    0.01
   0  -7  -4    0.03    0.01
   0  -7  -4    0.04    0.01
   0  -7   4    0.05    0.01
   0  -7  -4    0.04    0.01
   0  -7   4    0.04    0.01
   0   7   4    0.05    0.01
   0   7  -4    0.03    0.01
   0   7  -4    0.05    0.01
   1  -7   4    1.65    0.04
  -1  -7  -4    1.61    0.04
   1  -7   4    1.64    0.04
   1  -7   4    1.66    0.05
  -1  -7  -4    1.65    0.04
  -1  -7  -4    1.61    0.05
   1   7   4    1.62    0.04
   1   7   4    1.65    0.04
  -1   7  -4    1.64    0.03
  -1   7  -4    1.70    0.04
   1   7   4    1.70    0.04
  -1   7  -4    1.60    0.04
   1   7   4    1.68    0.04
  -2  -7  -4    0.20    0.01
  -2  -7  -4    0.19    0.01
   2  -7   4    0.19    0.01
  -2  -7  -4    0.17    0.01
   2  -7   4    0.21    0.02
   2  -7   4    0.18    0.01
   2  -7   4    0.18    0.01
  -2   7  -4    0.19    0.01
  -2   7  -4    0.18    0.02
  -2   7  -4    0.20    0.01
   2   7   4    0.20    0.01
  -2   7  -4    0.20    0.01
  -2   7  -4    0.19    0.01
   2   7   4    0.20    0.02
  -2   7  -4    0.21    0.02
   2   7   4    0.19    0.01
  -2   7  -4    0.19    0.01
   2   7   4    0.19    0.01
   2   7   4    0.20    0.02
  -2   7  -4    0.19    0.01
  -3  -7  -4    0.19    0.01
   3  -7   4    0.20    0.02
  -3  -7  -4    0.19    0.01
   3  -7   4    0.21    0.01
   3  -7   4    0.20    0.02
   3  -7   4    0.19    0.01
   3   7   4    0.19    0.01
   3   7   4    0.22    0.02
  -3   7  -4    0.18    0.01
   3   7   4    0.20    0.01
   3   7   4    0.22    0.02
  -3   7  -4    0.22    0.02
  -3   7  -4    0.23    0.02
   3   7   4    0.22    0.01
  -3   7  -4    0.21    0.01
  -3   7  -4    0.21    0.01
  -3   7  -4    0.22    0.01
  -3   7  -4    0.23    0.02
   4   7   4    2.11    0.05
   4   7   4    2.10    0.05
  -4   7  -4    2.22    0.05
  -4   7  -4    2.15    0.05
   4   7   4    2.19    0.05
   4   7   4    2.16    0.04
  -4   7  -4    2.13    0.05
  -4   7  -4    2.13    0.05
  -4   7  -4    2.14    0.05
  -4   7  -4    2.15    0.04
   4   7   4    2.15    0.05
  -5   7  -4    0.47    0.01
  -5   7  -4    0.44    0.02
   5   7   4    0.49    0.02
  -5   7  -4    0.49    0.02
  -5   7  -4    0.52    0.02
   5   7   4    0.48    0.01
  -5   7  -4    0.50    0.02
  -5   7  -4    0.50    0.02
  -5   7  -4    0.48    0.02
   5   7   4    0.52    0.02
  -6   7  -4    0.00    0.00
   6   7   4    0.02    0.01
  -6   7  -4   -0.01    0.01
  -6   7  -4   -0.01    0.01
  -6   7  -4   -0.03    0.01
   6   7   4    0.00    0.00
   6   7   4   -0.01    0.01
  -6   7  -4    0.01    0.01
  -6   7  -4    0.00    0.01
  -6   7  -4    0.01    0.01
   7   7   4    1.01    0.03
  -7   7  -4    1.00    0.03
  -7   7  -4    0.94    0.03
  -7   7  -4    0.98    0.03
  -7   7  -4    0.99    0.03
   7   7   4    0.97    0.02
  -7   7  -4    0.97    0.03
  -8  -7  -4    0.03    0.01
  -8   7  -4    0.04    0.01
  -8   7  -4    0.04    0.01
  -8   7  -4    0.03    0.01
   8   7   4    0.04    0.00
  -8   7  -4    0.04    0.01
  -9  -7  -4    0.53    0.01
  -9   7  -4    0.55    0.02
  -9   7  -4    0.49    0.01
  -9   7  -4    0.52    0.02
  -9   7  -4    0.52    0.02
  -9   8   4   -0.01    0.01
  -9   8   4    0.00    0.00
   9   8  -4    0.00    0.00
  -9   8   4    0.00    0.00
  -8   8   4    0.01    0.01
  -8   8   4    0.01    0.01
  -8   8   4    0.01    0.00
   8   8  -4    0.01    0.00
  -8   8   4    0.01    0.01
  -8   8   4    0.01    0.01
  -8   8   4    0.01    0.01
  -7   8   4    0.12    0.01
  -7   8   4    0.14    0.01
   7   8  -4    0.13    0.01
  -7   8   4    0.12    0.01
  -7   8   4    0.14    0.01
   7   8  -4    0.14    0.01
  -7   8   4    0.12    0.01
  -7   8   4    0.12    0.01
  -6  -8   4    0.04    0.01
  -6   8   4    0.04    0.01
  -6   8   4    0.04    0.01
  -6   8   4    0.04    0.01
  -6   8   4    0.04    0.01
   6   8  -4    0.03    0.01
  -6   8   4    0.02    0.01
  -6   8   4    0.04    0.01
  -6   8   4    0.03    0.01
   6   8  -4    0.04    0.01
  -5  -8   4    0.15    0.01
   5   8  -4    0.16    0.01
  -5   8   4    0.18    0.01
  -5   8   4    0.16    0.01
  -5   8   4    0.15    0.01
  -5   8   4    0.18    0.01
  -5   8   4    0.16    0.01
   5   8  -4    0.13    0.01
  -5   8   4    0.14    0.02
  -5   8   4    0.16    0.01
  -4  -8   4    1.31    0.04
  -4   8   4    1.25    0.03
  -4   8   4    1.28    0.04
   4   8  -4    1.30    0.04
   4   8  -4    1.26    0.03
  -4   8   4    1.24    0.03
  -4   8   4    1.32    0.04
  -4   8   4    1.31    0.04
  -4   8   4    1.27    0.04
  -4   8   4    1.28    0.03
   4   8  -4    1.29    0.03
  -3  -8   4    0.34    0.02
  -3   8   4    0.33    0.02
   3   8  -4    0.34    0.02
   3   8  -4    0.38    0.02
  -3   8   4    0.37    0.02
  -3   8   4    0.31    0.02
  -3   8   4    0.34    0.02
   3   8  -4    0.33    0.01
  -3   8   4    0.34    0.02
  -3   8   4    0.37    0.02
   3   8  -4    0.34    0.02
  -2  -8   4    3.54    0.08
  -2   8   4    3.49    0.07
  -2   8   4    3.59    0.07
   2   8  -4    3.62    0.07
  -2   8   4    3.55    0.07
  -2   8   4    3.48    0.07
   2   8  -4    3.56    0.07
   2   8  -4    3.62    0.07
   2   8  -4    3.51    0.08
  -2   8   4    3.57    0.08
  -2   8   4    3.59    0.07
  -2   8   4    3.52    0.07
   2   8  -4    3.41    0.08
  -1  -8   4    0.90    0.03
  -1   8   4    0.90    0.03
   1   8  -4    0.93    0.02
   1   8  -4    0.96    0.03
  -1   8   4    0.96    0.03
  -1   8   4    0.92    0.03
  -1   8   4    0.93    0.03
   1   8  -4    0.93    0.03
  -1   8   4    0.91    0.03
   1   8  -4    0.91    0.03
   1   8  -4    0.93    0.02
  -1   8   4    0.95    0.03
  -1   8   4    0.94    0.03
   0  -8   4    0.19    0.01
   0   8   4    0.21    0.01
   0   8   4    0.20    0.01
   0   8  -4    0.20    0.01
   0   8  -4    0.19    0.01
   0   8   4    0.22    0.02
   0   8   4    0.20    0.01
   0   8  -4    0.19    0.01
   0   8   4    0.20    0.02
   0   8  -4    0.19    0.01
   1  -8   4    0.82    0.03
   1   8   4    0.82    0.03
  -1   8  -4    0.88    0.02
  -1   8  -4    0.80    0.03
   1   8   4    0.83    0.03
  -1   8  -4    0.83    0.02
   1   8   4    0.80    0.02
  -1   8  -4    0.88    0.03
   1   8   4    0.84    0.03
   1   8   4    0.85    0.03
   1   8   4    0.83    0.02
  -1   8  -4    0.77    0.03
  -1   8  -4    0.81    0.03
  -2   8  -4    0.00    0.01
   2   8   4    0.00    0.01
  -2   8  -4    0.01    0.01
  -2   8  -4    0.01    0.01
  -2   8  -4    0.01    0.01
   2   8   4    0.00    0.01
   2   8   4    0.00    0.01
  -2   8  -4    0.00    0.01
  -2   8  -4    0.01    0.00
  -2   8  -4    0.01    0.01
   2   8   4    0.01    0.01
   2   8   4    0.00    0.01
  -3   8  -4   -0.01    0.01
   3   8   4    0.00    0.01
   3   8   4    0.00    0.01
   3   8   4    0.02    0.01
  -3   8  -4    0.00    0.01
  -3   8  -4    0.00    0.01
   3   8   4   -0.01    0.01
  -3   8  -4    0.00    0.00
  -3   8  -4    0.00    0.01
  -3   8  -4    0.00    0.01
   3   8   4    0.00    0.01
  -4   8  -4    0.01    0.01
  -4   8  -4    0.01    0.01
   4   8   4    0.01    0.01
   4   8   4    0.00    0.01
  -4   8  -4    0.02    0.00
  -4   8  -4    0.01    0.01
   4   8   4    0.01    0.01
  -4   8  -4    0.01    0.00
   4   8   4    0.01    0.01
  -4   8  -4    0.01    0.01
  -4   8  -4    0.01    0.01
  -5   8  -4    0.00    0.01
  -5   8  -4   -0.01    0.01
  -5   8  -4    0.00    0.01
  -5   8  -4    0.00    0.01
   5   8   4    0.00    0.01
   5   8   4    0.00    0.01
  -5   8  -4    0.00    0.01
  -6   8  -4    0.06    0.01
  -6   8  -4    0.06    0.01
  -6   8  -4    0.05    0.01
  -6   8  -4    0.06    0.01
  -6   8  -4    0.05    0.01
  -6   8  -4    0.06    0.01
   6   8   4    0.05    0.01
   6   8   4    0.05    0.01
  -7   8  -4    0.00    0.01
  -7   8  -4    0.00    0.01
  -7   8  -4    0.01    0.00
  -7   8  -4    0.00    0.00
   7   8   4    0.02    0.01
  -7   8  -4   -0.01    0.01
  -8  -8  -4    0.05    0.01
  -8   8  -4    0.05    0.01
  -8   8  -4    0.04    0.00
  -8   8  -4    0.04    0.01
  -8   8  -4    0.04    0.01
  -7   9   4    0.57    0.02
  -7   9   4    0.57    0.02
  -7   9   4    0.58    0.02
  -7   9   4    0.58    0.02
   7   9  -4    0.57    0.01
  -7   9   4    0.59    0.02
  -6   9   4    0.52    0.02
  -6   9   4    0.50    0.02
  -6   9   4    0.46    0.02
  -6   9   4    0.51    0.02
  -6   9   4    0.52    0.02
  -6   9   4    0.48    0.02
  -6   9   4    0.52    0.02
   6   9  -4    0.49    0.01
  -5   9   4    2.82    0.06
  -5   9   4    2.86    0.06
   5   9  -4    2.74    0.06
  -5   9   4    2.75    0.06
  -5   9   4    2.88    0.06
  -5   9   4    2.86    0.06
  -5   9   4    2.89    0.06
  -5   9   4    2.75    0.06
  -4  -9   4    0.19    0.01
  -4   9   4    0.21    0.01
  -4   9   4    0.21    0.02
  -4   9   4    0.24    0.02
  -4   9   4    0.22    0.01
  -4   9   4    0.21    0.01
  -4   9   4    0.19    0.02
   4   9  -4    0.23    0.01
  -4   9   4    0.20    0.02
  -3  -9   4    0.12    0.01
  -3   9   4    0.12    0.01
  -3   9   4    0.11    0.01
  -3   9   4    0.11    0.01
   3   9  -4    0.13    0.01
  -3   9   4    0.11    0.01
  -3   9   4    0.11    0.01
   3   9  -4    0.12    0.01
  -3   9   4    0.12    0.01
  -2  -9   4    0.05    0.01
   2   9  -4    0.05    0.01
  -2   9   4    0.05    0.01
   2   9  -4    0.06    0.01
  -2   9   4    0.04    0.01
  -2   9   4    0.06    0.01
  -2   9   4    0.06    0.01
   2   9  -4    0.06    0.01
  -2   9   4    0.07    0.01
  -2   9   4    0.05    0.01
  -2   9   4    0.06    0.01
  -1  -9   4    0.14    0.01
  -1   9   4    0.13    0.01
   1   9  -4    0.12    0.01
  -1   9   4    0.14    0.01
  -1   9   4    0.13    0.01
   1   9  -4    0.16    0.01
   1   9  -4    0.13    0.01
   1   9  -4    0.13    0.01
  -1   9   4    0.13    0.01
  -1   9   4    0.14    0.01
  -1   9   4    0.14    0.01
  -1   9   4    0.12    0.01
   0  -9   4    0.14    0.01
   0   9  -4    0.11    0.01
   0   9   4    0.12    0.01
   0   9  -4    0.13    0.01
   0   9   4    0.11    0.01
   0   9  -4    0.11    0.01
   0   9   4    0.12    0.01
   0   9   4    0.12    0.01
   0   9   4    0.12    0.01
   0   9   4    0.13    0.01
   0   9  -4    0.09    0.01
   1  -9   4    0.01    0.01
   1   9   4    0.01    0.01
   1   9   4    0.01    0.01
   1   9   4    0.01    0.01
  -1   9  -4    0.00    0.01
  -1   9  -4    0.01    0.01
  -1   9  -4    0.01    0.01
   1   9   4    0.00    0.01
   1   9   4    0.01    0.00
  -1   9  -4    0.00    0.01
  -1   9  -4    0.03    0.01
   2  -9   4    0.09    0.01
  -2   9  -4    0.09    0.01
  -2   9  -4    0.08    0.01
   2   9   4    0.10    0.01
   2   9   4    0.08    0.01
   2   9   4    0.09    0.01
   2   9   4    0.08    0.01
  -2   9  -4    0.07    0.01
  -2   9  -4    0.09    0.01
  -2   9  -4    0.09    0.01
   2   9   4    0.09    0.01
   3   9   4    0.03    0.01
  -3   9  -4    0.02    0.01
   3   9   4    0.03    0.01
  -3   9  -4    0.02    0.01
   3   9   4    0.02    0.01
  -3   9  -4    0.01    0.01
   3   9   4    0.01    0.01
   3   9   4    0.01    0.01
  -3   9  -4    0.02    0.01
  -3   9  -4    0.03    0.01
   4   9   4    0.01    0.01
   4   9   4    0.00    0.00
  -4   9  -4    0.02    0.01
  -4   9  -4    0.01    0.01
  -4   9  -4    0.00    0.01
  -4   9  -4    0.00    0.01
  -4   9  -4    0.01    0.01
   4   9   4    0.01    0.01
   4   9   4    0.01    0.01
  -5   9  -4    0.01    0.01
   5   9   4   -0.01    0.01
   5   9   4    0.00    0.01
  -5   9  -4    0.01    0.01
  -5   9  -4    0.00    0.01
  -5   9  -4    0.01    0.00
  -5   9  -4    0.00    0.01
  -6   9  -4    0.02    0.01
  -6   9  -4    0.02    0.01
   6   9   4    0.02    0.01
  -6   9  -4    0.03    0.01
  -6   9  -4    0.02    0.01
  -6   9  -4    0.02    0.00
   6   9   4    0.03    0.01
  -7  -9  -4    0.00    0.00
  -7   9  -4    0.00    0.01
  -7   9  -4    0.00    0.00
  -7   9  -4    0.01    0.00
  -6  10   4    0.29    0.01
  -6  10   4    0.29    0.01
  -6  10   4    0.29    0.01
  -6  10   4    0.31    0.01
  -5  10   4    0.15    0.01
  -5  10   4    0.14    0.01
  -5  10   4    0.14    0.01
  -5  10   4    0.16    0.01
  -5  10   4    0.13    0.01
  -5  10   4    0.13    0.01
  -4  10   4    0.11    0.01
  -4  10   4    0.09    0.01
  -4  10   4    0.09    0.01
  -4  10   4    0.10    0.01
  -4  10   4    0.10    0.01
  -4  10   4    0.10    0.01
  -3  10   4    0.07    0.01
  -3  10   4    0.07    0.01
  -3  10   4    0.08    0.01
  -3  10   4    0.08    0.01
  -3  10   4    0.08    0.01
  -3  10   4    0.07    0.01
  -2 -10   4    0.03    0.01
  -2  10   4    0.01    0.01
  -2  10   4    0.02    0.01
   2  10  -4    0.03    0.01
  -2  10   4    0.04    0.01
  -2  10   4    0.03    0.01
  -2  10   4    0.02    0.01
  -2  10   4    0.03    0.01
  -2  10   4    0.04    0.01
  -1 -10   4    0.02    0.01
  -1  10   4    0.01    0.01
  -1  10   4    0.01    0.01
  -1  10   4    0.01    0.01
  -1  10   4    0.01    0.00
  -1  10   4    0.02    0.01
   1  10  -4    0.02    0.01
   1  10  -4    0.02    0.01
   0 -10   4    0.06    0.01
   0  10   4    0.06    0.01
   0  10   4    0.05    0.01
   0  10   4    0.07    0.01
   0  10   4    0.07    0.01
   0  10   4    0.07    0.01
   0  10  -4    0.05    0.01
   0  10  -4    0.06    0.01
   1 -10   4    0.16    0.01
  -1  10  -4    0.18    0.01
   1  10   4    0.18    0.01
  -1  10  -4    0.15    0.01
  -1  10  -4    0.17    0.01
  -1  10  -4    0.16    0.01
   1  10   4    0.17    0.01
   1  10   4    0.17    0.01
   1  10   4    0.19    0.01
  -1  10  -4    0.16    0.01
   1  10   4    0.17    0.01
   2 -10   4    0.17    0.01
  -2  10  -4    0.17    0.01
  -2  10  -4    0.17    0.01
   2  10   4    0.18    0.01
  -2  10  -4    0.17    0.01
   2  10   4    0.19    0.01
  -2  10  -4    0.18    0.01
   2  10   4    0.17    0.01
   2  10   4    0.17    0.01
   2  10   4    0.17    0.01
  -2  10  -4    0.18    0.01
   3 -10   4    0.04    0.01
  -3  10  -4    0.05    0.01
   3  10   4    0.05    0.01
  -3  10  -4    0.05    0.01
   3  10   4    0.04    0.01
   3  10   4    0.04    0.01
  -3  10  -4    0.04    0.01
   3  10   4    0.06    0.01
  -3  10  -4    0.05    0.01
   4 -10   4    0.17    0.01
   4  10   4    0.19    0.01
   4  10   4    0.14    0.01
  -4  10  -4    0.17    0.01
  -4  10  -4    0.16    0.01
  -4  10  -4    0.16    0.01
   4  10   4    0.16    0.01
  -4  10  -4    0.16    0.01
   5 -10   4    0.05    0.01
   5  10   4    0.05    0.01
  -5  10  -4    0.04    0.01
  -5  10  -4    0.04    0.01
  -5  10  -4    0.06    0.01
  -5  10  -4    0.04    0.01
   5  10   4    0.05    0.01
  -6  10  -4    0.01    0.00
  -6  10  -4    0.02    0.00
  -3  11   4    0.03    0.00
  -3  11   4    0.02    0.00
  -3  11   4    0.03    0.01
  -3  11   4    0.03    0.01
  -2  11   4    0.04    0.00
  -2  11   4    0.03    0.01
  -2  11   4    0.04    0.00
  -2  11   4    0.03    0.01
  -2  11   4    0.05    0.01
  -1  11   4    0.05    0.01
  -1  11   4    0.05    0.01
  -1  11   4    0.04    0.00
  -1  11   4    0.06    0.01
  -1  11   4    0.05    0.01
   0 -11   4    0.00    0.00
   0  11   4    0.00    0.01
   0  11   4    0.00    0.00
   0  11  -4   -0.01    0.00
   0  11   4    0.02    0.01
   0  11   4    0.00    0.01
   0  11   4    0.00    0.00
   1 -11   4    0.00    0.00
   1  11   4    0.01    0.00
   1  11   4    0.00    0.00
   1  11   4    0.00    0.00
  -1  11  -4    0.00    0.01
   1  11   4    0.01    0.00
   1  11   4    0.01    0.00
  -1  11  -4    0.00    0.00
   2 -11   4    0.00    0.00
   2  11   4    0.00    0.00
   2  11   4    0.01    0.01
   2  11   4    0.00    0.00
  -2  11  -4    0.00    0.00
  -2  11  -4    0.01    0.01
   2  11   4    0.00    0.00
  -2  11  -4    0.01    0.01
 -12   0   5   -0.01    0.00
  12   0  -5    0.01    0.01
 -12   0   5    0.00    0.00
 -11   0   5    0.06    0.01
 -11   0   5    0.06    0.01
 -11   0   5    0.06    0.01
  11   0  -5    0.05    0.01
 -11   0   5    0.06    0.00
 -10   0   5    0.00    0.00
 -10   0   5    0.00    0.01
 -10   0   5    0.00    0.01
 -10   0   5    0.00    0.01
  10   0  -5    0.00    0.01
  -9   0   5    7.19    0.14
  -9   0   5    7.41    0.13
   9   0  -5    7.21    0.14
  -9   0   5    7.20    0.15
  -9   0   5    7.28    0.14
  -8   0   5   -0.01    0.01
  -8   0   5    0.00    0.01
   8   0  -5    0.01    0.01
  -8   0   5    0.00    0.01
  -8   0   5    0.00    0.01
   8   0  -5    0.01    0.01
   7   0  -5    1.84    0.05
   7   0  -5    1.83    0.05
   7   0  -5    1.91    0.05
   7   0  -5    1.85    0.06
   6   0  -5    0.02    0.01
   6   0  -5    0.02    0.01
   6   0  -5    0.00    0.01
   5   0  -5   13.18    0.29
   5   0  -5   12.95    0.30
   5   0  -5   12.69    0.27
   5   0  -5   13.05    0.28
   4   0  -5    0.01    0.01
   4   0  -5    0.00    0.01
   4   0  -5    0.00    0.00
   4   0  -5    0.00    0.01
   3   0  -5    3.82    0.08
   3   0  -5    3.52    0.08
   3   0  -5    3.85    0.09
   3   0  -5    3.88    0.08
   2   0  -5    0.00    0.00
   2   0  -5    0.00    0.00
   2   0  -5   -0.01    0.00
   2   0  -5   -0.01    0.01
   1   0  -5    1.04    0.02
   1   0  -5    1.00    0.02
   1   0  -5    1.03    0.03
   1   0  -5    1.01    0.03
  -1   0   5    0.96    0.02
   0   0  -5    0.01    0.00
   0   0  -5   -0.01    0.00
   1   0   5    9.02    0.20
  -1   0  -5    8.80    0.18
  -1   0  -5    9.03    0.19
  -1   0  -5    9.18    0.21
   1   0   5    9.06    0.19
   2   0   5    0.00    0.01
  -2   0  -5    0.00    0.00
  -2   0  -5    0.00    0.01
  -2   0  -5    0.00    0.01
   2   0   5    0.00    0.00
  -3   0  -5    6.10    0.15
  -3   0  -5    6.27    0.13
   3   0   5    6.11    0.14
   3   0   5    6.43    0.13
  -3   0  -5    6.23    0.14
   4   0   5    0.00    0.01
   4   0   5   -0.01    0.01
  -4   0  -5    0.00    0.01
  -4   0  -5    0.00    0.01
  -4   0  -5    0.00    0.01
  -5   0  -5    0.02    0.01
   5   0   5    0.01    0.01
   5   0   5    0.01    0.01
  -6   0  -5    0.01    0.01
   6   0   5    0.00    0.01
   6   0   5    0.00    0.01
   7   0   5    1.81    0.05
   7   0   5    1.81    0.05
  -8   0  -5    0.00    0.00
   8   0   5    0.01    0.01
   8   0   5    0.00    0.01
   9   0   5    1.64    0.04
 -11   0  -5    0.00    0.01
 -11   0  -5    0.00    0.01
 -12   0  -5    0.00    0.00
  12  -1  -5    1.69    0.04
 -12  -1   5    1.59    0.04
 -12   1   5    1.58    0.03
  12   1  -5    1.68    0.03
 -12   1   5    1.67    0.04
 -11  -1   5    0.26    0.02
  11  -1  -5    0.27    0.01
 -11  -1   5    0.26    0.01
 -11  -1   5    0.27    0.01
 -11  -1   5    0.27    0.01
 -11   1   5    0.25    0.01
  11   1  -5    0.28    0.01
 -11   1   5    0.27    0.01
  10  -1  -5    0.12    0.01
 -10  -1   5    0.13    0.01
 -10  -1   5    0.12    0.01
 -10  -1   5    0.13    0.01
 -10  -1   5    0.12    0.01
 -10   1   5    0.11    0.01
  10   1  -5    0.12    0.01
 -10   1   5    0.13    0.01
 -10   1   5    0.13    0.01
 -10   1   5    0.11    0.01
  -9  -1   5    1.03    0.03
  -9  -1   5    1.06    0.03
  -9  -1   5    1.04    0.03
  -9   1   5    1.04    0.03
  -9   1   5    1.08    0.03
   9   1  -5    1.04    0.03
  -9   1   5    1.02    0.02
  -9   1   5    1.02    0.03
   8  -1  -5    0.19    0.02
  -8  -1   5    0.18    0.01
   8  -1  -5    0.15    0.02
   8  -1  -5    0.16    0.01
   8  -1  -5    0.17    0.01
  -8  -1   5    0.17    0.01
  -8   1   5    0.18    0.01
  -8   1   5    0.16    0.01
  -8   1   5    0.16    0.01
  -8   1   5    0.17    0.01
   8   1  -5    0.18    0.02
   8   1  -5    0.18    0.01
  -8   1   5    0.20    0.02
   7  -1  -5    0.29    0.02
   7  -1  -5    0.29    0.01
   7  -1  -5    0.31    0.02
   7  -1  -5    0.28    0.02
   7   1  -5    0.27    0.01
   7   1  -5    0.30    0.02
   7   1  -5    0.27    0.02
   6  -1  -5    0.00    0.01
   6  -1  -5    0.00    0.01
   6  -1  -5    0.00    0.01
   6  -1  -5    0.02    0.01
   6   1  -5    0.00    0.00
   6   1  -5    0.02    0.01
   6   1  -5    0.01    0.01
   6   1  -5   -0.01    0.01
   5  -1  -5    0.07    0.01
   5  -1  -5    0.07    0.01
   5  -1  -5    0.07    0.01
   5  -1  -5    0.06    0.01
   5   1  -5    0.06    0.01
   5   1  -5    0.05    0.01
   5   1  -5    0.07    0.01
   5   1  -5    0.05    0.01
   4  -1  -5    0.22    0.01
   4  -1  -5    0.26    0.01
   4  -1  -5    0.24    0.01
   4  -1  -5    0.23    0.01
   4   1  -5    0.21    0.01
   4   1  -5    0.23    0.02
   4   1  -5    0.24    0.01
   4   1  -5    0.24    0.01
   3  -1  -5    3.63    0.08
   3  -1  -5    3.58    0.08
   3  -1  -5    3.33    0.08
   3  -1  -5    3.43    0.07
   3   1  -5    3.40    0.07
   3   1  -5    3.26    0.08
   3   1  -5    3.64    0.08
   3   1  -5    3.42    0.08
   2  -1  -5    1.56    0.04
   2  -1  -5    1.62    0.03
   2  -1  -5    1.46    0.03
   2  -1  -5    1.54    0.04
   2   1  -5    1.49    0.03
   2   1  -5    1.52    0.04
   2   1  -5    1.58    0.04
   2   1  -5    1.52    0.04
   2   1  -5    1.52    0.03
   1  -1  -5   16.86    0.38
   1  -1  -5   16.41    0.35
  -1  -1   5   16.21    0.34
   1  -1  -5   17.15    0.35
   1   1  -5   16.46    0.35
   1   1  -5   16.66    0.38
   1   1  -5   16.44    0.34
   1   1  -5   16.17    0.38
   0  -1   5    6.48    0.14
   0  -1  -5    6.71    0.14
   0  -1  -5    6.71    0.15
   0   1  -5    6.50    0.15
   0   1  -5    6.65    0.15
   0   1  -5    6.58    0.13
   0   1   5    6.39    0.14
   0   1  -5    6.43    0.14
   1  -1   5    4.80    0.11
  -1  -1  -5    5.02    0.11
  -1  -1  -5    4.89    0.10
   1  -1   5    4.77    0.10
  -1  -1  -5    5.05    0.10
  -1   1  -5    4.72    0.10
  -1   1  -5    4.99    0.11
  -1   1  -5    5.06    0.12
  -1   1  -5    4.76    0.11
   1   1   5    4.82    0.10
   1   1   5    4.93    0.11
  -2  -1  -5    9.70    0.21
   2  -1   5    9.76    0.21
  -2  -1  -5   10.17    0.23
   2  -1   5   10.10    0.21
   2  -1   5    9.62    0.20
  -2  -1  -5   10.22    0.20
   2  -1   5    9.92    0.22
   2   1   5   10.02    0.21
  -2   1  -5   10.59    0.23
   2   1   5   10.02    0.22
  -2   1  -5    9.80    0.20
  -2   1  -5    9.99    0.21
  -3  -1  -5    6.98    0.15
   3  -1   5    6.67    0.14
   3  -1   5    6.89    0.15
  -3  -1  -5    6.96    0.14
   3  -1   5    7.10    0.15
  -3  -1  -5    6.81    0.16
   3   1   5    7.01    0.15
  -3   1  -5    6.75    0.15
  -3   1  -5    7.31    0.16
   3   1   5    6.96    0.15
  -3   1  -5    6.89    0.14
  -4  -1  -5    2.76    0.07
  -4  -1  -5    2.94    0.07
   4  -1   5    3.03    0.07
  -4  -1  -5    2.89    0.07
   4  -1   5    2.90    0.07
   4   1   5    3.01    0.07
  -4   1  -5    2.99    0.07
   4   1   5    3.00    0.07
   5  -1   5    3.61    0.09
   5  -1   5    3.68    0.08
  -5  -1  -5    3.68    0.08
   5   1   5    3.66    0.08
   5   1   5    3.74    0.09
  -5   1  -5    3.70    0.09
   6  -1   5    1.52    0.04
   6  -1   5    1.52    0.04
  -6   1  -5    1.51    0.05
   6   1   5    1.47    0.04
   6   1   5    1.58    0.04
   7  -1   5    0.36    0.02
   7  -1   5    0.34    0.02
  -7  -1  -5    0.36    0.01
   7  -1   5    0.36    0.02
   7   1   5    0.37    0.02
   7   1   5    0.38    0.02
  -7   1  -5    0.38    0.02
  -8  -1  -5    2.92    0.06
   8  -1   5    2.86    0.07
   8  -1   5    2.90    0.06
   8   1   5    2.82    0.06
   8   1   5    2.79    0.07
   9  -1   5    0.11    0.01
 -10   1  -5    0.06    0.01
 -11  -1  -5    0.02    0.01
 -11   1  -5    0.02    0.01
 -12  -1  -5    0.00    0.00
 -12   1  -5    0.00    0.00
 -12   1  -5    0.00    0.00
 -12  -2   5    0.51    0.02
 -12  -2   5    0.54    0.02
 -12  -2   5    0.56    0.01
 -12  -2   5    0.52    0.02
  12  -2  -5    0.54    0.02
 -12   2   5    0.53    0.02
 -11  -2   5    0.00    0.01
 -11  -2   5    0.00    0.00
  11  -2  -5    0.00    0.01
 -11  -2   5    0.00    0.01
 -11  -2   5    0.00    0.00
  11   2  -5    0.01    0.01
 -11   2   5    0.01    0.01
 -11   2   5    0.00    0.01
 -10  -2   5    0.25    0.02
 -10  -2   5    0.23    0.01
 -10  -2   5    0.22    0.01
 -10   2   5    0.24    0.01
  10   2  -5    0.24    0.01
 -10   2   5    0.25    0.01
  -9  -2   5    0.02    0.01
  -9  -2   5    0.03    0.01
  -9   2   5    0.02    0.00
  -9   2   5    0.02    0.01
  -9   2   5    0.03    0.01
  -9   2   5    0.02    0.01
   9   2  -5    0.02    0.01
  -9   2   5    0.04    0.01
   8  -2  -5    0.96    0.03
   8  -2  -5    0.98    0.03
   8  -2  -5    0.95    0.04
   8  -2  -5    0.94    0.03
  -8  -2   5    1.05    0.03
  -8  -2   5    0.99    0.03
  -8   2   5    0.96    0.03
  -8   2   5    0.97    0.02
   8   2  -5    0.99    0.04
   8   2  -5    0.94    0.03
  -8   2   5    0.98    0.03
  -8   2   5    0.96    0.03
  -8   2   5    0.97    0.03
  -8   2   5    1.02    0.03
   7  -2  -5    0.04    0.01
   7  -2  -5    0.07    0.01
   7  -2  -5    0.03    0.01
   7  -2  -5    0.05    0.01
   7   2  -5    0.03    0.01
   6  -2  -5    0.99    0.03
   6  -2  -5    1.00    0.03
   6  -2  -5    1.00    0.03
   6  -2  -5    0.99    0.03
   6   2  -5    0.98    0.03
   6   2  -5    0.96    0.03
   5  -2  -5    0.63    0.03
   5  -2  -5    0.65    0.02
   5  -2  -5    0.69    0.02
   5  -2  -5    0.67    0.02
   5   2  -5    0.65    0.02
   5   2  -5    0.63    0.02
   5   2  -5    0.63    0.02
   5   2  -5    0.65    0.02
   5   2  -5    0.65    0.02
   4  -2  -5    2.52    0.05
   4  -2  -5    2.63    0.06
   4  -2  -5    2.63    0.07
   4  -2  -5    2.62    0.06
   4   2  -5    2.53    0.07
   4   2  -5    2.56    0.06
   4   2  -5    2.54    0.06
   4   2  -5    2.54    0.06
   4   2  -5    2.41    0.06
  -2  -2   5    4.16    0.09
   2  -2  -5    4.18    0.09
   2   2  -5    4.23    0.09
   2   2  -5    4.03    0.09
   2   2  -5    4.21    0.09
   2   2  -5    4.27    0.10
   2   2  -5    4.12    0.10
  -1  -2   5   13.03    0.28
  -1  -2   5   13.72    0.28
  -1  -2   5   13.07    0.27
   1   2  -5   13.45    0.27
   1   2  -5   13.21    0.31
   1   2  -5   13.50    0.31
   1   2  -5   13.80    0.28
   0  -2  -5    2.93    0.06
   0  -2  -5    2.89    0.07
   0  -2   5    2.84    0.06
   0  -2  -5    2.80    0.06
   0  -2   5    2.91    0.06
   0  -2   5    2.85    0.06
   0   2  -5    2.86    0.06
   0   2  -5    2.78    0.07
   0   2  -5    3.01    0.07
   0   2  -5    2.99    0.06
  -1  -2  -5    1.15    0.03
   1  -2   5    1.22    0.03
   1  -2   5    1.19    0.03
   1  -2   5    1.15    0.03
   1  -2   5    1.19    0.03
  -1  -2  -5    1.26    0.03
  -1  -2  -5    1.25    0.03
  -1   2  -5    1.15    0.03
  -1   2  -5    1.17    0.03
   1   2   5    1.19    0.03
  -1   2  -5    1.24    0.03
  -1   2  -5    1.17    0.03
  -2  -2  -5   12.52    0.26
   2  -2   5   12.30    0.26
   2  -2   5   12.28    0.27
   2  -2   5   12.32    0.26
  -2  -2  -5   13.00    0.25
  -2  -2  -5   11.71    0.28
   2  -2   5   12.34    0.25
  -2   2  -5   12.42    0.29
   2   2   5   12.31    0.27
  -2   2  -5   11.90    0.25
   3  -2   5    4.16    0.09
   3  -2   5    4.08    0.09
  -3  -2  -5    4.08    0.09
   3  -2   5    3.95    0.09
  -3  -2  -5    4.04    0.09
   3  -2   5    4.03    0.09
   3   2   5    4.15    0.09
  -3   2  -5    4.21    0.10
   3   2   5    4.03    0.09
  -4  -2  -5    8.84    0.19
   4  -2   5    8.75    0.18
  -4  -2  -5    8.66    0.18
   4  -2   5    9.02    0.19
   4  -2   5    8.84    0.20
   4   2   5    9.08    0.19
  -4   2  -5    8.93    0.21
   4   2   5    8.89    0.20
   5  -2   5    9.11    0.21
   5  -2   5    9.06    0.20
  -5  -2  -5    9.10    0.20
  -5  -2  -5    9.32    0.19
  -5   2  -5    9.12    0.22
   5   2   5    9.36    0.21
   6  -2   5    6.45    0.14
   6  -2   5    6.53    0.15
   6   2   5    6.48    0.15
  -6   2  -5    6.26    0.16
   7  -2   5    0.64    0.02
   7  -2   5    0.63    0.03
  -7  -2  -5    0.62    0.02
   7  -2   5    0.65    0.02
  -7   2  -5    0.64    0.03
   7   2   5    0.64    0.02
   8  -2   5    0.23    0.02
  -8  -2  -5    0.21    0.01
  -8   2  -5    0.22    0.02
   9  -2   5    0.45    0.02
  -9  -2  -5    0.42    0.01
  -9   2  -5    0.45    0.02
 -10   2  -5    0.25    0.01
 -11   2  -5    0.01    0.00
 -11   2  -5    0.01    0.01
  11   2   5    0.00    0.01
 -11   2  -5    0.01    0.00
 -12   2  -5    0.00    0.00
 -12   2  -5    0.00    0.00
 -12  -3   5    0.37    0.01
 -12  -3   5    0.42    0.01
 -12   3   5    0.38    0.01
 -11  -3   5    0.01    0.01
  11  -3  -5    0.02    0.01
 -11  -3   5    0.01    0.00
 -11  -3   5    0.01    0.01
 -11  -3   5    0.03    0.01
 -11   3   5    0.02    0.01
 -11   3   5    0.01    0.01
 -10  -3   5    0.06    0.01
 -10  -3   5    0.05    0.01
 -10   3   5    0.06    0.01
 -10   3   5    0.05    0.01
  10   3  -5    0.05    0.01
 -10   3   5    0.06    0.01
 -10   3   5    0.05    0.01
  -9  -3   5    0.53    0.02
  -9  -3   5    0.51    0.02
   9   3  -5    0.49    0.02
  -9   3   5    0.51    0.02
  -9   3   5    0.57    0.02
  -9   3   5    0.50    0.02
  -9   3   5    0.51    0.02
  -8  -3   5    0.03    0.01
  -8   3   5    0.04    0.01
   8   3  -5    0.06    0.01
  -8   3   5    0.03    0.01
  -8   3   5    0.03    0.01
  -8   3   5    0.05    0.01
  -8   3   5    0.03    0.01
  -8   3   5    0.03    0.01
   7  -3  -5    0.03    0.01
   7  -3  -5    0.04    0.01
   7  -3  -5    0.03    0.01
  -7  -3   5    0.03    0.01
   7  -3  -5    0.02    0.01
  -7   3   5    0.01    0.01
  -7   3   5    0.02    0.01
  -7   3   5    0.03    0.01
   7   3  -5    0.03    0.01
  -7   3   5    0.08    0.01
   7   3  -5    0.04    0.01
   6  -3  -5    1.58    0.05
   6  -3  -5    1.63    0.05
   6  -3  -5    1.60    0.04
   6  -3  -5    1.60    0.04
   6   3  -5    1.60    0.05
   5  -3  -5    1.11    0.03
   5  -3  -5    1.15    0.03
   5  -3  -5    1.17    0.04
   5  -3  -5    1.12    0.03
   5   3  -5    1.08    0.03
   4  -3  -5    3.00    0.08
   4  -3  -5    3.08    0.06
   4  -3  -5    3.08    0.07
   4  -3  -5    3.02    0.07
   4   3  -5    2.93    0.08
   4   3  -5    2.79    0.07
   3  -3  -5    5.24    0.12
   3  -3  -5    5.17    0.11
   3  -3  -5    4.82    0.11
   3   3  -5    4.94    0.11
   3   3  -5    5.01    0.12
   3   3  -5    5.11    0.12
  -2  -3   5    0.01    0.00
   2   3  -5    0.01    0.01
   2   3  -5    0.00    0.01
  -1  -3   5    7.79    0.16
  -1  -3   5    7.92    0.17
  -1  -3   5    7.86    0.17
   1   3  -5    8.02    0.18
   1   3  -5    7.95    0.19
   0  -3  -5    4.18    0.11
   0  -3  -5    4.17    0.09
   0  -3  -5    4.59    0.10
   0  -3   5    4.66    0.10
   0  -3   5    4.65    0.09
   0  -3   5    4.61    0.10
   0   3  -5    4.52    0.11
   0   3  -5    4.59    0.11
  -1  -3  -5    2.99    0.06
   1  -3   5    2.89    0.07
  -1  -3  -5    3.06    0.07
   1  -3   5    2.95    0.07
   1  -3   5    3.00    0.06
   1  -3   5    3.04    0.07
  -1   3  -5    3.00    0.07
  -1   3  -5    2.94    0.07
  -2  -3  -5   23.62    0.49
   2  -3   5   23.52    0.48
   2  -3   5   24.26    0.50
  -2  -3  -5   24.23    0.50
   2  -3   5   23.59    0.50
   2  -3   5   24.03    0.52
   2   3   5   23.97    0.52
  -2   3  -5   24.05    0.55
   3  -3   5    0.85    0.03
  -3  -3  -5    0.85    0.03
  -3  -3  -5    0.87    0.02
   3  -3   5    0.89    0.03
   3  -3   5    0.87    0.02
   3  -3   5    0.89    0.03
  -3   3  -5    0.88    0.03
   3   3   5    0.88    0.03
   4  -3   5    0.41    0.02
   4  -3   5    0.42    0.02
  -4  -3  -5    0.39    0.02
   4  -3   5    0.39    0.02
  -4  -3  -5    0.40    0.02
   4  -3   5    0.41    0.02
   4   3   5    0.38    0.02
  -4   3  -5    0.43    0.02
   5  -3   5    0.41    0.02
  -5  -3  -5    0.48    0.02
   5  -3   5    0.41    0.02
  -5  -3  -5    0.42    0.02
  -5   3  -5    0.39    0.02
   5   3   5    0.47    0.02
   6  -3   5    0.76    0.03
   6  -3   5    0.72    0.03
  -6   3  -5    0.77    0.03
   6   3   5    0.79    0.03
  -7  -3  -5    0.01    0.01
   7  -3   5    0.01    0.01
   7  -3   5    0.00    0.01
   7  -3   5    0.02    0.01
   7   3   5    0.01    0.01
   7   3   5    0.02    0.01
  -7   3  -5    0.00    0.01
   7   3   5    0.06    0.01
  -7   3  -5    0.00    0.01
   8  -3   5    0.10    0.01
  -8  -3  -5    0.10    0.01
   8   3   5    0.10    0.01
  -8   3  -5    0.09    0.01
  -9  -3  -5    0.09    0.01
   9  -3   5    0.09    0.01
   9   3   5    0.10    0.01
  -9   3  -5    0.08    0.01
 -10   3  -5    0.11    0.01
 -10   3  -5    0.13    0.01
  10   3   5    0.12    0.01
 -10   3  -5    0.12    0.01
  11   3   5    0.08    0.01
 -11   3  -5    0.06    0.01
 -11   3  -5    0.06    0.00
 -11  -4   5    0.01    0.01
 -11  -4   5    0.00    0.00
 -11  -4   5    0.00    0.01
 -11   4   5    0.00    0.00
 -11   4   5    0.00    0.01
 -11   4   5    0.00    0.00
 -10  -4   5    1.81    0.05
 -10  -4   5    1.89    0.04
 -10   4   5    1.87    0.04
 -10   4   5    1.88    0.04
 -10   4   5    1.85    0.04
  -9  -4   5    0.05    0.01
  -9   4   5    0.05    0.01
   9   4  -5    0.06    0.01
  -9   4   5    0.07    0.01
  -9   4   5    0.05    0.01
  -9   4   5    0.05    0.01
  -9   4   5    0.07    0.01
  -9   4   5    0.05    0.01
  -8  -4   5    1.94    0.05
  -8   4   5    1.92    0.05
  -8   4   5    2.09    0.05
  -8   4   5    1.90    0.04
   8   4  -5    1.97    0.04
  -8   4   5    1.99    0.05
  -8   4   5    1.92    0.04
  -8   4   5    1.93    0.05
  -7  -4   5    0.00    0.01
   7  -4  -5    0.04    0.01
   7  -4  -5    0.02    0.01
   7  -4  -5    0.02    0.01
   7  -4  -5    0.02    0.01
   7   4  -5    0.01    0.01
  -7   4   5    0.01    0.01
   7   4  -5    0.01    0.01
  -7   4   5    0.01    0.01
  -7   4   5    0.01    0.01
  -7   4   5    0.03    0.01
  -7   4   5    0.01    0.01
  -7   4   5    0.02    0.01
   6  -4  -5    1.30    0.03
   6  -4  -5    1.25    0.04
   6  -4  -5    1.28    0.04
   6  -4  -5    1.27    0.03
   6   4  -5    1.27    0.04
   6   4  -5    1.26    0.03
  -6   4   5    1.26    0.03
   5  -4  -5    3.42    0.08
   5  -4  -5    3.57    0.09
   5  -4  -5    3.41    0.09
   5  -4  -5    3.52    0.07
   5   4  -5    3.45    0.09
   4  -4  -5   15.40    0.34
   4  -4  -5   15.19    0.31
   4  -4  -5   15.49    0.32
   4   4  -5   15.10    0.35
   3  -4  -5    0.08    0.01
   3  -4  -5    0.09    0.01
   3  -4  -5    0.08    0.01
   3   4  -5    0.06    0.01
   2  -4  -5    1.49    0.04
   2  -4  -5    1.53    0.03
  -2  -4   5    1.48    0.04
   2   4  -5    1.53    0.04
  -1  -4   5   13.49    0.29
  -1  -4   5   13.61    0.29
  -1  -4   5   13.70    0.28
   1  -4  -5   13.57    0.28
   1   4  -5   13.89    0.31
   1   4  -5   13.49    0.32
   0  -4  -5    0.58    0.02
   0  -4   5    0.56    0.02
   0  -4   5    0.59    0.02
   0  -4   5    0.58    0.02
   0   4  -5    0.56    0.02
   0   4  -5    0.56    0.02
  -1  -4  -5    5.55    0.12
  -1  -4  -5    5.65    0.11
   1  -4   5    5.40    0.12
   1  -4   5    5.48    0.12
   1  -4   5    5.48    0.12
  -1   4  -5    5.50    0.13
  -1   4  -5    5.51    0.13
   2  -4   5    0.68    0.02
  -2  -4  -5    0.70    0.02
  -2  -4  -5    0.65    0.02
   2  -4   5    0.67    0.02
   2  -4   5    0.69    0.02
   2  -4   5    0.69    0.02
  -2   4  -5    0.68    0.02
   3  -4   5    0.00    0.01
   3  -4   5    0.01    0.01
   3  -4   5    0.00    0.01
  -3  -4  -5   -0.01    0.01
  -3  -4  -5    0.00    0.01
   3  -4   5    0.00    0.01
  -3   4  -5    0.01    0.01
   3   4   5    0.01    0.01
   4  -4   5    0.30    0.02
  -4  -4  -5    0.29    0.01
  -4  -4  -5    0.31    0.02
   4  -4   5    0.28    0.02
   4  -4   5    0.29    0.02
   4  -4   5    0.27    0.01
  -4   4  -5    0.30    0.02
   4   4   5    0.31    0.02
  -5  -4  -5    0.41    0.02
  -5  -4  -5    0.40    0.02
   5  -4   5    0.38    0.02
   5  -4   5    0.38    0.02
   5  -4   5    0.41    0.02
  -5   4  -5    0.40    0.02
   5   4   5    0.39    0.02
   6  -4   5    0.13    0.01
   6  -4   5    0.12    0.01
   6  -4   5    0.12    0.01
  -6   4  -5    0.12    0.01
   6   4   5    0.11    0.01
   6   4   5    0.12    0.01
  -6   4  -5    0.11    0.01
  -7  -4  -5    0.13    0.01
   7  -4   5    0.11    0.01
  -7   4  -5    0.10    0.01
   7   4   5    0.11    0.01
  -7   4  -5    0.11    0.02
   7   4   5    0.10    0.01
  -7   4  -5    0.11    0.01
  -8  -4  -5    0.19    0.01
   8  -4   5    0.16    0.01
   8   4   5    0.17    0.01
  -8   4  -5    0.16    0.01
  -8   4  -5    0.15    0.01
  -9  -4  -5    0.00    0.01
   9  -4   5    0.00    0.01
   9   4   5    0.00    0.01
  -9   4  -5    0.00    0.01
  -9   4  -5    0.00    0.00
  -9   4  -5    0.00    0.01
  10   4   5    0.02    0.01
 -10   4  -5    0.00    0.01
 -10   4  -5    0.00    0.00
  11   4   5    0.14    0.01
 -11   4  -5    0.14    0.01
 -11   4  -5    0.13    0.01
  11   4   5    0.14    0.01
 -11  -5   5    1.53    0.03
 -11  -5   5    1.45    0.03
 -11   5   5    1.49    0.03
 -11   5   5    1.52    0.03
 -11   5   5    1.52    0.03
 -10  -5   5    3.42    0.07
 -10  -5   5    3.53    0.08
 -10   5   5    3.52    0.07
 -10   5   5    3.63    0.07
 -10   5   5    3.43    0.07
 -10   5   5    3.63    0.07
  -9  -5   5    6.36    0.13
  -9   5   5    6.13    0.12
  -9   5   5    6.19    0.12
  -9   5   5    5.95    0.12
  -9   5   5    6.14    0.12
  -9   5   5    6.43    0.13
  -8  -5   5    0.12    0.01
  -8   5   5    0.13    0.01
  -8   5   5    0.14    0.01
  -8   5   5    0.14    0.01
  -8   5   5    0.14    0.01
  -8   5   5    0.12    0.01
  -8   5   5    0.15    0.01
  -7  -5   5    0.35    0.02
  -7   5   5    0.40    0.02
  -7   5   5    0.37    0.02
  -7   5   5    0.44    0.02
  -7   5   5    0.36    0.02
  -7   5   5    0.43    0.02
  -7   5   5    0.43    0.02
  -7   5   5    0.38    0.02
   6  -5  -5    0.00    0.01
   6  -5  -5    0.02    0.01
   6  -5  -5    0.02    0.01
  -6  -5   5    0.01    0.01
   6  -5  -5    0.00    0.01
  -6   5   5    0.01    0.01
  -6   5   5    0.01    0.01
  -6   5   5    0.02    0.01
   6   5  -5    0.01    0.01
  -6   5   5    0.01    0.01
  -6   5   5    0.01    0.01
  -6   5   5    0.01    0.01
  -6   5   5    0.00    0.01
   6   5  -5    0.02    0.01
   5  -5  -5    0.07    0.01
   5  -5  -5    0.07    0.01
   5  -5  -5    0.05    0.01
   5  -5  -5    0.06    0.01
  -5   5   5    0.05    0.01
   5   5  -5    0.06    0.01
   5   5  -5    0.05    0.01
   4  -5  -5    0.39    0.02
   4  -5  -5    0.42    0.01
   4   5  -5    0.40    0.02
   3  -5  -5    2.75    0.07
   3  -5  -5    2.72    0.06
   3  -5  -5    2.85    0.07
   3   5  -5    2.90    0.08
   2  -5  -5    0.11    0.01
   2  -5  -5    0.09    0.01
  -2  -5   5    0.09    0.01
   2   5  -5    0.13    0.01
  -1  -5   5    0.09    0.01
  -1  -5   5    0.09    0.01
   1  -5  -5    0.08    0.01
   1   5  -5    0.08    0.01
   0  -5  -5    0.01    0.00
   0  -5   5    0.02    0.01
   0  -5   5    0.01    0.01
   0  -5   5    0.02    0.01
   0  -5  -5    0.03    0.00
   0   5  -5    0.03    0.01
  -1  -5  -5    1.05    0.03
   1  -5   5    1.04    0.03
  -1  -5  -5    1.04    0.03
   1  -5   5    1.03    0.03
   1  -5   5    1.05    0.03
  -1   5  -5    1.04    0.03
  -2  -5  -5    0.26    0.01
   2  -5   5    0.25    0.01
   2  -5   5    0.25    0.02
   2  -5   5    0.26    0.01
  -2  -5  -5    0.25    0.01
   2  -5   5    0.26    0.01
  -2   5  -5    0.26    0.02
   3  -5   5    0.21    0.01
  -3  -5  -5    0.21    0.01
  -3  -5  -5    0.22    0.01
   3  -5   5    0.22    0.01
   3  -5   5    0.22    0.02
   3  -5   5    0.23    0.02
  -3   5  -5    0.23    0.02
   4  -5   5    0.20    0.02
   4  -5   5    0.19    0.01
  -4  -5  -5    0.19    0.01
   4  -5   5    0.19    0.01
   4  -5   5    0.17    0.01
  -4  -5  -5    0.19    0.01
  -4   5  -5    0.17    0.02
  -5  -5  -5    0.01    0.01
   5  -5   5   -0.01    0.01
   5  -5   5    0.00    0.01
  -5  -5  -5    0.01    0.01
  -5   5  -5    0.00    0.01
  -5   5  -5    0.00    0.01
   5   5   5    0.00    0.01
   5   5   5    0.01    0.01
   6  -5   5    0.08    0.01
   6  -5   5    0.09    0.01
   6  -5   5    0.09    0.01
  -6   5  -5    0.08    0.02
   6   5   5    0.08    0.01
  -6   5  -5    0.07    0.01
   6   5   5    0.08    0.01
  -6   5  -5    0.10    0.01
   6   5   5    0.08    0.01
  -6   5  -5    0.10    0.01
   6   5   5    0.11    0.01
   7  -5   5    0.02    0.01
   7   5   5    0.03    0.01
  -7   5  -5    0.05    0.01
   7   5   5    0.03    0.01
  -7   5  -5    0.02    0.01
  -7   5  -5    0.03    0.01
  -7   5  -5    0.03    0.01
   7   5   5    0.03    0.01
  -8  -5  -5    0.02    0.01
  -8   5  -5    0.02    0.00
  -8   5  -5    0.02    0.01
   8   5   5    0.04    0.01
   8   5   5    0.03    0.01
  -8   5  -5    0.03    0.01
  -8   5  -5    0.03    0.01
  -9  -5  -5    0.05    0.01
  -9   5  -5    0.08    0.01
  -9   5  -5    0.06    0.01
   9   5   5    0.06    0.01
   9   5   5    0.08    0.01
  -9   5  -5    0.06    0.01
 -10   5  -5    0.17    0.01
 -10   5  -5    0.17    0.01
  10   5   5    0.17    0.01
  11   5   5    0.07    0.01
 -11   5  -5    0.08    0.01
 -10  -6   5    0.70    0.02
 -10   6   5    0.73    0.02
  10   6  -5    0.71    0.02
 -10   6   5    0.70    0.02
 -10   6   5    0.70    0.02
 -10   6   5    0.73    0.02
  -9  -6   5    0.06    0.01
  -9   6   5    0.04    0.01
  -9   6   5    0.04    0.01
  -9   6   5    0.06    0.01
  -9   6   5    0.05    0.01
  -9   6   5    0.05    0.01
   9   6  -5    0.05    0.01
  -8  -6   5    1.04    0.03
  -8   6   5    1.04    0.03
  -8   6   5    1.07    0.03
  -8   6   5    1.12    0.03
  -8   6   5    1.02    0.03
  -8   6   5    1.11    0.03
  -7  -6   5    2.84    0.07
  -7   6   5    2.78    0.06
  -7   6   5    2.86    0.06
  -7   6   5    2.71    0.06
  -7   6   5    2.80    0.06
  -7   6   5    2.71    0.07
  -7   6   5    2.82    0.06
  -6  -6   5    1.54    0.05
  -6   6   5    1.59    0.04
  -6   6   5    1.60    0.04
  -6   6   5    1.58    0.04
  -6   6   5    1.58    0.04
  -6   6   5    1.59    0.04
  -6   6   5    1.62    0.04
   5  -6  -5    1.95    0.06
   5  -6  -5    1.98    0.05
   5  -6  -5    2.05    0.06
  -5  -6   5    2.06    0.05
   5   6  -5    2.05    0.06
  -5   6   5    2.08    0.05
  -5   6   5    2.09    0.05
  -5   6   5    2.11    0.05
  -5   6   5    2.02    0.05
  -5   6   5    2.03    0.05
  -5   6   5    2.16    0.05
   4  -6  -5    1.37    0.03
   4  -6  -5    1.39    0.04
   4  -6  -5    1.36    0.04
  -4  -6   5    1.37    0.04
  -4   6   5    1.33    0.03
  -4   6   5    1.36    0.04
  -4   6   5    1.39    0.03
  -4   6   5    1.38    0.04
  -4   6   5    1.40    0.03
   4   6  -5    1.31    0.04
  -4   6   5    1.34    0.04
   4   6  -5    1.36    0.05
   3  -6  -5    0.12    0.01
   3  -6  -5    0.11    0.01
   3  -6  -5    0.12    0.01
   3  -6  -5    0.10    0.01
   3   6  -5    0.11    0.02
   2  -6  -5    0.82    0.03
   2  -6  -5    0.83    0.02
   2  -6  -5    0.81    0.02
   2   6  -5    0.86    0.03
  -1  -6   5    0.35    0.01
  -1  -6   5    0.36    0.02
   1  -6  -5    0.35    0.01
   1  -6  -5    0.33    0.01
   1  -6  -5    0.34    0.02
   1   6  -5    0.36    0.02
   0  -6  -5    0.30    0.01
   0  -6   5    0.30    0.01
   0  -6   5    0.28    0.02
   0  -6  -5    0.29    0.01
   0   6  -5    0.28    0.02
  -1  -6  -5    2.27    0.05
  -1  -6  -5    2.40    0.05
   1  -6   5    2.27    0.06
   1  -6   5    2.33    0.06
   1  -6   5    2.29    0.05
  -2  -6  -5    0.01    0.01
   2  -6   5    0.01    0.01
   2  -6   5    0.02    0.01
   2  -6   5    0.02    0.01
   2  -6   5    0.02    0.01
  -2  -6  -5    0.00    0.01
   3  -6   5    0.09    0.01
  -3  -6  -5    0.09    0.01
   3  -6   5    0.09    0.01
   3  -6   5    0.09    0.01
   3  -6   5    0.10    0.01
  -3  -6  -5    0.10    0.01
   3   6   5    0.10    0.01
  -3   6  -5    0.10    0.01
  -3   6  -5    0.09    0.01
   4  -6   5    0.16    0.01
   4  -6   5    0.16    0.01
  -4  -6  -5    0.19    0.01
  -4  -6  -5    0.19    0.01
   4  -6   5    0.17    0.01
  -4   6  -5    0.19    0.01
   4   6   5    0.18    0.01
  -4   6  -5    0.19    0.02
  -4   6  -5    0.19    0.01
   4   6   5    0.19    0.01
   4   6   5    0.18    0.01
   4   6   5    0.16    0.01
  -4   6  -5    0.22    0.02
  -4   6  -5    0.17    0.01
  -4   6  -5    0.21    0.02
  -4   6  -5    0.16    0.01
   4   6   5    0.20    0.01
  -5   6  -5    0.01    0.01
  -5   6  -5    0.01    0.01
   5   6   5    0.01    0.01
   5   6   5    0.00    0.01
   5   6   5    0.01    0.01
  -5   6  -5    0.01    0.01
  -5   6  -5    0.01    0.01
  -5   6  -5    0.02    0.01
   5   6   5    0.01    0.01
   6   6   5    0.27    0.02
  -6   6  -5    0.26    0.02
  -6   6  -5    0.27    0.01
   6   6   5    0.27    0.01
   6   6   5    0.27    0.02
  -6   6  -5    0.26    0.01
  -6   6  -5    0.27    0.02
  -6   6  -5    0.27    0.02
  -6   6  -5    0.28    0.01
  -7   6  -5    2.81    0.06
  -7   6  -5    2.80    0.05
   7   6   5    2.75    0.06
  -7   6  -5    2.70    0.06
   7   6   5    2.78    0.06
  -7   6  -5    2.78    0.06
  -7   6  -5    2.83    0.06
  -8  -6  -5    0.26    0.01
   8   6   5    0.28    0.01
  -8   6  -5    0.27    0.02
  -8   6  -5    0.27    0.01
  -8   6  -5    0.30    0.01
  -8   6  -5    0.27    0.01
  -8   6  -5    0.29    0.01
  -9  -6  -5    0.26    0.01
  -9   6  -5    0.27    0.01
   9   6   5    0.27    0.01
  -9   6  -5    0.24    0.01
  -9   6  -5    0.28    0.01
  -9   6  -5    0.28    0.01
 -10   6  -5    0.02    0.01
 -10   6  -5    0.03    0.00
  10   6   5    0.02    0.00
  10   6   5    0.02    0.00
 -10   7   5    0.07    0.01
  -9   7   5    0.07    0.01
  -9   7   5    0.05    0.01
  -9   7   5    0.07    0.01
  -9   7   5    0.06    0.01
   9   7  -5    0.07    0.01
  -9   7   5    0.06    0.01
  -8  -7   5    0.00    0.01
  -8   7   5    0.00    0.01
  -8   7   5   -0.01    0.01
  -8   7   5    0.00    0.01
  -8   7   5    0.02    0.01
  -8   7   5    0.00    0.01
   8   7  -5    0.00    0.01
  -8   7   5    0.00    0.01
  -7  -7   5    0.06    0.01
   7   7  -5    0.07    0.01
  -7   7   5    0.06    0.01
  -7   7   5    0.06    0.01
  -7   7   5    0.08    0.01
  -7   7   5    0.06    0.01
  -7   7   5    0.07    0.01
  -7   7   5    0.05    0.01
  -6  -7   5    0.06    0.01
  -6   7   5    0.05    0.01
   6   7  -5    0.05    0.01
  -6   7   5    0.06    0.01
  -6   7   5    0.05    0.01
  -6   7   5    0.05    0.01
  -6   7   5    0.06    0.01
  -6   7   5    0.05    0.01
  -5  -7   5    1.44    0.04
  -5   7   5    1.44    0.04
  -5   7   5    1.43    0.04
  -5   7   5    1.46    0.04
   5   7  -5    1.46    0.04
  -5   7   5    1.43    0.04
  -5   7   5    1.45    0.04
  -5   7   5    1.50    0.04
  -5   7   5    1.47    0.04
  -4  -7   5    1.35    0.04
  -4   7   5    1.35    0.03
  -4   7   5    1.36    0.03
   4   7  -5    1.36    0.04
  -4   7   5    1.39    0.04
  -4   7   5    1.36    0.04
  -4   7   5    1.34    0.03
  -4   7   5    1.37    0.03
  -4   7   5    1.37    0.04
   4   7  -5    1.40    0.03
   3  -7  -5    3.69    0.09
   3  -7  -5    3.40    0.08
  -3  -7   5    3.60    0.08
   3  -7  -5    3.50    0.08
  -3   7   5    3.55    0.08
  -3   7   5    3.55    0.07
  -3   7   5    3.57    0.07
  -3   7   5    3.50    0.07
  -3   7   5    3.53    0.08
  -3   7   5    3.53    0.07
  -3   7   5    3.50    0.07
   3   7  -5    3.53    0.08
   3   7  -5    3.45    0.07
   3   7  -5    3.60    0.07
   2  -7  -5    1.32    0.03
   2  -7  -5    1.37    0.03
   2  -7  -5    1.35    0.04
  -2  -7   5    1.39    0.04
  -2   7   5    1.35    0.04
   2   7  -5    1.28    0.04
   2   7  -5    1.31    0.04
  -2   7   5    1.35    0.04
   2   7  -5    1.36    0.03
   2   7  -5    1.39    0.04
   2   7  -5    1.35    0.03
  -2   7   5    1.30    0.03
  -2   7   5    1.33    0.03
  -2   7   5    1.37    0.03
  -2   7   5    1.36    0.04
  -2   7   5    1.32    0.03
   1  -7  -5    2.94    0.07
   1  -7  -5    2.88    0.06
  -1  -7   5    2.89    0.07
  -1  -7   5    2.88    0.07
   1  -7  -5    2.90    0.07
  -1   7   5    2.78    0.06
   1   7  -5    2.85    0.06
   1   7  -5    2.85    0.06
  -1   7   5    2.90    0.06
   1   7  -5    2.92    0.06
   1   7  -5    2.91    0.06
  -1   7   5    2.94    0.06
  -1   7   5    2.87    0.06
  -1   7   5    2.88    0.06
  -1   7   5    2.88    0.06
  -1   7   5    2.88    0.06
   0  -7  -5    0.89    0.03
   0  -7  -5    0.85    0.02
   0  -7   5    0.82    0.03
   0  -7   5    0.85    0.03
   0  -7  -5    0.81    0.02
   0   7  -5    0.85    0.03
   0   7   5    0.85    0.02
   0   7   5    0.83    0.03
   0   7  -5    0.82    0.03
   0   7   5    0.79    0.03
   0   7   5    0.82    0.03
   0   7   5    0.82    0.03
   0   7  -5    0.81    0.02
   1  -7   5    2.55    0.06
   1  -7   5    2.60    0.07
  -1  -7  -5    2.58    0.06
  -1  -7  -5    2.63    0.06
  -1  -7  -5    2.58    0.06
  -1   7  -5    2.63    0.06
   1   7   5    2.59    0.06
  -1   7  -5    2.52    0.05
  -1   7  -5    2.57    0.05
  -1   7  -5    2.56    0.06
  -1   7  -5    2.55    0.06
   1   7   5    2.56    0.06
   1   7   5    2.51    0.06
  -1   7  -5    2.42    0.05
   1   7   5    2.56    0.06
   1   7   5    2.65    0.06
  -1   7  -5    2.59    0.06
  -2  -7  -5    1.02    0.03
   2  -7   5    1.03    0.03
  -2  -7  -5    1.00    0.03
   2  -7   5    0.96    0.03
  -2   7  -5    1.03    0.02
  -2   7  -5    0.98    0.03
   2   7   5    0.97    0.03
  -2   7  -5    0.99    0.03
   2   7   5    0.99    0.03
  -2   7  -5    1.00    0.03
   2   7   5    1.00    0.02
  -2   7  -5    1.00    0.03
  -2   7  -5    0.98    0.03
   2   7   5    1.02    0.03
  -2   7  -5    0.98    0.03
   2   7   5    0.98    0.03
  -3   7  -5    0.72    0.02
  -3   7  -5    0.75    0.02
  -3   7  -5    0.74    0.03
  -3   7  -5    0.76    0.02
   3   7   5    0.74    0.02
   3   7   5    0.72    0.03
   3   7   5    0.77    0.03
   3   7   5    0.75    0.02
  -3   7  -5    0.75    0.03
  -3   7  -5    0.74    0.02
  -3   7  -5    0.71    0.03
   4   7   5    0.68    0.03
  -4   7  -5    0.70    0.03
  -4   7  -5    0.70    0.02
  -4   7  -5    0.70    0.02
   4   7   5    0.66    0.02
   4   7   5    0.70    0.02
  -4   7  -5    0.69    0.03
   4   7   5    0.72    0.03
  -4   7  -5    0.71    0.03
  -4   7  -5    0.73    0.02
  -5   7  -5    0.00    0.01
  -5   7  -5   -0.01    0.01
  -5   7  -5    0.01    0.01
   5   7   5    0.00    0.01
  -5   7  -5    0.00    0.01
  -5   7  -5    0.00    0.00
   5   7   5    0.00    0.00
   5   7   5    0.00    0.00
   5   7   5    0.01    0.01
   5   7   5    0.00    0.01
  -5   7  -5    0.00    0.01
  -6   7  -5    0.00    0.01
  -6   7  -5    0.01    0.01
  -6   7  -5    0.01    0.01
  -6   7  -5    0.01    0.00
   6   7   5    0.02    0.01
  -6   7  -5   -0.01    0.01
   6   7   5    0.00    0.00
   6   7   5    0.01    0.01
  -7   7  -5    0.05    0.01
  -7   7  -5    0.05    0.01
  -7   7  -5    0.05    0.01
  -7   7  -5    0.06    0.01
   7   7   5    0.05    0.00
  -7   7  -5    0.05    0.01
   7   7   5    0.05    0.01
  -8  -7  -5    0.01    0.01
  -8   7  -5    0.01    0.00
  -8   7  -5    0.01    0.01
  -8   7  -5    0.02    0.01
  -8   7  -5    0.01    0.01
  -9  -7  -5    0.34    0.01
  -9   7  -5    0.32    0.01
  -9   7  -5    0.33    0.01
  -9   7  -5    0.34    0.01
  -9   8   5    0.10    0.01
  -9   8   5    0.12    0.01
  -9   8   5    0.12    0.01
  -8   8   5    0.00    0.00
  -8   8   5    0.01    0.01
  -8   8   5    0.00    0.01
  -8   8   5    0.00    0.01
  -8   8   5    0.01    0.01
   8   8  -5    0.00    0.00
   8   8  -5    0.00    0.00
  -8   8   5    0.01    0.01
  -7  -8   5    0.22    0.01
  -7  -8   5    0.23    0.01
   7   8  -5    0.22    0.01
  -7   8   5    0.21    0.01
  -7   8   5    0.22    0.01
  -7   8   5    0.25    0.02
  -7   8   5    0.21    0.02
  -7   8   5    0.23    0.01
  -7   8   5    0.23    0.01
  -6  -8   5    0.08    0.01
  -6   8   5    0.07    0.01
  -6   8   5    0.07    0.01
  -6   8   5    0.08    0.01
  -6   8   5    0.06    0.01
   6   8  -5    0.08    0.01
  -6   8   5    0.07    0.01
  -6   8   5    0.08    0.01
  -6   8   5    0.07    0.01
  -5  -8   5    0.56    0.02
   5   8  -5    0.53    0.02
  -5   8   5    0.49    0.02
  -5   8   5    0.49    0.02
  -5   8   5    0.51    0.02
  -5   8   5    0.51    0.02
  -5   8   5    0.51    0.02
  -5   8   5    0.55    0.02
  -5   8   5    0.52    0.02
  -4  -8   5    0.33    0.02
  -4   8   5    0.34    0.02
  -4   8   5    0.33    0.02
  -4   8   5    0.35    0.02
  -4   8   5    0.31    0.01
   4   8  -5    0.34    0.01
  -4   8   5    0.33    0.02
  -4   8   5    0.31    0.02
  -4   8   5    0.31    0.02
  -3  -8   5    2.04    0.05
  -3   8   5    2.03    0.05
   3   8  -5    2.03    0.04
  -3   8   5    2.01    0.05
  -3   8   5    2.01    0.05
  -3   8   5    1.92    0.05
   3   8  -5    1.91    0.05
   3   8  -5    1.95    0.04
  -3   8   5    2.04    0.05
  -3   8   5    2.07    0.05
  -2  -8   5    3.23    0.07
  -2   8   5    3.24    0.07
  -2   8   5    3.25    0.07
   2   8  -5    3.23    0.07
   2   8  -5    3.23    0.07
   2   8  -5    3.16    0.07
  -2   8   5    3.21    0.07
  -2   8   5    3.15    0.07
  -2   8   5    3.15    0.07
  -2   8   5    3.14    0.07
   2   8  -5    3.19    0.06
  -1  -8   5    0.01    0.01
   1   8  -5    0.01    0.01
   1   8  -5    0.02    0.01
   1   8  -5    0.02    0.01
  -1   8   5    0.02    0.01
  -1   8   5   -0.01    0.01
  -1   8   5    0.00    0.01
   1   8  -5    0.01    0.01
   1   8  -5    0.02    0.01
  -1   8   5    0.01    0.01
  -1   8   5    0.02    0.01
  -1   8   5    0.01    0.01
  -1   8   5    0.02    0.01
   0  -8   5    3.62    0.08
   0   8  -5    3.67    0.08
   0   8  -5    3.62    0.08
   0   8  -5    3.65    0.07
   0   8   5    3.62    0.08
   0   8  -5    3.43    0.08
   0   8   5    3.61    0.08
   0   8  -5    3.53    0.07
   0   8   5    3.62    0.08
   0   8   5    3.66    0.08
   0   8  -5    3.76    0.08
   0   8   5    3.69    0.08
   1  -8   5    3.01    0.07
  -1   8  -5    3.07    0.07
   1   8   5    3.11    0.07
  -1   8  -5    3.10    0.06
  -1   8  -5    3.13    0.07
   1   8   5    3.21    0.07
   1   8   5    3.20    0.07
  -1   8  -5    3.15    0.06
  -1   8  -5    3.08    0.07
   1   8   5    3.13    0.06
  -1   8  -5    3.21    0.07
   1   8   5    3.12    0.07
  -1   8  -5    3.13    0.07
  -2   8  -5    0.20    0.01
  -2   8  -5    0.21    0.01
  -2   8  -5    0.19    0.01
   2   8   5    0.16    0.01
   2   8   5    0.22    0.02
  -2   8  -5    0.19    0.01
   2   8   5    0.21    0.02
   2   8   5    0.21    0.01
  -2   8  -5    0.18    0.01
  -2   8  -5    0.17    0.01
   2   8   5    0.20    0.01
   3   8   5    0.18    0.01
  -3   8  -5    0.18    0.01
  -3   8  -5    0.22    0.02
  -3   8  -5    0.21    0.02
  -3   8  -5    0.20    0.01
  -3   8  -5    0.20    0.02
   3   8   5    0.20    0.01
   3   8   5    0.20    0.01
   3   8   5    0.20    0.02
   3   8   5    0.19    0.02
  -3   8  -5    0.19    0.01
  -4   8  -5    0.04    0.01
  -4   8  -5    0.03    0.00
  -4   8  -5    0.03    0.01
   4   8   5    0.02    0.01
   4   8   5    0.04    0.01
  -4   8  -5    0.07    0.01
  -4   8  -5    0.03    0.01
  -4   8  -5    0.03    0.01
   4   8   5    0.02    0.01
   5   8   5    0.01    0.01
  -5   8  -5   -0.01    0.01
  -5   8  -5    0.00    0.01
  -5   8  -5    0.01    0.01
  -5   8  -5    0.00    0.01
   5   8   5   -0.01    0.01
  -5   8  -5    0.00    0.01
   5   8   5    0.01    0.01
   6   8   5    0.05    0.01
  -6   8  -5    0.04    0.01
  -6   8  -5    0.06    0.01
  -6   8  -5    0.04    0.01
  -6   8  -5    0.02    0.01
   6   8   5    0.03    0.01
  -6   8  -5    0.03    0.01
  -7  -8  -5    0.09    0.01
  -7   8  -5    0.10    0.01
  -7   8  -5    0.09    0.01
  -7   8  -5    0.09    0.01
  -7   8  -5    0.11    0.01
   7   8   5    0.09    0.01
  -8  -8  -5    0.01    0.00
  -8   8  -5    0.01    0.01
  -8   8  -5    0.00    0.00
  -7   9   5    0.38    0.01
  -7   9   5    0.41    0.02
  -7   9   5    0.38    0.01
   7   9  -5    0.39    0.01
  -7   9   5    0.39    0.02
  -7   9   5    0.37    0.01
  -7   9   5    0.40    0.01
  -6   9   5    1.23    0.03
  -6   9   5    1.22    0.03
   6   9  -5    1.18    0.03
  -6   9   5    1.23    0.03
  -6   9   5    1.26    0.03
  -6   9   5    1.27    0.03
  -6   9   5    1.13    0.03
  -6   9   5    1.21    0.03
  -5  -9   5    3.34    0.08
  -5   9   5    3.66    0.08
  -5   9   5    3.45    0.07
  -5   9   5    3.75    0.07
  -5   9   5    3.54    0.08
  -5   9   5    3.63    0.07
  -5   9   5    3.62    0.07
   5   9  -5    3.44    0.07
  -5   9   5    3.63    0.07
  -4  -9   5    0.40    0.02
  -4   9   5    0.40    0.02
  -4   9   5    0.42    0.02
  -4   9   5    0.36    0.02
  -4   9   5    0.40    0.02
   4   9  -5    0.41    0.01
  -4   9   5    0.40    0.02
  -4   9   5    0.42    0.02
  -3  -9   5    0.37    0.02
  -3   9   5    0.40    0.02
   3   9  -5    0.41    0.02
  -3   9   5    0.41    0.02
  -3   9   5    0.39    0.02
  -3   9   5    0.38    0.02
  -3   9   5    0.39    0.02
  -3   9   5    0.39    0.02
   3   9  -5    0.39    0.01
  -2  -9   5    0.46    0.02
   2   9  -5    0.46    0.02
  -2   9   5    0.49    0.02
  -2   9   5    0.48    0.02
   2   9  -5    0.45    0.02
  -2   9   5    0.47    0.02
   2   9  -5    0.47    0.01
  -2   9   5    0.48    0.02
  -2   9   5    0.46    0.02
  -2   9   5    0.45    0.02
  -1  -9   5    0.35    0.02
  -1   9   5    0.35    0.02
  -1   9   5    0.36    0.02
  -1   9   5    0.36    0.02
   1   9  -5    0.35    0.01
   1   9  -5    0.33    0.02
  -1   9   5    0.36    0.02
  -1   9   5    0.37    0.02
   1   9  -5    0.37    0.02
  -1   9   5    0.37    0.02
   0  -9   5    0.00    0.01
   0   9   5    0.00    0.01
   0   9   5    0.00    0.00
   0   9  -5    0.01    0.01
   0   9  -5    0.00    0.00
   0   9   5    0.01    0.01
   0   9  -5   -0.01    0.01
   0   9  -5    0.01    0.01
   0   9   5    0.01    0.01
   0   9   5    0.00    0.01
   1  -9   5    0.49    0.02
  -1   9  -5    0.49    0.01
  -1   9  -5    0.47    0.02
   1   9   5    0.48    0.02
  -1   9  -5    0.47    0.02
  -1   9  -5    0.49    0.02
  -1   9  -5    0.50    0.02
   1   9   5    0.51    0.02
   1   9   5    0.50    0.02
  -1   9  -5    0.50    0.02
   1   9   5    0.47    0.02
   1   9   5    0.49    0.02
   2  -9   5    0.00    0.01
  -2   9  -5   -0.01    0.00
  -2   9  -5    0.00    0.01
   2   9   5    0.00    0.01
   2   9   5    0.00    0.00
   2   9   5    0.00    0.01
  -2   9  -5    0.01    0.01
  -2   9  -5    0.00    0.01
   2   9   5    0.00    0.01
   2   9   5    0.00    0.01
   3  -9   5    0.04    0.01
   3   9   5    0.03    0.01
  -3   9  -5    0.03    0.01
  -3   9  -5    0.02    0.01
   3   9   5    0.03    0.01
   3   9   5    0.02    0.01
  -3   9  -5    0.02    0.01
   3   9   5    0.03    0.01
  -3   9  -5    0.03    0.01
   3   9   5    0.01    0.01
  -4   9  -5    0.04    0.01
  -4   9  -5    0.02    0.01
   4   9   5    0.04    0.01
   4   9   5    0.03    0.01
   4   9   5    0.04    0.01
  -4   9  -5    0.03    0.01
  -4   9  -5    0.03    0.01
  -5   9  -5    0.00    0.01
   5   9   5    0.01    0.01
  -5   9  -5    0.00    0.01
   5   9   5   -0.01    0.00
  -5   9  -5    0.00    0.01
  -5   9  -5    0.00    0.00
   5   9   5    0.01    0.01
   6   9   5    0.02    0.01
  -6   9  -5    0.00    0.01
  -6   9  -5    0.00    0.00
  -6   9  -5    0.00    0.00
  -6   9  -5    0.00    0.01
   6   9   5    0.01    0.01
  -7  -9  -5    0.01    0.00
  -7   9  -5    0.01    0.00
  -7   9  -5    0.01    0.00
  -7   9  -5    0.01    0.00
  -6  10   5    0.02    0.01
  -6  10   5    0.01    0.01
  -6  10   5    0.00    0.00
  -6  10   5    0.01    0.00
  -6  10   5    0.01    0.00
  -5  10   5    0.02    0.01
  -5  10   5    0.02    0.01
  -5  10   5    0.02    0.00
  -5  10   5    0.01    0.00
  -5  10   5    0.02    0.00
  -5  10   5    0.02    0.01
  -4 -10   5    0.02    0.01
  -4  10   5    0.02    0.01
  -4  10   5    0.01    0.01
  -4  10   5    0.02    0.01
  -4  10   5    0.01    0.01
  -4  10   5    0.01    0.01
  -4  10   5    0.01    0.01
  -3 -10   5    0.01    0.01
  -3  10   5    0.00    0.01
  -3  10   5    0.00    0.01
  -3  10   5   -0.01    0.01
  -3  10   5    0.01    0.01
  -3  10   5    0.00    0.01
  -3  10   5    0.00    0.01
  -2 -10   5    0.09    0.01
  -2  10   5    0.09    0.01
  -2  10   5    0.12    0.01
  -2  10   5    0.11    0.01
  -2  10   5    0.10    0.01
   2  10  -5    0.09    0.01
  -2  10   5    0.09    0.01
  -2  10   5    0.11    0.01
  -2  10   5    0.11    0.01
  -1 -10   5    0.04    0.01
  -1  10   5    0.05    0.01
  -1  10   5    0.06    0.01
   1  10  -5    0.07    0.01
  -1  10   5    0.06    0.01
   1  10  -5    0.07    0.01
  -1  10   5    0.06    0.01
  -1  10   5    0.06    0.01
   0 -10   5    0.03    0.01
   0  10   5    0.01    0.01
   0  10   5    0.02    0.01
   0  10   5    0.01    0.01
   0  10   5    0.02    0.00
   0  10   5    0.01    0.01
   0  10  -5    0.02    0.01
   0  10  -5    0.02    0.01
   1 -10   5    0.12    0.01
   1  10   5    0.14    0.01
   1  10   5    0.15    0.01
   1  10   5    0.10    0.01
  -1  10  -5    0.13    0.01
  -1  10  -5    0.13    0.01
  -1  10  -5    0.12    0.01
  -1  10  -5    0.14    0.01
   1  10   5    0.13    0.01
   1  10   5    0.13    0.01
   2 -10   5    0.31    0.01
  -2  10  -5    0.34    0.02
   2  10   5    0.32    0.01
   2  10   5    0.32    0.02
  -2  10  -5    0.31    0.01
  -2  10  -5    0.31    0.01
   2  10   5    0.33    0.02
   2  10   5    0.32    0.01
   2  10   5    0.33    0.01
  -2  10  -5    0.32    0.01
   3 -10   5    0.02    0.01
   3  10   5    0.02    0.01
  -3  10  -5    0.02    0.01
  -3  10  -5    0.03    0.01
   3  10   5    0.03    0.01
   3  10   5    0.03    0.01
   3  10   5    0.03    0.01
  -3  10  -5    0.02    0.00
  -3  10  -5    0.02    0.01
   4 -10   5    0.02    0.01
   4  10   5    0.01    0.00
   4  10   5    0.02    0.01
  -4  10  -5    0.02    0.00
  -4  10  -5    0.01    0.01
  -4  10  -5    0.03    0.01
   4  10   5    0.02    0.01
  -4  10  -5    0.03    0.01
   5 -10   5    0.03    0.01
  -5  10  -5    0.04    0.01
   5  10   5    0.05    0.01
  -5  10  -5    0.03    0.01
   5  10   5    0.04    0.01
  -5  10  -5    0.04    0.00
  -5  10  -5    0.04    0.01
  -3  11   5    0.00    0.00
  -3  11   5    0.00    0.00
  -3  11   5    0.00    0.00
  -3  11   5    0.00    0.00
  -2  11   5    0.00    0.00
  -2  11   5    0.00    0.00
  -2  11   5    0.00    0.00
  -2  11   5    0.00    0.01
  -2  11   5    0.00    0.00
  -1 -11   5    0.01    0.00
  -1  11   5    0.01    0.00
  -1  11   5    0.00    0.01
  -1  11   5    0.01    0.00
  -1  11   5    0.00    0.00
  -1  11   5    0.01    0.00
   0 -11   5    0.01    0.00
   0  11   5    0.00    0.00
   0  11   5    0.00    0.01
   0  11   5   -0.01    0.00
   0  11   5    0.00    0.00
   0  11   5    0.00    0.00
   1 -11   5    0.03    0.01
  -1  11  -5    0.03    0.01
   1  11   5    0.04    0.01
   1  11   5    0.03    0.01
   1  11   5    0.03    0.01
   1  11   5    0.04    0.00
   1  11   5    0.04    0.00
   2 -11   5    0.01    0.01
   2  11   5    0.01    0.00
  -2  11  -5    0.02    0.00
   2  11   5    0.01    0.00
   2  11   5    0.02    0.00
   3  11   5    0.14    0.01
 -12   0   6    0.88    0.02
 -12   0   6    0.88    0.02
  12   0  -6    0.89    0.02
 -11   0   6    0.00    0.00
 -11   0   6    0.00    0.00
  11   0  -6    0.01    0.01
 -11   0   6    0.00    0.01
 -11   0   6    0.00    0.01
 -11   0   6    0.00    0.01
 -10   0   6    0.38    0.02
 -10   0   6    0.39    0.02
  10   0  -6    0.43    0.02
 -10   0   6    0.37    0.02
 -10   0   6    0.41    0.01
  -9   0   6    0.00    0.00
  -9   0   6    0.00    0.01
   9   0  -6    0.00    0.01
  -9   0   6    0.00    0.01
  -8   0   6    0.02    0.01
   8   0  -6    0.00    0.01
  -8   0   6    0.00    0.01
  -8   0   6    0.00    0.00
  -8   0   6    0.00    0.01
   8   0  -6    0.00    0.01
   7   0  -6   -0.01    0.01
   7   0  -6    0.07    0.01
   7   0  -6    0.00    0.01
   6   0  -6   48.83    1.03
   6   0  -6   48.49    1.11
   6   0  -6   48.84    0.99
   5   0  -6    0.01    0.01
   5   0  -6    0.00    0.01
   5   0  -6    0.01    0.01
   4   0  -6    0.47    0.02
   4   0  -6    0.46    0.02
   4   0  -6    0.45    0.02
   4   0  -6    0.49    0.01
   3   0  -6    0.00    0.01
   3   0  -6    0.01    0.00
   3   0  -6    0.00    0.01
   2   0  -6    1.72    0.04
   2   0  -6    1.70    0.04
   2   0  -6    1.66    0.04
   2   0  -6    1.76    0.04
  -1   0   6    0.02    0.00
   1   0  -6    0.00    0.01
   1   0  -6    0.00    0.00
   1   0  -6    0.02    0.01
   1   0  -6    0.00    0.00
   0   0  -6   26.13    0.51
   0   0  -6   26.07    0.58
   0   0  -6   23.54    0.57
   0   0   6   24.85    0.52
   0   0  -6   24.17    0.53
  -1   0  -6    0.00    0.01
   1   0   6    0.00    0.00
  -1   0  -6    0.00    0.01
   1   0   6    0.00    0.00
  -1   0  -6   -0.01    0.01
  -2   0  -6    4.54    0.09
  -2   0  -6    4.54    0.11
  -2   0  -6    4.45    0.10
   2   0   6    4.39    0.10
   2   0   6    4.54    0.10
  -3   0  -6    0.00    0.01
  -3   0  -6    0.00    0.01
  -3   0  -6    0.00    0.01
   3   0   6    0.00    0.01
   4   0   6    5.92    0.13
  -4   0  -6    6.08    0.14
  -4   0  -6    5.85    0.12
   4   0   6    5.79    0.13
  -4   0  -6    5.79    0.13
   5   0   6    0.00    0.01
  -5   0  -6    0.02    0.01
   6   0   6    0.02    0.01
   6   0   6    0.01    0.01
   7   0   6    0.01    0.01
  -7   0  -6    0.03    0.01
   7   0   6    0.01    0.01
   7   0   6    0.01    0.01
  -8   0  -6    0.72    0.02
   8   0   6    0.71    0.02
 -11   0  -6    0.00    0.01
 -12   0  -6    0.15    0.01
  12  -1  -6    2.21    0.04
 -12  -1   6    2.21    0.05
 -12  -1   6    2.14    0.04
 -12   1   6    2.21    0.04
 -12   1   6    2.18    0.05
  12   1  -6    2.16    0.04
 -11  -1   6    0.07    0.01
 -11  -1   6    0.07    0.01
 -11  -1   6    0.08    0.01
 -11  -1   6    0.07    0.01
  11  -1  -6    0.07    0.01
 -11   1   6    0.05    0.01
  11   1  -6    0.09    0.01
 -11   1   6    0.08    0.01
  10  -1  -6    0.06    0.01
 -10  -1   6    0.08    0.01
 -10  -1   6    0.07    0.01
 -10  -1   6    0.06    0.01
 -10  -1   6    0.06    0.01
  10   1  -6    0.07    0.01
 -10   1   6    0.07    0.01
 -10   1   6    0.07    0.00
 -10   1   6    0.07    0.01
 -10   1   6    0.06    0.01
 -10   1   6    0.06    0.00
  -9  -1   6    5.69    0.12
  -9  -1   6    5.46    0.11
  -9  -1   6    5.52    0.10
  -9  -1   6    5.58    0.11
  -9   1   6    5.38    0.12
  -9   1   6    5.44    0.10
  -9   1   6    5.65    0.11
   9   1  -6    5.52    0.11
  -9   1   6    5.40    0.11
  -8  -1   6    0.11    0.01
  -8  -1   6    0.11    0.01
   8  -1  -6    0.12    0.01
   8  -1  -6    0.13    0.01
   8  -1  -6    0.10    0.01
  -8   1   6    0.13    0.01
  -8   1   6    0.13    0.01
  -8   1   6    0.11    0.01
  -8   1   6    0.12    0.01
   8   1  -6    0.14    0.01
  -8   1   6    0.10    0.01
   8   1  -6    0.11    0.01
  -8   1   6    0.09    0.01
   7  -1  -6    0.21    0.01
   7  -1  -6    0.21    0.02
   7  -1  -6    0.19    0.01
   7   1  -6    0.21    0.02
   7   1  -6    0.18    0.01
   6  -1  -6   14.24    0.31
   6  -1  -6   14.30    0.33
   6  -1  -6   14.33    0.29
   6  -1  -6   13.81    0.32
   6   1  -6   14.54    0.31
   6   1  -6   14.56    0.29
   6   1  -6   14.34    0.33
   5  -1  -6    1.29    0.03
   5  -1  -6    1.30    0.03
   5  -1  -6    1.26    0.04
   5  -1  -6    1.39    0.04
   5   1  -6    1.34    0.04
   5   1  -6    1.33    0.03
   5   1  -6    1.36    0.03
   4  -1  -6    5.91    0.14
   4  -1  -6    5.49    0.13
   4  -1  -6    5.87    0.13
   4  -1  -6    5.91    0.12
   4   1  -6    5.82    0.13
   4   1  -6    5.90    0.14
   4   1  -6    5.77    0.12
   3  -1  -6    7.30    0.17
   3  -1  -6    8.17    0.17
   3  -1  -6    7.85    0.16
   3  -1  -6    7.73    0.18
   3   1  -6    8.07    0.18
   3   1  -6    7.96    0.17
   3   1  -6    8.17    0.16
   3   1  -6    7.95    0.19
   2  -1  -6    6.13    0.14
   2  -1  -6    6.37    0.13
   2  -1  -6    5.89    0.13
   2   1  -6    6.09    0.13
   2   1  -6    6.25    0.13
   2   1  -6    6.01    0.14
   2   1  -6    6.08    0.14
   1  -1  -6   29.73    0.65
   1  -1  -6   32.47    0.66
  -1  -1   6   29.97    0.65
   1  -1  -6   32.65    0.72
   1  -1  -6   32.05    0.71
   1   1  -6   30.70    0.66
   1   1  -6   31.55    0.72
   1   1  -6   31.17    0.72
   1   1  -6   31.19    0.64
   0  -1   6    7.21    0.15
   0  -1  -6    7.79    0.16
   0  -1  -6    7.51    0.17
   0  -1  -6    7.03    0.17
   0  -1  -6    7.53    0.15
   0   1  -6    7.58    0.17
   0   1  -6    7.21    0.16
   0   1  -6    7.17    0.15
   0   1   6    7.16    0.15
   0   1  -6    7.42    0.17
   1  -1   6   19.09    0.40
  -1  -1  -6   19.20    0.40
  -1  -1  -6   20.27    0.45
  -1  -1  -6   19.94    0.41
   1  -1   6   18.90    0.42
   1   1   6   19.54    0.40
  -1   1  -6   19.20    0.39
  -1   1  -6   18.24    0.44
  -1   1  -6   20.45    0.45
  -1   1  -6   18.98    0.41
   1   1   6   19.73    0.42
  -2  -1  -6   13.53    0.27
  -2  -1  -6   13.34    0.28
  -2  -1  -6   13.27    0.31
   2  -1   6   13.47    0.28
   2  -1   6   13.24    0.29
   2   1   6   13.30    0.28
   2   1   6   13.55    0.29
  -2   1  -6   14.16    0.31
  -2   1  -6   13.29    0.27
  -2   1  -6   13.18    0.28
  -3  -1  -6    0.35    0.01
   3  -1   6    0.40    0.02
  -3  -1  -6    0.33    0.01
   3  -1   6    0.37    0.01
  -3  -1  -6    0.34    0.01
  -3   1  -6    0.37    0.02
  -3   1  -6    0.36    0.01
   3   1   6    0.37    0.01
  -3   1  -6    0.37    0.02
   3   1   6    0.35    0.02
   4  -1   6    1.82    0.04
  -4  -1  -6    1.80    0.05
  -4  -1  -6    1.62    0.05
   4  -1   6    1.84    0.05
  -4  -1  -6    1.82    0.04
   4   1   6    1.85    0.04
   4   1   6    1.83    0.05
  -4   1  -6    1.80    0.05
   5  -1   6    0.11    0.01
  -5  -1  -6    0.13    0.01
   5  -1   6    0.11    0.01
   5   1   6    0.12    0.01
  -5   1  -6    0.12    0.01
   5   1   6    0.10    0.01
   6  -1   6    0.14    0.01
   6  -1   6    0.14    0.01
   6   1   6    0.15    0.01
   6   1   6    0.14    0.01
  -6   1  -6    0.17    0.02
   7  -1   6    0.08    0.01
   7  -1   6    0.12    0.01
  -7  -1  -6    0.11    0.01
   7  -1   6    0.12    0.01
  -7   1  -6    0.11    0.01
   7   1   6    0.12    0.01
  -7   1  -6    0.11    0.01
   7   1   6    0.11    0.01
   8  -1   6    2.27    0.05
  -8  -1  -6    2.33    0.05
   9  -1   6    0.54    0.02
  -9  -1  -6    0.52    0.01
 -10   1  -6    0.01    0.01
 -11  -1  -6    0.00    0.01
 -11   1  -6    0.00    0.01
 -12   1  -6    0.11    0.01
 -12   1  -6    0.12    0.01
  12  -2  -6    0.82    0.02
 -12  -2   6    0.80    0.02
 -12  -2   6    0.80    0.02
 -12   2   6    0.83    0.02
 -12   2   6    0.80    0.02
 -11  -2   6    0.01    0.01
 -11  -2   6    0.00    0.01
 -11  -2   6    0.01    0.01
 -11  -2   6    0.01    0.00
  11  -2  -6    0.00    0.01
  11   2  -6    0.01    0.01
 -11   2   6    0.01    0.01
 -11   2   6    0.01    0.01
 -10  -2   6    0.13    0.01
 -10  -2   6    0.14    0.01
 -10  -2   6    0.13    0.01
 -10  -2   6    0.15    0.01
 -10   2   6    0.14    0.01
  10   2  -6    0.16    0.01
 -10   2   6    0.13    0.01
  -9  -2   6    0.49    0.02
  -9  -2   6    0.44    0.02
  -9   2   6    0.47    0.02
  -9   2   6    0.48    0.02
  -9   2   6    0.45    0.02
  -9   2   6    0.43    0.02
   9   2  -6    0.48    0.02
  -9   2   6    0.48    0.02
  -8  -2   6    0.00    0.01
  -8  -2   6    0.00    0.01
  -8   2   6    0.00    0.01
  -8   2   6    0.01    0.01
  -8   2   6    0.00    0.00
   8   2  -6    0.00    0.01
  -8   2   6    0.01    0.00
  -8   2   6    0.00    0.01
  -8   2   6    0.00    0.01
  -8   2   6    0.01    0.01
  -8   2   6    0.01    0.01
   7  -2  -6    1.28    0.04
  -7  -2   6    1.25    0.03
   7  -2  -6    1.20    0.04
  -7  -2   6    1.23    0.04
   7  -2  -6    1.25    0.03
  -7   2   6    1.20    0.03
   7   2  -6    1.17    0.03
   7   2  -6    1.22    0.04
   6  -2  -6    0.09    0.01
   6  -2  -6    0.11    0.01
   6  -2  -6    0.09    0.01
   6  -2  -6    0.09    0.01
   6   2  -6    0.09    0.01
   5  -2  -6    0.08    0.01
   5  -2  -6    0.07    0.01
   5  -2  -6    0.08    0.01
   5   2  -6    0.09    0.01
   5   2  -6    0.07    0.01
   5   2  -6    0.07    0.01
   5   2  -6    0.07    0.01
   4  -2  -6    5.66    0.13
   4  -2  -6    5.47    0.13
   4  -2  -6    5.60    0.12
   4  -2  -6    5.65    0.11
   4   2  -6    5.44    0.12
   4   2  -6    5.55    0.13
   4   2  -6    5.54    0.12
   4   2  -6    5.57    0.13
   3  -2  -6    0.62    0.02
   3  -2  -6    0.63    0.02
   3   2  -6    0.68    0.02
   3   2  -6    0.65    0.02
   3   2  -6    0.68    0.02
   3   2  -6    0.68    0.02
   2  -2  -6   19.56    0.43
   2  -2  -6   18.46    0.41
   2  -2  -6   19.68    0.41
   2  -2  -6   19.56    0.45
   2   2  -6   19.71    0.45
   2   2  -6   19.58    0.45
   2   2  -6   20.28    0.41
   2   2  -6   19.96    0.40
  -1  -2   6    5.89    0.12
   1   2  -6    5.78    0.14
   1   2  -6    5.81    0.14
   1   2  -6    5.78    0.12
   1   2  -6    6.05    0.13
   0  -2  -6   45.48    0.93
   0  -2   6   44.95    0.92
   0  -2  -6   44.75    1.02
   0  -2  -6   41.97    0.93
   0   2  -6   44.91    0.90
   0   2  -6   44.15    1.03
   0   2  -6   44.51    0.93
   0   2  -6   43.60    1.01
   1  -2   6    0.27    0.01
  -1  -2  -6    0.28    0.01
   1  -2   6    0.27    0.01
  -1  -2  -6    0.25    0.01
   1  -2   6    0.30    0.01
  -1  -2  -6    0.28    0.01
  -1   2  -6    0.28    0.02
  -1   2  -6    0.26    0.01
  -1   2  -6    0.28    0.01
  -1   2  -6    0.25    0.01
   2  -2   6    1.29    0.03
  -2  -2  -6    1.24    0.03
   2  -2   6    1.25    0.03
  -2  -2  -6    1.26    0.03
   2   2   6    1.26    0.03
  -2   2  -6    1.17    0.03
  -2   2  -6    1.21    0.04
   3  -2   6    0.02    0.01
  -3  -2  -6    0.02    0.01
   3  -2   6    0.02    0.01
  -3  -2  -6    0.02    0.01
   3   2   6    0.02    0.01
  -3   2  -6    0.02    0.01
   3   2   6    0.01    0.01
  -4  -2  -6    1.33    0.03
   4  -2   6    1.34    0.04
  -4  -2  -6    1.29    0.04
   4  -2   6    1.32    0.04
   4   2   6    1.31    0.04
  -4   2  -6    1.35    0.04
   4   2   6    1.36    0.04
   5  -2   6   12.29    0.26
  -5  -2  -6   12.46    0.27
   5  -2   6   12.48    0.28
  -5  -2  -6   12.27    0.26
   5   2   6   12.65    0.28
  -5   2  -6   12.36    0.29
   6  -2   6    0.42    0.02
   6  -2   6    0.47    0.02
   6   2   6    0.48    0.02
  -6   2  -6    0.45    0.02
   7  -2   6    0.00    0.01
   7  -2   6    0.02    0.01
   7  -2   6    0.02    0.01
  -7  -2  -6    0.01    0.01
   7   2   6    0.01    0.01
  -7   2  -6    0.00    0.01
  -8  -2  -6    0.69    0.02
   8  -2   6    0.71    0.02
  -9  -2  -6    0.03    0.01
   9  -2   6    0.01    0.01
  -9   2  -6    0.01    0.01
  10   2   6   -0.01    0.01
 -10   2  -6    0.00    0.01
 -11   2  -6    0.29    0.01
 -11   2  -6    0.27    0.01
  11   2   6    0.27    0.01
 -11   2  -6    0.29    0.01
 -12   2  -6    0.01    0.00
 -12   2  -6    0.01    0.00
 -12  -3   6    0.37    0.01
 -12   3   6    0.36    0.01
 -11  -3   6    0.01    0.01
 -11  -3   6    0.00    0.01
 -11  -3   6    0.01    0.01
 -11   3   6    0.00    0.01
 -11   3   6    0.01    0.01
 -10  -3   6    0.02    0.01
 -10  -3   6    0.02    0.01
 -10  -3   6    0.02    0.01
 -10   3   6    0.01    0.01
  10   3  -6    0.01    0.01
 -10   3   6    0.02    0.01
 -10   3   6    0.01    0.01
  -9  -3   6    0.01    0.01
  -9  -3   6    0.01    0.01
  -9   3   6    0.01    0.01
  -9   3   6    0.01    0.01
  -9   3   6    0.02    0.01
   9   3  -6    0.01    0.01
  -9   3   6    0.01    0.01
  -9   3   6    0.02    0.01
  -8  -3   6    0.46    0.02
  -8  -3   6    0.48    0.02
  -8   3   6    0.47    0.02
   8   3  -6    0.47    0.02
  -8   3   6    0.50    0.02
  -8   3   6    0.48    0.02
  -8   3   6    0.45    0.02
  -8   3   6    0.44    0.02
   7  -3  -6    2.00    0.05
   7  -3  -6    1.94    0.06
  -7  -3   6    2.01    0.05
   7  -3  -6    1.99    0.05
  -7   3   6    1.95    0.04
  -7   3   6    1.89    0.04
  -7   3   6    2.01    0.05
  -7   3   6    1.95    0.05
  -7   3   6    1.96    0.04
  -7   3   6    1.93    0.05
   7   3  -6    1.98    0.05
   7   3  -6    2.01    0.06
   6  -3  -6    1.62    0.04
   6  -3  -6    1.63    0.04
   6  -3  -6    1.62    0.05
   6  -3  -6    1.62    0.05
   6   3  -6    1.62    0.05
   5  -3  -6   17.88    0.39
   5  -3  -6   16.94    0.40
   5  -3  -6   17.65    0.37
   5  -3  -6   17.60    0.35
   5   3  -6   17.11    0.40
   4  -3  -6    0.01    0.00
   4  -3  -6    0.01    0.00
   4  -3  -6    0.01    0.01
   4  -3  -6    0.00    0.01
   4   3  -6    0.01    0.01
   3  -3  -6   18.86    0.39
   3  -3  -6   19.01    0.41
   3   3  -6   18.52    0.43
   3   3  -6   18.15    0.43
   2   3  -6   12.80    0.26
   2   3  -6   13.20    0.30
   2   3  -6   12.80    0.30
  -1  -3   6   13.74    0.29
   1   3  -6   13.95    0.32
   1   3  -6   13.83    0.28
   1   3  -6   13.27    0.31
   0  -3  -6    0.00    0.00
   0  -3  -6    0.00    0.00
   0  -3   6    0.00    0.00
   0  -3   6    0.00    0.01
   0   3  -6    0.00    0.01
   0   3  -6    0.00    0.01
   1  -3   6    1.02    0.03
  -1  -3  -6    1.11    0.03
   1  -3   6    1.04    0.03
  -1  -3  -6    1.06    0.02
   1  -3   6    1.01    0.03
  -1   3  -6    1.07    0.03
  -1   3  -6    1.02    0.03
  -2  -3  -6   12.76    0.25
   2  -3   6   12.34    0.25
  -2  -3  -6   12.39    0.26
   2  -3   6   12.26    0.26
   2  -3   6   12.41    0.27
  -2   3  -6   12.19    0.29
   2   3   6   12.30    0.27
  -3  -3  -6    0.04    0.01
   3  -3   6    0.05    0.01
   3  -3   6    0.04    0.01
  -3  -3  -6    0.04    0.01
   3  -3   6    0.05    0.01
  -3   3  -6    0.04    0.01
   3   3   6    0.05    0.01
  -4  -3  -6    2.01    0.05
   4  -3   6    1.98    0.05
  -4  -3  -6    1.98    0.05
   4  -3   6    2.03    0.05
  -4   3  -6    2.04    0.06
   4   3   6    2.03    0.05
  -5  -3  -6    2.28    0.06
   5  -3   6    2.28    0.06
  -5  -3  -6    2.22    0.05
   5  -3   6    2.21    0.06
  -5   3  -6    2.25    0.06
   5   3   6    2.26    0.06
   6  -3   6    0.23    0.02
   6  -3   6    0.23    0.02
   6   3   6    0.23    0.02
  -6   3  -6    0.21    0.02
   7  -3   6    0.90    0.03
  -7  -3  -6    0.89    0.03
   7  -3   6    0.90    0.03
   7  -3   6    0.85    0.03
   7   3   6    0.88    0.03
   7   3   6    0.90    0.03
   7   3   6    0.90    0.03
  -7   3  -6    0.92    0.03
  -7   3  -6    0.90    0.03
  -8  -3  -6    0.01    0.01
   8  -3   6    0.02    0.01
  -8   3  -6    0.02    0.01
   8   3   6    0.04    0.01
  -9  -3  -6    0.35    0.01
   9   3   6    0.37    0.02
  -9   3  -6    0.36    0.01
 -10   3  -6    0.14    0.01
 -10   3  -6    0.13    0.01
  10   3   6    0.17    0.01
 -10   3  -6    0.14    0.01
 -11   3  -6    0.13    0.01
 -11   3  -6    0.13    0.01
  11   3   6    0.15    0.01
 -11  -4   6    0.01    0.00
 -11  -4   6    0.01    0.01
 -11  -4   6    0.02    0.01
 -11  -4   6    0.02    0.01
 -11   4   6    0.03    0.01
 -11   4   6    0.02    0.01
 -10  -4   6    1.90    0.05
 -10  -4   6    2.03    0.04
 -10   4   6    2.02    0.04
 -10   4   6    2.04    0.04
 -10   4   6    2.01    0.04
 -10   4   6    2.04    0.04
 -10   4   6    1.90    0.05
  -9  -4   6    4.33    0.10
  -9  -4   6    4.41    0.09
  -9   4   6    4.51    0.09
  -9   4   6    4.29    0.09
  -9   4   6    4.50    0.09
  -9   4   6    4.39    0.09
  -9   4   6    4.43    0.09
   9   4  -6    4.41    0.09
  -9   4   6    4.33    0.09
  -8  -4   6    2.98    0.07
  -8   4   6    3.05    0.06
  -8   4   6    2.96    0.06
  -8   4   6    2.96    0.07
  -8   4   6    3.14    0.06
  -8   4   6    2.98    0.06
  -8   4   6    3.04    0.06
   8   4  -6    3.02    0.06
  -7  -4   6    0.10    0.01
  -7   4   6    0.13    0.01
  -7   4   6    0.15    0.01
  -7   4   6    0.12    0.01
  -7   4   6    0.14    0.01
   7   4  -6    0.13    0.01
  -7   4   6    0.12    0.01
  -7   4   6    0.11    0.01
  -6  -4   6    8.93    0.19
   6  -4  -6    9.50    0.19
   6  -4  -6    9.33    0.22
   6  -4  -6    9.30    0.21
   6  -4  -6    9.26    0.20
  -6   4   6    9.11    0.17
   6   4  -6    9.27    0.22
   6   4  -6    8.88    0.17
   5  -4  -6    8.08    0.18
   5  -4  -6    8.56    0.19
   5  -4  -6    8.40    0.17
   5  -4  -6    8.13    0.20
   5   4  -6    7.99    0.20
   4  -4  -6    3.78    0.09
   4  -4  -6    3.61    0.08
   4  -4  -6    3.62    0.09
   4   4  -6    3.61    0.09
   3  -4  -6    0.22    0.01
   3  -4  -6    0.21    0.01
   3   4  -6    0.21    0.02
   2  -4  -6    8.43    0.18
   2   4  -6    8.37    0.20
  -1  -4   6    7.41    0.16
   1   4  -6    7.16    0.17
   1   4  -6    7.46    0.17
   0  -4  -6    0.00    0.00
   0  -4   6    0.00    0.01
   0   4  -6    0.00    0.01
   0   4  -6    0.00    0.01
  -1  -4  -6    0.04    0.01
   1  -4   6    0.03    0.01
  -1  -4  -6    0.04    0.00
   1  -4   6    0.03    0.01
  -1   4  -6    0.04    0.01
  -1   4  -6    0.04    0.01
  -2  -4  -6    0.29    0.01
  -2  -4  -6    0.25    0.01
   2  -4   6    0.27    0.01
   2  -4   6    0.26    0.01
  -2   4  -6    0.28    0.02
  -3  -4  -6    0.37    0.01
  -3  -4  -6    0.41    0.02
   3  -4   6    0.34    0.02
   3  -4   6    0.37    0.02
   3  -4   6    0.38    0.02
   3   4   6    0.36    0.02
  -3   4  -6    0.35    0.02
   4  -4   6    0.54    0.02
  -4  -4  -6    0.57    0.02
  -4  -4  -6    0.55    0.02
   4  -4   6    0.57    0.02
  -4   4  -6    0.57    0.03
   4   4   6    0.59    0.02
   5  -4   6    0.24    0.02
  -5  -4  -6    0.21    0.02
  -5  -4  -6    0.24    0.01
   5  -4   6    0.23    0.02
  -5   4  -6    0.21    0.02
   5   4   6    0.23    0.01
   6  -4   6    0.02    0.01
   6  -4   6    0.01    0.01
   6  -4   6    0.01    0.01
  -6   4  -6    0.01    0.01
  -6   4  -6    0.04    0.01
   6   4   6    0.02    0.01
   6   4   6    0.02    0.01
   6   4   6    0.03    0.01
   6   4   6    0.04    0.01
  -6   4  -6    0.02    0.01
  -7  -4  -6    0.14    0.01
   7  -4   6    0.16    0.01
   7   4   6    0.15    0.01
   7   4   6    0.15    0.01
  -7   4  -6    0.15    0.01
  -7   4  -6    0.17    0.01
  -8  -4  -6    0.18    0.01
  -8   4  -6    0.17    0.01
   8   4   6    0.20    0.01
  -8   4  -6    0.18    0.01
  -9  -4  -6    0.01    0.01
  -9   4  -6    0.01    0.01
   9   4   6    0.00    0.01
  -9   4  -6    0.00    0.00
  -9   4  -6   -0.01    0.00
 -10  -4  -6    0.10    0.01
  10   4   6    0.09    0.01
  10   4   6    0.08    0.01
 -10   4  -6    0.08    0.01
 -10   4  -6    0.08    0.01
  11   4   6    0.00    0.00
 -11   4  -6    0.01    0.00
 -11   4  -6    0.00    0.00
 -11  -5   6    0.08    0.01
 -11  -5   6    0.06    0.01
 -11   5   6    0.07    0.01
 -11   5   6    0.07    0.01
 -10  -5   6    0.88    0.02
 -10  -5   6    0.82    0.03
 -10   5   6    0.84    0.02
 -10   5   6    0.85    0.02
 -10   5   6    0.79    0.02
 -10   5   6    0.87    0.02
 -10   5   6    0.83    0.02
  -9  -5   6    0.02    0.01
  -9   5   6    0.00    0.01
  -9   5   6    0.01    0.01
  -9   5   6    0.01    0.01
  -9   5   6    0.02    0.01
  -9   5   6    0.01    0.01
  -8  -5   6    2.48    0.06
  -8   5   6    2.54    0.05
  -8   5   6    2.59    0.05
  -8   5   6    2.53    0.06
  -8   5   6    2.58    0.06
  -8   5   6    2.58    0.06
  -8   5   6    2.55    0.06
  -7  -5   6   10.80    0.23
   7   5  -6   11.25    0.21
  -7   5   6   11.01    0.21
  -7   5   6   11.26    0.21
  -7   5   6   11.20    0.21
  -7   5   6   11.34    0.21
  -7   5   6   11.29    0.22
  -7   5   6   11.17    0.20
  -7   5   6   10.91    0.21
  -6  -5   6    4.22    0.09
   6  -5  -6    4.21    0.11
   6  -5  -6    4.02    0.11
  -6   5   6    4.18    0.09
  -6   5   6    4.17    0.09
  -6   5   6    4.18    0.08
  -6   5   6    4.14    0.08
   6   5  -6    4.19    0.08
  -6   5   6    4.13    0.09
  -6   5   6    4.21    0.08
  -6   5   6    4.18    0.08
  -5  -5   6    0.84    0.03
   5  -5  -6    0.86    0.03
   5  -5  -6    0.90    0.02
   5  -5  -6    0.85    0.02
   5  -5  -6    0.84    0.03
   5   5  -6    0.85    0.02
   5   5  -6    0.83    0.03
  -5   5   6    0.84    0.02
   4  -5  -6    0.40    0.02
   4  -5  -6    0.41    0.01
   4   5  -6    0.39    0.02
   3  -5  -6    1.18    0.03
   3  -5  -6    1.07    0.04
   3   5  -6    1.10    0.04
   2  -5  -6    0.25    0.01
   2  -5  -6    0.25    0.01
   2   5  -6    0.25    0.02
  -1  -5   6    2.25    0.05
   1  -5  -6    2.29    0.05
   1   5  -6    2.26    0.06
   0  -5   6    0.06    0.01
   0  -5   6    0.06    0.01
   0  -5  -6    0.06    0.00
   0  -5  -6    0.06    0.01
   0   5  -6    0.08    0.01
  -1  -5  -6    3.40    0.08
   1  -5   6    3.43    0.08
   1  -5   6    3.45    0.08
  -1  -5  -6    3.46    0.07
  -1   5  -6    3.51    0.09
   2  -5   6    0.04    0.01
  -2  -5  -6    0.05    0.01
   2  -5   6    0.05    0.01
  -2   5  -6    0.06    0.01
   3  -5   6    0.07    0.01
   3  -5   6    0.09    0.01
  -3  -5  -6    0.09    0.01
   3  -5   6    0.09    0.01
  -3  -5  -6    0.09    0.01
  -3   5  -6    0.09    0.01
   4  -5   6    1.49    0.04
   4  -5   6    1.52    0.04
  -4  -5  -6    1.51    0.04
  -4  -5  -6    1.55    0.04
  -4   5  -6    1.51    0.05
  -5  -5  -6    0.09    0.01
   5  -5   6    0.08    0.01
   5  -5   6    0.07    0.01
  -5  -5  -6    0.08    0.01
   5   5   6    0.07    0.01
   5   5   6    0.07    0.01
  -5   5  -6    0.07    0.01
   5   5   6    0.08    0.01
  -5   5  -6    0.09    0.01
   5   5   6    0.08    0.01
   5   5   6    0.10    0.01
  -5   5  -6    0.10    0.01
  -5   5  -6    0.09    0.01
   6   5   6    0.62    0.03
  -6   5  -6    0.60    0.02
  -6   5  -6    0.62    0.02
   6   5   6    0.63    0.02
   6   5   6    0.62    0.02
  -6   5  -6    0.66    0.03
   6   5   6    0.61    0.02
  -7  -5  -6    0.10    0.01
   7   5   6    0.10    0.01
  -7   5  -6    0.10    0.01
   7   5   6    0.11    0.01
  -7   5  -6    0.09    0.01
   7   5   6    0.09    0.01
  -7   5  -6    0.10    0.02
  -7   5  -6    0.09    0.01
  -8  -5  -6    0.04    0.01
  -8   5  -6    0.03    0.01
  -8   5  -6    0.04    0.01
   8   5   6    0.04    0.01
  -8   5  -6    0.03    0.00
  -8   5  -6    0.03    0.01
   8   5   6    0.04    0.01
  -9  -5  -6    0.53    0.02
  -9   5  -6    0.50    0.02
   9   5   6    0.51    0.02
  -9   5  -6    0.54    0.02
  -9   5  -6    0.51    0.01
 -10   5  -6    0.38    0.01
  10   5   6    0.41    0.01
 -10   5  -6    0.41    0.01
 -10   5  -6    0.41    0.01
 -10  -6   6    0.38    0.01
 -10  -6   6    0.38    0.01
 -10   6   6    0.39    0.01
 -10   6   6    0.38    0.01
  10   6  -6    0.33    0.01
 -10   6   6    0.36    0.01
 -10   6   6    0.37    0.01
 -10   6   6    0.37    0.01
  -9  -6   6    1.65    0.04
  -9   6   6    1.68    0.04
  -9   6   6    1.73    0.04
  -9   6   6    1.71    0.04
  -9   6   6    1.78    0.04
  -9   6   6    1.78    0.04
  -8  -6   6    0.29    0.02
  -8   6   6    0.29    0.02
  -8   6   6    0.27    0.01
  -8   6   6    0.27    0.02
  -8   6   6    0.27    0.01
  -8   6   6    0.31    0.02
  -7  -6   6    3.09    0.08
  -7   6   6    3.25    0.07
  -7   6   6    3.18    0.07
  -7   6   6    3.24    0.07
  -7   6   6    3.25    0.07
  -7   6   6    3.26    0.07
  -7   6   6    3.26    0.07
  -6  -6   6    3.45    0.08
  -6   6   6    3.62    0.08
  -6   6   6    3.62    0.07
  -6   6   6    3.55    0.07
  -6   6   6    3.49    0.07
  -6   6   6    3.48    0.07
  -6   6   6    3.44    0.08
  -5  -6   6    0.41    0.02
  -5   6   6    0.45    0.02
  -5   6   6    0.42    0.02
  -5   6   6    0.45    0.02
  -5   6   6    0.47    0.02
  -5   6   6    0.46    0.02
  -5   6   6    0.46    0.02
   4  -6  -6    2.27    0.05
   4  -6  -6    2.33    0.05
  -4  -6   6    2.34    0.06
   4  -6  -6    2.21    0.06
  -4   6   6    2.25    0.05
  -4   6   6    2.32    0.06
  -4   6   6    2.29    0.05
  -4   6   6    2.26    0.05
  -4   6   6    2.28    0.05
  -4   6   6    2.25    0.05
  -4   6   6    2.30    0.05
   4   6  -6    2.28    0.07
  -3  -6   6    1.94    0.05
   3  -6  -6    1.90    0.05
   3  -6  -6    1.96    0.05
   3   6  -6    2.05    0.06
   2  -6  -6    0.46    0.02
   2  -6  -6    0.49    0.01
   2   6  -6    0.47    0.03
   1  -6  -6    0.00    0.00
  -1  -6   6    0.01    0.01
   1  -6  -6    0.01    0.01
   1   6  -6    0.00    0.01
   0  -6   6    3.09    0.07
   0  -6  -6    2.95    0.07
   0  -6  -6    3.20    0.07
   0   6  -6    2.96    0.08
  -1  -6  -6    0.02    0.01
   1  -6   6    0.02    0.01
  -1  -6  -6    0.01    0.01
   2  -6   6    2.50    0.06
  -2  -6  -6    2.50    0.06
  -2  -6  -6    2.55    0.06
   2   6   6    2.44    0.05
  -3  -6  -6    2.90    0.07
  -3  -6  -6    2.97    0.07
  -3   6  -6    2.92    0.08
  -3   6  -6    2.88    0.06
  -3   6  -6    2.87    0.06
   3   6   6    2.91    0.06
  -4  -6  -6    1.18    0.03
   4  -6   6    1.16    0.04
  -4  -6  -6    1.16    0.04
  -4   6  -6    1.23    0.04
   4   6   6    1.18    0.03
  -4   6  -6    1.18    0.03
   4   6   6    1.18    0.03
  -4   6  -6    1.23    0.04
   4   6   6    1.22    0.04
  -4   6  -6    1.16    0.03
   4   6   6    1.18    0.02
  -4   6  -6    1.15    0.03
   4   6   6    1.19    0.03
  -4   6  -6    1.21    0.03
  -5   6  -6    0.43    0.01
   5   6   6    0.41    0.02
   5   6   6    0.42    0.01
  -5   6  -6    0.42    0.02
   5   6   6    0.42    0.02
  -5   6  -6    0.42    0.02
  -5   6  -6    0.42    0.02
   5   6   6    0.45    0.02
  -5   6  -6    0.45    0.02
  -6   6  -6    1.55    0.04
   6   6   6    1.62    0.04
  -6   6  -6    1.54    0.04
  -6   6  -6    1.65    0.03
  -6   6  -6    1.57    0.04
  -6   6  -6    1.66    0.04
   6   6   6    1.62    0.04
   6   6   6    1.57    0.03
  -7  -6  -6    0.93    0.03
  -7   6  -6    0.94    0.03
  -7   6  -6    0.91    0.02
  -7   6  -6    0.87    0.03
  -7   6  -6    0.92    0.03
   7   6   6    0.94    0.03
  -7   6  -6    0.93    0.03
   7   6   6    0.92    0.02
  -8  -6  -6    0.00    0.01
  -8   6  -6    0.00    0.01
  -8   6  -6    0.01    0.01
  -8   6  -6    0.00    0.00
   8   6   6    0.01    0.00
  -8   6  -6    0.00    0.01
  -8   6  -6    0.00    0.01
  -9  -6  -6    0.06    0.01
   9   6   6    0.05    0.00
  -9   6  -6    0.06    0.01
  -9   6  -6    0.06    0.01
  -9   6  -6    0.06    0.01
 -10   6  -6    0.08    0.01
 -10   6  -6    0.06    0.01
  -9  -7   6    0.00    0.00
   9   7  -6    0.01    0.00
  -9   7   6    0.01    0.01
  -9   7   6   -0.01    0.00
  -9   7   6    0.00    0.00
  -9   7   6    0.00    0.00
  -9   7   6    0.00    0.01
  -8  -7   6    0.03    0.01
  -8   7   6    0.03    0.01
  -8   7   6    0.02    0.01
  -8   7   6    0.04    0.01
   8   7  -6    0.05    0.01
  -8   7   6    0.03    0.01
  -8   7   6    0.03    0.01
  -8   7   6    0.02    0.01
  -7  -7   6    0.00    0.01
  -7   7   6    0.00    0.01
  -7   7   6    0.00    0.01
  -7   7   6    0.01    0.01
   7   7  -6    0.01    0.01
  -7   7   6    0.00    0.01
  -7   7   6   -0.01    0.01
  -7   7   6    0.00    0.01
  -6  -7   6    1.18    0.04
  -6   7   6    1.19    0.03
  -6   7   6    1.17    0.03
   6   7  -6    1.17    0.03
  -6   7   6    1.13    0.03
  -6   7   6    1.14    0.03
  -6   7   6    1.14    0.04
  -6   7   6    1.15    0.03
  -5  -7   6    0.36    0.02
  -5   7   6    0.37    0.02
   5   7  -6    0.36    0.02
  -5   7   6    0.38    0.02
  -5   7   6    0.38    0.02
  -5   7   6    0.36    0.02
  -5   7   6    0.36    0.02
  -5   7   6    0.38    0.02
  -5   7   6    0.36    0.02
  -4  -7   6    3.44    0.08
  -4   7   6    3.44    0.07
  -4   7   6    3.38    0.07
   4   7  -6    3.42    0.07
  -4   7   6    3.45    0.07
  -4   7   6    3.47    0.07
  -4   7   6    3.36    0.07
  -4   7   6    3.35    0.07
  -4   7   6    3.36    0.08
  -3  -7   6    1.86    0.05
  -3   7   6    1.77    0.04
   3   7  -6    1.81    0.04
  -3   7   6    1.71    0.04
  -3   7   6    1.69    0.04
  -3   7   6    1.75    0.04
  -3   7   6    1.76    0.04
  -3   7   6    1.76    0.04
   3   7  -6    1.75    0.04
   2  -7  -6    0.49    0.02
   2  -7  -6    0.46    0.02
   2  -7  -6    0.45    0.01
  -2  -7   6    0.50    0.02
  -2   7   6    0.48    0.02
   2   7  -6    0.46    0.02
  -2   7   6    0.46    0.02
  -2   7   6    0.50    0.02
  -2   7   6    0.46    0.02
   2   7  -6    0.49    0.02
   2   7  -6    0.48    0.02
  -2   7   6    0.48    0.02
  -2   7   6    0.49    0.02
  -2   7   6    0.51    0.02
   2   7  -6    0.49    0.03
   1  -7  -6    0.06    0.01
  -1  -7   6    0.06    0.01
   1  -7  -6    0.06    0.01
   1  -7  -6    0.06    0.01
  -1   7   6    0.04    0.01
   1   7  -6    0.05    0.01
   1   7  -6    0.08    0.01
  -1   7   6    0.07    0.01
   1   7  -6    0.06    0.01
   1   7  -6    0.08    0.01
  -1   7   6    0.07    0.01
  -1   7   6    0.05    0.01
  -1   7   6    0.06    0.01
  -1   7   6    0.06    0.01
   1   7  -6    0.05    0.01
   0  -7   6    7.48    0.16
   0  -7  -6    7.38    0.15
   0  -7  -6    7.29    0.16
   0  -7   6    7.56    0.15
   0  -7  -6    7.50    0.16
   0   7  -6    7.25    0.14
   0   7  -6    7.31    0.14
   0   7   6    7.52    0.14
   0   7   6    7.49    0.14
   0   7   6    7.23    0.14
   0   7   6    7.40    0.14
   0   7  -6    7.27    0.14
   0   7  -6    7.32    0.14
   1  -7   6    7.71    0.17
  -1  -7  -6    7.75    0.16
  -1  -7  -6    7.73    0.17
  -1  -7  -6    7.63    0.17
  -1   7  -6    7.63    0.15
  -1   7  -6    7.61    0.15
   1   7   6    7.73    0.15
  -1   7  -6    7.69    0.15
   1   7   6    7.77    0.14
   1   7   6    7.73    0.15
   1   7   6    7.74    0.15
  -1   7  -6    7.66    0.14
   1   7   6    7.74    0.15
   2  -7   6    0.11    0.01
  -2   7  -6    0.12    0.01
  -2   7  -6    0.13    0.01
   2   7   6    0.12    0.01
   2   7   6    0.10    0.01
  -2   7  -6    0.11    0.01
  -2   7  -6    0.11    0.01
   2   7   6    0.10    0.01
  -2   7  -6    0.11    0.01
  -2   7  -6    0.10    0.01
  -2   7  -6    0.11    0.01
   2   7   6    0.12    0.01
  -3   7  -6    4.52    0.09
  -3   7  -6    4.62    0.09
   3   7   6    4.58    0.09
  -3   7  -6    4.60    0.09
  -3   7  -6    4.43    0.09
  -3   7  -6    4.51    0.09
  -3   7  -6    4.49    0.10
   3   7   6    4.53    0.09
  -3   7  -6    4.53    0.09
   3   7   6    4.59    0.10
   3   7   6    4.59    0.09
  -4   7  -6    2.88    0.06
  -4   7  -6    2.90    0.06
   4   7   6    2.88    0.06
   4   7   6    2.84    0.06
  -4   7  -6    2.89    0.06
   4   7   6    2.89    0.07
  -4   7  -6    2.84    0.06
  -4   7  -6    2.94    0.07
  -4   7  -6    2.85    0.06
   4   7   6    2.89    0.07
  -4   7  -6    2.91    0.07
  -5   7  -6    0.05    0.01
  -5   7  -6    0.05    0.01
  -5   7  -6    0.04    0.01
  -5   7  -6    0.06    0.01
   5   7   6    0.04    0.01
   5   7   6    0.06    0.01
   5   7   6    0.06    0.01
  -5   7  -6    0.04    0.01
  -5   7  -6    0.05    0.01
  -6   7  -6    0.10    0.01
   6   7   6    0.08    0.01
  -6   7  -6    0.09    0.01
  -6   7  -6    0.11    0.01
  -6   7  -6    0.11    0.01
  -6   7  -6    0.11    0.01
   6   7   6    0.12    0.01
  -7  -7  -6    0.00    0.01
   7   7   6    0.00    0.01
  -7   7  -6    0.00    0.01
  -7   7  -6    0.00    0.00
  -7   7  -6    0.01    0.01
  -7   7  -6    0.01    0.01
  -7   7  -6   -0.01    0.00
  -8  -7  -6    0.08    0.01
  -8   7  -6    0.08    0.01
  -8   7  -6    0.08    0.01
  -9  -7  -6    0.00    0.00
  -9   7  -6    0.00    0.00
  -9   7  -6    0.00    0.00
  -8  -8   6    0.13    0.01
  -8   8   6    0.15    0.01
   8   8  -6    0.13    0.01
  -8   8   6    0.14    0.01
  -8   8   6    0.14    0.01
  -8   8   6    0.14    0.01
   8   8  -6    0.14    0.01
  -8   8   6    0.15    0.01
  -8   8   6    0.17    0.01
  -7  -8   6    0.04    0.01
  -7   8   6    0.05    0.01
  -7   8   6    0.05    0.01
  -7   8   6    0.03    0.01
  -7   8   6    0.05    0.01
  -7   8   6    0.04    0.01
   7   8  -6    0.05    0.01
  -7   8   6    0.06    0.01
  -6  -8   6    0.24    0.02
  -6   8   6    0.28    0.02
  -6   8   6    0.29    0.01
   6   8  -6    0.26    0.01
  -6   8   6    0.26    0.02
  -6   8   6    0.25    0.01
  -6   8   6    0.25    0.01
  -6   8   6    0.24    0.02
  -5  -8   6    0.94    0.03
  -5   8   6    0.93    0.03
  -5   8   6    0.96    0.03
  -5   8   6    0.90    0.03
  -5   8   6    0.92    0.03
   5   8  -6    0.95    0.02
  -5   8   6    0.94    0.03
  -5   8   6    0.95    0.03
  -5   8   6    0.92    0.03
  -4  -8   6    0.77    0.03
  -4   8   6    0.77    0.02
  -4   8   6    0.75    0.03
  -4   8   6    0.77    0.03
  -4   8   6    0.78    0.03
  -4   8   6    0.79    0.02
  -4   8   6    0.75    0.03
  -4   8   6    0.74    0.02
   4   8  -6    0.78    0.02
  -3  -8   6    2.92    0.07
  -3   8   6    3.00    0.07
   3   8  -6    3.12    0.06
  -3   8   6    3.09    0.06
   3   8  -6    3.10    0.07
  -3   8   6    3.00    0.07
  -3   8   6    2.95    0.07
  -3   8   6    3.08    0.07
  -3   8   6    3.08    0.07
  -2  -8   6   11.28    0.23
  -2   8   6   11.52    0.21
  -2   8   6   11.65    0.22
   2   8  -6   11.56    0.22
  -2   8   6   11.61    0.22
  -2   8   6   11.48    0.22
   2   8  -6   11.72    0.22
   2   8  -6   11.38    0.21
  -2   8   6   11.33    0.22
  -2   8   6   11.67    0.22
  -1  -8   6    1.85    0.05
  -1   8   6    1.86    0.04
   1   8  -6    1.90    0.04
  -1   8   6    1.89    0.05
  -1   8   6    1.87    0.05
   1   8  -6    1.88    0.04
   1   8  -6    1.92    0.05
   1   8  -6    1.97    0.05
  -1   8   6    1.86    0.05
  -1   8   6    1.86    0.04
   1   8  -6    1.82    0.04
   0  -8   6    0.00    0.01
   0   8   6   -0.02    0.01
   0   8  -6    0.01    0.01
   0   8  -6    0.02    0.01
   0   8   6    0.01    0.01
   0   8  -6   -0.01    0.01
   0   8   6    0.01    0.00
   0   8   6    0.01    0.01
   0   8   6    0.01    0.01
   0   8  -6    0.00    0.01
   0   8  -6    0.01    0.01
   0   8   6    0.02    0.01
   0   8  -6    0.02    0.01
   1  -8   6    0.00    0.01
   1   8   6   -0.01    0.01
   1   8   6   -0.01    0.01
  -1   8  -6    0.00    0.01
  -1   8  -6    0.01    0.00
   1   8   6    0.01    0.01
  -1   8  -6    0.00    0.01
  -1   8  -6    0.01    0.01
  -1   8  -6    0.00    0.01
   1   8   6    0.01    0.01
  -1   8  -6    0.01    0.01
  -2   8  -6    0.55    0.02
  -2   8  -6    0.53    0.02
  -2   8  -6    0.57    0.02
   2   8   6    0.55    0.02
   2   8   6    0.55    0.02
   2   8   6    0.54    0.02
  -2   8  -6    0.53    0.02
   2   8   6    0.52    0.02
  -2   8  -6    0.51    0.02
   2   8   6    0.51    0.02
   3   8   6    0.54    0.02
  -3   8  -6    0.53    0.02
   3   8   6    0.53    0.02
  -3   8  -6    0.49    0.02
  -3   8  -6    0.51    0.02
   3   8   6    0.51    0.02
  -3   8  -6    0.52    0.02
  -3   8  -6    0.52    0.02
   3   8   6    0.52    0.02
  -3   8  -6    0.53    0.02
  -4   8  -6    0.04    0.00
   4   8   6    0.04    0.01
  -4   8  -6    0.06    0.01
  -4   8  -6    0.04    0.01
  -4   8  -6    0.04    0.01
   4   8   6    0.02    0.01
  -4   8  -6    0.05    0.01
  -4   8  -6    0.04    0.01
   4   8   6    0.04    0.01
   4   8   6    0.05    0.01
   5   8   6    0.11    0.01
  -5   8  -6    0.10    0.01
  -5   8  -6    0.13    0.01
   5   8   6    0.12    0.01
  -5   8  -6    0.10    0.01
  -5   8  -6    0.10    0.01
  -5   8  -6    0.09    0.01
   5   8   6    0.12    0.01
  -5   8  -6    0.11    0.01
  -6   8  -6    0.01    0.01
   6   8   6    0.01    0.01
   6   8   6    0.00    0.01
  -6   8  -6    0.00    0.01
  -6   8  -6    0.00    0.01
  -6   8  -6    0.00    0.01
  -7  -8  -6    0.01    0.01
  -7   8  -6    0.00    0.01
  -7   8  -6    0.00    0.01
   7   8   6    0.00    0.01
  -7   8  -6    0.01    0.01
  -8  -8  -6    0.01    0.00
  -8   8  -6    0.00    0.00
  -8   8  -6    0.00    0.00
  -7   9   6    0.10    0.01
  -7   9   6    0.10    0.01
  -7   9   6    0.10    0.01
  -7   9   6    0.11    0.01
   7   9  -6    0.12    0.01
  -7   9   6    0.09    0.01
  -7   9   6    0.11    0.01
  -6  -9   6    0.03    0.01
   6   9  -6    0.05    0.01
  -6   9   6    0.04    0.01
  -6   9   6    0.05    0.01
  -6   9   6    0.05    0.01
  -6   9   6    0.04    0.01
  -6   9   6    0.05    0.01
  -6   9   6    0.05    0.01
  -5  -9   6    1.92    0.05
  -5   9   6    1.99    0.04
  -5   9   6    1.91    0.04
  -5   9   6    1.93    0.04
  -5   9   6    1.89    0.04
  -5   9   6    1.98    0.04
   5   9  -6    1.88    0.04
  -5   9   6    1.91    0.04
  -5   9   6    1.91    0.05
  -4  -9   6    0.10    0.01
  -4   9   6    0.09    0.01
  -4   9   6    0.09    0.01
  -4   9   6    0.11    0.01
  -4   9   6    0.09    0.01
  -4   9   6    0.07    0.01
  -4   9   6    0.10    0.01
   4   9  -6    0.10    0.01
  -3  -9   6    0.81    0.03
  -3   9   6    0.78    0.02
   3   9  -6    0.85    0.02
  -3   9   6    0.81    0.02
  -3   9   6    0.83    0.02
  -3   9   6    0.78    0.02
  -3   9   6    0.81    0.02
  -3   9   6    0.81    0.02
  -2  -9   6    0.04    0.01
  -2   9   6    0.04    0.01
  -2   9   6    0.04    0.01
  -2   9   6    0.04    0.01
  -2   9   6    0.05    0.01
  -2   9   6    0.05    0.01
   2   9  -6    0.04    0.01
   2   9  -6    0.06    0.01
  -2   9   6    0.03    0.01
   2   9  -6    0.04    0.01
  -1  -9   6    0.20    0.01
  -1   9   6    0.20    0.01
  -1   9   6    0.22    0.01
  -1   9   6    0.18    0.01
  -1   9   6    0.22    0.01
   1   9  -6    0.20    0.01
   1   9  -6    0.21    0.01
   1   9  -6    0.20    0.01
  -1   9   6    0.18    0.01
   0  -9   6    0.02    0.01
   0   9   6    0.02    0.01
   0   9  -6    0.03    0.01
   0   9   6    0.03    0.01
   0   9   6    0.02    0.01
   0   9   6    0.02    0.01
   0   9  -6    0.02    0.01
   0   9   6    0.02    0.00
   0   9  -6    0.03    0.01
   1  -9   6    0.04    0.01
  -1   9  -6    0.05    0.01
   1   9   6    0.06    0.01
   1   9   6    0.05    0.01
   1   9   6    0.05    0.01
  -1   9  -6    0.05    0.01
   1   9   6    0.05    0.01
   1   9   6    0.06    0.01
  -1   9  -6    0.04    0.01
  -1   9  -6    0.05    0.01
   2  -9   6    0.75    0.03
  -2   9  -6    0.75    0.02
   2   9   6    0.72    0.02
  -2   9  -6    0.76    0.02
  -2   9  -6    0.74    0.02
   2   9   6    0.73    0.02
   2   9   6    0.77    0.03
   2   9   6    0.80    0.02
  -2   9  -6    0.73    0.02
  -2   9  -6    0.78    0.02
   2   9   6    0.73    0.02
   3  -9   6    0.25    0.01
  -3   9  -6    0.28    0.01
   3   9   6    0.26    0.01
   3   9   6    0.24    0.01
   3   9   6    0.25    0.02
  -3   9  -6    0.24    0.01
  -3   9  -6    0.24    0.01
  -3   9  -6    0.26    0.02
   3   9   6    0.25    0.02
   4  -9   6    0.19    0.01
   4   9   6    0.22    0.01
   4   9   6    0.20    0.01
  -4   9  -6    0.21    0.01
   4   9   6    0.24    0.01
  -4   9  -6    0.20    0.01
  -4   9  -6    0.19    0.01
  -4   9  -6    0.21    0.01
   5   9   6    0.27    0.01
  -5   9  -6    0.30    0.01
   5   9   6    0.29    0.01
  -5   9  -6    0.29    0.01
  -5   9  -6    0.28    0.01
  -5   9  -6    0.33    0.02
   5   9   6    0.31    0.02
   6  -9   6    0.15    0.01
   6   9   6    0.13    0.01
  -6   9  -6    0.11    0.01
  -6   9  -6    0.14    0.01
  -6   9  -6    0.15    0.01
   7  -9   6    0.10    0.01
  -7   9  -6    0.09    0.01
  -7   9  -6    0.10    0.01
  -5  10   6    0.00    0.01
  -5  10   6    0.00    0.00
  -5  10   6    0.00    0.00
  -5  10   6    0.01    0.01
  -5  10   6    0.00    0.00
  -5  10   6    0.00    0.00
  -5  10   6    0.00    0.01
  -4 -10   6    0.01    0.01
  -4  10   6    0.01    0.01
  -4  10   6    0.01    0.01
  -4  10   6    0.01    0.00
  -4  10   6    0.01    0.01
  -4  10   6    0.02    0.01
  -4  10   6    0.01    0.01
  -4  10   6    0.01    0.00
  -3 -10   6    0.02    0.01
  -3  10   6    0.03    0.01
  -3  10   6    0.02    0.01
  -3  10   6    0.02    0.01
  -3  10   6    0.02    0.00
  -3  10   6    0.04    0.01
  -3  10   6    0.02    0.01
  -3  10   6    0.02    0.01
  -2  10   6    0.63    0.02
  -2  10   6    0.61    0.02
  -2  10   6    0.57    0.02
  -2  10   6    0.62    0.02
  -2  10   6    0.57    0.02
  -2  10   6    0.58    0.01
  -1 -10   6    0.02    0.01
  -1  10   6    0.03    0.01
   1  10  -6    0.03    0.01
  -1  10   6    0.02    0.01
   1  10  -6    0.02    0.01
  -1  10   6    0.02    0.01
  -1  10   6    0.02    0.00
  -1  10   6    0.02    0.01
   0 -10   6    0.19    0.01
   0  10  -6    0.16    0.01
   0  10   6    0.18    0.01
   0  10   6    0.20    0.01
   0  10   6    0.17    0.01
   0  10   6    0.18    0.01
   0  10  -6    0.17    0.01
   0  10   6    0.18    0.01
   1 -10   6    0.02    0.01
   1  10   6    0.01    0.00
   1  10   6    0.01    0.01
   1  10   6    0.01    0.01
  -1  10  -6    0.01    0.01
  -1  10  -6    0.00    0.01
   1  10   6    0.01    0.00
   1  10   6    0.01    0.01
   2 -10   6    0.01    0.01
  -2  10  -6    0.02    0.01
   2  10   6    0.01    0.00
  -2  10  -6    0.02    0.01
   2  10   6    0.01    0.01
   2  10   6    0.01    0.01
  -2  10  -6    0.00    0.01
  -2  10  -6    0.00    0.01
   2  10   6    0.01    0.01
   2  10   6    0.01    0.01
   3 -10   6    0.03    0.01
   3  10   6    0.02    0.01
  -3  10  -6    0.04    0.01
  -3  10  -6    0.04    0.01
  -3  10  -6    0.03    0.01
  -3  10  -6    0.03    0.00
   3  10   6    0.03    0.01
   3  10   6    0.02    0.01
   3  10   6    0.02    0.01
   4 -10   6    0.29    0.01
  -4  10  -6    0.27    0.01
   4  10   6    0.27    0.01
  -4  10  -6    0.26    0.01
  -4  10  -6    0.26    0.01
  -4  10  -6    0.30    0.01
   4  10   6    0.26    0.01
   4  10   6    0.29    0.01
   5 -10   6    0.02    0.00
   5  10   6    0.01    0.01
  -5  10  -6    0.01    0.00
  -5  10  -6    0.01    0.00
  -5  10  -6    0.01    0.01
   5  10   6    0.03    0.01
  -2  11   6    0.08    0.01
  -2  11   6    0.08    0.01
  -2  11   6    0.08    0.01
  -2  11   6    0.08    0.01
  -1  11   6    0.01    0.01
  -1  11   6    0.01    0.00
  -1  11   6    0.01    0.00
  -1  11   6    0.01    0.00
  -1  11   6    0.01    0.00
   0 -11   6    0.11    0.01
   0  11   6    0.11    0.01
   0  11   6    0.10    0.01
   0  11   6    0.10    0.01
   0  11   6    0.09    0.01
   0  11   6    0.11    0.01
   1 -11   6    0.03    0.00
   1  11   6    0.03    0.01
  -1  11  -6    0.02    0.01
   1  11   6    0.02    0.00
   1  11   6    0.02    0.00
   1  11   6    0.03    0.01
   2  11   6    0.02    0.00
 -12   0   7    0.01    0.00
 -12   0   7    0.00    0.00
  12   0  -7    0.01    0.01
 -11   0   7    0.58    0.02
  11   0  -7    0.59    0.02
 -11   0   7    0.57    0.02
 -11   0   7    0.59    0.02
 -10   0   7    0.00    0.00
 -10   0   7   -0.01    0.01
  10   0  -7    0.00    0.01
 -10   0   7   -0.01    0.01
 -10   0   7    0.00    0.01
  -9   0   7   29.54    0.54
  -9   0   7   28.68    0.52
  -9   0   7   29.17    0.53
  -9   0   7   29.48    0.57
  -8   0   7    0.00    0.01
  -8   0   7    0.00    0.00
  -8   0   7    0.00    0.01
  -8   0   7   -0.01    0.01
   8   0  -7    0.00    0.01
   8   0  -7    0.00    0.01
  -8   0   7    0.00    0.01
   7   0  -7    0.98    0.03
  -7   0   7    0.93    0.02
   7   0  -7    0.96    0.03
   7   0  -7    0.95    0.03
   6   0  -7    0.02    0.01
   6   0  -7    0.01    0.01
   6   0  -7    0.01    0.01
   5   0  -7    2.65    0.06
   5   0  -7    2.60    0.06
   5   0  -7    2.62    0.07
   4   0  -7    0.00    0.01
   4   0  -7    0.00    0.01
   4   0  -7    0.00    0.00
   3   0  -7    5.62    0.14
   3   0  -7    5.85    0.12
   3   0  -7    5.85    0.12
   2   0  -7   -0.02    0.01
   2   0  -7    0.00    0.01
   2   0  -7    0.00    0.00
   2   0  -7    0.00    0.00
  -1   0   7   42.31    0.96
   1   0  -7   42.49    1.00
   1   0  -7   45.20    1.03
   1   0  -7   44.70    0.93
   1   0  -7   45.64    0.90
   0   0  -7    0.00    0.00
   0   0  -7    0.00    0.01
   0   0   7    0.01    0.00
   0   0  -7    0.00    0.01
  -1   0  -7    0.25    0.01
   1   0   7    0.28    0.01
  -1   0  -7    0.26    0.02
  -1   0  -7    0.25    0.01
  -2   0  -7   -0.01    0.01
   2   0   7    0.00    0.00
   2   0   7    0.00    0.01
  -2   0  -7   -0.01    0.01
  -2   0  -7    0.00    0.01
  -3   0  -7   17.63    0.40
  -3   0  -7   17.36    0.35
   3   0   7   17.47    0.36
  -3   0  -7   16.95    0.37
   3   0   7   17.40    0.38
   4   0   7    0.01    0.01
  -4   0  -7    0.00    0.01
   4   0   7    0.01    0.01
  -4   0  -7    0.02    0.01
  -4   0  -7    0.00    0.01
   5   0   7   29.22    0.64
   5   0   7   28.87    0.61
  -5   0  -7   29.28    0.67
   6   0   7    0.00    0.01
   6   0   7    0.00    0.01
  -7   0  -7    4.55    0.09
   7   0   7    4.51    0.10
   7   0   7    4.52    0.11
  -8   0  -7    0.00    0.01
 -11   0  -7    0.70    0.02
 -12   0  -7    0.00    0.00
  12  -1  -7    1.82    0.04
 -12  -1   7    1.83    0.04
 -12   1   7    1.87    0.04
  12   1  -7    1.81    0.04
 -11  -1   7    0.07    0.01
 -11  -1   7    0.08    0.01
  11  -1  -7    0.08    0.01
 -11  -1   7    0.08    0.01
 -11  -1   7    0.10    0.01
 -11   1   7    0.07    0.01
  11   1  -7    0.08    0.01
 -11   1   7    0.08    0.01
 -10  -1   7    0.07    0.01
 -10  -1   7    0.05    0.01
 -10  -1   7    0.06    0.01
 -10  -1   7    0.05    0.01
 -10   1   7    0.04    0.01
 -10   1   7    0.05    0.01
 -10   1   7    0.06    0.01
  10   1  -7    0.09    0.01
  -9  -1   7    1.97    0.05
  -9  -1   7    1.95    0.05
  -9  -1   7    1.93    0.04
  -9  -1   7    1.92    0.04
  -9   1   7    1.87    0.04
   9   1  -7    1.92    0.04
  -9   1   7    1.87    0.04
  -9   1   7    1.88    0.04
  -9   1   7    1.82    0.05
  -9   1   7    1.90    0.05
  -9   1   7    1.80    0.04
  -8  -1   7    0.00    0.01
  -8  -1   7    0.01    0.01
  -8  -1   7    0.01    0.01
  -8   1   7    0.00    0.01
  -8   1   7    0.00    0.01
  -8   1   7    0.03    0.01
  -8   1   7    0.01    0.01
  -8   1   7    0.01    0.00
   8   1  -7    0.01    0.01
  -8   1   7    0.02    0.01
  -7  -1   7    6.68    0.14
  -7  -1   7    6.73    0.13
   7  -1  -7    7.05    0.17
   7  -1  -7    6.75    0.15
   7  -1  -7    6.88    0.14
   7   1  -7    6.69    0.17
   7   1  -7    6.83    0.14
  -7   1   7    6.69    0.13
   7   1  -7    6.85    0.17
   7   1  -7    6.61    0.15
   6  -1  -7   10.48    0.23
   6  -1  -7   10.76    0.22
   6  -1  -7   10.56    0.25
   6   1  -7   10.93    0.22
   6   1  -7   10.55    0.25
   6   1  -7   10.89    0.23
   5  -1  -7    7.78    0.17
   5  -1  -7    7.68    0.16
   5  -1  -7    7.91    0.19
   5   1  -7    8.01    0.17
   5   1  -7    7.94    0.19
   5   1  -7    7.79    0.19
   5   1  -7    7.89    0.16
   4  -1  -7    6.66    0.14
   4  -1  -7    6.83    0.14
   4  -1  -7    6.63    0.16
   4   1  -7    6.54    0.14
   4   1  -7    6.98    0.16
   4   1  -7    6.53    0.16
   4   1  -7    6.55    0.14
   3  -1  -7   55.52    1.27
   3  -1  -7   55.43    1.13
   3  -1  -7   57.68    1.18
   3   1  -7   56.07    1.18
   3   1  -7   53.95    1.27
   3   1  -7   56.53    1.14
   3   1  -7   54.92    1.29
   2  -1  -7    0.56    0.01
   2  -1  -7    0.54    0.02
   2  -1  -7    0.55    0.01
   2   1  -7    0.53    0.02
   2   1  -7    0.56    0.02
   2   1  -7    0.53    0.02
   2   1  -7    0.54    0.02
   1  -1  -7   15.42    0.35
  -1  -1   7   14.76    0.31
   1  -1  -7   14.42    0.35
   1  -1  -7   16.03    0.32
   1  -1  -7   15.12    0.31
   1   1  -7   15.70    0.31
   1   1  -7   14.96    0.35
   1   1  -7   14.99    0.32
   1   1  -7   15.39    0.35
   0  -1  -7   12.91    0.29
   0  -1  -7   13.33    0.27
   0  -1  -7   12.77    0.26
   0  -1   7   12.34    0.26
   0   1  -7   12.76    0.26
   0   1  -7   11.86    0.29
   0   1   7   12.92    0.27
   0   1  -7   12.70    0.27
   0   1  -7   12.94    0.30
  -1  -1  -7   45.02    0.91
  -1  -1  -7   45.35    0.95
   1  -1   7   45.00    0.93
  -1  -1  -7   44.66    1.04
  -1   1  -7   46.91    1.04
  -1   1  -7   43.84    0.92
   1   1   7   43.30    0.97
  -1   1  -7   43.47    0.95
   1   1   7   45.20    0.93
  -2  -1  -7    2.50    0.06
   2  -1   7    2.55    0.06
  -2  -1  -7    2.58    0.06
  -2  -1  -7    2.51    0.06
   2   1   7    2.50    0.06
  -2   1  -7    2.53    0.06
  -2   1  -7    2.51    0.06
   2   1   7    2.54    0.06
  -2   1  -7    2.62    0.07
  -3  -1  -7   34.76    0.80
   3  -1   7   34.98    0.72
  -3  -1  -7   34.63    0.74
  -3  -1  -7   35.10    0.71
   3  -1   7   34.92    0.76
  -3   1  -7   36.54    0.80
   3   1   7   34.53    0.76
   3   1   7   34.60    0.72
  -3   1  -7   34.30    0.71
  -3   1  -7   34.62    0.73
   4  -1   7    6.72    0.15
   4  -1   7    6.82    0.15
  -4  -1  -7    6.79    0.14
  -4  -1  -7    6.81    0.15
   4   1   7    6.80    0.15
   4   1   7    6.89    0.15
  -4   1  -7    6.84    0.16
   5  -1   7    2.57    0.06
   5  -1   7    2.61    0.06
  -5  -1  -7    2.63    0.06
   5   1   7    2.60    0.06
   5   1   7    2.56    0.06
  -5   1  -7    2.69    0.07
   6  -1   7    0.44    0.02
   6  -1   7    0.44    0.02
   6   1   7    0.46    0.02
   6   1   7    0.46    0.02
  -6   1  -7    0.47    0.02
   7  -1   7    0.01    0.01
   7  -1   7    0.02    0.01
  -7  -1  -7    0.00    0.01
   7  -1   7    0.01    0.01
  -7   1  -7    0.00    0.01
   7   1   7    0.00    0.01
  -7   1  -7    0.01    0.01
   7   1   7    0.01    0.01
  -8  -1  -7    0.01    0.01
  -9  -1  -7    0.12    0.01
 -10   1  -7    0.25    0.01
  11   1   7    0.26    0.01
 -11   1  -7    0.30    0.01
 -12   1  -7    0.00    0.00
 -12  -2   7    0.42    0.02
 -12  -2   7    0.43    0.01
 -12   2   7    0.44    0.01
 -12   2   7    0.41    0.01
 -11  -2   7    0.27    0.01
  11  -2  -7    0.23    0.01
 -11  -2   7    0.24    0.01
 -11  -2   7    0.25    0.01
 -11  -2   7    0.21    0.01
  11   2  -7    0.22    0.01
 -11   2   7    0.24    0.01
 -11   2   7    0.24    0.01
 -10  -2   7    1.02    0.03
 -10  -2   7    1.00    0.03
 -10  -2   7    0.98    0.02
 -10  -2   7    1.01    0.03
  10   2  -7    1.05    0.03
 -10   2   7    1.00    0.03
 -10   2   7    1.00    0.03
 -10   2   7    0.97    0.03
  -9  -2   7    0.02    0.01
  -9  -2   7    0.01    0.01
  -9   2   7    0.01    0.01
   9   2  -7    0.03    0.01
  -9   2   7    0.02    0.01
  -9   2   7    0.02    0.01
  -9   2   7    0.01    0.01
  -9   2   7    0.01    0.01
  -8  -2   7    1.57    0.04
  -8  -2   7    1.60    0.04
  -8   2   7    1.60    0.04
  -8   2   7    1.62    0.04
   8   2  -7    1.55    0.04
  -8   2   7    1.55    0.04
  -8   2   7    1.61    0.04
  -8   2   7    1.61    0.04
  -8   2   7    1.58    0.04
  -7  -2   7    0.49    0.02
   7  -2  -7    0.48    0.02
   7  -2  -7    0.47    0.02
   7  -2  -7    0.48    0.02
  -7  -2   7    0.44    0.02
  -7   2   7    0.50    0.02
   7   2  -7    0.47    0.02
  -7   2   7    0.47    0.02
  -7   2   7    0.50    0.02
   7   2  -7    0.48    0.02
   6  -2  -7    0.05    0.01
   6  -2  -7    0.05    0.01
   6  -2  -7    0.06    0.01
   6   2  -7    0.05    0.01
   5  -2  -7    1.92    0.05
   5  -2  -7    1.97    0.06
   5  -2  -7    1.93    0.04
   5   2  -7    1.97    0.05
   5   2  -7    1.99    0.05
   5   2  -7    1.91    0.05
   5   2  -7    1.96    0.05
   4  -2  -7    0.30    0.01
   4  -2  -7    0.34    0.01
   4  -2  -7    0.28    0.02
   4   2  -7    0.29    0.01
   4   2  -7    0.31    0.02
   4   2  -7    0.27    0.01
   4   2  -7    0.28    0.01
   3  -2  -7   58.33    1.25
   3  -2  -7   58.30    1.34
   3   2  -7   57.00    1.35
   3   2  -7   58.98    1.23
   3   2  -7   57.75    1.19
   3   2  -7   60.74    1.34
   2  -2  -7   12.74    0.27
   2  -2  -7   12.68    0.29
   2   2  -7   12.69    0.29
   2   2  -7   12.56    0.30
   2   2  -7   12.91    0.26
   2   2  -7   12.82    0.27
   1  -2  -7    2.70    0.07
   1  -2  -7    2.50    0.06
   1  -2  -7    2.57    0.07
  -1  -2   7    2.67    0.06
   1  -2  -7    2.70    0.06
   1   2  -7    2.79    0.07
   1   2  -7    2.75    0.06
   1   2  -7    2.73    0.07
   1   2  -7    2.76    0.06
   0  -2  -7    0.68    0.02
   0  -2   7    0.67    0.02
   0  -2  -7    0.67    0.02
   0   2  -7    0.69    0.03
   0   2  -7    0.70    0.02
   0   2  -7    0.70    0.02
   0   2  -7    0.66    0.02
  -1  -2  -7   40.19    0.82
  -1  -2  -7   41.80    0.86
  -1  -2  -7   40.24    0.93
   1  -2   7   41.32    0.84
  -1   2  -7   41.08    0.85
  -1   2  -7   37.19    0.92
  -1   2  -7   41.36    0.93
  -1   2  -7   41.36    0.82
  -2  -2  -7   14.45    0.31
   2  -2   7   14.33    0.30
  -2  -2  -7   14.98    0.30
   2   2   7   14.49    0.32
  -2   2  -7   14.84    0.34
  -2   2  -7   14.04    0.30
  -3  -2  -7    1.16    0.03
   3  -2   7    1.24    0.03
  -3  -2  -7    1.16    0.03
   3   2   7    1.20    0.03
   3   2   7    1.18    0.03
  -3   2  -7    1.26    0.04
  -4  -2  -7    5.22    0.12
  -4  -2  -7    5.30    0.11
   4  -2   7    5.24    0.12
   4  -2   7    5.32    0.12
  -4   2  -7    5.31    0.13
   4   2   7    5.28    0.12
   4   2   7    5.19    0.12
  -5  -2  -7    3.71    0.09
   5  -2   7    3.65    0.09
   5  -2   7    3.79    0.09
  -5  -2  -7    3.70    0.08
  -5   2  -7    3.69    0.10
   5   2   7    3.83    0.09
   6  -2   7    0.75    0.03
   6  -2   7    0.77    0.03
  -6   2  -7    0.81    0.03
   6   2   7    0.84    0.03
   7  -2   7    0.06    0.01
   7  -2   7    0.07    0.01
  -7  -2  -7    0.07    0.01
   7  -2   7    0.07    0.01
   7   2   7    0.07    0.01
   7   2   7    0.07    0.01
  -7   2  -7    0.07    0.01
  -8  -2  -7    0.06    0.01
   8   2   7    0.06    0.01
  -9  -2  -7    0.04    0.01
   9   2   7    0.03    0.01
  -9   2  -7    0.04    0.01
 -10   2  -7    0.00    0.01
  10   2   7    0.00    0.01
 -11   2  -7    0.13    0.01
  11   2   7    0.13    0.01
 -11   2  -7    0.12    0.01
 -11  -3   7    1.02    0.03
 -11  -3   7    1.04    0.03
 -11  -3   7    0.99    0.02
 -11   3   7    0.93    0.02
 -11   3   7    0.90    0.02
  11   3  -7    0.96    0.02
 -11   3   7    0.99    0.02
 -10  -3   7    0.05    0.01
 -10  -3   7    0.06    0.01
 -10  -3   7    0.06    0.01
 -10  -3   7    0.04    0.01
 -10   3   7    0.05    0.01
 -10   3   7    0.06    0.01
 -10   3   7    0.06    0.01
 -10   3   7    0.06    0.01
  10   3  -7    0.06    0.01
  -9  -3   7    0.01    0.01
  -9  -3   7    0.02    0.01
  -9   3   7    0.00    0.01
  -9   3   7    0.00    0.01
  -9   3   7    0.01    0.01
  -9   3   7    0.00    0.01
  -9   3   7    0.01    0.01
   9   3  -7    0.00    0.01
  -8  -3   7    0.05    0.01
  -8  -3   7    0.04    0.01
  -8   3   7    0.05    0.01
  -8   3   7    0.04    0.01
  -8   3   7    0.02    0.01
  -8   3   7    0.04    0.01
  -8   3   7    0.04    0.01
   8   3  -7    0.04    0.01
  -7  -3   7    0.01    0.01
   7  -3  -7    0.02    0.01
  -7  -3   7    0.02    0.01
   7  -3  -7    0.03    0.01
   7  -3  -7    0.02    0.01
  -7   3   7    0.02    0.01
   7   3  -7    0.01    0.01
  -7   3   7    0.02    0.01
  -7   3   7    0.03    0.01
  -7   3   7    0.03    0.01
  -7   3   7    0.02    0.01
   7   3  -7    0.03    0.01
  -7   3   7    0.02    0.01
   6  -3  -7    5.04    0.11
   6  -3  -7    5.04    0.11
   6  -3  -7    5.13    0.13
  -6   3   7    5.04    0.10
   6   3  -7    5.20    0.13
   5  -3  -7    3.02    0.07
   5  -3  -7    3.11    0.07
   5  -3  -7    2.99    0.08
   5   3  -7    3.13    0.08
   4  -3  -7    0.04    0.00
   4  -3  -7    0.03    0.01
   4  -3  -7    0.02    0.01
   4  -3  -7    0.04    0.00
   4   3  -7    0.03    0.01
   3  -3  -7   14.19    0.30
   3  -3  -7   13.84    0.31
   3  -3  -7   14.42    0.33
   3   3  -7   14.24    0.33
   3   3  -7   14.27    0.33
   2   3  -7   28.97    0.66
   2   3  -7   29.16    0.59
   2   3  -7   28.86    0.67
   1  -3  -7   19.10    0.44
  -1  -3   7   18.78    0.40
   1   3  -7   19.20    0.44
   1   3  -7   19.29    0.39
   1   3  -7   19.26    0.44
   0  -3   7   17.71    0.36
   0  -3  -7   17.83    0.37
   0  -3  -7   16.64    0.40
   0   3  -7   17.54    0.41
   0   3  -7   17.76    0.40
   1  -3   7    7.03    0.15
  -1  -3  -7    7.29    0.15
  -1  -3  -7    7.43    0.15
  -1   3  -7    7.03    0.17
  -1   3  -7    7.15    0.17
   2  -3   7    2.75    0.07
  -2  -3  -7    2.98    0.06
  -2  -3  -7    2.87    0.07
  -2   3  -7    2.90    0.07
  -3  -3  -7    4.71    0.10
   3  -3   7    4.75    0.11
  -3  -3  -7    4.88    0.11
  -3   3  -7    4.76    0.12
   3   3   7    4.98    0.11
   4  -3   7    2.19    0.05
  -4  -3  -7    2.17    0.05
  -4  -3  -7    2.20    0.05
   4   3   7    2.17    0.05
  -4   3  -7    2.21    0.06
  -5  -3  -7    0.87    0.03
  -5  -3  -7    0.92    0.03
   5  -3   7    0.94    0.03
   5  -3   7    0.90    0.03
   5   3   7    0.89    0.03
  -5   3  -7    0.83    0.03
  -6  -3  -7    0.21    0.01
   6  -3   7    0.18    0.02
   6  -3   7    0.18    0.01
   6  -3   7    0.16    0.01
   6   3   7    0.22    0.01
  -6   3  -7    0.17    0.02
   6   3   7    0.20    0.01
  -7  -3  -7    0.01    0.01
   7   3   7    0.00    0.01
  -8  -3  -7    0.49    0.02
  -8   3  -7    0.49    0.02
   8   3   7    0.50    0.02
  -9  -3  -7    0.19    0.01
  -9   3  -7    0.19    0.01
  -9   3  -7    0.22    0.01
   9   3   7    0.20    0.01
 -10   3  -7    0.27    0.01
  10   3   7    0.26    0.01
 -10   3  -7    0.25    0.01
  11   3   7    0.06    0.01
  11   3   7    0.05    0.00
 -11   3  -7    0.05    0.01
 -11   3  -7    0.05    0.00
 -11  -4   7    1.45    0.03
 -11  -4   7    1.37    0.04
 -11  -4   7    1.46    0.03
 -11   4   7    1.46    0.03
 -11   4   7    1.39    0.03
 -10  -4   7    3.04    0.07
 -10  -4   7    3.08    0.06
 -10   4   7    3.06    0.06
 -10   4   7    3.03    0.06
 -10   4   7    2.97    0.06
 -10   4   7    3.15    0.06
 -10   4   7    3.03    0.07
  -9  -4   7    0.61    0.02
  -9  -4   7    0.64    0.02
  -9   4   7    0.63    0.02
  -9   4   7    0.60    0.02
  -9   4   7    0.66    0.02
   9   4  -7    0.63    0.02
  -9   4   7    0.64    0.02
  -9   4   7    0.63    0.02
  -8  -4   7    0.04    0.01
  -8  -4   7    0.03    0.01
  -8   4   7    0.02    0.01
   8   4  -7    0.03    0.01
  -8   4   7    0.04    0.01
  -8   4   7    0.04    0.01
  -8   4   7    0.05    0.01
  -8   4   7    0.02    0.01
  -7  -4   7    0.57    0.03
  -7   4   7    0.58    0.02
  -7   4   7    0.60    0.02
  -7   4   7    0.61    0.02
   7   4  -7    0.59    0.02
  -7   4   7    0.60    0.02
  -7   4   7    0.60    0.02
  -7   4   7    0.60    0.02
   6  -4  -7    3.15    0.07
   6  -4  -7    3.17    0.07
   6  -4  -7    3.21    0.09
  -6  -4   7    3.09    0.07
  -6   4   7    3.13    0.07
  -6   4   7    3.15    0.06
   6   4  -7    3.15    0.08
  -6   4   7    3.20    0.07
   6   4  -7    3.13    0.06
  -6   4   7    3.16    0.07
  -6   4   7    3.05    0.07
   5  -4  -7    5.60    0.14
   5  -4  -7    5.62    0.12
   5   4  -7    5.52    0.14
   4  -4  -7    7.73    0.18
   4  -4  -7    7.64    0.18
   4  -4  -7    7.65    0.16
   4   4  -7    7.58    0.18
   3  -4  -7    6.07    0.14
   3  -4  -7    6.29    0.13
   3   4  -7    6.05    0.15
   2   4  -7    1.84    0.05
  -1  -4   7    0.19    0.01
   1   4  -7    0.16    0.01
   1   4  -7    0.18    0.02
   0  -4  -7    0.09    0.01
   0  -4   7    0.08    0.01
   0   4  -7    0.09    0.01
   0   4  -7    0.10    0.01
  -1  -4  -7    0.06    0.01
  -1   4  -7    0.08    0.01
  -1   4  -7    0.08    0.01
  -2  -4  -7    0.01    0.01
  -2  -4  -7    0.01    0.01
   2  -4   7    0.01    0.01
  -2   4  -7    0.02    0.01
  -3  -4  -7    1.80    0.05
  -3  -4  -7    1.76    0.04
   3  -4   7    1.76    0.05
  -3   4  -7    1.75    0.05
   4  -4   7    0.16    0.01
  -4  -4  -7    0.15    0.01
  -4  -4  -7    0.14    0.01
   4   4   7    0.16    0.01
  -4   4  -7    0.18    0.02
   5  -4   7    0.32    0.02
  -5  -4  -7    0.32    0.02
  -5  -4  -7    0.35    0.02
  -5   4  -7    0.29    0.02
   5   4   7    0.30    0.02
   5   4   7    0.32    0.01
   6  -4   7    0.04    0.01
  -6   4  -7    0.05    0.01
   6   4   7    0.07    0.01
   6   4   7    0.06    0.01
   6   4   7    0.05    0.01
   6   4   7    0.04    0.01
  -6   4  -7    0.04    0.01
   6   4   7    0.06    0.01
  -6   4  -7    0.04    0.01
  -7  -4  -7    1.89    0.04
   7   4   7    1.83    0.04
   7   4   7    1.89    0.04
  -7   4  -7    1.90    0.04
   7   4   7    1.91    0.05
  -7   4  -7    1.90    0.04
  -8  -4  -7    0.05    0.01
  -8   4  -7    0.05    0.01
   8   4   7    0.06    0.01
   8   4   7    0.05    0.01
  -8   4  -7    0.05    0.01
  -9  -4  -7    0.30    0.01
  -9   4  -7    0.28    0.01
  -9   4  -7    0.25    0.01
   9   4   7    0.28    0.01
  -9   4  -7    0.28    0.01
   9   4   7    0.27    0.01
 -10  -4  -7    0.24    0.01
 -10   4  -7    0.23    0.01
  10   4   7    0.22    0.01
 -10   4  -7    0.22    0.01
 -11   4  -7    0.05    0.01
 -11   4  -7    0.05    0.01
  11   4   7    0.04    0.00
 -11  -5   7    0.26    0.01
 -11   5   7    0.27    0.01
 -11   5   7    0.27    0.01
 -10  -5   7    1.14    0.03
 -10  -5   7    1.20    0.03
 -10   5   7    1.13    0.03
 -10   5   7    1.18    0.03
 -10   5   7    1.19    0.03
 -10   5   7    1.17    0.03
  -9  -5   7    4.22    0.09
  -9  -5   7    4.00    0.09
  -9   5   7    4.30    0.08
  -9   5   7    4.35    0.09
  -9   5   7    4.17    0.08
  -9   5   7    4.18    0.09
  -9   5   7    4.36    0.08
  -9   5   7    4.44    0.09
  -8  -5   7    3.50    0.08
  -8   5   7    3.57    0.07
  -8   5   7    3.48    0.07
  -8   5   7    3.55    0.08
  -8   5   7    3.60    0.07
  -8   5   7    3.51    0.07
  -8   5   7    3.49    0.07
  -7  -5   7    2.11    0.06
  -7   5   7    2.22    0.05
  -7   5   7    2.15    0.05
   7   5  -7    2.18    0.05
  -7   5   7    2.16    0.05
  -7   5   7    2.11    0.05
  -7   5   7    2.20    0.05
  -7   5   7    2.12    0.05
  -7   5   7    2.19    0.05
  -6  -5   7    1.74    0.05
  -6   5   7    1.70    0.04
   6   5  -7    1.70    0.04
  -6   5   7    1.66    0.04
  -6   5   7    1.72    0.04
  -6   5   7    1.72    0.05
  -6   5   7    1.64    0.04
  -6   5   7    1.65    0.04
  -6   5   7    1.69    0.04
   5  -5  -7    0.09    0.01
  -5  -5   7    0.08    0.01
   5  -5  -7    0.08    0.01
   5  -5  -7    0.08    0.01
   5   5  -7    0.08    0.01
  -5   5   7    0.08    0.01
  -5   5   7    0.07    0.01
  -5   5   7    0.08    0.01
  -5   5   7    0.07    0.01
   5   5  -7    0.07    0.01
  -5   5   7    0.08    0.01
  -5   5   7    0.08    0.01
  -5   5   7    0.08    0.01
   4  -5  -7    0.59    0.03
   4  -5  -7    0.65    0.03
   4  -5  -7    0.63    0.02
   4   5  -7    0.61    0.03
   4   5  -7    0.61    0.02
   3  -5  -7    0.12    0.01
   3  -5  -7    0.12    0.01
   3   5  -7    0.10    0.01
   2  -5  -7    0.70    0.02
   2  -5  -7    0.71    0.02
   2   5  -7    0.64    0.03
   1  -5  -7    0.26    0.01
  -1  -5   7    0.25    0.01
   1   5  -7    0.22    0.02
   0  -5   7    1.47    0.04
   0  -5  -7    1.46    0.03
   0   5  -7    1.45    0.04
   1  -5   7    0.01    0.01
  -1  -5  -7    0.00    0.00
  -1  -5  -7    0.00    0.00
  -1   5  -7    0.01    0.01
  -2  -5  -7    0.78    0.02
   2  -5   7    0.78    0.03
  -2  -5  -7    0.81    0.02
  -2   5  -7    0.80    0.03
  -3  -5  -7    0.36    0.02
   3  -5   7    0.38    0.02
  -3  -5  -7    0.35    0.02
  -3   5  -7    0.36    0.02
   4  -5   7    0.44    0.02
  -4  -5  -7    0.42    0.02
  -4  -5  -7    0.45    0.02
   4   5   7    0.41    0.01
  -4   5  -7    0.42    0.02
  -4   5  -7    0.43    0.02
   5  -5   7    0.39    0.02
  -5  -5  -7    0.39    0.02
  -5  -5  -7    0.38    0.02
  -5   5  -7    0.39    0.02
   5   5   7    0.41    0.02
   5   5   7    0.39    0.02
   5   5   7    0.37    0.02
   5   5   7    0.40    0.01
   5   5   7    0.41    0.02
  -5   5  -7    0.39    0.02
  -5   5  -7    0.39    0.02
  -6   5  -7    1.62    0.04
   6   5   7    1.70    0.04
   6   5   7    1.70    0.05
   6   5   7    1.65    0.04
  -6   5  -7    1.66    0.04
  -6   5  -7    1.63    0.04
  -7  -5  -7    1.72    0.04
   7   5   7    1.78    0.05
   7   5   7    1.70    0.04
  -7   5  -7    1.82    0.05
  -7   5  -7    1.73    0.04
  -8  -5  -7    0.04    0.01
   8   5   7    0.05    0.01
  -8   5  -7    0.04    0.01
  -8   5  -7    0.04    0.01
  -8   5  -7    0.03    0.01
  -9  -5  -7    0.97    0.02
  -9   5  -7    0.93    0.02
  -9   5  -7    0.91    0.02
  -9   5  -7    0.92    0.02
   9   5   7    0.92    0.02
 -10  -5  -7    0.38    0.01
 -10   5  -7    0.39    0.01
  10   5   7    0.40    0.01
 -10   5  -7    0.37    0.01
 -10   5  -7    0.39    0.01
 -10   5  -7    0.38    0.01
 -10  -6   7    0.02    0.01
 -10  -6   7    0.01    0.00
 -10   6   7    0.00    0.01
 -10   6   7    0.01    0.00
 -10   6   7    0.01    0.01
 -10   6   7    0.01    0.00
  -9  -6   7    0.19    0.01
  -9  -6   7    0.21    0.01
  -9   6   7    0.22    0.01
  -9   6   7    0.25    0.01
  -9   6   7    0.21    0.01
  -9   6   7    0.20    0.01
  -9   6   7    0.20    0.01
  -8  -6   7    0.78    0.03
  -8   6   7    0.81    0.02
  -8   6   7    0.87    0.03
  -8   6   7    0.85    0.02
  -8   6   7    0.84    0.03
  -8   6   7    0.81    0.02
  -7  -6   7    1.95    0.05
  -7   6   7    1.94    0.05
  -7   6   7    1.99    0.05
  -7   6   7    1.96    0.05
  -7   6   7    1.91    0.04
  -7   6   7    1.96    0.05
  -7   6   7    1.94    0.05
  -6  -6   7    2.82    0.07
  -6   6   7    2.76    0.06
  -6   6   7    2.79    0.06
  -6   6   7    2.92    0.06
  -6   6   7    2.81    0.06
  -6   6   7    2.82    0.06
  -6   6   7    2.83    0.06
  -6   6   7    2.81    0.07
  -5  -6   7    0.07    0.01
  -5   6   7    0.07    0.01
  -5   6   7    0.07    0.01
  -5   6   7    0.06    0.01
  -5   6   7    0.07    0.01
  -5   6   7    0.06    0.01
  -5   6   7    0.07    0.01
  -5   6   7    0.08    0.01
   4  -6  -7    5.61    0.14
  -4  -6   7    5.89    0.12
   4  -6  -7    5.21    0.14
  -4   6   7    5.89    0.12
  -4   6   7    5.71    0.11
  -4   6   7    5.67    0.11
  -4   6   7    5.61    0.11
  -4   6   7    5.70    0.11
  -4   6   7    5.69    0.11
   4   6  -7    5.68    0.14
  -4   6   7    5.67    0.11
   3  -6  -7    3.43    0.09
   3  -6  -7    3.80    0.08
  -3  -6   7    3.80    0.08
   3   6  -7    3.78    0.10
  -3   6   7    3.79    0.08
  -3   6   7    3.71    0.08
  -3   6   7    3.71    0.08
  -3   6   7    3.71    0.08
   2  -6  -7    0.18    0.01
   2  -6  -7    0.17    0.01
  -2  -6   7    0.18    0.01
   2   6  -7    0.15    0.01
   1  -6  -7    0.16    0.01
   1  -6  -7    0.15    0.01
   1   6  -7    0.21    0.02
   0  -6  -7    0.05    0.01
   0  -6   7    0.07    0.01
   0  -6  -7    0.06    0.01
   0   6  -7    0.09    0.01
  -1  -6  -7    0.47    0.02
  -1  -6  -7    0.49    0.02
   1  -6   7    0.49    0.02
   1   6   7    0.49    0.01
  -2  -6  -7    0.03    0.01
  -2  -6  -7    0.02    0.01
   2  -6   7    0.03    0.01
   2   6   7    0.03    0.01
  -2   6  -7    0.02    0.01
  -2   6  -7    0.04    0.01
  -3  -6  -7    2.87    0.07
  -3  -6  -7    2.92    0.07
   3   6   7    2.89    0.06
  -3   6  -7    2.87    0.06
   3   6   7    2.97    0.06
   3   6   7    2.76    0.06
  -3   6  -7    2.83    0.06
  -3   6  -7    2.93    0.08
  -3   6  -7    2.82    0.07
   3   6   7    2.88    0.06
  -3   6  -7    2.88    0.06
  -4   6  -7    8.17    0.15
   4   6   7    8.16    0.16
   4   6   7    8.11    0.15
   4   6   7    8.26    0.16
  -4   6  -7    8.28    0.16
   4   6   7    7.99    0.16
  -4   6  -7    8.15    0.16
   5   6   7    0.06    0.01
   5   6   7    0.06    0.01
  -5   6  -7    0.07    0.01
   5   6   7    0.06    0.00
  -5   6  -7    0.05    0.01
  -5   6  -7    0.05    0.01
   5   6   7    0.06    0.01
  -5   6  -7    0.05    0.01
   5   6   7    0.05    0.01
  -6   6  -7    2.82    0.07
  -6   6  -7    2.88    0.06
  -6   6  -7    2.88    0.06
   6   6   7    3.01    0.07
  -6   6  -7    2.84    0.06
   6   6   7    2.88    0.06
   6   6   7    2.96    0.07
  -6   6  -7    2.90    0.06
  -7  -6  -7    1.64    0.04
  -7   6  -7    1.68    0.04
  -7   6  -7    1.63    0.03
  -7   6  -7    1.66    0.04
   7   6   7    1.67    0.04
  -7   6  -7    1.62    0.04
   7   6   7    1.62    0.03
  -8  -6  -7    0.00    0.01
   8   6   7    0.00    0.00
  -8   6  -7    0.00    0.00
  -8   6  -7    0.00    0.01
  -8   6  -7    0.00    0.01
  -9  -6  -7    0.18    0.01
  -9   6  -7    0.19    0.01
  -9   6  -7    0.19    0.01
  -9  -7   7    0.00    0.01
  -9  -7   7    0.00    0.01
  -9   7   7    0.00    0.00
   9   7  -7    0.00    0.00
  -9   7   7    0.01    0.00
  -9   7   7    0.00    0.01
  -9   7   7    0.00    0.01
  -9   7   7    0.00    0.01
  -8  -7   7    0.15    0.01
  -8   7   7    0.16    0.01
  -8   7   7    0.17    0.01
  -8   7   7    0.17    0.01
  -8   7   7    0.18    0.01
   8   7  -7    0.16    0.01
  -8   7   7    0.17    0.01
  -8   7   7    0.14    0.01
  -7  -7   7    0.02    0.01
  -7   7   7    0.00    0.01
   7   7  -7    0.01    0.01
  -7   7   7    0.00    0.01
  -7   7   7    0.00    0.01
  -7   7   7    0.00    0.01
  -7   7   7    0.01    0.01
  -7   7   7    0.00    0.01
  -6  -7   7    1.17    0.04
  -6   7   7    1.13    0.03
  -6   7   7    1.16    0.03
  -6   7   7    1.15    0.03
  -6   7   7    1.14    0.03
   6   7  -7    1.12    0.03
  -6   7   7    1.21    0.04
  -6   7   7    1.16    0.03
  -5  -7   7    1.79    0.05
  -5   7   7    1.85    0.05
   5   7  -7    1.67    0.04
  -5   7   7    1.79    0.04
  -5   7   7    1.80    0.04
  -5   7   7    1.84    0.04
  -5   7   7    1.84    0.04
  -5   7   7    1.84    0.05
  -4  -7   7    3.96    0.09
  -4   7   7    4.00    0.08
  -4   7   7    3.96    0.08
   4   7  -7    3.81    0.08
  -4   7   7    3.98    0.09
  -4   7   7    4.00    0.08
  -4   7   7    4.00    0.08
  -4   7   7    3.86    0.08
  -4   7   7    3.96    0.08
  -3  -7   7    3.32    0.08
  -3   7   7    3.37    0.07
   3   7  -7    3.35    0.07
  -3   7   7    3.48    0.07
  -3   7   7    3.43    0.07
  -3   7   7    3.39    0.07
  -3   7   7    3.31    0.07
  -3   7   7    3.28    0.07
  -3   7   7    3.39    0.07
   3   7  -7    3.31    0.07
  -2  -7   7    3.98    0.09
  -2   7   7    4.06    0.08
   2   7  -7    4.04    0.08
  -2   7   7    3.92    0.08
  -2   7   7    4.04    0.08
  -2   7   7    4.00    0.08
   2   7  -7    4.02    0.08
  -2   7   7    3.97    0.08
  -2   7   7    3.94    0.08
  -2   7   7    4.03    0.08
  -1  -7   7    4.09    0.09
   1  -7  -7    3.86    0.09
   1  -7  -7    3.87    0.08
   1  -7  -7    3.81    0.09
  -1   7   7    3.91    0.08
  -1   7   7    3.89    0.08
  -1   7   7    3.93    0.08
   1   7  -7    3.93    0.08
   1   7  -7    3.68    0.08
  -1   7   7    3.92    0.08
   1   7  -7    3.75    0.08
   1   7  -7    3.88    0.08
  -1   7   7    4.03    0.08
  -1   7   7    4.01    0.08
   0  -7  -7    0.68    0.02
   0  -7  -7    0.65    0.02
   0  -7   7    0.67    0.02
   0  -7  -7    0.64    0.03
   0  -7   7    0.67    0.02
   0   7  -7    0.60    0.02
   0   7   7    0.63    0.02
   0   7  -7    0.64    0.02
   0   7   7    0.66    0.02
   0   7   7    0.61    0.02
   0   7  -7    0.63    0.02
   0   7   7    0.64    0.02
   0   7   7    0.66    0.02
   1  -7   7    8.66    0.19
   1  -7   7    8.84    0.18
  -1   7  -7    8.84    0.16
  -1   7  -7    8.87    0.17
   1   7   7    8.79    0.17
  -1   7  -7    8.63    0.17
   1   7   7    8.78    0.16
   1   7   7    8.79    0.17
   1   7   7    8.87    0.17
  -2   7  -7    0.23    0.01
   2   7   7    0.28    0.02
   2   7   7    0.24    0.01
   2   7   7    0.22    0.02
   2   7   7    0.24    0.01
  -2   7  -7    0.22    0.01
  -2   7  -7    0.25    0.02
  -2   7  -7    0.22    0.02
   3   7   7    1.14    0.03
  -3   7  -7    1.18    0.03
  -3   7  -7    1.17    0.03
   3   7   7    1.17    0.03
  -3   7  -7    1.12    0.03
  -3   7  -7    1.19    0.03
  -3   7  -7    1.14    0.03
  -3   7  -7    1.12    0.03
   3   7   7    1.14    0.03
   3   7   7    1.14    0.03
  -3   7  -7    1.16    0.03
  -4   7  -7    1.72    0.04
  -4   7  -7    1.74    0.04
   4   7   7    1.76    0.05
  -4   7  -7    1.73    0.05
   4   7   7    1.73    0.04
   4   7   7    1.74    0.04
   4   7   7    1.76    0.04
  -4   7  -7    1.78    0.05
  -4   7  -7    1.74    0.04
  -4   7  -7    1.67    0.04
  -4   7  -7    1.74    0.04
  -5   7  -7    0.02    0.01
   5   7   7    0.02    0.01
   5   7   7    0.02    0.01
  -5   7  -7    0.02    0.01
  -5   7  -7    0.01    0.01
  -5   7  -7    0.02    0.00
  -5   7  -7    0.01    0.01
   5   7   7    0.03    0.01
  -5   7  -7    0.02    0.01
   5   7   7    0.02    0.01
  -6   7  -7    0.17    0.01
  -6   7  -7    0.15    0.01
  -6   7  -7    0.15    0.01
   6   7   7    0.16    0.01
  -6   7  -7    0.17    0.01
  -6   7  -7    0.16    0.01
   6   7   7    0.13    0.01
  -7  -7  -7    0.04    0.01
  -7   7  -7    0.02    0.01
  -7   7  -7    0.02    0.01
   7   7   7    0.02    0.01
  -7   7  -7    0.03    0.00
  -7   7  -7    0.03    0.01
  -8  -7  -7    0.13    0.01
  -8   7  -7    0.14    0.01
  -8   7  -7    0.10    0.01
  -9  -7  -7    0.00    0.00
  -9   7  -7    0.00    0.00
  -9   7  -7    0.00    0.00
  -8  -8   7    0.17    0.01
  -8   8   7    0.16    0.01
  -8   8   7    0.17    0.01
   8   8  -7    0.17    0.01
  -8   8   7    0.16    0.01
  -8   8   7    0.17    0.01
  -7  -8   7    0.03    0.01
  -7   8   7    0.04    0.01
  -7   8   7    0.02    0.01
  -7   8   7    0.04    0.01
  -7   8   7    0.04    0.01
  -7   8   7    0.02    0.01
   7   8  -7    0.03    0.01
  -7   8   7    0.04    0.01
  -6  -8   7    0.27    0.02
  -6   8   7    0.30    0.02
  -6   8   7    0.34    0.02
  -6   8   7    0.32    0.01
  -6   8   7    0.28    0.02
   6   8  -7    0.29    0.01
  -6   8   7    0.30    0.01
  -6   8   7    0.31    0.01
  -5  -8   7    2.73    0.07
  -5   8   7    2.72    0.06
  -5   8   7    2.71    0.06
  -5   8   7    2.81    0.06
  -5   8   7    2.73    0.06
  -5   8   7    2.73    0.06
  -5   8   7    2.76    0.06
   5   8  -7    2.82    0.06
  -5   8   7    2.79    0.06
  -4  -8   7    0.01    0.01
  -4   8   7    0.02    0.01
  -4   8   7    0.02    0.01
  -4   8   7    0.01    0.01
  -4   8   7    0.01    0.01
  -4   8   7    0.02    0.01
  -4   8   7    0.01    0.01
  -4   8   7    0.03    0.01
   4   8  -7    0.03    0.01
  -3  -8   7    0.90    0.03
  -3   8   7    0.88    0.03
  -3   8   7    0.86    0.03
  -3   8   7    0.91    0.03
  -3   8   7    0.89    0.03
  -3   8   7    0.89    0.03
  -3   8   7    0.91    0.03
   3   8  -7    0.89    0.02
  -2  -8   7    1.91    0.05
   2   8  -7    1.75    0.04
  -2   8   7    1.88    0.04
  -2   8   7    1.90    0.04
   2   8  -7    1.90    0.04
  -2   8   7    1.88    0.05
  -2   8   7    1.91    0.05
  -2   8   7    1.85    0.04
  -2   8   7    1.91    0.05
   2   8  -7    1.87    0.05
  -1  -8   7    3.72    0.08
  -1   8   7    3.71    0.08
  -1   8   7    3.80    0.08
  -1   8   7    3.76    0.08
   1   8  -7    3.86    0.08
   1   8  -7    3.84    0.08
  -1   8   7    3.86    0.08
   1   8  -7    3.81    0.08
  -1   8   7    3.81    0.08
   0  -8   7    6.07    0.13
   0   8  -7    6.03    0.12
   0   8   7    6.18    0.12
   0   8  -7    6.25    0.12
   0   8  -7    6.05    0.11
   0   8   7    6.01    0.12
   0   8   7    6.10    0.12
   0   8   7    6.06    0.12
   0   8  -7    6.01    0.12
   0   8  -7    5.92    0.12
   0   8   7    6.04    0.11
   1  -8   7    1.59    0.04
   1   8   7    1.68    0.04
  -1   8  -7    1.65    0.04
  -1   8  -7    1.73    0.04
  -1   8  -7    1.69    0.04
  -1   8  -7    1.63    0.04
   1   8   7    1.69    0.04
  -1   8  -7    1.72    0.04
   1   8   7    1.73    0.04
   1   8   7    1.61    0.04
   1   8   7    1.70    0.04
   2  -8   7    1.81    0.05
   2   8   7    1.81    0.04
  -2   8  -7    1.80    0.04
  -2   8  -7    1.78    0.04
  -2   8  -7    1.86    0.04
  -2   8  -7    1.85    0.04
   2   8   7    1.73    0.04
   2   8   7    1.78    0.04
  -2   8  -7    1.81    0.04
  -2   8  -7    1.77    0.04
   2   8   7    1.85    0.05
   3   8   7    0.77    0.02
  -3   8  -7    0.72    0.02
  -3   8  -7    0.75    0.02
   3   8   7    0.73    0.03
  -3   8  -7    0.73    0.02
   3   8   7    0.77    0.02
  -3   8  -7    0.75    0.03
  -3   8  -7    0.73    0.02
   3   8   7    0.76    0.03
  -4   8  -7    1.20    0.03
  -4   8  -7    1.28    0.03
   4   8   7    1.17    0.03
  -4   8  -7    1.23    0.03
   4   8   7    1.20    0.03
   4   8   7    1.22    0.03
  -4   8  -7    1.18    0.03
  -4   8  -7    1.20    0.03
   4   8   7    1.25    0.03
   5   8   7    0.12    0.01
  -5   8  -7    0.09    0.01
   5   8   7    0.11    0.01
  -5   8  -7    0.10    0.01
  -5   8  -7    0.11    0.01
  -5   8  -7    0.11    0.01
  -5   8  -7    0.10    0.01
   5   8   7    0.12    0.01
  -6   8  -7    0.00    0.01
  -6   8  -7    0.00    0.01
   6   8   7    0.00    0.01
   6   8   7    0.00    0.01
  -6   8  -7    0.00    0.01
  -7  -8  -7    0.00    0.00
  -7   8  -7    0.00    0.00
  -7   8  -7    0.00    0.00
  -7   8  -7    0.00    0.01
   7   8   7    0.01    0.01
  -8  -8  -7    0.02    0.00
  -8   8  -7    0.03    0.00
  -8   8  -7    0.02    0.00
   7   9  -7    0.09    0.01
  -7   9   7    0.07    0.01
  -7   9   7    0.08    0.01
  -7   9   7    0.07    0.01
  -7   9   7    0.09    0.01
  -7   9   7    0.08    0.01
  -7   9   7    0.09    0.01
  -6  -9   7    0.05    0.01
  -6   9   7    0.05    0.01
  -6   9   7    0.06    0.01
  -6   9   7    0.05    0.01
   6   9  -7    0.06    0.01
  -6   9   7    0.03    0.01
  -6   9   7    0.04    0.01
  -6   9   7    0.05    0.01
  -5  -9   7    3.00    0.07
  -5   9   7    3.05    0.07
  -5   9   7    3.16    0.06
  -5   9   7    3.13    0.06
   5   9  -7    3.13    0.06
  -5   9   7    3.34    0.07
  -5   9   7    3.09    0.06
  -5   9   7    3.15    0.06
  -5   9   7    3.15    0.06
  -4  -9   7    0.06    0.01
  -4   9   7    0.07    0.01
  -4   9   7    0.06    0.01
  -4   9   7    0.05    0.01
  -4   9   7    0.06    0.01
   4   9  -7    0.06    0.00
  -4   9   7    0.06    0.01
   4   9  -7    0.06    0.01
  -4   9   7    0.05    0.01
  -3  -9   7    0.03    0.01
  -3   9   7    0.02    0.01
  -3   9   7    0.01    0.01
   3   9  -7    0.03    0.01
  -3   9   7    0.01    0.01
  -3   9   7    0.03    0.01
  -3   9   7    0.02    0.01
   3   9  -7    0.02    0.00
  -3   9   7    0.03    0.01
  -2  -9   7    0.00    0.01
   2   9  -7    0.01    0.01
  -2   9   7    0.01    0.01
   2   9  -7    0.01    0.01
  -2   9   7    0.01    0.01
  -2   9   7    0.01    0.01
  -2   9   7    0.01    0.01
  -2   9   7    0.02    0.01
  -1  -9   7    0.02    0.01
  -1   9   7    0.02    0.01
  -1   9   7    0.02    0.01
   1   9  -7    0.01    0.01
   1   9  -7    0.03    0.01
   1   9  -7    0.03    0.01
  -1   9   7    0.02    0.00
  -1   9   7    0.00    0.01
  -1   9   7    0.02    0.01
   0  -9   7    0.29    0.02
   0   9   7    0.24    0.02
   0   9   7    0.25    0.01
   0   9  -7    0.28    0.02
   0   9   7    0.27    0.01
   0   9   7    0.29    0.02
   0   9  -7    0.26    0.01
   0   9   7    0.28    0.01
   1  -9   7    2.58    0.06
   1   9   7    2.55    0.06
  -1   9  -7    2.61    0.06
   1   9   7    2.62    0.06
  -1   9  -7    2.62    0.06
  -1   9  -7    2.55    0.06
   1   9   7    2.54    0.05
  -1   9  -7    2.61    0.05
   1   9   7    2.57    0.06
   1   9   7    2.54    0.06
   2  -9   7    0.20    0.02
  -2   9  -7    0.20    0.01
   2   9   7    0.19    0.01
   2   9   7    0.20    0.01
  -2   9  -7    0.20    0.01
  -2   9  -7    0.20    0.01
   2   9   7    0.21    0.01
  -2   9  -7    0.23    0.02
  -2   9  -7    0.22    0.01
   2   9   7    0.19    0.01
   3  -9   7    1.48    0.04
  -3   9  -7    1.46    0.04
   3   9   7    1.47    0.04
  -3   9  -7    1.46    0.04
  -3   9  -7    1.43    0.03
   3   9   7    1.46    0.03
   3   9   7    1.49    0.04
  -3   9  -7    1.49    0.03
  -3   9  -7    1.45    0.03
  -3   9  -7    1.51    0.04
   3   9   7    1.49    0.04
   4  -9   7    0.53    0.02
  -4   9  -7    0.57    0.02
   4   9   7    0.53    0.02
  -4   9  -7    0.55    0.02
  -4   9  -7    0.54    0.02
   4   9   7    0.53    0.02
   4   9   7    0.50    0.02
  -4   9  -7    0.50    0.02
   4   9   7    0.51    0.02
   5  -9   7    0.08    0.01
  -5   9  -7    0.09    0.01
   5   9   7    0.08    0.01
  -5   9  -7    0.08    0.01
   5   9   7    0.08    0.01
   5   9   7    0.09    0.01
  -5   9  -7    0.09    0.01
  -5   9  -7    0.08    0.01
  -6  -9  -7    0.44    0.01
   6  -9   7    0.45    0.01
   6   9   7    0.43    0.02
  -6   9  -7    0.43    0.01
  -6   9  -7    0.44    0.02
  -6   9  -7    0.43    0.01
  -7   9  -7    0.00    0.00
  -5  10   7    0.01    0.01
  -5  10   7    0.01    0.00
  -5  10   7    0.00    0.00
  -5  10   7    0.00    0.01
  -5  10   7    0.00    0.00
  -4 -10   7    0.01    0.00
  -4  10   7    0.00    0.01
  -4  10   7    0.00    0.00
  -4  10   7    0.01    0.00
  -4  10   7    0.00    0.00
  -4  10   7    0.02    0.01
  -4  10   7    0.00    0.00
  -3 -10   7    0.00    0.00
  -3  10   7    0.00    0.01
   3  10  -7    0.00    0.00
  -3  10   7    0.00    0.00
  -3  10   7    0.00    0.01
  -3  10   7    0.00    0.00
  -3  10   7    0.00    0.00
  -3  10   7    0.00    0.01
  -3  10   7    0.01    0.01
   3  10  -7    0.00    0.00
  -2 -10   7    0.00    0.01
  -2  10   7    0.01    0.01
  -2  10   7    0.01    0.01
  -2  10   7    0.01    0.01
  -2  10   7    0.01    0.00
  -2  10   7    0.00    0.00
  -2  10   7    0.01    0.01
  -1 -10   7    0.06    0.01
  -1  10   7    0.07    0.01
  -1  10   7    0.08    0.01
  -1  10   7    0.06    0.00
  -1  10   7    0.07    0.01
  -1  10   7    0.07    0.01
   0 -10   7    0.00    0.01
   0  10   7    0.00    0.00
   0  10  -7    0.00    0.01
   0  10   7    0.00    0.01
   0  10   7    0.00    0.01
   0  10   7    0.00    0.01
   0  10   7    0.01    0.01
   1 -10   7    0.14    0.01
   1  10   7    0.15    0.01
  -1  10  -7    0.12    0.01
   1  10   7    0.16    0.01
   1  10   7    0.15    0.01
   1  10   7    0.12    0.01
  -1  10  -7    0.15    0.01
   1  10   7    0.14    0.01
   2 -10   7    0.21    0.01
   2  10   7    0.23    0.01
   2  10   7    0.19    0.01
  -2  10  -7    0.19    0.01
   2  10   7    0.20    0.01
   2  10   7    0.20    0.01
  -2  10  -7    0.20    0.01
   3 -10   7    0.15    0.01
   3  10   7    0.14    0.01
   3  10   7    0.16    0.01
  -3  10  -7    0.13    0.01
  -3  10  -7    0.14    0.01
   3  10   7    0.14    0.01
  -3  10  -7    0.15    0.01
   3  10   7    0.14    0.01
   4 -10   7    0.15    0.01
  -4  10  -7    0.16    0.01
   4  10   7    0.14    0.01
   4  10   7    0.15    0.01
  -4  10  -7    0.15    0.01
  -4  10  -7    0.16    0.01
   4  10   7    0.15    0.01
   5  10   7    0.05    0.01
  -5  10  -7    0.03    0.00
  -5  10  -7    0.04    0.01
  -1  11   7    0.07    0.01
  -1  11   7    0.08    0.01
  -1  11   7    0.06    0.01
   0  11   7    0.04    0.01
   0  11   7    0.04    0.00
   0  11   7    0.05    0.01
   1  11   7    0.01    0.00
   1  11   7    0.01    0.01
 -12   0   8    0.19    0.01
  12   0  -8    0.19    0.01
 -11   0   8    0.00    0.01
 -11   0   8    0.00    0.01
 -11   0   8    0.01    0.01
  11   0  -8    0.00    0.01
 -10   0   8    0.47    0.02
 -10   0   8    0.48    0.02
 -10   0   8    0.51    0.02
  10   0  -8    0.44    0.02
  -9   0   8    0.00    0.00
  -9   0   8    0.00    0.01
  -9   0   8   -0.01    0.01
  -9   0   8    0.00    0.01
  -9   0   8    0.02    0.01
  -8   0   8    0.73    0.02
  -8   0   8    0.74    0.02
  -8   0   8    0.74    0.03
  -8   0   8    0.75    0.02
  -8   0   8    0.66    0.02
  -7   0   8    0.00    0.01
  -7   0   8    0.02    0.01
   7   0  -8    0.01    0.01
  -7   0   8    0.00    0.00
   7   0  -8    0.01    0.01
   7   0  -8    0.00    0.01
  -7   0   8   -0.01    0.01
   6   0  -8   32.10    0.74
   6   0  -8   32.07    0.68
   6   0  -8   32.60    0.66
   5   0  -8    0.00    0.01
   5   0  -8    0.00    0.01
   5   0  -8    0.01    0.00
   4   0  -8   60.03    1.36
   4   0  -8   59.51    1.20
   4   0  -8   57.85    1.24
   3   0  -8   -0.01    0.00
   3   0  -8   -0.01    0.01
   3   0  -8   -0.01    0.01
   3   0  -8    0.00    0.01
   2   0  -8   65.56    1.31
   2   0  -8   64.48    1.49
   2   0  -8   62.95    1.58
   2   0  -8   64.22    1.35
   1   0  -8   -0.03    0.01
  -1   0   8   -0.04    0.00
   1   0  -8   -0.03    0.00
   1   0  -8   -0.03    0.00
   1   0  -8   -0.04    0.01
   0   0   8    5.89    0.13
   0   0  -8    5.91    0.13
   0   0  -8    6.13    0.12
   0   0  -8    6.08    0.14
   1   0   8   -0.03    0.01
  -1   0  -8   -0.03    0.01
  -1   0  -8   -0.03    0.01
  -2   0  -8    2.67    0.07
  -2   0  -8    2.58    0.06
  -2   0  -8    2.70    0.06
   2   0   8    2.65    0.06
  -3   0  -8    0.00    0.01
  -3   0  -8   -0.01    0.01
  -3   0  -8    0.00    0.01
   3   0   8    0.00    0.01
  -4   0  -8   23.69    0.49
   4   0   8   23.77    0.50
  -4   0  -8   23.20    0.51
  -4   0  -8   24.98    0.55
   5   0   8   -0.01    0.01
   5   0   8    0.00    0.01
  -5   0  -8    0.01    0.01
   6   0   8   16.60    0.35
   6   0   8   16.83    0.37
  -7   0  -8    0.01    0.01
   7   0   8    0.00    0.01
  -8   0  -8    1.08    0.03
 -11   0  -8    0.00    0.01
  11   0   8   -0.01    0.01
  12  -1  -8    0.37    0.01
 -12  -1   8    0.42    0.01
  12   1  -8    0.40    0.01
 -12   1   8    0.38    0.01
 -11  -1   8    0.01    0.01
 -11  -1   8    0.01    0.01
 -11  -1   8    0.02    0.01
  11  -1  -8    0.02    0.01
  11   1  -8    0.02    0.01
 -11   1   8    0.02    0.01
 -11   1   8    0.02    0.01
 -10  -1   8    0.16    0.01
 -10  -1   8    0.16    0.01
 -10  -1   8    0.15    0.01
 -10  -1   8    0.17    0.01
 -10   1   8    0.16    0.01
 -10   1   8    0.16    0.01
 -10   1   8    0.16    0.01
  10   1  -8    0.16    0.01
  -9  -1   8    1.68    0.04
  -9  -1   8    1.61    0.04
  -9  -1   8    1.59    0.05
  -9  -1   8    1.63    0.04
   9   1  -8    1.66    0.04
  -9   1   8    1.70    0.04
  -9   1   8    1.61    0.04
  -9   1   8    1.62    0.04
  -9   1   8    1.64    0.04
  -9   1   8    1.72    0.04
  -8  -1   8    2.54    0.06
  -8  -1   8    2.56    0.06
  -8  -1   8    2.62    0.05
  -8  -1   8    2.62    0.05
  -8   1   8    2.65    0.06
  -8   1   8    2.60    0.06
  -8   1   8    2.61    0.06
  -8   1   8    2.54    0.06
  -8   1   8    2.58    0.06
  -8   1   8    2.55    0.05
   7  -1  -8    0.18    0.01
  -7  -1   8    0.17    0.01
  -7  -1   8    0.19    0.01
   7  -1  -8    0.18    0.02
   7  -1  -8    0.20    0.01
   7   1  -8    0.19    0.02
  -7   1   8    0.18    0.01
  -7   1   8    0.18    0.01
   7   1  -8    0.18    0.01
  -7   1   8    0.17    0.01
  -7   1   8    0.19    0.01
   7   1  -8    0.17    0.01
   7   1  -8    0.18    0.01
  -7   1   8    0.19    0.01
   6  -1  -8   19.77    0.46
   6  -1  -8   19.94    0.41
   6  -1  -8   19.94    0.42
   6   1  -8   20.19    0.42
   6   1  -8   20.20    0.41
   6   1  -8   20.32    0.47
   6   1  -8   19.71    0.46
   5  -1  -8    0.75    0.02
   5  -1  -8    0.75    0.03
   5  -1  -8    0.74    0.02
   5   1  -8    0.75    0.02
   5   1  -8    0.75    0.03
   5   1  -8    0.74    0.03
   5   1  -8    0.82    0.02
   4  -1  -8    0.91    0.02
   4  -1  -8    0.87    0.02
   4  -1  -8    0.88    0.03
   4   1  -8    0.91    0.03
   4   1  -8    0.89    0.02
   4   1  -8    0.88    0.03
   4   1  -8    0.88    0.03
   3  -1  -8   29.00    0.61
   3  -1  -8   28.74    0.58
   3  -1  -8   29.32    0.66
   3   1  -8   28.92    0.61
   3   1  -8   29.45    0.66
   3   1  -8   28.38    0.59
   3   1  -8   28.54    0.66
   2  -1  -8    2.04    0.05
   2  -1  -8    2.02    0.04
   2  -1  -8    1.90    0.05
   2  -1  -8    1.99    0.04
   2   1  -8    2.00    0.05
   2   1  -8    1.95    0.05
   2   1  -8    2.04    0.04
   2   1  -8    1.95    0.05
   1  -1  -8   18.37    0.37
   1  -1  -8   18.34    0.42
   1  -1  -8   19.09    0.39
   1   1  -8   18.54    0.42
   1   1  -8   17.69    0.42
   1   1  -8   18.08    0.39
   1   1  -8   18.71    0.38
   0  -1  -8   12.20    0.25
   0  -1  -8   12.00    0.29
   0  -1  -8   12.71    0.26
   0  -1   8   12.60    0.26
   0   1  -8   12.39    0.25
   0   1  -8   12.76    0.29
   0   1   8   12.47    0.26
   0   1  -8   12.30    0.26
   1  -1   8    0.97    0.03
  -1  -1  -8    0.99    0.03
  -1  -1  -8    0.97    0.02
  -1  -1  -8    0.97    0.03
  -1   1  -8    0.98    0.03
   1   1   8    0.97    0.03
  -1   1  -8    0.95    0.03
  -1   1  -8    0.97    0.03
   2  -1   8   19.43    0.40
  -2  -1  -8   19.50    0.41
  -2  -1  -8   19.56    0.39
  -2  -1  -8   18.60    0.45
   2   1   8   19.71    0.40
  -2   1  -8   19.14    0.39
  -2   1  -8   18.70    0.41
  -2   1  -8   20.21    0.45
  -3  -1  -8    3.68    0.08
  -3  -1  -8    3.78    0.09
  -3  -1  -8    3.71    0.09
   3  -1   8    3.68    0.08
   3   1   8    3.71    0.08
  -3   1  -8    3.82    0.09
  -3   1  -8    3.82    0.08
  -3   1  -8    3.66    0.09
  -4  -1  -8   15.43    0.32
  -4  -1  -8   15.27    0.33
   4  -1   8   15.26    0.32
   4   1   8   15.35    0.34
   4   1   8   15.32    0.32
  -4   1  -8   15.31    0.36
  -5  -1  -8    2.08    0.05
   5  -1   8    2.02    0.05
   5   1   8    2.04    0.05
  -5   1  -8    2.10    0.06
   5   1   8    2.07    0.05
   6  -1   8    0.09    0.01
   6   1   8    0.08    0.01
  -6   1  -8    0.12    0.01
  -6   1  -8    0.11    0.01
   6   1   8    0.11    0.01
  -7  -1  -8    7.21    0.14
   7  -1   8    7.13    0.16
   7   1   8    7.10    0.17
   7   1   8    7.17    0.14
   7   1   8    7.11    0.16
  -7   1  -8    7.30    0.13
  -8  -1  -8    5.06    0.10
  -9  -1  -8    0.51    0.02
   9   1   8    0.49    0.02
  10   1   8    0.06    0.01
 -10   1  -8    0.06    0.01
  11   1   8    0.03    0.01
 -11   1  -8    0.03    0.00
 -12  -2   8    0.06    0.01
 -12   2   8    0.06    0.01
  11  -2  -8    0.04    0.01
 -11  -2   8    0.04    0.01
 -11  -2   8    0.03    0.01
 -11  -2   8    0.03    0.00
 -11   2   8    0.03    0.01
  11   2  -8    0.03    0.01
 -11   2   8    0.03    0.01
 -10  -2   8    0.00    0.01
 -10  -2   8    0.00    0.01
 -10  -2   8    0.00    0.00
 -10  -2   8    0.00    0.01
 -10   2   8    0.01    0.01
 -10   2   8    0.03    0.01
 -10   2   8    0.00    0.01
 -10   2   8    0.00    0.01
  10   2  -8    0.00    0.01
  -9  -2   8    0.10    0.01
  -9  -2   8    0.08    0.01
  -9  -2   8    0.10    0.01
  -9  -2   8    0.11    0.01
  -9   2   8    0.08    0.01
  -9   2   8    0.10    0.01
   9   2  -8    0.10    0.01
  -9   2   8    0.08    0.01
  -9   2   8    0.08    0.01
  -9   2   8    0.10    0.01
  -8  -2   8    0.37    0.02
  -8  -2   8    0.37    0.02
  -8  -2   8    0.38    0.02
   8   2  -8    0.37    0.02
  -8   2   8    0.37    0.02
  -8   2   8    0.39    0.02
  -8   2   8    0.38    0.02
  -8   2   8    0.40    0.02
  -8   2   8    0.39    0.02
  -8   2   8    0.36    0.02
  -7  -2   8    0.26    0.02
   7  -2  -8    0.29    0.02
   7  -2  -8    0.25    0.01
  -7  -2   8    0.25    0.01
  -7  -2   8    0.26    0.01
   7  -2  -8    0.27    0.01
  -7   2   8    0.27    0.01
   7   2  -8    0.25    0.02
  -7   2   8    0.26    0.01
   7   2  -8    0.25    0.02
  -7   2   8    0.27    0.02
  -7   2   8    0.24    0.01
  -7   2   8    0.28    0.02
  -7   2   8    0.28    0.02
   6  -2  -8    0.00    0.01
   6  -2  -8    0.00    0.01
   6  -2  -8    0.01    0.01
   6   2  -8    0.00    0.01
   6   2  -8   -0.01    0.01
   5  -2  -8    1.36    0.03
   5  -2  -8    1.39    0.03
   5  -2  -8    1.32    0.04
   5   2  -8    1.38    0.03
   5   2  -8    1.35    0.04
   5   2  -8    1.37    0.04
   5   2  -8    1.40    0.04
   4  -2  -8    5.30    0.13
   4  -2  -8    5.37    0.12
   4  -2  -8    5.45    0.11
   4   2  -8    5.31    0.13
   4   2  -8    5.43    0.13
   4   2  -8    5.20    0.11
   4   2  -8    5.22    0.12
   3  -2  -8   12.52    0.26
   3  -2  -8   12.48    0.29
   3   2  -8   12.35    0.25
   3   2  -8   12.51    0.26
   3   2  -8   12.33    0.29
   3   2  -8   12.37    0.29
   2  -2  -8   13.05    0.27
   2  -2  -8   12.84    0.30
   2  -2  -8   12.59    0.30
   2   2  -8   12.85    0.26
   2   2  -8   12.77    0.30
   2   2  -8   13.12    0.30
   2   2  -8   12.70    0.27
   1  -2  -8    0.11    0.01
   1  -2  -8    0.10    0.01
   1   2  -8    0.10    0.01
   1   2  -8    0.09    0.01
   1   2  -8    0.09    0.01
   1   2  -8    0.11    0.01
   0  -2  -8   97.13    2.23
   0  -2  -8   97.72    1.96
   0  -2   8   99.38    2.01
   0  -2  -8   98.49    2.04
   0   2  -8   95.26    1.97
   0   2  -8   98.17    2.25
   0   2  -8   93.53    2.21
   0   2  -8   96.67    2.04
  -1  -2  -8   18.47    0.38
  -1  -2  -8   18.81    0.39
  -1  -2  -8   18.64    0.43
   1  -2   8   18.70    0.39
  -1   2  -8   19.16    0.44
  -1   2  -8   18.65    0.40
  -1   2  -8   18.91    0.38
  -2  -2  -8   40.08    0.85
   2  -2   8   40.75    0.84
  -2  -2  -8   41.80    0.83
   2   2   8   40.77    0.89
  -2   2  -8   39.79    0.82
   3  -2   8    0.62    0.02
  -3  -2  -8    0.61    0.02
  -3  -2  -8    0.61    0.02
  -3   2  -8    0.60    0.03
   3   2   8    0.63    0.02
   3   2   8    0.62    0.02
  -4  -2  -8    0.42    0.02
  -4  -2  -8    0.41    0.02
   4  -2   8    0.41    0.02
   4   2   8    0.43    0.02
  -4   2  -8    0.44    0.02
   4   2   8    0.40    0.02
  -5  -2  -8    0.03    0.01
  -5  -2  -8    0.02    0.01
   5  -2   8    0.01    0.01
  -5   2  -8    0.02    0.01
   5   2   8    0.02    0.01
  -6  -2  -8    0.96    0.03
   6  -2   8    0.97    0.03
   6   2   8    0.97    0.03
   6   2   8    0.97    0.03
  -6   2  -8    0.97    0.02
  -6   2  -8    1.00    0.04
  -7  -2  -8    0.38    0.02
   7   2   8    0.40    0.02
   7   2   8    0.40    0.02
   7   2   8    0.37    0.02
  -8  -2  -8    0.01    0.01
   8   2   8   -0.01    0.01
  -9  -2  -8    0.01    0.01
  -9   2  -8    0.00    0.01
   9   2   8    0.00    0.01
 -10   2  -8    0.22    0.01
  10   2   8    0.22    0.01
 -11   2  -8    0.17    0.01
 -11   2  -8    0.16    0.01
  11   2   8    0.16    0.01
 -11  -3   8    0.58    0.02
 -11  -3   8    0.57    0.01
 -11  -3   8    0.57    0.02
 -11   3   8    0.54    0.02
 -11   3   8    0.59    0.02
  11   3  -8    0.56    0.01
 -11   3   8    0.55    0.02
 -10  -3   8    0.02    0.01
 -10  -3   8    0.01    0.00
 -10  -3   8    0.01    0.01
 -10  -3   8    0.02    0.01
 -10  -3   8    0.02    0.01
  10   3  -8    0.01    0.01
 -10   3   8    0.01    0.01
 -10   3   8    0.01    0.01
 -10   3   8    0.01    0.01
 -10   3   8    0.02    0.01
  -9  -3   8    0.02    0.01
  -9  -3   8    0.03    0.01
   9   3  -8    0.03    0.01
  -9   3   8    0.03    0.01
  -9   3   8    0.03    0.01
  -9   3   8    0.04    0.01
  -9   3   8    0.03    0.01
  -9   3   8    0.03    0.01
  -8  -3   8    0.01    0.01
  -8  -3   8    0.00    0.01
  -8   3   8    0.03    0.01
   8   3  -8    0.02    0.01
  -8   3   8    0.02    0.01
  -8   3   8    0.04    0.01
  -8   3   8    0.03    0.01
  -8   3   8    0.01    0.01
  -7  -3   8    0.64    0.03
  -7  -3   8    0.64    0.02
  -7  -3   8    0.64    0.02
  -7   3   8    0.68    0.02
  -7   3   8    0.66    0.02
  -7   3   8    0.64    0.02
  -7   3   8    0.65    0.02
  -7   3   8    0.65    0.02
  -7   3   8    0.67    0.02
   7   3  -8    0.67    0.02
  -6  -3   8    0.03    0.01
   6  -3  -8    0.02    0.01
   6  -3  -8    0.01    0.01
   6  -3  -8    0.01    0.01
  -6  -3   8    0.01    0.01
   6   3  -8    0.02    0.01
   6   3  -8    0.01    0.01
  -6   3   8    0.01    0.01
   5  -3  -8    0.91    0.03
   5  -3  -8    0.95    0.03
   5  -3  -8    0.94    0.02
   5   3  -8    0.93    0.03
   4  -3  -8    0.08    0.01
   4  -3  -8    0.06    0.01
   4  -3  -8    0.06    0.00
   4   3  -8    0.06    0.01
   3  -3  -8    3.20    0.08
   3  -3  -8    3.20    0.07
   3   3  -8    3.04    0.08
   3   3  -8    3.13    0.08
   2  -3  -8    3.75    0.09
   2   3  -8    3.89    0.08
   2   3  -8    3.92    0.10
   2   3  -8    3.99    0.10
   1  -3  -8    1.72    0.04
   1  -3  -8    1.68    0.05
   1   3  -8    1.72    0.05
   1   3  -8    1.65    0.04
   1   3  -8    1.77    0.05
   0  -3  -8    8.28    0.17
   0  -3   8    8.28    0.17
   0   3  -8    8.15    0.19
   0   3  -8    7.96    0.19
  -1  -3  -8   13.89    0.29
[truncated: 301,916 more chars]
